# Supplementary material
Source: PubMed Central journal article supplement (PMC9427129)
Supplement: NIHMS1832383-supplement-Supporting_Information.pdf [file NIHMS1832383-supplement-Supporting_Information.pdf]

## **Supplementary Materials**

### **Enantioselective hydrogen-bond-donor catalysis to access diverse stereogenic-at-P(V) compounds**

**Katherine C. Forbes and Eric N. Jacobsen\***

*Department of Chemistry and Chemical Biology, Harvard University, Cambridge, Massachusetts  
02138*

\*Corresponding author. Email: [jacobsen@chemistry.harvard.edu](mailto:jacobsen@chemistry.harvard.edu)

## Table of Contents

|                                                                                                                         |      |
|-------------------------------------------------------------------------------------------------------------------------|------|
| General information.....                                                                                                | S3   |
| General procedures.....                                                                                                 | S6   |
| Scope of catalytic enantioselective substitution of phosphonyl dichlorides by diisoamylamine.....                       | S17  |
| Scope of enantiospecific nucleophile substitution of phenyl chlorophosphonamidate <b>3</b> by various nucleophiles..... | S35  |
| Enantiospecific displacement of diisoamylamino group with alcohols.....                                                 | S52  |
| Stereospecific phosphorylation of precious alcohols with phosphonothioate <b>6d</b> .....                               | S71  |
| Stereospecific reaction of phosphonate <b>6b</b> with organomagnesium reagents.....                                     | S77  |
| Synthesis of (+)-SMT022332.....                                                                                         | S84  |
| Formal synthesis of Matrix Metalloproteinase inhibitor ( <b>17</b> ).....                                               | S92  |
| Deallylation of methyl <i>N</i> -allyl- <i>N</i> -benzyl- <i>P</i> -phenylphosphonamidate .....                         | S100 |
| Reaction optimization.....                                                                                              | S103 |
| Comparison of General Procedure A and General Procedure B for various nucleophiles.....                                 | S106 |
| Comparison of conditions for synthesis of compound <b>4f</b> .....                                                      | S107 |
| Comparison of conditions for synthesis of compound <b>4g</b> .....                                                      | S107 |
| Effect of tetrabutylammonium chloride additive on catalytic reaction and racemic reaction....                           | S108 |
| Racemization studies of chlorophosphonamidate <b>3</b> .....                                                            | S110 |
| X-ray crystallography.....                                                                                              | S114 |
| NMR spectra.....                                                                                                        | S128 |
| NMR spectra of crude non-commercial phosphonyl dichlorides.....                                                         | S208 |
| References.....                                                                                                         | S221 |

## General Information

### Methods:

All reactions were performed in standard, oven-dried glassware fitted capped with rubber septa under a N<sub>2</sub> atmosphere. Concentration of solutions was carried out under reduced pressure using house vacuum (40 torr) at 35 °C unless otherwise described. Concentrations refer to solution volumes at room temperature (~22 °C). High-vacuum was achieved using a vacuum pump at 400 mTorr. Flash column chromatography was performed using a Biotage Isolera One system. Thin layer chromatography was used for product detection using Silica Gel 60 F254 plates, with visualization effected via exposure to UV Light ( $\lambda_{\text{ex}} = 254 \text{ nm}$ ) or staining and heating with KMnO<sub>4</sub> or cerium ammonium molybdate.

### Materials and Reagents:

Catalyst **1a** ((R)-N-[(1R,2R)-2-(3-(3,5-Bis(trifluoromethyl)phenyl)ureido)cyclohexyl]-tert-butylsulfonamide ; CAS = 934762-68-2) and phenyl phosphonic dichloride **2a** (CAS = 824-72-6) were purchased from Sigma-Aldrich and used as received. Diisoamylamine (CAS = 544-00-3) and 4-methoxyphenyl phosphonic dichloride **4g** (CAS = 37632-18-1) were purchased from TCI America and used as received. All other reagents and solvents were purchased from commercial suppliers including Sigma-Aldrich, TCI, Alfa Aesar, Acros Organics, Matrix Scientific, Cambridge Isotope Laboratories, or Strem and used as received. Anhydrous solvents (diethyl ether, toluene, tetrahydrofuran (THF), dichloromethane (DCM), and dimethylformamide (DMF)) were dried using activated alumina columns. Deuterated solvents were purchased from Cambridge Isotope Laboratories.

### Special Note:

Aryl phosphonic dichlorides (**2a-g**) are hydrolytically sensitive and undergo decomposition when exposed to air. These reagents should be stored under an anhydrous/inert atmosphere. Optimal results were achieved by using phosphoryl dichlorides immediately after preparation or freshly distilled under inert atmosphere. Similarly, aryl chlorophosphonamidate **3** and its analogues are susceptible to decomposition and/or racemization upon attempted purification. These intermediates are best used immediately via in situ addition of a nucleophile or via filtration and partial concentration according to the procedures reported herein. Alternatively, the aryl chlorophosphonamidate intermediates may be stored as crude mixtures at  $-78\text{ }^{\circ}\text{C}$ .

#### **Instrumentation:**

Nuclear magnetic resonance (NMR) spectra were recorded on a Bruker AVANCE NEO 400 or Bruker AVANCE NEO 400B spectrometer. Proton NMR spectra are reported in parts per million (ppm) downfield from tetramethylsilane and are referenced using the NMR solvent ( $\text{CDCl}_3$ : 7.26 ppm,  $\text{C}_6\text{D}_6$ : 7.16 ppm). Proton-decoupled  $^{13}\text{C}$  NMR spectra are reported in ppm downfield from tetramethylsilane, and are referenced using the NMR solvent ( $\text{CDCl}_3$ : 77.16 ppm,  $\text{C}_6\text{D}_6$ : 128.06 ppm). Proton-decoupled  $^{31}\text{P}$  NMR spectra are reported in ppm downfield from 85%  $\text{H}_3\text{PO}_4$ .  $^{19}\text{F}$  NMR spectra are reported in ppm downfield from chlorotrifluoromethane. Splitting patterns for peaks on NMR spectra are represented as: (s = singlet, d = doublet, t = triplet, q = quartet, p = pentet, sext = sextet, sept = septet, m = multiplet). Coupling constants are measured in Hertz (Hz). High-resolution Mass Spectrometry (HRMS) data were acquired by the Harvard FAS Division of Science Small Molecule Mass Spectrometry facility. Gas chromatography (GC) analysis was performed on an Agilent 7890A series GC system outfitted with a commercially available Cyclodex B (60 m) column. Chiral high-performance liquid chromatography (HPLC) analysis

was performed using an Agilent 1200 series quaternary HPLC system with commercially available CHIRALCEL and CHIRALPAK analytical columns (4.6 x 250 mm). Optical rotations ( $[\alpha]$ ) were obtained using a Jasco DIP 370 digital polarimeter at 589 nm using sodium D line at 22 °C in a 1 mL cell with a 0.5 dm path length.

**Abbreviations Used:**

Ar = aryl, Bn = benzyl, c = concentration, Bz = Benzoyl, Cbz = benzyloxycarbonyl, DCM = dichloromethane, DMF = dimethylformamide, d.r. = diastereomer ratio, ds = diastereospecificity (i.e. stereospecificity for reaction of a chiral compound to another chiral compound), ee = enantiomeric excess, es = enantiospecificity, Et = ethyl, equiv = equivalents, Et<sub>2</sub>O = diethyl ether, EtOAc = ethyl acetate, EtOH = ethanol, g = grams, h = hours, HPLC = high-performance liquid chromatography, HRMS = high-resolution mass spectrometry, mg = milligrams, Hz = Hertz, <sup>i</sup>Am = isoamyl, <sup>i</sup>Bu = isobutyl, <sup>i</sup>Pr = isopropyl, <sup>i</sup>PrOH = isopropyl alcohol, MeOH = methanol, NaHMDS = sodium hexamethyldisilazide, Me = methyl, min = minutes, m/z = mass to charge ratio, <sup>n</sup>Bu = *n*-butyl, NMR = nuclear magnetic resonance, Ph = phenyl, ppm = parts per million, *p*-TsOH = para-toluenesulfonic acid, TBME = *tert*-butyl methyl ether, TFA = trifluoroacetic acid, THF = tetrahydrofuran, TMS = trimethylsilyl, Ts = para-tolylsulfonyl.

## **General procedures for catalytic, enantioselective nucleophilic substitution reaction and sequential enantiospecific substitution reactions:**

General Procedure A describes the procedure for the enantioselective substitution by amine followed by direct substitution by a second nucleophile *in situ*.

General Procedure B describes the procedure for the enantioselective substitution by amine followed by filtration and addition by a second nucleophile in a separate step.

General Procedure C describes a procedure for the enantioselective substitution by amine followed by direct substitution by methoxide using a prepared sodium methoxide solution.

General Procedure D describes a procedure for the synthesis of racemic amine substitution products.

General Procedure E describes a procedure for the displacement of the diisoamylamino group with alcohols.

General Procedure F describes a procedure for the phosphorylation of alcohols with compound **6d**.

General Procedure G describes a procedure for the addition of Grignard reagents to compound **6b**.

General Procedure H describes a procedure for the synthesis of non-commercial phosphoryl dichlorides.

General Procedure I describes the procedure used for preparation of 4 Å molecular sieves.

## General Procedure A

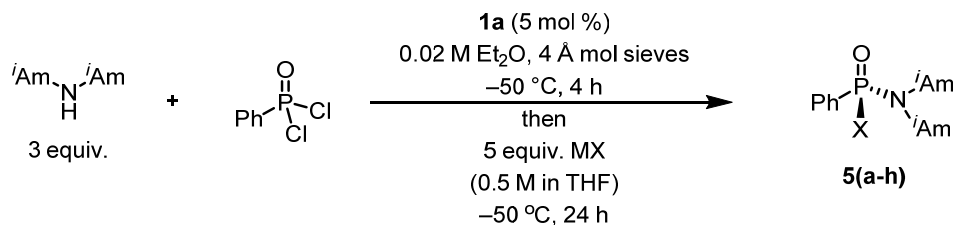

*\*Note: The success of this reaction relies on vigorous stirring and use of properly activated molecular sieves (see **General Procedure I**).*

An oven-dried 40 mL vial equipped with a magnetic stir bar was charged with catalyst **1a** (5 mg, 0.01 mmol), 4 Å mol sieves (200 mg), and diisooamylamine (140 μL, 0.7 mmol, 3.5 equiv.). The vial was then capped with a septum, sealed with parafilm, and put under N<sub>2</sub> atmosphere. The vial was charged with diethyl ether (10 mL), and the reaction mixture was cooled to -50 °C and subjected to stirring at that temperature for 20 minutes. Phenyl phosphonic dichloride (28 μL, 0.2 mmol, 1 equiv.) dissolved in toluene (0.5 mL) was then added in one portion, and the reaction mixture was subjected to stirring at -50 °C for 4 to 24 hours.

A separate oven-dried 2-dram vial with a magnetic stir bar was charged with 120 mg of sodium hydride (3 mmol, 15 equiv., 60% in mineral oil). The vial was then capped with a septum, sealed with parafilm, and put under N<sub>2</sub> atmosphere. The vial was then charged with THF (2 mL) and the resulting mixture was subjected to stirring at room temperature for 1 minute. The nucleophile (5 equiv., 1 mmol) dissolved in THF (0.5 mL) was then added dropwise over 2 min. via a syringe to the stirring sodium hydride mixture, and stirring was continued at room temperature for 30 minutes after addition. The resultant mixture was then added in a single portion directly to the catalytic reaction mixture generated as described above at -50 °C. The resultant mixture was then subjected to stirring for 24 hours at -50 °C. The mixture was then concentrated under reduced pressure and

purified by flash column chromatography on silica gel.

### General Procedure B

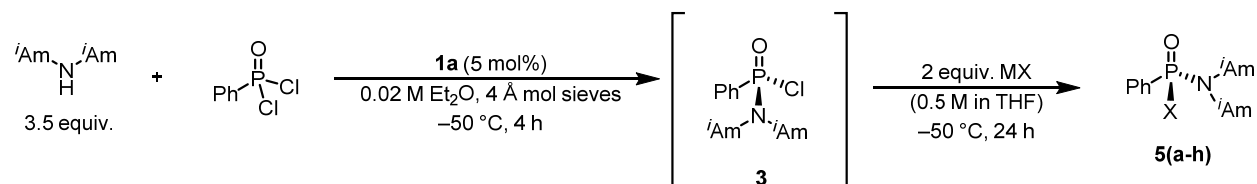

*\*Note: The success of this reaction relies on vigorous stirring and use of properly activated molecular sieves (see **General Procedure I**).*

An oven-dried 40 mL vial equipped with a magnetic stir bar was charged with catalyst **1a** (5 mg, 0.01 mmol, 0.05 equiv.), 4 Å mol sieves (200 mg), and diisoamylamine (140 μL, 0.7 mmol, 3.5 equiv.). The vial was then capped with a septum, sealed with parafilm, and put under N<sub>2</sub> atmosphere. The vial was charged with diethyl ether (10 mL), and the reaction mixture was cooled to -50 °C and subjected to stirring at that temperature for 20 minutes. A solution of phenyl phosphonic dichloride (28 μL, 0.2 mmol, 1 equiv.) in toluene (0.5 mL) was then added in one portion, and the reaction mixture was subjected to stirring at -50 °C for 4 hours. The mixture was filtered at room temperature through ~10 grams of silica to remove remaining amine, ammonium chloride byproduct, and catalyst. The filtered solution was then transferred to a 20 mL vial and concentrated under reduced pressure while kept at a temperature of 0 °C or below to remove the Et<sub>2</sub>O until ~0.5 mL toluene remained (**Note: this product undergoes racemization when concentrated above room temperature**). The crude toluene solution of product **3** was then diluted with THF (1.5 mL) and transferred to an oven-dried 2-dram vial equipped with a magnetic stir bar and a septum cap. The vial was sealed with parafilm and put under N<sub>2</sub> atmosphere and allowed to stir at -50 °C for 20 minutes.



A separate oven-dried 2-dram vial equipped with a magnetic stir bar was charged with sodium hydride (48 mg, 1.2 mmol, 6 equiv., 60% in mineral oil). The vial was then capped with a septum, sealed with parafilm, and put under N<sub>2</sub> atmosphere. THF (0.5 mL) was then added, and the resulting mixture was subjected to stirring at room temperature for ~1 minute. The nucleophile (2 equiv., 0.4 mmol) dissolved in THF (0.1 mL) was then added dropwise via a syringe through the septum to the stirring mixture over a 2-minute period. The mixture was then allowed to stir at room temperature for 30 minutes to ensure full deprotonation of the nucleophile. The resultant mixture was then added directly to the stirred solution of chlorophosphonamidate produced as described above at -50 °C and stirring was continued at -50 °C for 24 hours. The mixture was then concentrated under reduced pressure and purified by flash column chromatography on silica gel.

### General Procedure C

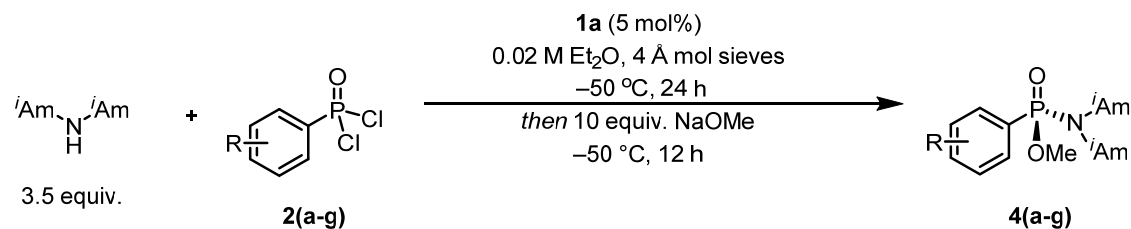

*\*Note: The success of this reaction relies on vigorous stirring and use of properly activated molecular sieves (see **General Procedure I**).*

An oven-dried 40 mL vial equipped with a magnetic stir bar was charged with catalyst **1a** (5 mg, 0.01 mmol, 0.05 equiv.), 4 Å mol sieves (200 mg), and diisopropylamine (140 μL, 0.7 mmol, 3.5 equiv.). The vial was then capped with a septum, sealed with parafilm, and put under N<sub>2</sub> atmosphere. The vial was charged with diethyl ether (10 mL), and the reaction mixture was cooled to -50 °C and subjected to stirring at that temperature for 20 minutes. The aryl phosphonic

dichloride (0.2 mmol, 1 equiv.) dissolved in toluene (0.5 mL) was then added in one portion, and the reaction mixture was subjected to stirring at  $-50\text{ }^{\circ}\text{C}$  for 24 hours.

A separate oven-dried 2-dram vial with a magnetic stir bar was charged with sodium hydride (80 mg, 2 mmol, 10 equiv., 60% in mineral oil). The vial was then capped with a septum, sealed with parafilm, and put under  $\text{N}_2$  atmosphere. The vial was then charged with THF (1.5 mL) and the mixture was allowed to stir at room temperature for 1 minute. Methanol (0.5 mL) was then added dropwise via a syringe through the septum over a 2-minute period to the stirring mixture, and stirring was continued at room temperature until clear. If the mixture remained cloudy after 10 minutes, additional methanol (0.1 mL) was introduced to ensure complete dissolution of sodium methoxide. The resultant sodium methoxide solution was then added directly in a single portion to the solution of chlorophosphonamidate produced as described immediately above at  $-50\text{ }^{\circ}\text{C}$ . The resulting reaction mixture was then subjected to stirring for 12 hours at  $-50\text{ }^{\circ}\text{C}$ , and then concentrated under reduced pressure and purified by flash column chromatography on silica gel.

### General Procedure for Racemic Reference Samples

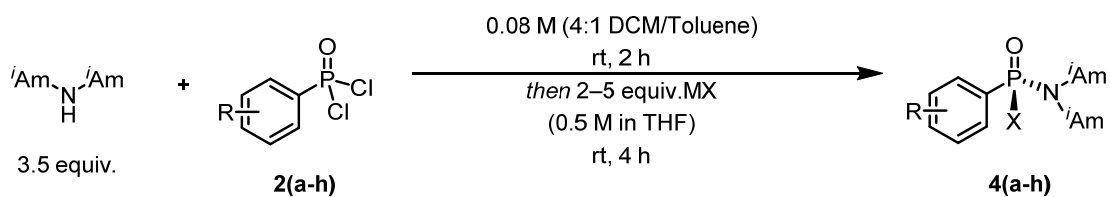

An oven-dried 20 mL vial equipped with a magnetic stir bar was charged with diisopropylamine (140  $\mu\text{L}$ , 0.7 mmol, 3.5 equiv.). The vial was then capped with a septum, sealed with parafilm, and put under  $\text{N}_2$  atmosphere. The vial was charged with DCM (2 mL), followed by 0.2 mmol of aryl phosphonic dichloride (**2a-g**) dissolved in toluene (0.5 mL), and the reaction mixture was subjected to stirring at room temperature for 2 hours, or until reaction completion. The reaction was then quenched according to one of the following procedures:

For racemic standards of 4a–g:

A separate oven-dried 2-dram vial with a magnetic stir bar was charged with 80 mg of sodium hydride (2 mmol, 10 equiv., 60% in mineral oil). The vial was then capped with a septum, sealed with parafilm, and put under N<sub>2</sub> atmosphere. The vial was then charged with THF (1.5 mL) and allowed to stir at room temperature for 1 minute. Methanol (0.5 mL) was then added dropwise via a syringe through the septum to the stirring mixture over a 2-minute period, and the solution was subjected to stirring at room temperature until clear. If the mixture remained cloudy after 10 minutes, additional methanol (0.1 mL) was introduced to ensure complete dissolution of sodium methoxide. The resultant sodium methoxide solution was then added directly in a single portion to the solution of chlorophosphonamidate produced as described immediately above. The reaction mixture was then subjected to stirring for 4 hours at room temperature, after which point it was concentrated under reduced pressure and purified by flash column chromatography on silica gel.

For racemic standards of 5a–e:

A separate oven-dried 2-dram vial with a magnetic stir bar was charged with sodium hydride (120 mg, 3 mmol, 15 equiv., 60% in mineral oil). The vial was then capped with a septum, sealed with parafilm, and put under N<sub>2</sub> atmosphere. The vial was then charged with THF (2 mL) and allowed to stir at room temperature for 1 minute. The nucleophile (5 equiv., 1 mmol) dissolved in THF (0.5 mL) was then added dropwise via a syringe through the septum to the stirring sodium hydride mixture over a 2-minute period, and stirring was continued at room temperature for 30 minutes. The resultant mixture was then added directly as a single portion directly to the solution of chlorophosphonamidate **3** stirring in DCM. The resultant mixture was then subjected to stirring for 4 hours at room temperature. Afterwards, the mixture was concentrated under reduced pressure and purified by flash column chromatography on silica gel.

For racemic standard of **5f**:

Upon reaction completion, the mixture was filtered through ~10 grams of silica to remove remaining amine, ammonium chloride byproduct, and catalyst. The filtered solution was then transferred to a 20 mL vial and concentrated under reduced pressure while kept at a temperature of 0 °C or below to remove the Et<sub>2</sub>O until ~0.5 mL toluene remained. The crude phosphoramidate in toluene (**3**) was then dissolved in THF (2 mL) and transferred to an oven-dried 2-dram vial equipped with a magnetic stir bar and capped with a septum. The vial was sealed with parafilm and put under a N<sub>2</sub> atmosphere and allowed to stir at room temperature for ~1 minute.

A separate oven-dried 2-dram vial equipped with a magnetic stir bar was charged with sodium hydride (48 mg, 1.2 mmol, 6 equiv., 60% in mineral oil). The vial was then capped with a septum, sealed with parafilm, and put under N<sub>2</sub> atmosphere. THF (0.5 mL) was then added, and the mixture was allowed to stir at room temperature for ~1 minute. Benzyl carbamate (60 mg, 0.4 mmol, 2 equiv.) dissolved in THF (0.2 mL) was then added dropwise via a syringe through the septum to the stirring mixture over a 2-minute period. The mixture was then allowed to stir at room temperature for 30 minutes to ensure full deprotonation of the nucleophile. The resultant mixture was then added directly in a single portion to the solution of chlorophosphoramidate produced as described immediately above. The resultant mixture was subjected to stirring at room temperature for 4 hours. Upon completion, the mixture was concentrated under reduced pressure and purified by flash column chromatography on silica gel.

For racemic standards of **5g-h**:

Upon reaction completion, the mixture was filtered through ~10 grams of silica to remove remaining amine, ammonium chloride byproduct, and catalyst. The filtered solution was then transferred to a 20 mL vial and concentrated under reduced pressure while kept at a temperature

of 0 °C or below to remove the Et<sub>2</sub>O until ~0.5 mL toluene remained. The crude product in toluene (**3**) was then dissolved in THF (2 mL) and transferred to an oven-dried 2-dram vial equipped with a magnetic stir bar and capped with a septum. The vial was sealed with parafilm and put under N<sub>2</sub> atmosphere and allowed to stir at room temperature for ~1 minute.

The Grignard reagent (5 equiv., 0.4 mmol) was then added in a single portion to the solution of chlorophosphonamidate **3** stirring in THF. The reaction was subsequently subjected to stirring at room temperature for 4 hours. Upon completion, the mixture was concentrated under reduced pressure and purified by flash column chromatography on silica gel.

### General Procedure E

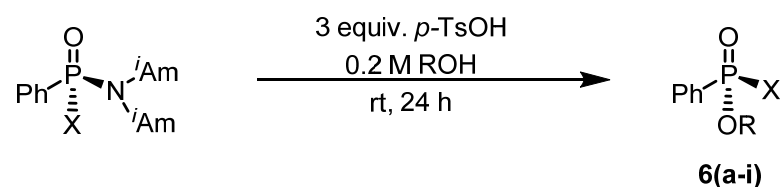

An oven-dried 2-dram vial equipped with a magnetic stir bar was charged with the substrate (**5a-h**). The vial was then capped with a septum, sealed with parafilm, and put under N<sub>2</sub> atmosphere. A 0.6 M solution of *para*-tolylsulfonic acid monohydrate (3 equiv.) in the corresponding alcohol was then added through the septum, and the reaction was allowed to stir at room temperature for 24 hours. *Do not concentrate*. After 24 hours, the methanol solution was loaded directly onto a silica gel column that had been packed and equilibrated with solvent and purified via flash column chromatography.

### General Procedure F

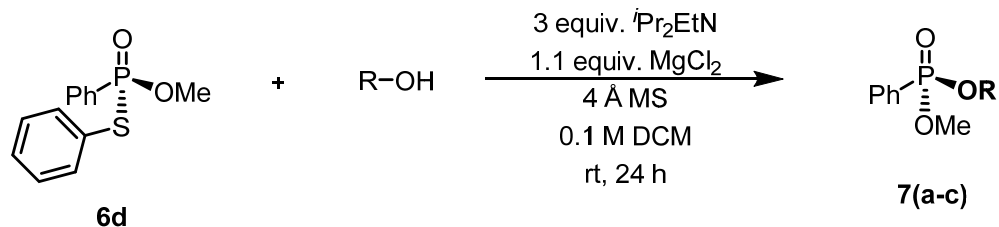

An oven-dried 2-dram vial equipped with a magnetic stir bar was charged with MgCl<sub>2</sub> (10 mg, 0.11 mmol, 1.1 equiv.), 4 Å mol sieves (50 mg), and the alcohol to be phosphonylated. The vial was capped with a septum, sealed with parafilm, and put under N<sub>2</sub> atmosphere. The vial was then charged with DCM (0.7 mL) followed by *N,N*-diisopropylethylamine (52 μL, 0.3 mmol, 3 equiv.). The solution was allowed to stir at room temperature for ~1 minute. Then phosphonothioate **6d** (26.2 mg, 0.1 mmol, 1 equiv.) dissolved in DCM (0.3 mL) was added in one portion through the septum cap. The reaction was then allowed to stir at room temperature for 24 hours. *Do not concentrate*. After 24 hours, the solution was loaded directly onto a silica gel column that had been packed and equilibrated with solvent and purified via flash column chromatography.

### General Procedure G

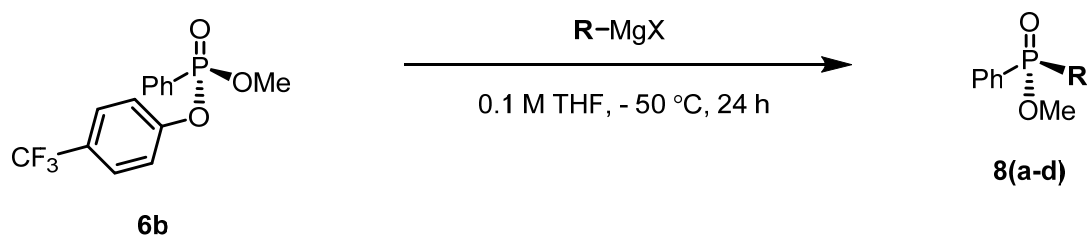

An oven-dried 2-dram vial equipped with a magnetic stir bar was charged with phosphonate **6b** (1 equiv.). The vial was then capped with a septum, sealed with parafilm, and put under N<sub>2</sub> atmosphere. The vial was then charged with THF (0.1 M) and allowed to stir at room temperature for ~1 minute. The solution was then cooled and subjected to stirring at -50 °C for 20 minutes. Next, the Grignard reagent was added through the septum cap, and the reaction mixture was then

allowed to stir at  $-50\text{ }^{\circ}\text{C}$  for 24 hours. After 24 hours had elapsed, isopropanol ( $50\text{ }\mu\text{L}$ ) was added to the solution at  $-50\text{ }^{\circ}\text{C}$  to quench any remaining Grignard reagent. *Do not concentrate*. The resultant solution was loaded directly onto a silica gel column that had been packed and equilibrated with solvent and purified via flash column chromatography.

#### General Procedure H:

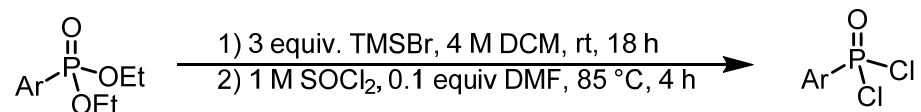

Conditions were adapted from a reported procedure for synthesis of phosphonyl dichlorides (49). An oven-dried 2-dram vial equipped with a magnetic stir bar was charged with the aryl phosphonate ester (0.4 mmol, 1 equiv.). The vial was then capped with a septum, sealed with parafilm, and put under  $\text{N}_2$  atmosphere. The vial was then charged with DCM (0.1 mL) and allowed to stir at room temperature for  $\sim 1$  minute. Bromotrimethylsilane ( $158\text{ }\mu\text{L}$ , 1.2 mmol, 3 equiv.) was then added to the stirring solution via syringe through the septum. The resulting solution was then subjected to stirring 18 hours at room temperature. After subjection to stirring for 18 hours, the solution was concentrated under reduced pressure in the same vial, then subjected to high vacuum to remove the remaining bromotrimethylsilane and solvent. The vial was then capped with a new septum, sealed with electrical tape, and evacuated/backfilled three times with  $\text{N}_2$ .  $\text{SOCl}_2$  (0.4 mL) and DMF ( $3\text{ }\mu\text{L}$ , 0.04 mmol, 0.1 equiv.) were then added to the vial via a syringe through the septum. The top of the vial was then sealed tightly with electrical tape. The solution was then subjected to stirring at  $85\text{ }^{\circ}\text{C}$  for 4 hours. Afterwards, the solution was cooled to room temperature. Without exposing the mixture to the atmosphere, the  $\text{SOCl}_2$ ,  $\text{HCl}$ , and other volatiles were removed via a syringe needle inserted through the septum cap positioned above the

solution and attached to a high-vacuum line. The resulting crude phosphonyl dichloride was used immediately without further purification.

#### **General Procedure I:**

Powdered 4 Å molecular sieves (50 grams, 325 mesh, activated; CAS = 70955-01-0) were added to a 500 mL round bottom flask equipped with a large magnetic stir bar. The flask size was chosen such that the sieves filled no more than  $\sim 1/4$  of the volume of the flask. The flask was then fitted with an adapter with an inlet and placed under vacuum. The flask was then submerged in an oil bath, insulated with foil, and heated to 220 °C over a magnetic stir plate. The flask was maintained under constant vacuum for 5 days while the sieves were subjected to stirring continuously at 220 °C. Afterwards, the dried molecular sieves were stored in a sealed container under N<sub>2</sub>.



## Scope of catalytic enantioselective substitution of phosphonyl dichlorides by diisoamylamine

### Naphthalen-2-ylphosphonic dichloride (**2b**)

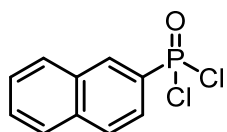

**2b**

Following **General Procedure H**, phosphonic dichloride **2b** was prepared from diethyl naphthalen-2-ylphosphonate (106 mg, 0.4 mmol) and used directly without further purification in the catalytic reaction. Analysis of phosphonic dichloride **2b** by  $^1\text{H}$  and  $^{31}\text{P}$ , and  $^{13}\text{C}$  NMR confirmed clean conversion with no remaining starting material or detectable byproducts.  $^1\text{H}$  NMR (400 MHz,  $\text{C}_6\text{D}_6$ )  $\delta$  8.39 (d,  $J = 18.5$  Hz, 1H), 7.55 (ddd,  $J = 15.4, 8.6, 1.7$  Hz, 1H), 7.41 – 7.34 (m, 2H), 7.32 (d,  $J = 8.2$  Hz, 1H), 7.24 – 7.02 (m, 2H);  $^{13}\text{C}$  NMR (101 MHz,  $\text{C}_6\text{D}_6$ )  $\delta$  135.34 (d,  $J = 3.5$  Hz), 132.99 (d,  $J = 13.1$  Hz), 132.06 (d,  $J = 59.4$  Hz), 131.19 (d,  $J = 75.2$  Hz), 129.41, 129.34, 129.32, 129.16, 127.38 (d,  $J = 1.8$  Hz), 123.94 (d,  $J = 14.9$  Hz);  $^{31}\text{P}$  NMR (162 MHz,  $\text{C}_6\text{D}_6$ )  $\delta$  33.31.

### (3-bromophenyl)phosphonic dichloride (**2c**)

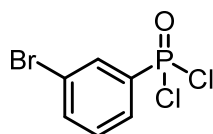

**2c**

Following **General Procedure H**, phosphonic dichloride **2c** was prepared from diethyl (3-bromophenyl)phosphonate (118 mg, 0.4 mmol) and used directly without further purification in the catalytic reaction. Analysis of phosphonic dichloride **2c** by  $^1\text{H}$  and  $^{31}\text{P}$ , and  $^{13}\text{C}$  NMR confirmed clean conversion with no remaining starting material or significant byproducts observed.  $^1\text{H}$  NMR (400 MHz,  $\text{C}_6\text{D}_6$ )  $\delta$  7.89 (dt,  $J = 18.0, 1.7$  Hz, 1H), 7.41 (dd,  $J = 17.3, 7.6$  Hz, 1H), 7.11 (d,  $J = 8.0$  Hz, 1H), 6.56 (q,  $J = 7.6$  Hz, 1H);  $^{13}\text{C}$  NMR (101 MHz,  $\text{C}_6\text{D}_6$ )  $\delta$  137.03 (d,  $J = 3.7$  Hz), 136.52 (d,  $J = 153.5$  Hz), 132.58 (d,  $J = 14.9$  Hz), 130.44 (d,  $J = 19.6$  Hz), 128.51 (d,  $J = 13.0$  Hz), 123.06 (d,  $J = 24.0$  Hz);  $^{31}\text{P}$  NMR (162 MHz,  $\text{C}_6\text{D}_6$ )  $\delta$  30.18.

#### (3-methoxyphenyl)phosphonic dichloride (**2d**)

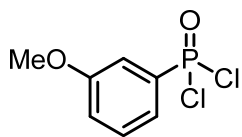

**2d**

Following **General Procedure H**, phosphonic dichloride **2d** was prepared from diethyl (3-methoxyphenyl)phosphonate (98 mg, 0.4 mmol) and used directly without further purification in the catalytic reaction. Analysis of phosphonic dichloride **2d** by  $^1\text{H}$  and  $^{31}\text{P}$ , and  $^{13}\text{C}$  NMR confirmed clean conversion with no remaining starting material or significant byproducts observed.  $^1\text{H}$  NMR (400 MHz,  $\text{C}_6\text{D}_6$ )  $\delta$  7.39 – 7.24 (m, 2H), 6.85 (q,  $J = 7.9$  Hz, 1H), 6.69 (d,  $J = 7.5$  Hz, 1H), 3.10 (s, 3H);  $^{13}\text{C}$  NMR (101 MHz,  $\text{C}_6\text{D}_6$ )  $\delta$  159.61 (d,  $J = 23.2$  Hz), 135.81 (d,  $J = 153.2$  Hz), 130.19 (d,  $J = 22.1$  Hz), 122.28 (d,  $J = 13.4$  Hz), 120.75 (d,  $J = 4.0$  Hz), 114.39 (d,  $J = 15.6$  Hz), 54.71;  $^{31}\text{P}$  NMR (162 MHz,  $\text{C}_6\text{D}_6$ )  $\delta$  33.57.

**(3-chlorophenyl)phosphonic dichloride (2e)**

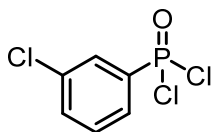

**2e**

Following **General Procedure H**, phosphonic dichloride **2e** was prepared from diethyl (3-chlorophenyl)phosphonate (100 mg, 0.4 mmol) and used directly without further purification in the catalytic reaction. Analysis of phosphonic dichloride **2e** by  $^1\text{H}$  and  $^{31}\text{P}$ , and  $^{13}\text{C}$  NMR confirmed clean conversion with no remaining starting material or significant byproducts observed.  $^1\text{H}$  NMR (400 MHz,  $\text{C}_6\text{D}_6$ )  $\delta$  7.71 (dt,  $J = 18.4, 1.8$  Hz, 1H), 7.36 (ddt,  $J = 17.3, 7.7, 1.3$  Hz, 1H), 6.93 (d,  $J = 8.0$  Hz, 1H), 6.60 (q,  $J = 7.7$  Hz, 1H);  $^{13}\text{C}$  NMR (101 MHz,  $\text{C}_6\text{D}_6$ )  $\delta$  136.33 (d,  $J = 154.6$  Hz), 135.14 (d,  $J = 24.8$  Hz), 134.05 (d,  $J = 3.7$  Hz), 130.23 (d,  $J = 20.0$  Hz), 129.78 (d,  $J = 15.2$  Hz), 128.10 (d,  $J = 12.7$  Hz);  $^{31}\text{P}$  NMR (162 MHz,  $\text{C}_6\text{D}_6$ )  $\delta$  30.53.

**(4-(trifluoromethyl)phenyl)phosphonic dichloride (2f)**

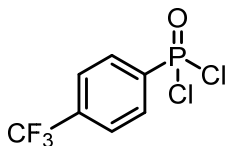

**2f**

Following **General Procedure H**, phosphonic dichloride **2f** was prepared from diethyl (4-(trifluoromethyl)phenyl)phosphonate (113 mg, 0.4 mmol) and used directly without further purification in the catalytic reaction. Analysis of phosphonic dichloride **2f** by  $^1\text{H}$  and  $^{31}\text{P}$ ,  $^{19}\text{F}$ , and  $^{13}\text{C}$  NMR confirmed clean conversion with no remaining starting material or significant byproducts observed.  $^1\text{H}$  NMR (400 MHz,  $\text{C}_6\text{D}_6$ )  $\delta$  7.42 (dd,  $J = 17.4, 8.0$  Hz, 2H), 7.03 (dd,  $J =$

8.2, 5.4 Hz, 2H) ;  $^{13}\text{C}$  NMR (101 MHz,  $\text{C}_6\text{D}_6$ )  $\delta$  137.87 (d,  $J = 154.5$  Hz), 134.91 (qd,  $J = 33.0$ , 4.3 Hz), 130.55 (d,  $J = 14.4$  Hz), 125.59 (dq,  $J = 18.9$ , 3.7 Hz), 123.21 (dd,  $J = 273.2$ , 1.8 Hz) ;  $^{19}\text{F}$  NMR (376 MHz,  $\text{C}_6\text{D}_6$ )  $\delta$  -63.43 ;  $^{31}\text{P}$  NMR (162 MHz,  $\text{C}_6\text{D}_6$ )  $\delta$  30.34.

#### Methyl (*R*)-*N,N*-diisopentyl-*P*-phenylphosphonamidate (**4a**)

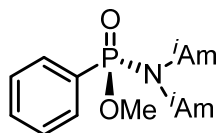

**4a**

Following **General Procedure C**, phosphonamidate **4a** (59 mg, 94% yield, 94% ee) was produced as a colorless oil from phenyl phosphonic dichloride (28  $\mu\text{L}$ , 0.2 mmol). The product was purified by flash chromatography on silica gel (0 to 50%  $\text{Et}_2\text{O}$  in DCM).  $^1\text{H}$  NMR (300 MHz,  $\text{CDCl}_3$ )  $\delta$   $^1\text{H}$  NMR (400 MHz,  $\text{CDCl}_3$ )  $\delta$  7.73 (ddd,  $J = 12.7$ , 8.2, 1.5 Hz, 2H), 7.53 – 7.35 (m, 3H), 3.72 (d,  $J = 11.0$  Hz, 3H), 3.11 – 2.76 (m, 4H), 1.48 (dt,  $J = 13.2$ , 6.6 Hz, 2H), 1.42 – 1.26 (m, 4H), 0.84 (d,  $J = 6.6$  Hz, 12H) ;  $^{13}\text{C}$  NMR (101 MHz,  $\text{CDCl}_3$ )  $\delta$  131.42 (d,  $J = 2.9$  Hz), 131.41 (d,  $J = 9.4$  Hz), 131.23 (d,  $J = 174.9$  Hz), 128.30 (d,  $J = 14.1$  Hz), 50.84 (d,  $J = 5.9$  Hz), 43.26 (d,  $J = 4.6$  Hz), 37.60 (d,  $J = 2.0$  Hz), 26.01, 22.55 (d,  $J = 4.0$  Hz) ;  $^{31}\text{P}$  NMR (162 MHz,  $\text{CDCl}_3$ )  $\delta$  24.89 ; HRMS (ESI)  $m/z$  calcd for  $\text{C}_{17}\text{H}_{31}\text{NO}_2\text{P}$  ( $\text{M}+\text{H}$ ) $^+$ : 312.2087; found: 312.2088. Phosphonamidate **4a** was determined to be 94% ee by chiral HPLC analysis (CHIRALPAK AD-H, 3%  $i\text{PrOH}$ /hexanes, 1.0 mL/min, 230 nm,  $t_{\text{R}}(\text{minor}) = 20.3$  min,  $t_{\text{R}}(\text{major}) = 17.7$  min).

### Racemic sample:

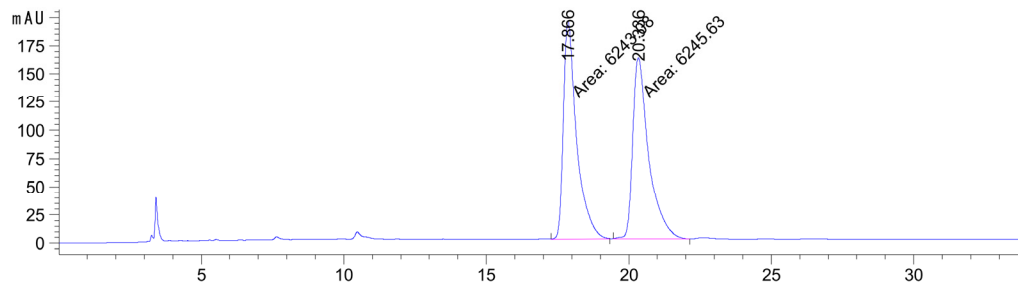

| Peak # | RetTime [min] | Type | Width [min] | Area [mAU*s] | Height [mAU] | Area %  |
|--------|---------------|------|-------------|--------------|--------------|---------|
| 1      | 17.866        | MM   | 0.5371      | 6243.07959   | 193.73647    | 49.9898 |
| 2      | 20.336        | MM   | 0.6483      | 6245.62842   | 160.57492    | 50.0102 |

### Enriched sample:

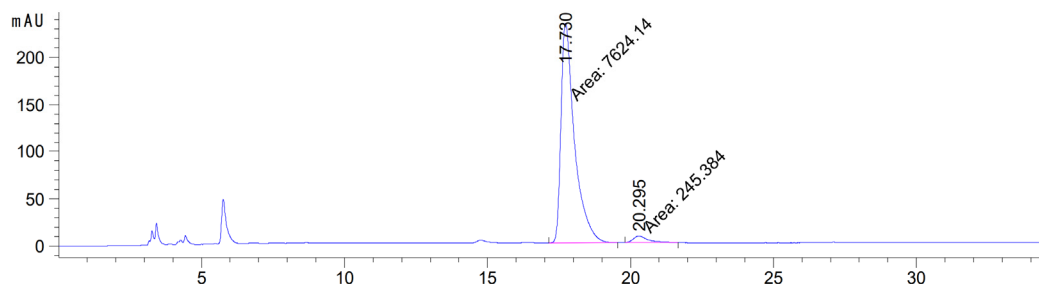

| Peak # | RetTime [min] | Type | Width [min] | Area [mAU*s] | Height [mAU] | Area %  |
|--------|---------------|------|-------------|--------------|--------------|---------|
| 1      | 17.730        | MM   | 0.5462      | 7624.14453   | 232.64314    | 96.8819 |
| 2      | 20.295        | MM   | 0.5946      | 245.38354    | 6.87788      | 3.1181  |

### Methyl (*R*)-*N,N*-diisopentyl-*P*-(naphthalen-2-yl)phosphonamidate (4b)

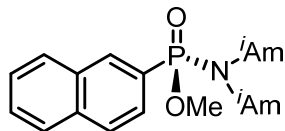

4b

Following **General Procedure C**, phosphoramidate **4b** (62 mg, 85% yield, 95% ee) was produced as a colorless oil from **2b** (0.2 mmol). The product was purified using flash chromatography on silica gel (0 to 100% EtOAc in Hexanes). <sup>1</sup>H NMR (400 MHz, CDCl<sub>3</sub>) δ 8.31 (d, *J* = 14.6 Hz, 1H), 7.89 (dt, *J* = 12.1, 7.5 Hz, 2H), 7.73 (ddd, *J* = 10.3, 8.4, 1.5 Hz, 2H), 7.56 (pd, *J* = 7.0, 1.6 Hz, 2H), 3.77 (d, *J* = 11.1 Hz, 3H), 3.28 – 2.69 (m, 4H), 1.49 (dq, *J* = 13.5, 6.8 Hz, 2H), 1.44 – 1.28 (m, 4H), 0.84 (d, *J* = 6.6 Hz, 12H); <sup>13</sup>C NMR (101 MHz, CDCl<sub>3</sub>) δ 134.57 (d, *J* = 2.6 Hz), 133.08 (d, *J* = 9.1 Hz), 132.53 (d, *J* = 15.4 Hz), 128.82, 128.41 (d, *J* = 174.9 Hz), 128.10 (d, *J* = 13.7 Hz), 127.76, 126.75, 126.66, 126.63 (d, *J* = 1.2 Hz), 50.98 (d, *J* = 5.9 Hz), 43.37 (d, *J* = 4.6 Hz), 37.67 (d, *J* = 2.0 Hz), 26.03, 22.56 (d, *J* = 4.2 Hz); <sup>31</sup>P NMR (162 MHz, CDCl<sub>3</sub>) δ 24.91; HRMS (ESI) *m/z* calcd for C<sub>21</sub>H<sub>33</sub>NO<sub>2</sub>P (M+H)<sup>+</sup>: 362.2243; found: 362.2245. Phosphoramidate **4b** was determined to be 95% ee by chiral HPLC analysis (CHIRALPAK AD-H, 5% iPrOH/hexanes, 1.0 mL/min, 220 nm, *t*<sub>R</sub>(minor) = 23.2 min, *t*<sub>R</sub>(major) = 20.8 min).

### Racemic Sample:

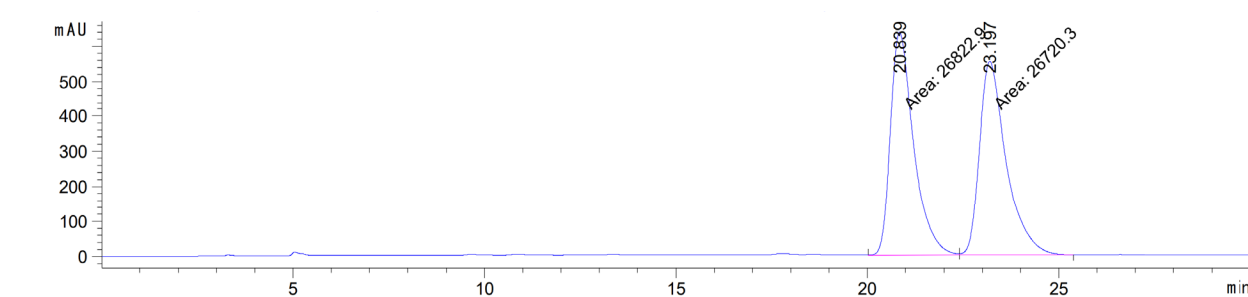

| Peak # | RetTime [min] | Type | Width [min] | Area [mAU*s] | Height [mAU] | Area %  |
|--------|---------------|------|-------------|--------------|--------------|---------|
| 1      | 20.839        | MF   | 0.7028      | 2.68229e4    | 636.09015    | 50.0958 |
| 2      | 23.197        | FM   | 0.8058      | 2.67203e4    | 552.65314    | 49.9042 |

## Enriched Sample:

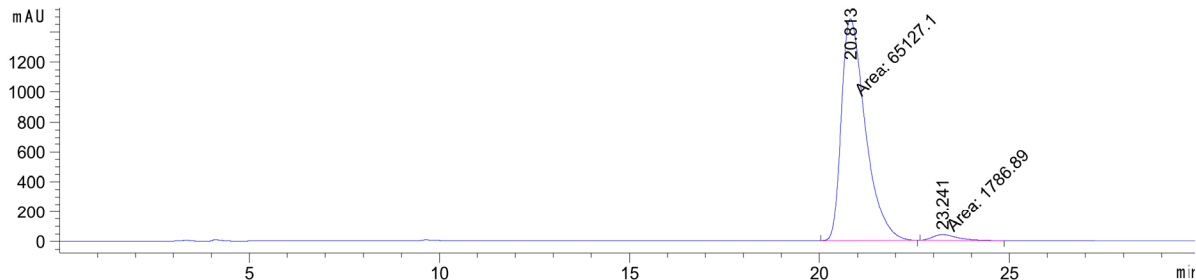

| Peak # | RetTime [min] | Type | Width [min] | Area [mAU*s] | Height [mAU] | Area %  |
|--------|---------------|------|-------------|--------------|--------------|---------|
| 1      | 20.813        | MM   | 0.7331      | 6.51271e4    | 1480.64075   | 97.3296 |
| 2      | 23.241        | MM   | 0.7609      | 1786.88892   | 39.14061     | 2.6704  |

## Methyl (*R*)-*P*-(3-bromophenyl)-*N,N*-diisopentylphosphonamidate (**4c**)

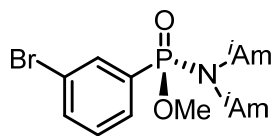

**4c**

Following **General Procedure C**, phosphonamidate **4c** (57.5 mg, 74% yield, 94% ee) was produced as a colorless oil from phosphonic dichloride **2c** (0.2 mmol). The product was purified by flash chromatography on silica gel (0 to 50% Et<sub>2</sub>O in DCM). <sup>1</sup>H NMR (400 MHz, CDCl<sub>3</sub>) δ 7.86 (dt, *J* = 12.9, 1.7 Hz, 1H), 7.69 – 7.55 (m, 2H), 7.31 (td, *J* = 7.8, 4.4 Hz, 1H), 3.73 (d, *J* = 11.2 Hz, 3H), 3.00 (ddd, *J* = 10.4, 8.9, 7.1 Hz, 4H), 1.49 (dq, *J* = 13.1, 6.6 Hz, 2H), 1.34 (ttt, *J* = 12.7, 6.0, 3.4 Hz, 4H), 0.86 (d, *J* = 6.6 Hz, 12H); <sup>13</sup>C NMR (101 MHz, CDCl<sub>3</sub>) δ 134.41 (d, *J* = 2.9 Hz), 134.19 (d, *J* = 10.1 Hz), 134.08 (d, *J* = 173.0 Hz), 130.02 (d, *J* = 15.0 Hz), 129.80 (d, *J* = 8.9 Hz), 122.75 (d, *J* = 18.6 Hz), 50.96 (d, *J* = 6.1 Hz), 43.25 (d, *J* = 4.7 Hz), 37.59 (d, *J* = 1.9 Hz), 26.00, 22.54 (d, *J* = 3.1 Hz); <sup>31</sup>P NMR (162 MHz, CDCl<sub>3</sub>) δ 22.33; HRMS (ESI) *m/z* calcd for C<sub>17</sub>H<sub>30</sub>BrNO<sub>2</sub>P (M+H)<sup>+</sup>: 390.1192; found: 390.1193. Phosphonamidate **4c** was determined to be

94% ee by chiral HPLC analysis (CHIRALPAK AD-H, 3% iPrOH/hexanes, 1.0 mL/min, 230 nm,  
 $t_R(\text{minor}) = 19.9 \text{ min}$ ,  $t_R(\text{major}) = 16.1 \text{ min}$ ).

**Racemic Sample:**

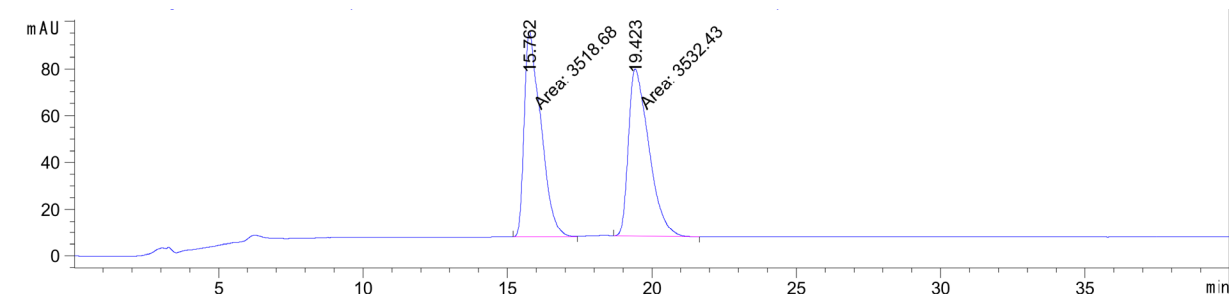

| Peak # | RetTime [min] | Type | Width [min] | Area [mAU*s] | Height [mAU] | Area %  |
|--------|---------------|------|-------------|--------------|--------------|---------|
| 1      | 15.762        | MM   | 0.6677      | 3518.68286   | 87.83620     | 49.9025 |
| 2      | 19.423        | MM   | 0.8226      | 3532.43042   | 71.56898     | 50.0975 |

**Enriched Sample:**

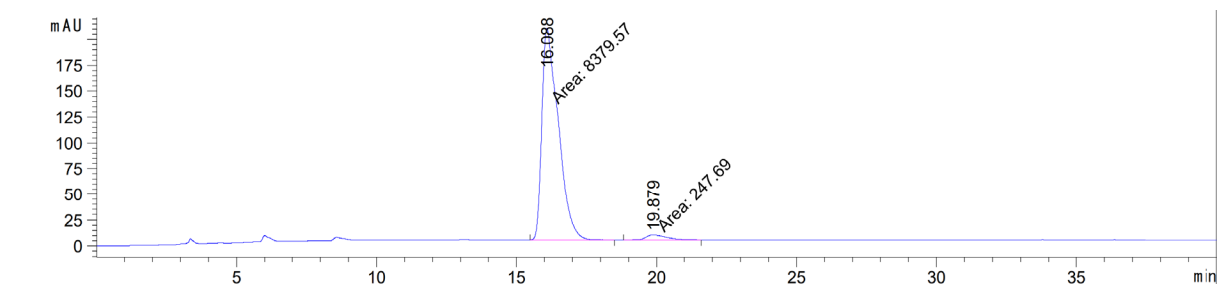

| Peak # | RetTime [min] | Type | Width [min] | Area [mAU*s] | Height [mAU] | Area %  |
|--------|---------------|------|-------------|--------------|--------------|---------|
| 1      | 16.088        | MM   | 0.6801      | 8379.56836   | 205.35091    | 97.1290 |
| 2      | 19.879        | MM   | 0.8337      | 247.69002    | 4.95151      | 2.8710  |



### Methyl (*R*)-*N,N*-diisopentyl-*P*-(3-methoxyphenyl)phosphonamidate (**4d**)

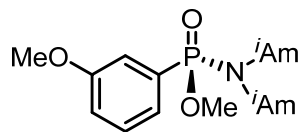

**4d**

Following **General Procedure C**, phosphonamidate **4d** (63 mg, 92% yield, 94% ee) was produced as a colorless oil from **2d** (0.2 mmol). The product was purified by flash chromatography on silica gel (0 to 50% Et<sub>2</sub>O in DCM). <sup>1</sup>H NMR (400 MHz, CDCl<sub>3</sub>) δ 7.38 – 7.20 (m, 3H), 7.01 (ddd, *J* = 8.7, 2.3, 0.9 Hz, 1H), 3.83 (s, 3H), 3.72 (d, *J* = 11.1 Hz, 3H), 3.35 – 2.74 (m, 4H), 1.49 (dq, *J* = 13.1, 6.6 Hz, 4H), 1.41 – 1.28 (m, 2H), 0.85 (d, *J* = 6.5 Hz, 12H); <sup>13</sup>C NMR (101 MHz, CDCl<sub>3</sub>) δ 159.40 (d, *J* = 17.8 Hz), 132.55 (d, *J* = 173.9 Hz), 129.53 (d, *J* = 16.5 Hz), 123.65 (d, *J* = 9.0 Hz), 117.68 (d, *J* = 3.0 Hz), 116.20 (d, *J* = 10.7 Hz), 55.40, 50.92 (d, *J* = 6.0 Hz), 43.27 (d, *J* = 4.7 Hz), 37.59 (d, *J* = 1.9 Hz), 26.02, 22.57 (d, *J* = 4.1 Hz); <sup>31</sup>P NMR (162 MHz, CDCl<sub>3</sub>) δ 24.72; HRMS (ESI) *m/z* calcd for C<sub>18</sub>H<sub>33</sub>NO<sub>3</sub>P (M+H)<sup>+</sup>: 342.2193; found: 342.2193. Phosphonamidate **4d** was determined to be 93% ee by chiral HPLC analysis (CHIRALPAK AD-H, 3% iPrOH/hexanes, 1.0 mL/min, 220 nm, *t*<sub>R</sub>(minor) = 29.7 min, *t*<sub>R</sub>(major) = 23.5 min).

#### Racemic Sample:

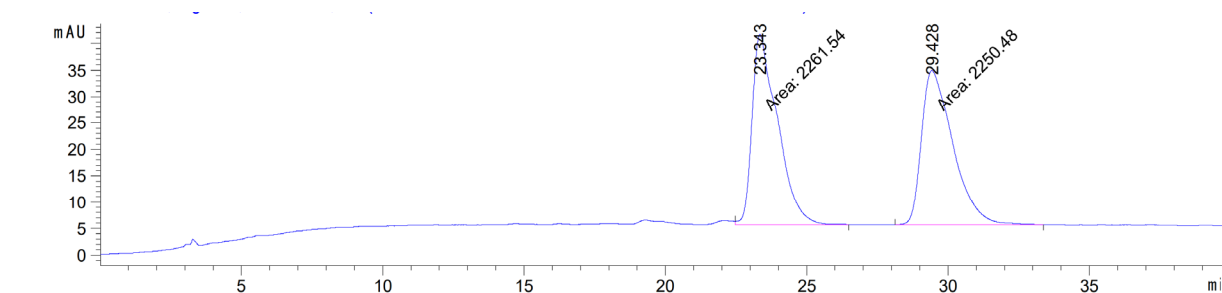

| Peak # | RetTime [min] | Type | Width [min] | Area [mAU*s] | Height [mAU] | Area %  |
|--------|---------------|------|-------------|--------------|--------------|---------|
| 1      | 23.343        | FM   | 1.0472      | 2261.53540   | 35.99278     | 50.1225 |
| 2      | 29.428        | MM   | 1.2840      | 2250.48462   | 29.21214     | 49.8775 |

### Enriched Sample:

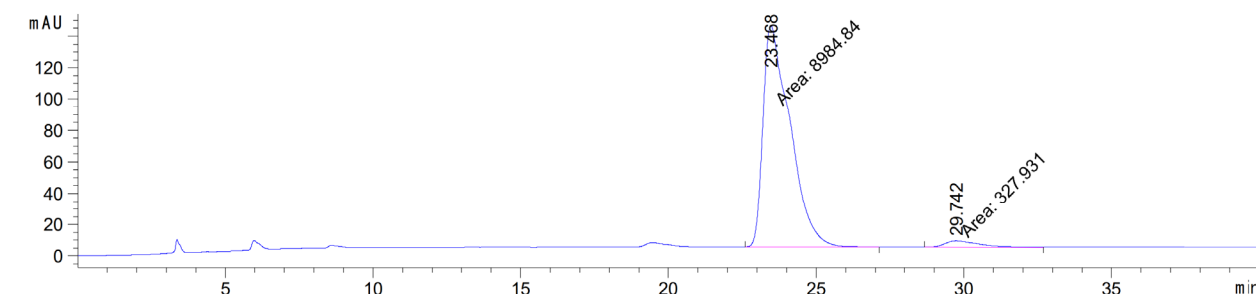

| Peak # | RetTime [min] | Type | Width [min] | Area [mAU*s] | Height [mAU] | Area %  |
|--------|---------------|------|-------------|--------------|--------------|---------|
| 1      | 23.468        | MM   | 1.0602      | 8984.83594   | 141.24014    | 96.4787 |
| 2      | 29.742        | MM   | 1.3275      | 327.93115    | 4.11700      | 3.5213  |

### Methyl (*R*)-*P*-(3-chlorophenyl)-*N,N*-diisopentylphosphoramidate (**4b**)

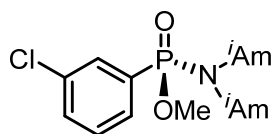

**4e**

Following **General Procedure C**, phosphoramidate **4e** (63 mg, 87% yield, 89% ee) was produced as a colorless oil from phosphonic dichloride **2e** (0.2 mmol). Product was purified by flash chromatography on silica gel (0 to 50% Et<sub>2</sub>O in DCM). <sup>1</sup>H NMR (300 MHz, CDCl<sub>3</sub>) δ 7.71 (dt, *J* = 13.0, 1.8 Hz, 1H), 7.61 (ddt, *J* = 12.4, 7.5, 1.3 Hz, 1H), 7.45

(ddt,  $J = 8.1, 2.2, 1.1$  Hz, 1H), 7.37 (td,  $J = 7.7, 4.3$  Hz, 1H), 3.73 (d,  $J = 11.1$  Hz, 3H), 3.00 (dddd,  $J = 10.8, 8.7, 6.7, 1.5$  Hz, 4H), 1.49 (dq,  $J = 13.1, 6.6$  Hz, 2H), 1.34 (dddd,  $J = 19.2, 12.8, 8.7, 6.1$  Hz, 4H), 0.86 (d,  $J = 6.6$  Hz, 12H);  $\delta^{13}\text{C}$  NMR (101 MHz,  $\text{CDCl}_3$ )  $\delta$  134.66 (d,  $J = 7.1$  Hz), 133.71 (d,  $J = 162.1$  Hz), 131.50 (d,  $J = 2.9$  Hz), 131.33 (d,  $J = 10.0$  Hz), 129.78 (d,  $J = 15.4$  Hz), 129.37 (d,  $J = 8.9$  Hz), 50.95 (d,  $J = 6.0$  Hz), 43.25 (d,  $J = 4.7$  Hz), 37.59 (d,  $J = 1.9$  Hz), 26.00, 22.54 (d,  $J = 3.3$  Hz);  $^{31}\text{P}$  NMR (162 MHz,  $\text{CDCl}_3$ )  $\delta$  22.63; HRMS (ESI)  $m/z$  calcd for  $\text{C}_{17}\text{H}_{30}\text{ClNO}_2\text{P}$  ( $\text{M}+\text{H}$ ) $^+$ : 346.1697; found: 346.1698. Phosphoramidate **4e** was determined to be 94% ee by chiral HPLC analysis (CHIRALPAK AD-H, 3% iPrOH/hexanes, 1.0 mL/min, 230 nm,  $t_{\text{R}}$ (minor) = 19.2 min,  $t_{\text{R}}$ (major) = 15.2 min).

#### Racemic sample:

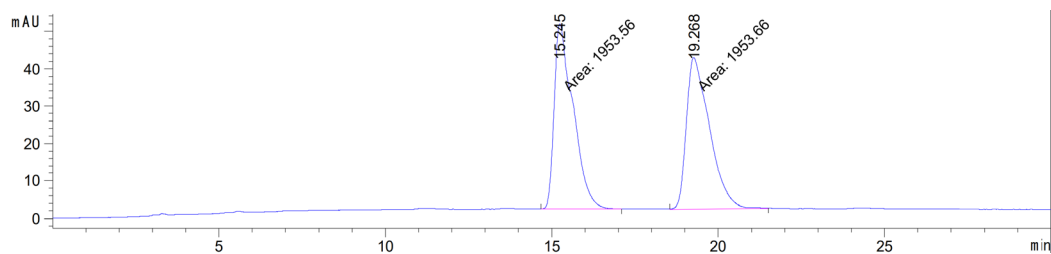

| Peak # | RetTime [min] | Type | Width [min] | Area [mAU*s] | Height [mAU] | Area %  |
|--------|---------------|------|-------------|--------------|--------------|---------|
| 1      | 15.245        | MM   | 0.6579      | 1953.55896   | 49.49269     | 49.9987 |
| 2      | 19.268        | MM   | 0.8041      | 1953.65906   | 40.49458     | 50.0013 |

#### Enriched sample:

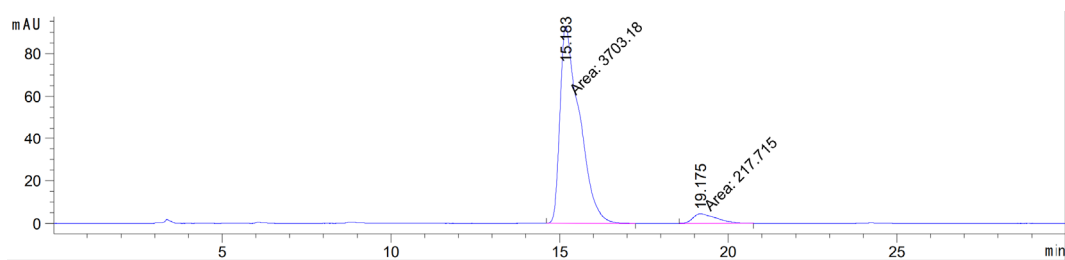

| Peak # | RetTime [min] | Type | Width [min] | Area [mAU*s] | Height [mAU] | Area %  |
|--------|---------------|------|-------------|--------------|--------------|---------|
| 1      | 15.183        | MM   | 0.6660      | 3703.18311   | 92.66764     | 94.4473 |
| 2      | 19.175        | MM   | 0.8050      | 217.71455    | 4.50762      | 5.5527  |

**Methyl (*R*)-*N,N*-diisopentyl-*P*-(4-(trifluoromethyl)phenyl)phosphonamidate (**4f**)**

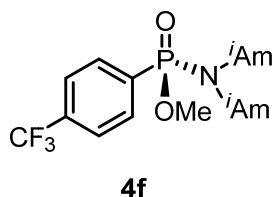

An oven-dried 40 mL vial equipped with a magnetic stir bar was charged with catalyst **1a** (20 mg, 0.04 mmol, 0.2 equiv.), 4 Å mol sieves (200 mg), and diisoamylamine (140 µL, 0.7 mmol, 3.5 equiv.). The vial was then capped with a septum and put under N<sub>2</sub> atmosphere. The vial was charged with diethyl ether (10 mL), and the reaction mixture was cooled to -78 °C and subjected to stirring at that temperature for 20 minutes. Phosphonic dichloride **2f** (0.2 mmol, 1 equiv.) dissolved in toluene (0.5 mL) was then added in one portion, and the reaction was subjected to stirring at -78 °C for 18 hours.

A separate oven-dried 2-dram vial with a magnetic stir bar was charged with 80 mg of sodium hydride (2 mmol, 10 equiv., 60% in mineral oil). The vial was then capped with a septum, sealed with parafilm, and put under N<sub>2</sub> atmosphere. The vial was then charged with THF (1.5 mL) and allowed to stir at room temperature for 1 minute. Methanol (0.5 mL) was then added dropwise via a syringe through the septum to the stirring sodium hydride mixture over a 2-minute period, and the solution was subjected to stirring at room temperature until clear. If the mixture remained

cloudy after 10 minutes, additional methanol (0.1 mL) was introduced to ensure complete dissolution of sodium methoxide. The resultant sodium methoxide solution was then added directly to the catalytic reaction at  $-78\text{ }^{\circ}\text{C}$  after it had been stirred for 24 hours. The reaction was then subjected to stirring for 12 hours at  $-50\text{ }^{\circ}\text{C}$ , after which point it was concentrated under reduced pressure and purified by flash column chromatography on silica gel (0 to 50% Et<sub>2</sub>O in DCM) to afford the product. Phosphoramidate **4f** (76 mg, 89% yield, 92% ee) was afforded as a colorless oil. <sup>1</sup>H NMR (400 MHz, CDCl<sub>3</sub>)  $\delta$  7.86 (dd,  $J = 12.3, 7.9$  Hz, 2H), 7.69 (dd,  $J = 8.1, 3.2$  Hz, 2H), 3.74 (d,  $J = 11.1$  Hz, 3H), 3.18 – 2.80 (m, 4H), 1.56 – 1.23 (m, 6H), 0.85 (dd,  $J = 6.6, 1.0$  Hz, 12H); <sup>13</sup>C NMR (101 MHz, CDCl<sub>3</sub>)  $\delta$  135.86 (d,  $J = 173.0$  Hz), 133.13 (qd,  $J = 32.6, 3.2$  Hz), 131.77 (d,  $J = 9.5$  Hz), 125.14 (dq,  $J = 14.2, 3.7$  Hz), 123.70 (q,  $J = 818.0$  Hz), 50.94 (d,  $J = 5.9$  Hz), 43.24 (d,  $J = 4.7$  Hz), 37.57 (d,  $J = 1.8$  Hz), 25.99, 22.50 (d,  $J = 3.1$  Hz); <sup>31</sup>P NMR (162 MHz, CDCl<sub>3</sub>)  $\delta$  22.33; <sup>19</sup>F NMR (376 MHz, CDCl<sub>3</sub>)  $\delta$  -63.13; HRMS (ESI)  $m/z$  calcd for C<sub>18</sub>H<sub>30</sub>F<sub>3</sub>NO<sub>2</sub>P (M+H)<sup>+</sup>: 380.1961; found: 380.1960. Phosphoramidate **4f** was determined to be 92% ee by chiral HPLC analysis (CHIRALPAK AD-H, 3% iPrOH/hexanes, 1.0 mL/min, 220 nm,  $t_R(\text{minor}) = 15.5$  min,  $t_R(\text{major}) = 18.0$  min).

### Racemic Sample:

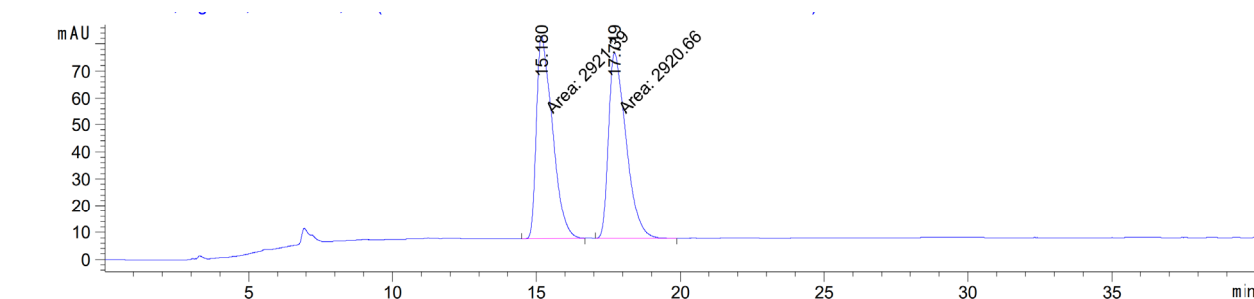

| Peak # | RetTime [min] | Type | Width [min] | Area [mAU*s] | Height [mAU] | Area %  |
|--------|---------------|------|-------------|--------------|--------------|---------|
| 1      | 15.180        | MM   | 0.6453      | 2921.39429   | 75.45140     | 50.0063 |
| 2      | 17.719        | MM   | 0.7071      | 2920.65942   | 68.84431     | 49.9937 |

### Enriched Sample:

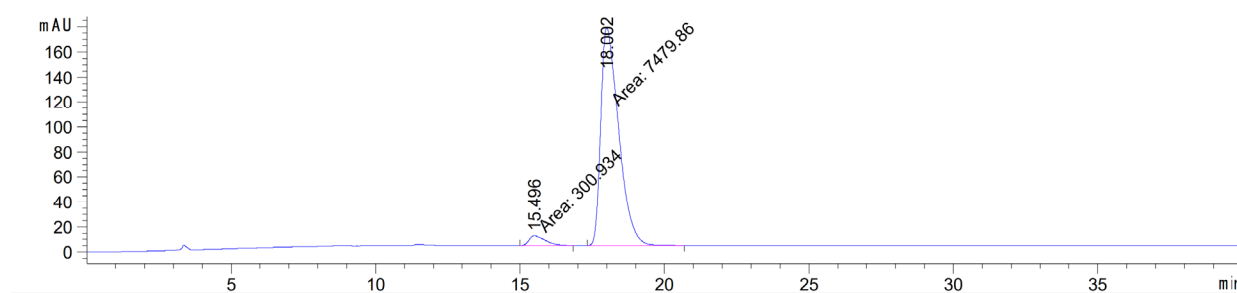

| Peak # | RetTime [min] | Type | Width [min] | Area [mAU*s] | Height [mAU] | Area %  |
|--------|---------------|------|-------------|--------------|--------------|---------|
| 1      | 15.496        | MM   | 0.6362      | 300.93442    | 7.88329      | 3.8677  |
| 2      | 18.002        | MM   | 0.7159      | 7479.85596   | 174.13049    | 96.1323 |

### Methyl (*R*)-*N,N*-diisopentyl-*P*-(4-methoxyphenyl)phosphonamidate (**4g**)

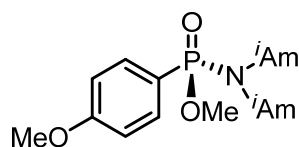

**4g**

An oven-dried 40 mL vial equipped with a magnetic stir bar was charged with catalyst **1a** (5 mg, 0.01 mmol, 0.05 equiv.), 4 Å mol sieves (200 mg), and diisoamylamine (140 μL, 0.7 mmol, 3.5 equiv.). The vial was then capped with a septum, sealed with parafilm, and put under N<sub>2</sub> atmosphere. The vial was charged with diethyl ether (10 mL), and the reaction mixture was cooled to -40 °C and subjected to stirring at that temperature for 20 minutes. 4-methoxyphenyl

phosphonic dichloride (32  $\mu$ L, 0.2 mmol, 1 equiv.) dissolved in toluene (0.5 mL) was then added in one portion, and the reaction was subjected to stirring at  $-40$   $^{\circ}$ C for 24 hours.

A separate oven-dried 2-dram vial with a magnetic stir bar was charged with sodium hydride (80 mg, 2 mmol, 10 equiv., 60% in mineral oil). The vial was then capped with a septum, sealed with parafilm, and put under  $N_2$  atmosphere. The vial was then charged with THF (1.5 mL) and allowed to stir at room temperature for 1 minute. Methanol (0.5 mL) was then added dropwise via a syringe through the septum to the stirring sodium hydride mixture over a 2-minute period, and the solution was subjected to stirring at room temperature until clear. If the mixture remained cloudy after 10 minutes, additional methanol (0.1 mL) was introduced to ensure complete dissolution of sodium methoxide. The resultant sodium methoxide solution was then added directly to the catalytic reaction at  $-40$   $^{\circ}$ C after it had been stirred for 24 hours. The reaction was then subjected to stirring for 12 hours at  $-40$   $^{\circ}$ C, after which point it was concentrated under reduced pressure and purified by flash column chromatography on silica gel (0 to 100% Et<sub>2</sub>O in DCM) to afford the product. Phosphonamidate **4g** (63 mg, 92% yield, 90% ee) was afforded as a colorless oil.

$^1H$  NMR (400 MHz, CDCl<sub>3</sub>)  $\delta$  7.77 – 7.51 (m, 2H), 6.93 (dd,  $J$  = 8.8, 3.0 Hz, 2H), 3.84 (s, 3H), 3.69 (d,  $J$  = 11.0 Hz, 3H), 3.09 – 2.89 (m, 4H), 1.54 – 1.41 (m, 2H), 1.34 (ddt,  $J$  = 16.2, 12.9, 6.3 Hz, 4H), 0.85 (d,  $J$  = 6.5 Hz, 12H);  $^{13}C$  NMR (101 MHz, CDCl<sub>3</sub>)  $\delta$  162.08 (d,  $J$  = 3.2 Hz), 133.35 (d,  $J$  = 10.8 Hz), 122.53 (d,  $J$  = 181.8 Hz), 113.80 (d,  $J$  = 15.2 Hz), 55.28, 50.80 (d,  $J$  = 6.0 Hz), 43.29 (d,  $J$  = 4.7 Hz), 37.64 (d,  $J$  = 2.0 Hz), 26.03, 22.58 (d,  $J$  = 4.8 Hz);  $^{31}P$  NMR (162 MHz, CDCl<sub>3</sub>)  $\delta$  25.71; HRMS (ESI)  $m/z$  calcd for C<sub>18</sub>H<sub>33</sub>NO<sub>3</sub>P (M+H)<sup>+</sup>: 342.2193; found: 342.2193. Phosphonamidate **4g** was determined to be 90% ee by chiral HPLC analysis (Chiralcel OD-H, 3% iPrOH/hexanes, 1.0 mL/min, 230 nm,  $t_R$ (minor) = 26.2 min,  $t_R$ (major) = 18.2 min).

### Racemic Sample:

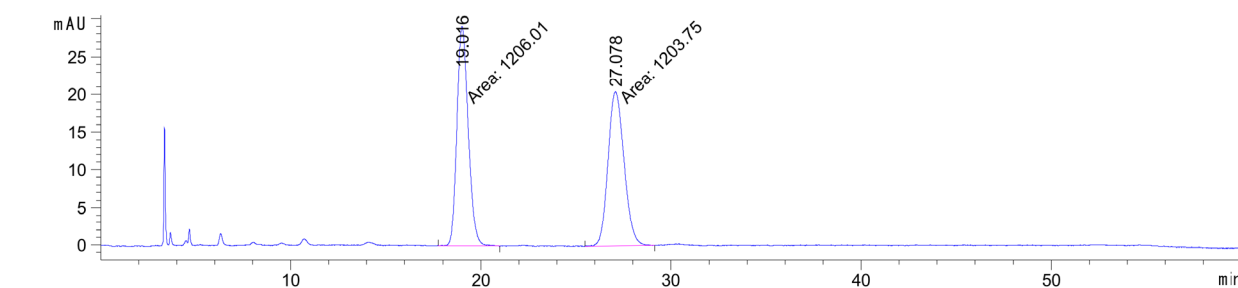

| Peak # | RetTime [min] | Type | Width [min] | Area [mAU*s] | Height [mAU] | Area %  |
|--------|---------------|------|-------------|--------------|--------------|---------|
| 1      | 19.016        | MM   | 0.6900      | 1206.00720   | 29.12862     | 50.0469 |
| 2      | 27.078        | MM   | 0.9805      | 1203.74585   | 20.46228     | 49.9531 |

### Enriched Sample:

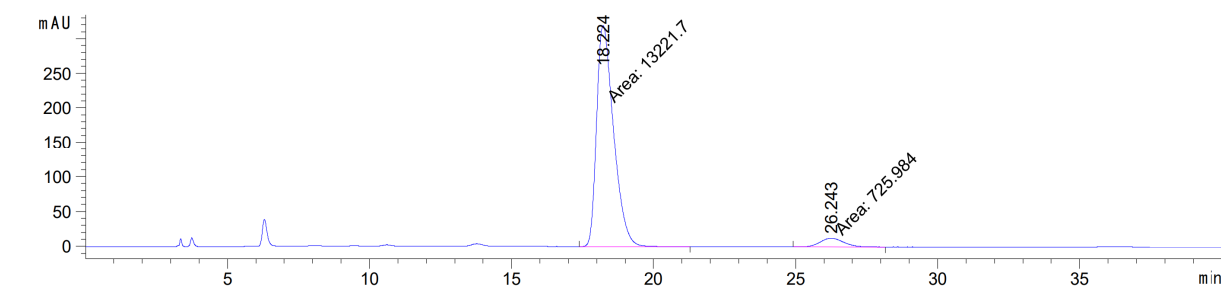

| Peak # | RetTime [min] | Type | Width [min] | Area [mAU*s] | Height [mAU] | Area %  |
|--------|---------------|------|-------------|--------------|--------------|---------|
| 1      | 18.224        | MM   | 0.6904      | 1.32217e4    | 319.17303    | 94.7950 |
| 2      | 26.243        | MM   | 0.9627      | 725.98444    | 12.56860     | 5.2050  |



### Methyl (*R*)-*P*-hexyl-*N,N*-diisopentylphosphonamidate (**4h**)

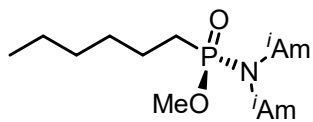

**4h**

Following **General Procedure C**, phosphonamidate **4h** (32.1 mg, 50% yield, 26% ee) was produced as a colorless oil from hexylphosphonic dichloride (34  $\mu$ L, 0.2 mmol). Product **4h** was purified by flash chromatography on silica gel (0 to 60% Et<sub>2</sub>O in Hexanes).

<sup>1</sup>H NMR (400 MHz, CDCl<sub>3</sub>)  $\delta$  3.55 (d,  $J$  = 10.9 Hz, 3H), 2.97 (td,  $J$  = 10.1, 6.5 Hz, 4H), 1.75 – 1.48 (m, 6H), 1.45 – 1.31 (m, 6H), 1.35 – 1.19 (m, 4H), 0.91 (d,  $J$  = 6.6 Hz, 12H), 0.88 (t,  $J$  = 6.9 Hz, 3H); <sup>13</sup>C NMR (101 MHz, CDCl<sub>3</sub>)  $\delta$  49.72 (d,  $J$  = 6.9 Hz), 42.96 (d,  $J$  = 4.3 Hz), 37.88 (d,  $J$  = 1.7 Hz), 31.40, 30.55 (d,  $J$  = 17.2 Hz), 26.53 (d,  $J$  = 131.1 Hz), 26.15, 22.64, 22.46, 22.35 (d,  $J$  = 4.1 Hz), 14.04; <sup>31</sup>P NMR (162 MHz, CDCl<sub>3</sub>)  $\delta$  37.97; HRMS (ESI)  $m/z$  calcd for C<sub>17</sub>H<sub>39</sub>N<sub>1</sub>O<sub>2</sub>P<sub>1</sub> (M+H)<sup>+</sup>: 320.2713; found: 320.2712.

Phosphonamidate **4h** was determined to be 26% ee by chiral GC analysis (Cyclodex B 60 m x 0.25 mm x 0.25  $\mu$ m, 1.0  $^{\circ}$ C/min, 100  $^{\circ}$ C to 200  $^{\circ}$ C, 7 psi),  $t_R$ (minor) = 33.1 min,  $t_R$ (major) = 31.4 min.

#### Racemic Sample:

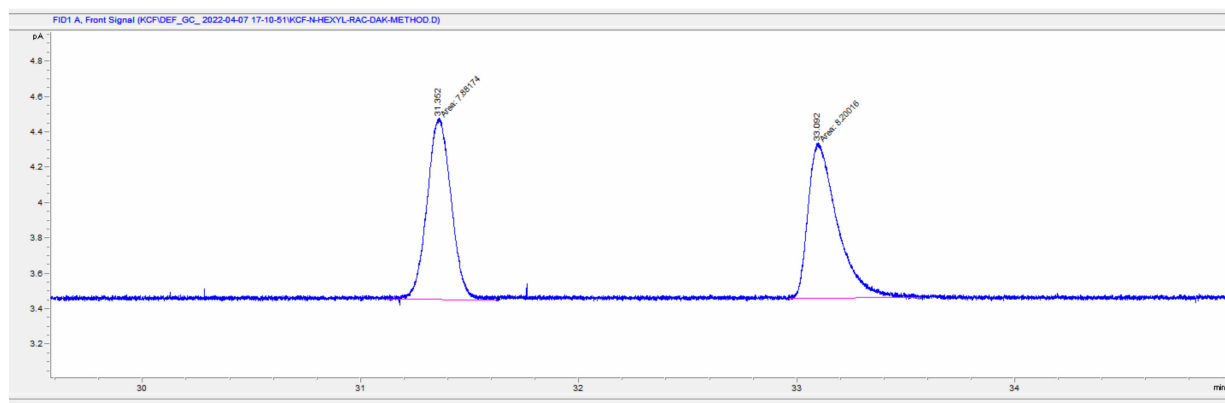

| Peak # | RetTime [min] | Type | Width [min] | Area [pA*s] | Height [pA] | Area %   |
|--------|---------------|------|-------------|-------------|-------------|----------|
| 1      | 31.352        | MM   | 0.1289      | 7.88174     | 1.01915     | 49.01002 |
| 2      | 33.092        | MM   | 0.1565      | 8.20016     | 8.73491e-1  | 50.98998 |

**Enriched Sample:**

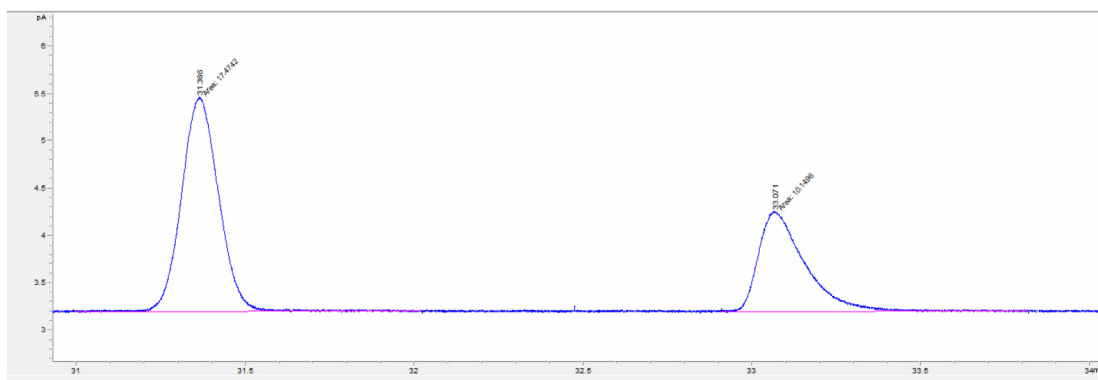

| Peak # | RetTime [min] | Type | Width [min] | Area [pA*s] | Height [pA] | Area %   |
|--------|---------------|------|-------------|-------------|-------------|----------|
| 1      | 31.366        | MM   | 0.1286      | 17.47416    | 2.26527     | 63.25772 |
| 2      | 33.071        | MM   | 0.1606      | 10.14960    | 1.05304     | 36.74228 |

## Scope of enantiospecific nucleophile substitution of phenyl chlorophosphonamidate **3** by various nucleophiles

### 4-(*N,N*-dimethylsulfamoyl)phenyl (*R*)-*N,N*-diisopentyl-*P*-phenylphosphonamidate (**5a**)

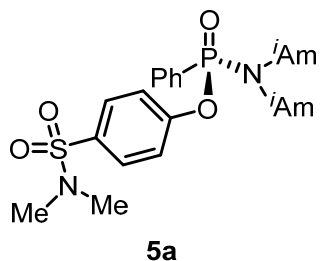

Following **General Procedure B**, phosphonamidate **5a** (70 mg, 73% yield, 94% ee) was produced as a white solid from phenyl phosphonic dichloride (28  $\mu$ L, 0.2 mmol), sodium hydride (48 mg, 1.2 mmol, 6 equiv., 60% in mineral oil), and 4-hydroxy-*N,N*-dimethylbenzenesulfonamide (81 mg, 0.4 mmol, 2 equiv.). *NOTE: after addition of phenoxide solution, reaction was subjected to stirring at  $-30$  °C instead of  $-50$  °C.* The product was purified via flash chromatography on silica gel (0 to 100% Et<sub>2</sub>O in DCM). <sup>1</sup>H NMR (400 MHz, CDCl<sub>3</sub>)  $\delta$  7.89 – 7.77 (m, 2H), 7.78 – 7.66 (m, 2H), 7.62 – 7.53 (m, 1H), 7.49 (tdd,  $J$  = 7.0, 3.1, 1.8 Hz, 2H), 7.46 – 7.39 (m, 2H), 3.24 – 2.94 (m, 4H), 2.69 (s, 6H), 1.44 (h,  $J$  = 6.6 Hz, 2H), 1.37 – 1.17 (m, 4H), 0.81 (d,  $J$  = 6.6 Hz, 12H); <sup>13</sup>C NMR (101 MHz, CDCl<sub>3</sub>)  $\delta$  154.94 (d,  $J$  = 7.6 Hz), 132.22 (d,  $J$  = 3.3 Hz), 131.50 (d,  $J$  = 9.9 Hz), 131.04 (d,  $J$  = 1.7 Hz), 129.68, 128.64 (d,  $J$  = 14.8 Hz), 128.46 (d,  $J$  = 164.2 Hz), 120.81 (d,  $J$  = 5.3 Hz), 43.16 (d,  $J$  = 4.5 Hz), 37.94, 37.27 (d,  $J$  = 2.2 Hz), 25.92, 22.50 (d,  $J$  = 7.7 Hz); <sup>31</sup>P NMR (162 MHz, CDCl<sub>3</sub>)  $\delta$  22.44; HRMS (ESI)  $m/z$  calcd for C<sub>24</sub>H<sub>38</sub>N<sub>2</sub>O<sub>4</sub>P (M+H)<sup>+</sup>: 481.2284; found: 481.2282. Phosphonamidate **5a** was determined to be 94% ee by chiral HPLC analysis (CHIRALPAK AD-H, 10% iPrOH/hexanes, 1.0 mL/min, 210 nm,  $t_R$ (minor) = 46.9 min,  $t_R$ (major) = 41.8 min).

### Enriched Sample:

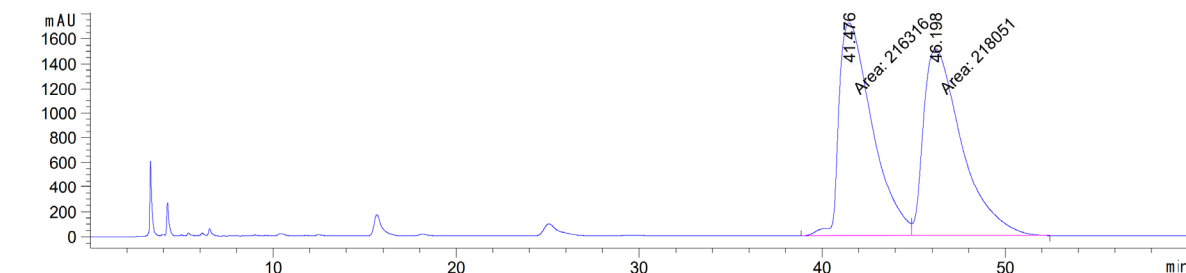

| Peak # | RetTime [min] | Type | Width [min] | Area [mAU*s] | Height [mAU] | Area %  |
|--------|---------------|------|-------------|--------------|--------------|---------|
| 1      | 41.476        | MF   | 2.1002      | 2.16316e5    | 1716.62000   | 49.8002 |
| 2      | 46.198        | FM   | 2.4101      | 2.18051e5    | 1507.92786   | 50.1998 |

### Racemic Sample:

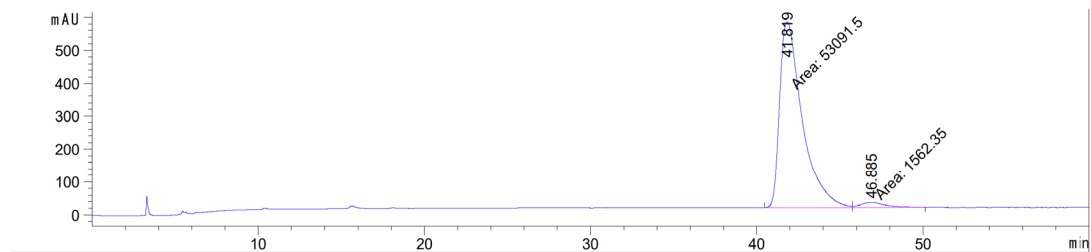

| Peak # | RetTime [min] | Type | Width [min] | Area [mAU*s] | Height [mAU] | Area %  |
|--------|---------------|------|-------------|--------------|--------------|---------|
| 1      | 41.819        | MF   | 1.5668      | 5.30915e4    | 564.75763    | 97.1414 |
| 2      | 46.885        | FM   | 1.7079      | 1562.35327   | 15.24649     | 2.8586  |

### 4-(trifluoromethyl)phenyl (R)-N,N-diisopentyl-P-phenylphosphonamidate (5b)

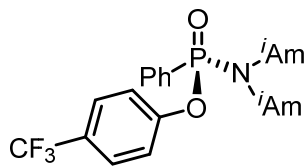

**5b**

An oven-dried 100 mL round-bottomed flask equipped with a magnetic stir bar was charged with catalyst **1a** (23 mg, 0.045 mmol), 4 Å mol sieves (800 mg), and diisoamylamine (0.65 mL, 3.15 mmol, 3.5 equiv.). The vial was then capped with a septum, sealed with parafilm, and put under N<sub>2</sub> atmosphere. The vial was charged with diethyl ether (45 mL), and the reaction mixture was cooled to –50 °C and subjected to stirring for 20 minutes. Phenyl phosphonic dichloride (126 µL, 0.9 mmol, 1 equiv.) dissolved in toluene (1 mL) was then added in one portion, and the reaction was subjected to stirring at –50 °C for 4 hours.

A separate oven-dried 2-dram vial with a magnetic stir bar was charged with sodium hydride (0.54 g, 15 equiv, 13.5 mmol, 60% in mineral oil). The vial was then capped with a septum, sealed with parafilm, and put under N<sub>2</sub> atmosphere. The vial was then charged with THF (9 mL) and allowed to stir at room temperature for 1 minute. 4-(trifluoromethyl)phenol (729 mg, 4.5 mmol, 5 equiv.) dissolved in THF (1 mL) was then added dropwise via a syringe through the septum to the stirring sodium hydride mixture over a 5-minute period, and stirring was continued at room temperature for 30 minutes. The resultant 4-(trifluoromethyl)phenoxide mixture was then added directly to the catalytic reaction at –50 °C after it had been stirred for 4 hours. The reaction was then subjected to stirring for 24 hours at –50 °C, concentrated under reduced pressure, and purified by flash column chromatography on silica gel (0 to 40% Et<sub>2</sub>O in Hexanes) to afford the product. Phosphoramidate **5b** (251 mg, 63% yield, 93% ee) was afforded as a colorless oil. <sup>1</sup>H NMR (400 MHz, CDCl<sub>3</sub>) δ 7.95 – 7.73 (m, 2H), 7.58 (d, *J* = 8.5 Hz, 2H), 7.54 (dd, *J* = 7.4, 1.6 Hz, 1H), 7.48 (ddd, *J* = 8.5, 6.5, 4.2 Hz, 2H), 7.39 (d, *J* = 8.4 Hz, 2H), 3.06 (dddd, *J* = 11.4, 8.9, 6.4, 2.0 Hz, 4H), 1.49 – 1.36 (m, 2H), 1.34 – 1.11 (m, 4H), 0.80 (d, *J* = 6.6 Hz, 12H); <sup>13</sup>C NMR (101 MHz, CDCl<sub>3</sub>) δ 153.98 (d, *J* = 7.6 Hz), 132.07 (d, *J* = 3.1 Hz), 131.53 (d, *J* = 9.6 Hz), 130.41 (d, *J* = 179.1 Hz), 128.56 (d, *J* = 14.8 Hz), 126.95 (q, *J* = 3.8 Hz), 126.47 (q, *J* = 32.9 Hz), 124.02 (q, *J* = 271.7 Hz),

120.78 (d,  $J = 5.1$  Hz), 43.10 (d,  $J = 4.6$  Hz), 37.23 (d,  $J = 2.1$  Hz), 25.91, 22.47 (d,  $J = 8.2$  Hz) ;  $^{31}\text{P}$  NMR (162 MHz,  $\text{CDCl}_3$ )  $\delta$  22.16 ;  $^{19}\text{F}$  NMR (376 MHz,  $\text{CDCl}_3$ )  $\delta$  -62.04 ; HRMS (ESI)  $m/z$  calcd for  $\text{C}_{23}\text{H}_{32}\text{F}_3\text{NO}_2\text{P}$  ( $\text{M}+\text{H}$ ) $^+$ : 442.2117; found: 442.2117. Phosphoramidate **5b** was determined to be 93% ee by chiral HPLC analysis (CHIRALPAK AD-H, 5% iPrOH/hexanes, 1.0 mL/min, 220 nm,  $t_{\text{R}}(\text{minor}) = 27.4$  min,  $t_{\text{R}}(\text{major}) = 32.8$  min).

### Racemic Sample:

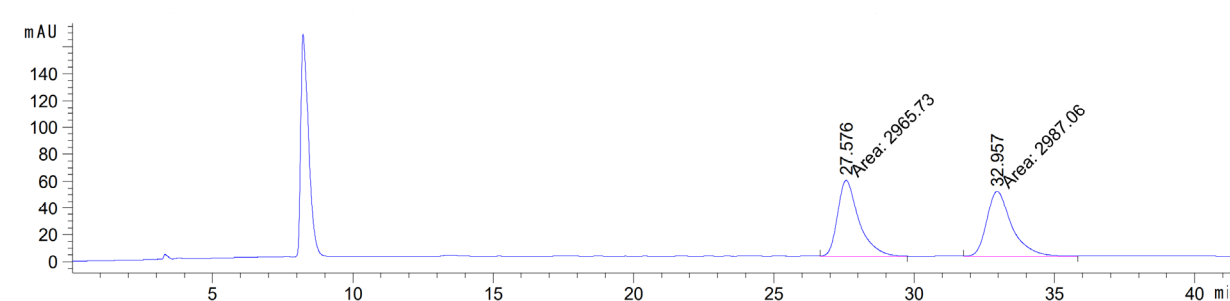

| Peak # | RetTime [min] | Type | Width [min] | Area [mAU*s] | Height [mAU] | Area %  |
|--------|---------------|------|-------------|--------------|--------------|---------|
| 1      | 27.576        | MM   | 0.8733      | 2965.72803   | 56.60071     | 49.8209 |
| 2      | 32.957        | MM   | 1.0233      | 2987.05566   | 48.64917     | 50.1791 |

### Enriched Sample:

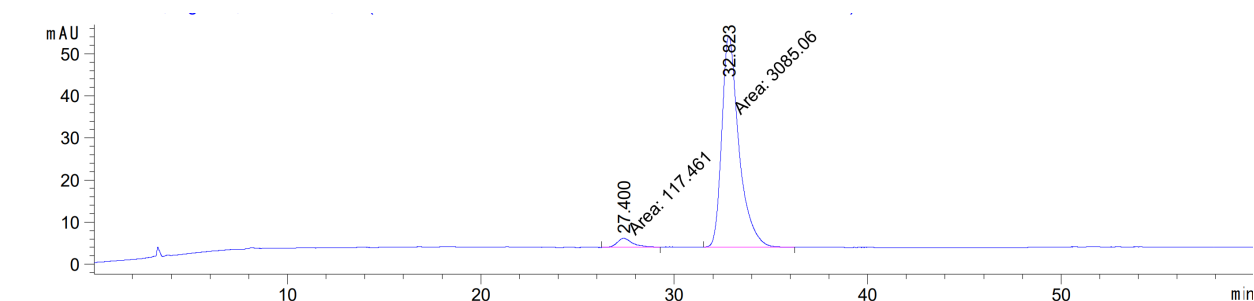

| Peak # | RetTime [min] | Type | Width [min] | Area [mAU*s] | Height [mAU] | Area %  |
|--------|---------------|------|-------------|--------------|--------------|---------|
| 1      | 27.400        | MM   | 0.9142      | 117.46119    | 2.14139      | 3.6678  |
| 2      | 32.823        | MM   | 1.0238      | 3085.05737   | 50.22353     | 96.3322 |

### Phenyl (*R*)-*N,N*-diisopentyl-*P*-phenylphosphonamidate (**5c**)

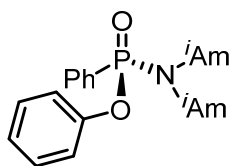

**5c**

Following **General Procedure B**, phosphonamidate **5c** (64 mg, 86% yield, 93% ee) was produced as a colorless oil from phenyl phosphonic dichloride (28  $\mu$ L, 0.2 mmol), sodium hydride (48 mg, 1.2 mmol, 6 equiv., 60% in mineral oil), and phenol (38 mg, 0.4 mmol, 2 equiv.). The product was purified via flash chromatography on silica gel (0 to 50% Et<sub>2</sub>O in Hexanes). <sup>1</sup>H NMR (400 MHz, CDCl<sub>3</sub>)  $\delta$  7.92 – 7.76 (m, 2H), 7.61 – 7.38 (m, 3H), 7.38 – 7.20 (m, 4H), 7.16 – 7.03 (m, 1H), 3.05 (dddd,  $J$  = 10.9, 8.7, 6.5, 1.5 Hz, 4H), 1.54 – 1.34 (m, 2H), 1.34 – 1.00 (m, 4H), 0.79 (d,  $J$  = 6.6 Hz, 12H) ; <sup>13</sup>C NMR (101 MHz, CDCl<sub>3</sub>)  $\delta$  151.23 (d,  $J$  = 8.2 Hz), 131.70 (d,  $J$  = 3.0 Hz), 131.58 (d,  $J$  = 9.5 Hz), 131.15 (d,  $J$  = 179.2 Hz), 129.53, 128.39 (d,  $J$  = 14.5 Hz), 124.21, 120.54 (d,  $J$  = 5.0 Hz), 43.11 (d,  $J$  = 4.4 Hz), 37.20 (d,  $J$  = 2.1 Hz), 25.95, 22.51 (d,  $J$  = 7.6 Hz) ; <sup>31</sup>P NMR (162 MHz, CDCl<sub>3</sub>)  $\delta$  21.20 ; HRMS (ESI)  $m/z$  calcd for C<sub>22</sub>H<sub>33</sub>NO<sub>2</sub>P (M+H)<sup>+</sup>: 374.2243; found: 374.2242. Phosphonamidate **5c** was determined to be 93% ee by chiral HPLC analysis (CHIRALPAK AD-H, 5% iPrOH/hexanes, 1.0 mL/min, 220 nm,  $t_R$ (minor) = 26.6 min,  $t_R$ (major) = 21.1 min).

### Racemic Sample:

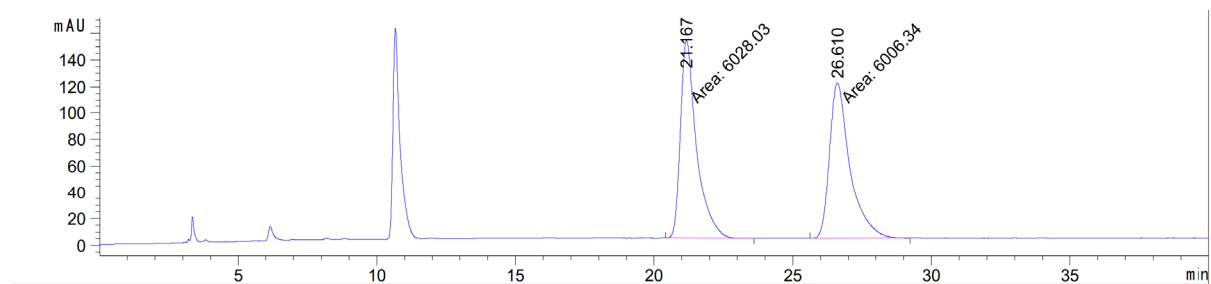

| Peak # | RetTime [min] | Type | Width [min] | Area [mAU*s] | Height [mAU] | Area %  |
|--------|---------------|------|-------------|--------------|--------------|---------|
| 1      | 21.167        | MM   | 0.6734      | 6028.03271   | 149.20413    | 50.0901 |
| 2      | 26.610        | MM   | 0.8510      | 6006.33594   | 117.62879    | 49.9099 |

### Enriched Sample:

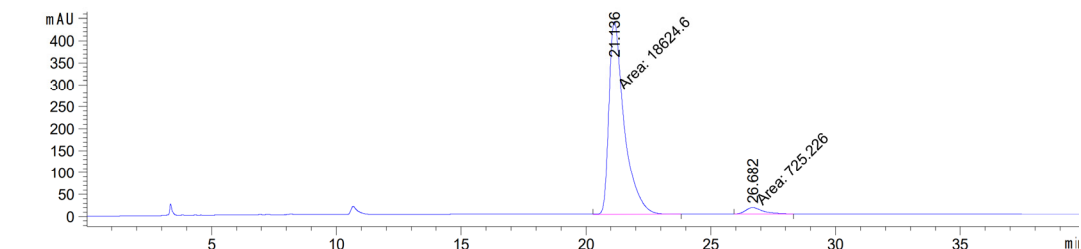

| Peak # | RetTime [min] | Type | Width [min] | Area [mAU*s] | Height [mAU] | Area %  |
|--------|---------------|------|-------------|--------------|--------------|---------|
| 1      | 21.136        | MM   | 0.7091      | 1.86246e4    | 437.77039    | 96.2520 |
| 2      | 26.682        | MM   | 0.8215      | 725.22614    | 14.71269     | 3.7480  |

### *S*-phenyl (*R*)-*N,N*-diisopentyl-*P*-phenylphosphonamidothioate (**5d**)

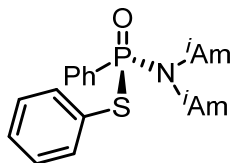

**5d**



An oven-dried 100 mL round-bottomed flask equipped with a magnetic stir bar was charged with catalyst **1a** (24 mg, 0.05 mmol), 4 Å mol sieves (800 mg), and diisoamylamine (0.72 mL, 3.5 mmol, 3.5 equiv.). The vial was then capped with a septum, sealed with parafilm, and put under N<sub>2</sub> atmosphere. The vial was charged with diethyl ether (50 mL), and the reaction mixture was cooled to –50 °C and subjected to stirring for 20 minutes at that temperature. Phenyl phosphonic dichloride (140 µL, 1 mmol, 1 equiv.) dissolved in toluene (1 mL) was then added in one portion, and the reaction was subjected to stirring at –50 °C for 4 hours.

A separate oven-dried 2-dram vial with a magnetic stir bar was charged with sodium hydride (0.6 g, 15 mmol, 15 equiv., 60% in mineral oil). The vial was then capped with a septum, sealed with parafilm, and put under N<sub>2</sub> atmosphere. The vial was then charged with THF (10 mL) and allowed to stir at room temperature for 1 minute. Thiophenol (509 µL, 5 mmol, 5 equiv.) was then added dropwise via a syringe through the septum to the stirring sodium hydride mixture over a 2-minute period, and stirring was continued at room temperature for 30 minutes. The resultant thiophenoxide mixture was then added directly to the catalytic reaction at –50 °C after it had been stirred for 24 hours. The reaction was then subjected to stirring for 24 hours at –50 °C, concentrated under reduced pressure, and purified by flash column chromatography on silica gel (0 to 40% Et<sub>2</sub>O in Hexanes) to afford the product. Phosphonamidothioate **5d** (366 mg, 90% yield, 94% ee) was afforded as a colorless oil. <sup>1</sup>H NMR (400 MHz, CDCl<sub>3</sub>) δ 7.95 – 7.74 (m, 2H), 7.55 (ddt, *J* = 6.8, 3.0, 1.5 Hz, 2H), 7.52 – 7.46 (m, 1H), 7.42 (tdd, *J* = 6.7, 3.8, 1.5 Hz, 2H), 7.25 – 7.19 (m, 3H), 3.25 – 2.80 (m, 4H), 1.53 – 1.29 (m, 4H), 1.18 (ddt, *J* = 12.7, 10.2, 6.3 Hz, 2H), 0.80 (dd, *J* = 6.6, 2.2 Hz, 12H); <sup>13</sup>C NMR (101 MHz, CDCl<sub>3</sub>) δ 134.62 (d, *J* = 4.3 Hz), 133.03 (d, *J* = 136.0 Hz), 131.98 (d, *J* = 3.1 Hz), 131.80 (d, *J* = 10.0 Hz), 128.99 (d, *J* = 1.4 Hz), 128.34 (d, *J* = 14.1 Hz), 128.34 (d, *J* = 5.3 Hz), 128.19 (d, *J* = 2.1 Hz), 43.77 (d, *J* = 3.6 Hz), 37.53 (d, *J* = 2.6 Hz), 26.00,

22.51 (d,  $J = 8.9$  Hz) ;  $^{31}\text{P}$  NMR (162 MHz,  $\text{CDCl}_3$ )  $\delta$  42.82 ; HRMS (ESI)  $m/z$  calcd for  $\text{C}_{22}\text{H}_{33}\text{NOPS}$  (M+H) $^+$ : 390.2015; found: 390.2013. Phosphonamidothioate **5d** was determined to be 94% ee by chiral HPLC analysis (CHIRALPAK IB, 3% iPrOH/hexanes, 1.0 mL/min, 220 nm,  $t_{\text{R}}(\text{minor}) = 11.6$  min,  $t_{\text{R}}(\text{major}) = 22.2$  min).

### Racemic Sample:

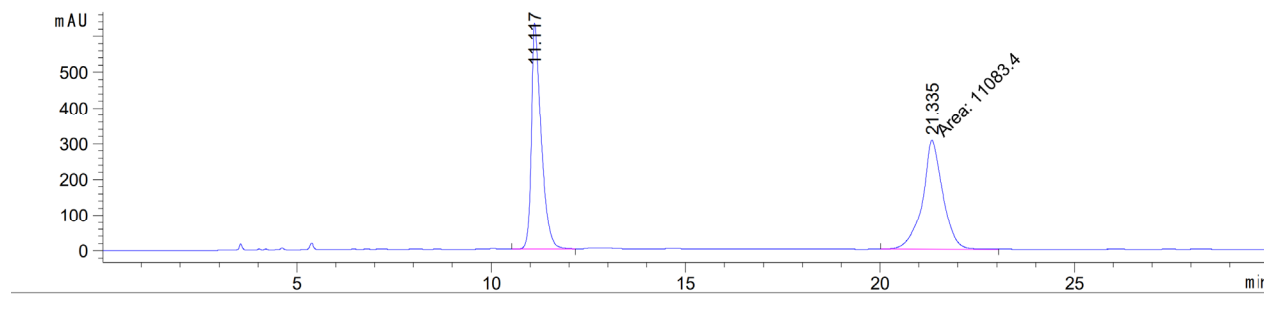

| Peak # | RetTime [min] | Type | Width [min] | Area [mAU*s] | Height [mAU] | Area %  |
|--------|---------------|------|-------------|--------------|--------------|---------|
| 1      | 11.117        | BB   | 0.2551      | 1.11106e4    | 631.90796    | 50.0613 |
| 2      | 21.335        | MM   | 0.6057      | 1.10834e4    | 304.99411    | 49.9387 |

### Enriched Sample:

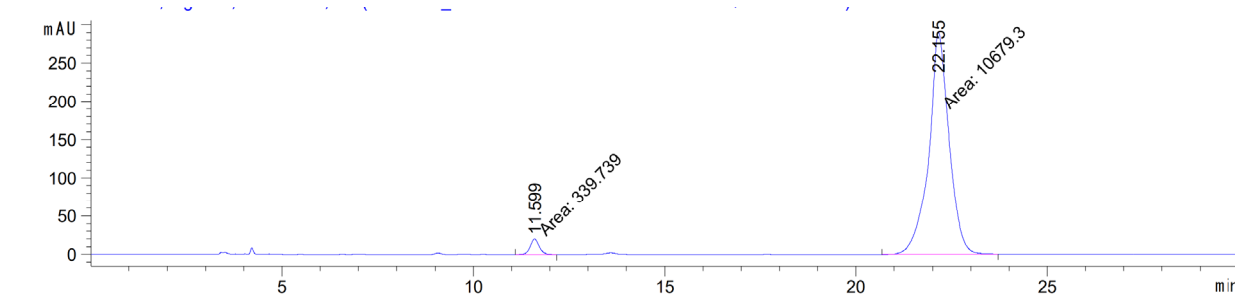

| Peak # | RetTime [min] | Type | Width [min] | Area [mAU*s] | Height [mAU] | Area %  |
|--------|---------------|------|-------------|--------------|--------------|---------|
| 1      | 11.599        | MM   | 0.2766      | 339.73944    | 20.46908     | 3.0832  |
| 2      | 22.155        | MM   | 0.6115      | 1.06793e4    | 291.07159    | 96.9168 |

### **Gram-scale synthesis of 5d:**

An oven-dried 250 mL round-bottomed flask equipped with a magnetic stir bar was charged with catalyst **1a** (71 mg, 0.15 mmol), 4 Å mol sieves (2.6 g), and diisoamylamine (1.85 mL, 9 mmol, 3 equiv.). The vial was then capped with a septum, sealed with parafilm, and put under N<sub>2</sub> atmosphere. The vial was charged with diethyl ether (125 mL), and the reaction mixture was cooled to –50 °C and subjected to stirring for 20 minutes at that temperature. Phenyl phosphonic dichloride (0.42 mL, 3 mmol, 1 equiv.) was then added in one portion, and the reaction was subjected to stirring at –50 °C for 12 hours.

A separate oven-dried 2-dram vial with a magnetic stir bar was charged with sodium hydride (1.8 g, 45 mmol, 15 equiv., 60% in mineral oil). The vial was then capped with a septum, sealed with parafilm, and put under N<sub>2</sub> atmosphere. The vial was then charged with THF (30 mL) and allowed to stir at room temperature for 1 minute. Thiophenol (1.6 mL, 5 mmol, 5 equiv.) was then added dropwise via a syringe through the septum to the stirring sodium hydride mixture over a 5-minute period, and stirring was continued at room temperature for 30 minutes. The resultant thiophenoxide mixture was then added directly to the catalytic reaction at –50 °C after it had been stirred for 24 hours. The reaction was then subjected to stirring for 12 hours at –50 °C then warmed to room temperature while subjected to stirring. The reaction as then filtered through a fritted funnel packed

with ~2 inches of silica gel to remove the solids, which was then washed with diethyl ether (250 mL). The filtrate was then concentrated under reduced pressure and purified by flash column chromatography on silica gel (0 to 25% EtOAc in Hexanes) to afford the product. Phosphonamidothioate **5d** (1.1095 g, 95% yield, 92% ee) was afforded as a colorless oil. Phosphonamidothioate **5d** was determined to be 92% ee by chiral HPLC analysis (CHIRALPAK IB, 3% iPrOH/hexanes, 1.0 mL/min, 220 nm,  $t_R(\text{minor}) = 11.6 \text{ min}$ ,  $t_R(\text{major}) = 21 \text{ min}$ ).

### Racemic Sample:

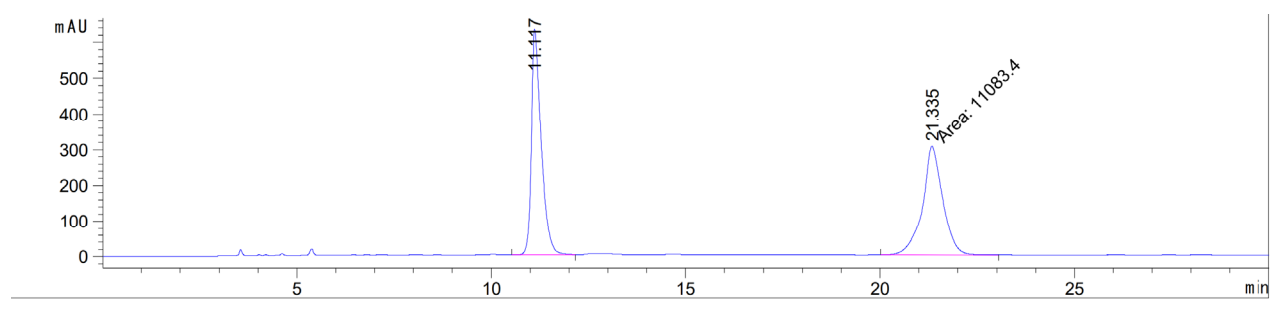

| Peak # | RetTime [min] | Type | Width [min] | Area [mAU*s] | Height [mAU] | Area %  |
|--------|---------------|------|-------------|--------------|--------------|---------|
| 1      | 11.117        | BB   | 0.2551      | 1.11106e4    | 631.90796    | 50.0613 |
| 2      | 21.335        | MM   | 0.6057      | 1.10834e4    | 304.99411    | 49.9387 |

### Enriched Sample:

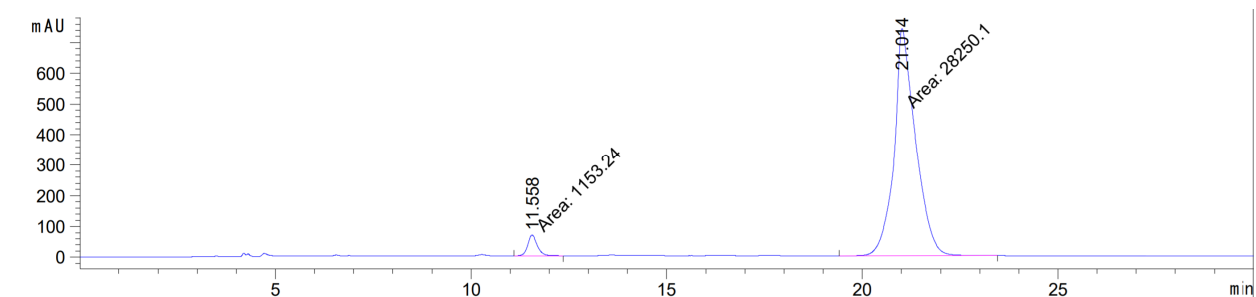

| Peak # | RetTime [min] | Type | Width [min] | Area [mAU*s] | Height [mAU] | Area %  |
|--------|---------------|------|-------------|--------------|--------------|---------|
| 1      | 11.558        | MM   | 0.2839      | 1153.24304   | 67.70479     | 3.9221  |
| 2      | 21.014        | MM   | 0.6354      | 2.82501e4    | 741.01544    | 96.0779 |

***S*-benzyl (*R*)-*N,N*-diisopentyl-*P*-phenylphosphonamidothioate (**5e**)**

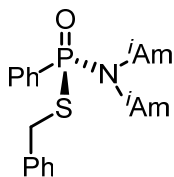

**5e**

Following **General Procedure A**, phosphonamidothioate **5e** (73 mg, 91% yield, 94% ee) was produced as a colorless oil from phenyl phosphonic dichloride (28  $\mu$ L, 0.2 mmol), sodium hydride (120 mg, 3 mmol, 15 equiv., 60% in mineral oil), and benzyl mercaptan (117  $\mu$ L, 1 mmol, 5 equiv.). The product was purified via flash column chromatography on silica gel (0 to 100% Et<sub>2</sub>O in Hexanes). <sup>1</sup>H NMR (400 MHz, CDCl<sub>3</sub>)  $\delta$  7.92 – 7.81 (m, 2H), 7.55 – 7.38 (m, 3H), 7.29 – 7.13 (m, 5H), 4.14 – 3.77 (m, 2H), 3.08 – 2.89 (m, 4H), 1.51 – 1.19 (m, 6H), 0.80 (dd, *J* = 6.5, 4.7 Hz, 12H) ; <sup>13</sup>C NMR (101 MHz, CDCl<sub>3</sub>)  $\delta$  137.83, 133.24 (d, *J* = 135.6 Hz), 131.99 (d, *J* = 10.6 Hz), 131.91 (d, *J* = 2.8 Hz), 129.01, 128.48, 128.37 (d, *J* = 14.1 Hz), 127.17, 43.79 (d, *J* = 3.8 Hz), 37.70 (d, *J* = 2.7 Hz), 34.48 (d, *J* = 2.5 Hz), 26.00, 22.49 (d, *J* = 7.2 Hz) ; <sup>31</sup>P NMR (162 MHz, CDCl<sub>3</sub>)  $\delta$  44.57 ; HRMS (ESI) *m/z* calcd for C<sub>23</sub>H<sub>35</sub>NOPS (M+H)<sup>+</sup>: 404.2171; found: 404.2170. Phosphonamidothioate **5e** was determined to be 94% ee by chiral HPLC analysis (CHIRALPAK IB, 2% iPrOH/hexanes, 1.0 mL/min, 230 nm, *t*<sub>R</sub>(minor) = 22.2 min, *t*<sub>R</sub>(major) = 19.0 min).

### Racemic Sample:

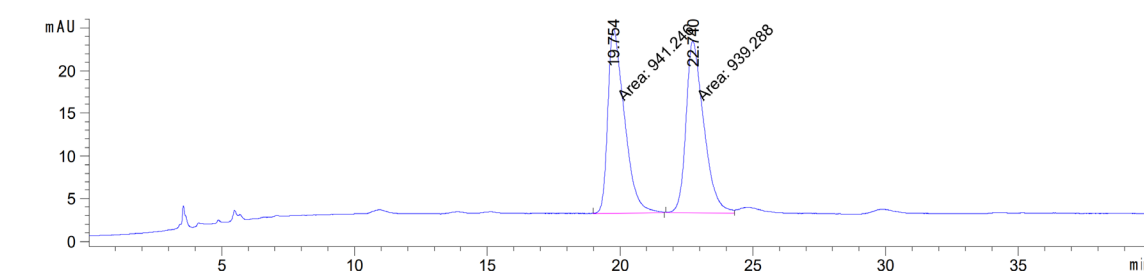

| Peak # | RetTime [min] | Type | Width [min] | Area [mAU*s] | Height [mAU] | Area %  |
|--------|---------------|------|-------------|--------------|--------------|---------|
| 1      | 19.754        | MM   | 0.7251      | 941.24573    | 21.63447     | 50.0521 |
| 2      | 22.740        | MF   | 0.7760      | 939.28778    | 20.17343     | 49.9479 |

### Enriched Sample:

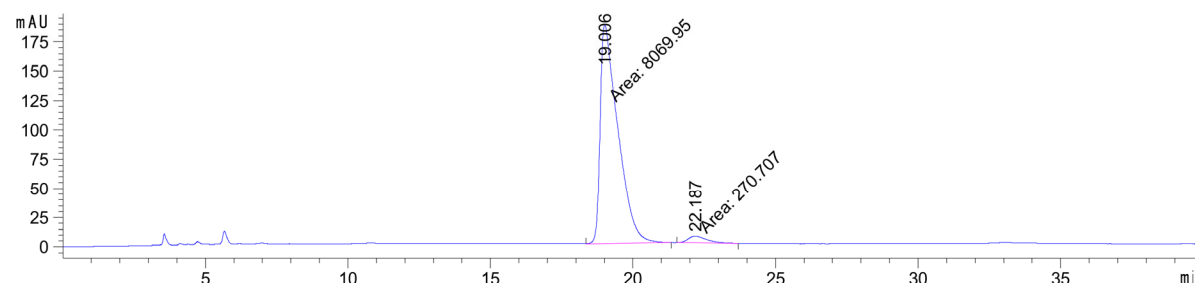

| Peak # | RetTime [min] | Type | Width [min] | Area [mAU*s] | Height [mAU] | Area %  |
|--------|---------------|------|-------------|--------------|--------------|---------|
| 1      | 19.006        | MM   | 0.7196      | 8069.95459   | 186.90515    | 96.7544 |
| 2      | 22.187        | MM   | 0.7659      | 270.70706    | 5.89054      | 3.2456  |

### Benzyl (*R*)-((diisopentylamino)(phenyl)phosphoryl)carbamate (**5f**)

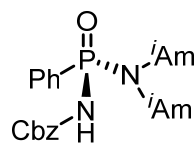

**5f**

Following **General Procedure B**, compound **5f** (64 mg, 75% yield, 92% ee) was produced as a colorless oil from phenyl phosphonic dichloride (28  $\mu$ L, 0.2 mmol), sodium hydride (48 mg, 1.2 mmol, 6 equiv., 60% in mineral oil), and benzyl carbamate (60 mg, 0.4 mmol, 2 equiv.). The product was purified via flash column chromatography (0 to 100% EtOAc in DCM). *NOTE: after addition of sodium benzyl carbamide mixture, reaction was subjected to stirring at  $-30$  °C instead of  $-50$  °C.*  $^1\text{H}$  NMR (400 MHz,  $\text{CDCl}_3$ )  $\delta$  7.88 (ddd,  $J = 13.5, 8.3, 1.4$  Hz, 2H), 7.58 – 7.49 (m, 1H), 7.49 – 7.40 (m, 2H), 7.40 – 7.27 (m, 5H), 5.96 (s, 1H), 5.21 – 5.01 (m, 2H), 3.17 – 2.86 (m, 4H), 1.49 – 1.34 (m, 4H), 1.34 – 1.18 (m, 2H), 0.77 (t,  $J = 6.1$  Hz, 12H);  $^{13}\text{C}$  NMR (101 MHz,  $\text{CDCl}_3$ )  $\delta$  153.91 (d,  $J = 3.2$  Hz), 135.49, 132.35 (d,  $J = 3.2$  Hz), 132.02 (d,  $J = 10.3$  Hz), 128.92 (d,  $J = 385.5$  Hz), 128.46 (d,  $J = 7.4$  Hz), 128.44 (d,  $J = 153.6$  Hz), 128.42 (d,  $J = 34.3$  Hz), 128.26 (d,  $J = 18.9$  Hz), 67.67, 43.64 (d,  $J = 4.7$  Hz), 37.35 (d,  $J = 2.6$  Hz), 26.04, 22.47 (d,  $J = 10.6$  Hz);  $^{31}\text{P}$  NMR (162 MHz,  $\text{CDCl}_3$ )  $\delta$  18.96; HRMS (ESI)  $m/z$  calcd for  $\text{C}_{24}\text{H}_{36}\text{N}_2\text{O}_3\text{P}$  ( $\text{M}+\text{H}$ ) $^+$ : 431.2458; found: 431.2454. Compound **5f** was determined to be 92% ee by chiral HPLC analysis (CHIRALPAK AD-H, 5% iPrOH/hexanes, 1.0 mL/min, 220 nm,  $t_{\text{R}}$ (minor) = 22.3 min,  $t_{\text{R}}$ (major) = 16.5 min).

### Racemic Sample:

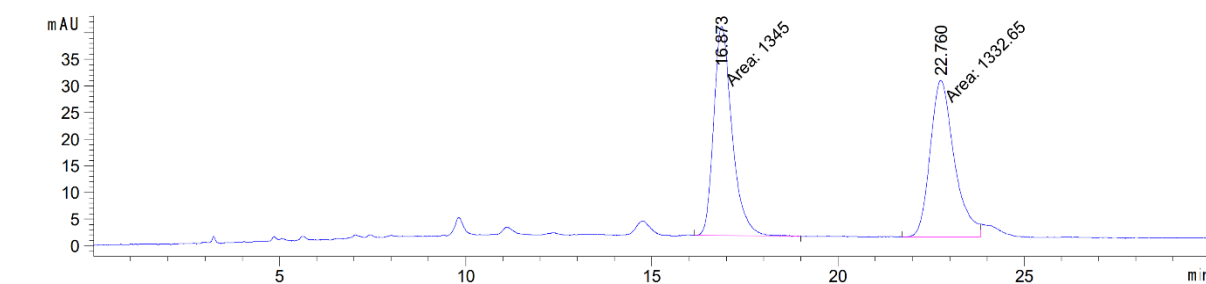

| Peak # | RetTime [min] | Type | Width [min] | Area [mAU*s] | Height [mAU] | Area %  |
|--------|---------------|------|-------------|--------------|--------------|---------|
| 1      | 16.873        | MM   | 0.5710      | 1345.00012   | 39.25836     | 50.2306 |
| 2      | 22.760        | MF   | 0.7542      | 1332.65039   | 29.45085     | 49.7694 |

### Enriched Sample:

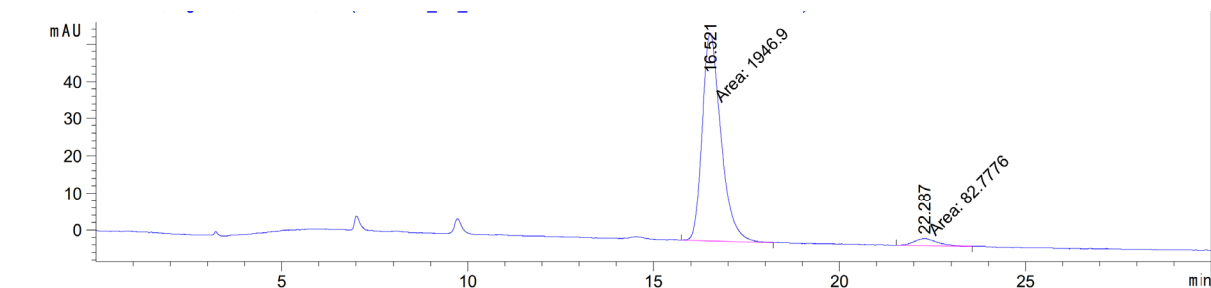

| Peak # | RetTime [min] | Type | Width [min] | Area [mAU*s] | Height [mAU] | Area %  |
|--------|---------------|------|-------------|--------------|--------------|---------|
| 1      | 16.521        | MM   | 0.5804      | 1946.89990   | 55.90345     | 95.9216 |
| 2      | 22.287        | MM   | 0.7176      | 82.77764     | 1.92254      | 4.0784  |

### (*R*)-*N,N*-diisopentyl-*P*-(2-methoxyphenyl)-*P*-phenylphosphinic amide (**5g**)

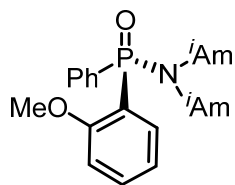

**5g**

Following **General Procedure B**, phosphinamidate **5g** (75 mg, 97% yield, 91% ee) was produced as a colorless oil from phenyl phosphonic dichloride (42 mg, 0.2 mmol) and 2-methoxyphenyl magnesium bromide (1 mL, 1 M solution in THF, 5.0 equiv.). The product was purified via flash



column chromatography (0 to 10% MeOH in DCM).  $^1\text{H}$  NMR (400 MHz,  $\text{CDCl}_3$ )  $\delta$  8.00 (ddd,  $J = 13.5, 7.6, 1.8$  Hz, 1H), 7.93 – 7.74 (m, 2H), 7.55 – 7.33 (m, 4H), 7.06 (tdd,  $J = 7.5, 2.1, 0.9$  Hz, 1H), 6.91 – 6.82 (m, 1H), 3.74 (s, 3H), 3.19 – 2.80 (m, 4H), 1.53 – 1.29 (m, 6H), 0.74 (d,  $J = 6.2$  Hz, 12H);  $^{13}\text{C}$  NMR (101 MHz,  $\text{CDCl}_3$ )  $\delta$  160.44 (d,  $J = 3.2$  Hz), 136.03 (d,  $J = 6.8$  Hz), 134.07, 133.73 (d,  $J = 2.0$  Hz), 132.67 (d,  $J = 10.2$  Hz), 131.14 (d,  $J = 2.9$  Hz), 127.77 (d,  $J = 12.9$  Hz), 120.73 (d,  $J = 11.9$  Hz), 120.38 (d,  $J = 123.5$  Hz), 110.65 (d,  $J = 7.2$  Hz), 54.95, 43.82 (d,  $J = 4.1$  Hz), 37.61 (d,  $J = 3.0$  Hz), 26.15, 22.53 (d,  $J = 2.7$  Hz);  $^{31}\text{P}$  NMR (162 MHz,  $\text{CDCl}_3$ )  $\delta$  29.34; HRMS (ESI)  $m/z$  calcd for  $\text{C}_{23}\text{H}_{35}\text{NO}_2\text{P}$  ( $\text{M}+\text{H}$ ) $^+$ : 388.2400; found: 388.2397. Phosphinamidate **5g** was determined to be 91% ee by chiral HPLC analysis (CHIRALPAK AD-H, 4% iPrOH/hexanes, 1.0 mL/min, 230 nm,  $t_{\text{R}}(\text{minor}) = 67.4$  min,  $t_{\text{R}}(\text{major}) = 42.7$  min).

#### Racemic Sample:

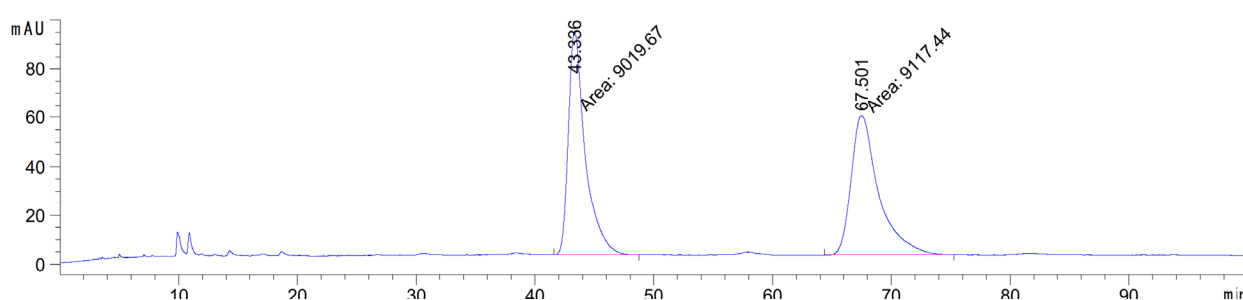

| Peak # | RetTime [min] | Type | Width [min] | Area [mAU*s] | Height [mAU] | Area %  |
|--------|---------------|------|-------------|--------------|--------------|---------|
| 1      | 43.336        | MM   | 1.6402      | 9019.67285   | 91.65068     | 49.7305 |
| 2      | 67.501        | MM   | 2.6826      | 9117.43652   | 56.64543     | 50.2695 |

#### Enriched Sample:

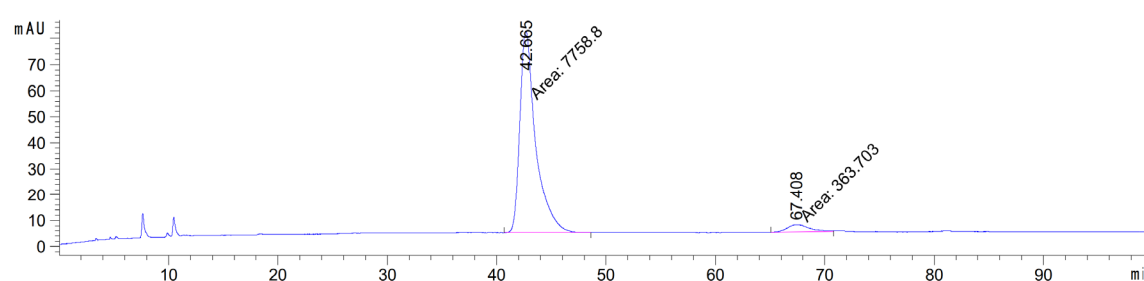

| Peak # | RetTime [min] | Type | Width [min] | Area [mAU*s] | Height [mAU] | Area %  |
|--------|---------------|------|-------------|--------------|--------------|---------|
| 1      | 42.665        | MM   | 1.6717      | 7758.80078   | 77.35439     | 95.5223 |
| 2      | 67.408        | MM   | 2.2708      | 363.70343    | 2.66937      | 4.4777  |

**(S)-N,N-diisopentyl-P-methyl-P-phenylphosphinic amide (5h)**

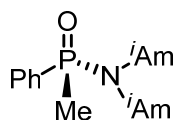

**5h**

Following **General Procedure B**, phosphinamidate **5h** (55 mg, 94% yield, 94% ee) was produced as a colorless oil from phenyl phosphonic dichloride (28  $\mu$ L, 0.2 mmol), methylmagnesium chloride (0.5 mL, 2 M solution in THF, 5 equiv.). The product was purified via flash column chromatography (0 to 10% MeOH in DCM).  $^1\text{H}$  NMR (400 MHz,  $\text{CDCl}_3$ )  $\delta$  7.75 (ddt,  $J = 11.8, 8.3, 1.8$  Hz, 2H), 7.46 (dddd,  $J = 14.0, 9.0, 6.7, 2.1$  Hz, 3H), 2.94 (tdd,  $J = 10.9, 5.6, 2.9$  Hz, 4H), 1.70 (dd,  $J = 13.6, 3.1$  Hz, 3H), 1.53 – 1.29 (m, 6H), 0.81 (dt,  $J = 6.4, 2.2$  Hz, 12H);  $^{13}\text{C}$  NMR (101 MHz,  $\text{CDCl}_3$ )  $\delta$  133.90 (d,  $J = 125.8$  Hz), 131.46, 131.39 (d,  $J = 9.4$  Hz), 128.38 (d,  $J = 12.3$  Hz), 43.99 (d,  $J = 3.2$  Hz), 38.06 (d,  $J = 3.2$  Hz), 26.09, 22.51 (d,  $J = 7.4$  Hz), 15.30 (d,  $J = 93.4$  Hz);  $^{31}\text{P}$  NMR (162 MHz,  $\text{CDCl}_3$ )  $\delta$  35.81; HRMS (ESI)  $m/z$  calcd for  $\text{C}_{17}\text{H}_{31}\text{NOP}$  ( $\text{M}+\text{H}$ ) $^+$ :

296.2138; found: 296.2138. Phosphinamidate **5h** was determined to be 94% ee by chiral HPLC analysis (CHIRALPAK AS-H, 10% iPrOH/hexanes, 1.0 mL/min, 210 nm,  $t_R(\text{minor}) = 20.2$  min,  $t_R(\text{major}) = 23.5$  min).

### Racemic Sample:

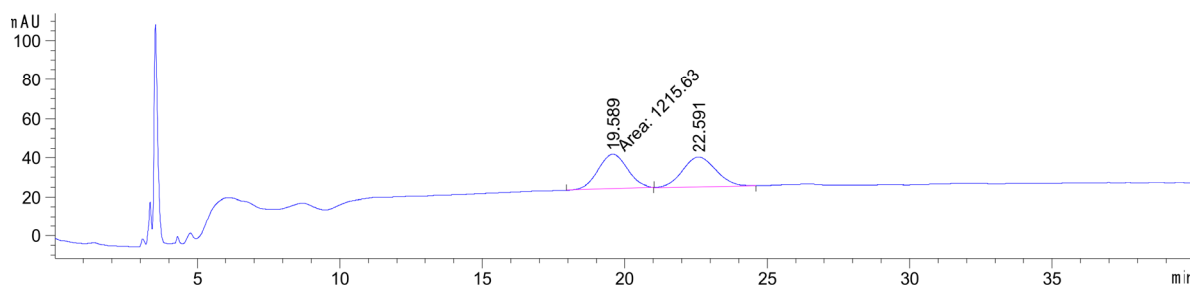

| Peak # | RetTime [min] | Type | Width [min] | Area [mAU*s] | Height [mAU] | Area %  |
|--------|---------------|------|-------------|--------------|--------------|---------|
| 1      | 19.589        | MM   | 1.1803      | 1215.62708   | 17.16542     | 49.9831 |
| 2      | 22.591        | VB   | 1.0058      | 1216.44971   | 15.10050     | 50.0169 |

### Enriched Sample:

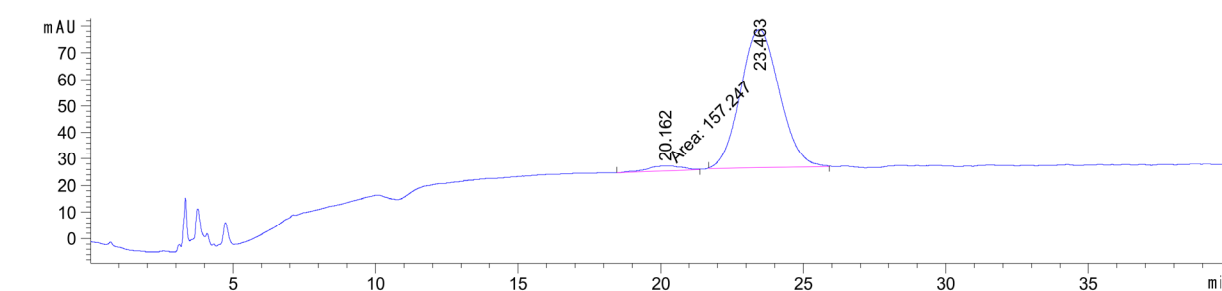

| Peak # | RetTime [min] | Type | Width [min] | Area [mAU*s] | Height [mAU] | Area %  |
|--------|---------------|------|-------------|--------------|--------------|---------|
| 1      | 20.162        | MM   | 1.4032      | 157.24745    | 1.86771      | 3.0860  |
| 2      | 23.463        | BB   | 1.2952      | 4938.28516   | 51.93941     | 96.9140 |

## Scope of Enantiospecific Displacement of Diisoamylamino Group with Alcohols

### 4-(*N,N*-dimethylsulfamoyl)phenyl methyl (*R*)-phenylphosphonate (**6a**)

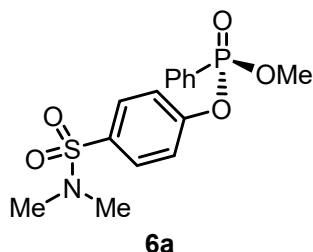

Following **General Procedure E**, phosphonate **6a** (33 mg, 93% yield, 93% ee) was produced as a colorless oil from phosphoramidate **5a** (48 mg, 0.1 mmol, 94% ee), methanol (0.5 mL), and *para*-tolylsulfonic acid monohydrate (57 mg, 0.3 mmol, 3 equiv.). The product was purified via flash column chromatography (0 to 10% MeOH in DCM). <sup>1</sup>H NMR (400 MHz, CDCl<sub>3</sub>) δ 7.88 (ddt, *J* = 13.9, 6.9, 1.4 Hz, 2H), 7.80 – 7.67 (m, 2H), 7.67 – 7.57 (m, 1H), 7.51 (ddd, *J* = 8.6, 7.0, 4.6 Hz, 2H), 7.41 – 7.29 (m, 2H), 3.90 (d, *J* = 11.4 Hz, 3H), 2.69 (s, 6H); <sup>13</sup>C NMR (101 MHz, CDCl<sub>3</sub>) δ 153.97 (d, *J* = 6.8 Hz), 133.42 (d, *J* = 3.1 Hz), 132.04 (d, *J* = 10.3 Hz), 132.03, 129.74, 128.83 (d, *J* = 15.7 Hz), 126.14 (d, *J* = 191.6 Hz), 120.96 (d, *J* = 4.8 Hz), 53.34 (d, *J* = 5.9 Hz), 37.89; <sup>31</sup>P NMR (162 MHz, CDCl<sub>3</sub>) δ 17.34; HRMS (ESI) *m/z* calcd for C<sub>15</sub>H<sub>19</sub>NO<sub>5</sub>PS (M+H)<sup>+</sup>: 356.0716; found: 356.0716. Phosphonate **6a** was determined to be 93% ee by chiral HPLC analysis (CHIRALPAK AD-H, 20% *i*PrOH/hexanes, 1.0 mL/min, 210 nm, *t*<sub>R</sub>(minor) = 24.7 min, *t*<sub>R</sub>(major) = 20.4 min).

#### Racemic Sample:

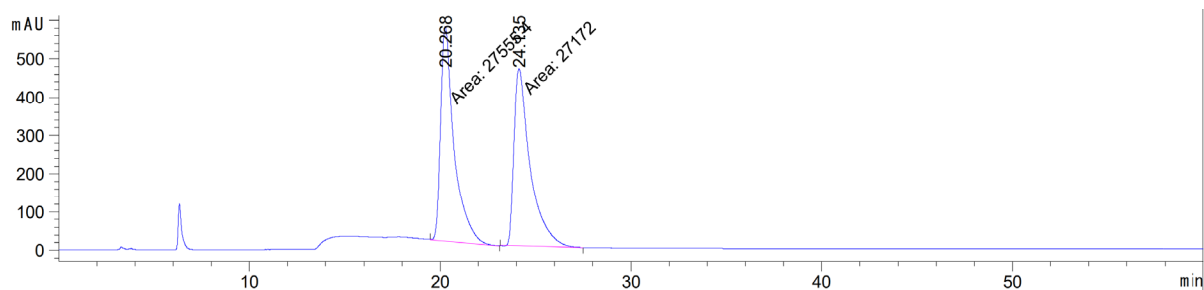

| Peak # | RetTime [min] | Type | Width [min] | Area [mAU*s] | Height [mAU] | Area %  |
|--------|---------------|------|-------------|--------------|--------------|---------|
| 1      | 20.268        | MM   | 0.8207      | 2.75554e4    | 559.59259    | 50.3503 |
| 2      | 24.135        | MM   | 0.9792      | 2.71720e4    | 462.48834    | 49.6497 |

**Enriched Sample:**

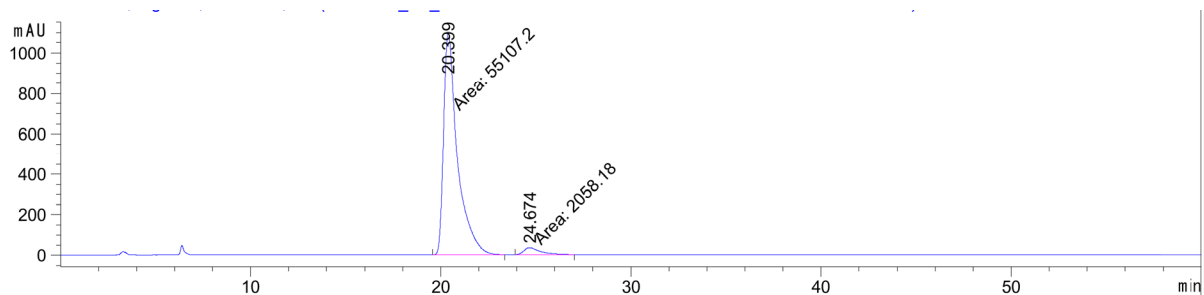

| Peak # | RetTime [min] | Type | Width [min] | Area [mAU*s] | Height [mAU] | Area %  |
|--------|---------------|------|-------------|--------------|--------------|---------|
| 1      | 20.399        | MM   | 0.8395      | 5.51072e4    | 1094.08679   | 96.3996 |
| 2      | 24.674        | MM   | 1.0070      | 2058.18286   | 34.06351     | 3.6004  |

## Methyl (4-(trifluoromethyl)phenyl) (*R*)-phenylphosphonate (**6b**)

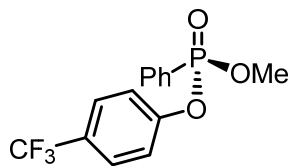

**6b**

Following **General Procedure E**, phosphonate **6b** (132 mg, 74% yield, 93% ee) was produced as a colorless oil from phosphoramidate **5b** (251 mg, 0.57 mmol), methanol (2.8 mL), and *para*-tolylsulfonic acid monohydrate (325 mg, 1.71 mmol, 3 equiv.). The product was purified via flash column chromatography (0 to 50% Et<sub>2</sub>O in Hexanes). <sup>1</sup>H NMR (400 MHz, CDCl<sub>3</sub>) δ 7.88 (ddd, *J* = 13.8, 8.3, 1.4 Hz, 2H), 7.67 – 7.44 (m, 5H), 7.29 (d, *J* = 8.6 Hz, 2H), 3.89 (d, *J* = 11.4 Hz, 3H); <sup>13</sup>C NMR (101 MHz, CDCl<sub>3</sub>) δ 153.13 (d, *J* = 6.5 Hz), 133.29 (d, *J* = 3.1 Hz), 132.05 (d, *J* = 10.2 Hz), 128.76 (d, *J* = 15.6 Hz), 127.19 (q, *J* = 32.5 Hz), 127.11 (q, *J* = 3.8 Hz), 126.33 (d, *J* = 191.5 Hz), 123.86 (q, *J* = 271.8 Hz), 120.83 (d, *J* = 4.6 Hz), 53.26 (d, *J* = 5.8 Hz); <sup>19</sup>F NMR (376 MHz, CDCl<sub>3</sub>) δ -62.18; <sup>31</sup>P NMR (162 MHz, CDCl<sub>3</sub>) δ 17.21; HRMS (ESI) *m/z* calcd for C<sub>14</sub>H<sub>13</sub>F<sub>3</sub>O<sub>3</sub>P (M+H)<sup>+</sup>: 317.0549; found: 317.0550. Phosphonate **6b** was determined to be 93% ee by chiral HPLC analysis (CHIRALPAK AD-H, 5% *i*PrOH/hexanes, 1.0 mL/min, 210 nm, *t*<sub>R</sub>(minor) = 26.2 min, *t*<sub>R</sub>(major) = 22.6 min).

### Racemic Sample:

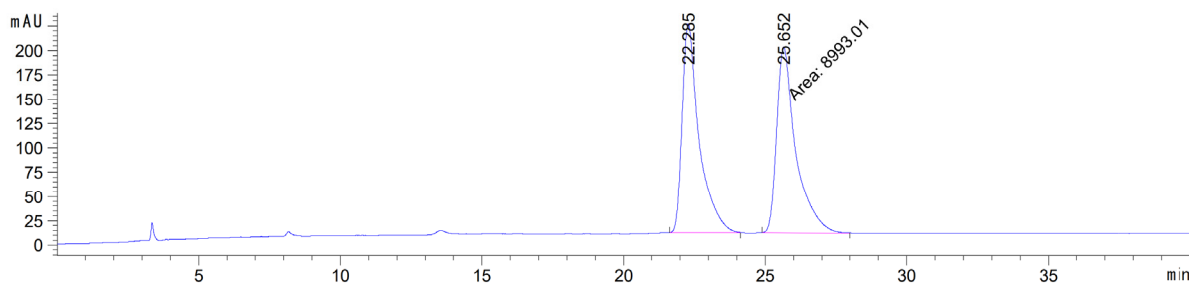

| Peak # | RetTime [min] | Type | Width [min] | Area [mAU*s] | Height [mAU] | Area %  |
|--------|---------------|------|-------------|--------------|--------------|---------|
| 1      | 22.285        | BB   | 0.6077      | 8970.52344   | 214.58705    | 49.9374 |
| 2      | 25.652        | MM   | 0.7846      | 8993.00977   | 191.02090    | 50.0626 |

### Enriched Sample:

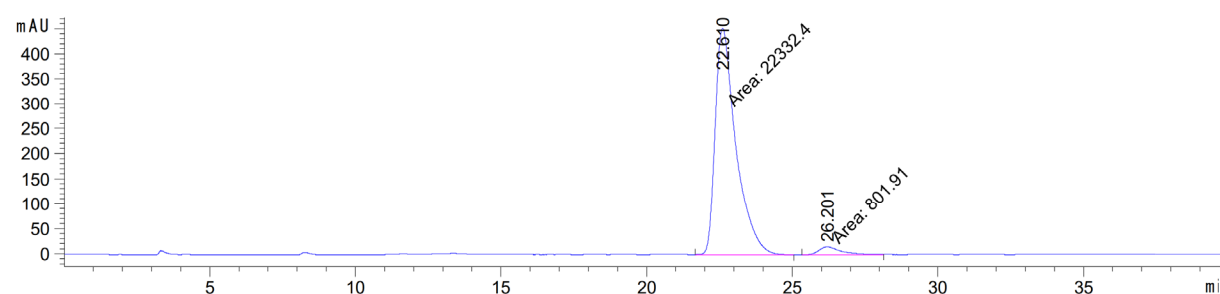

| Peak # | RetTime [min] | Type | Width [min] | Area [mAU*s] | Height [mAU] | Area %  |
|--------|---------------|------|-------------|--------------|--------------|---------|
| 1      | 22.610        | MM   | 0.8225      | 2.23324e4    | 452.50851    | 96.5337 |
| 2      | 26.201        | MM   | 0.8649      | 801.91028    | 15.45306     | 3.4663  |

### Methyl phenyl (*R*)-phenylphosphonate (**6c**)

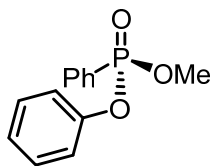

**6c**

Following **General Procedure E**, phosphonate **6c** (55 mg, 92%; 93% ee) was produced as a colorless oil from phosphoramidate **5c** (90 mg, 0.24 mmol, 93% ee), methanol (1.2 mL), and *para*-tolylsulfonic acid monohydrate (137 mg) with a 24-hour reaction time. The product was purified

via flash column chromatography (0 to 60% Et<sub>2</sub>O in Hexanes). <sup>1</sup>H NMR (400 MHz, CDCl<sub>3</sub>) δ 7.93 – 7.83 (m, 2H), 7.67 – 7.54 (m, 1H), 7.53 – 7.43 (m, 2H), 7.33 – 7.24 (m, 3H), 7.17 – 7.09 (m, 2H), 3.87 (d, *J* = 11.3 Hz, 3H); <sup>13</sup>C NMR (101 MHz, CDCl<sub>3</sub>) δ 150.56 (d, *J* = 7.2 Hz), 132.92 (d, *J* = 3.1 Hz), 132.08 (d, *J* = 10.2 Hz), 129.69, 128.59 (d, *J* = 15.5 Hz), 126.98 (d, *J* = 191.1 Hz), 124.90, 120.51 (d, *J* = 4.5 Hz), 53.10 (d, *J* = 5.9 Hz); <sup>31</sup>P NMR (162 MHz, CDCl<sub>3</sub>) δ 16.82; HRMS (ESI) *m/z* calcd for C<sub>13</sub>H<sub>14</sub>O<sub>3</sub>P (M+H)<sup>+</sup>: 249.0675; found: 249.0675. Phosphonate **6c** was determined to be 93% ee by chiral HPLC analysis (CHIRALPAK AD-H, 5% iPrOH/hexanes, 1.0 mL/min, 210 nm, *t*<sub>R</sub>(minor) = 29.0 min, *t*<sub>R</sub>(major) = 23.2 min).

### Racemic Sample:

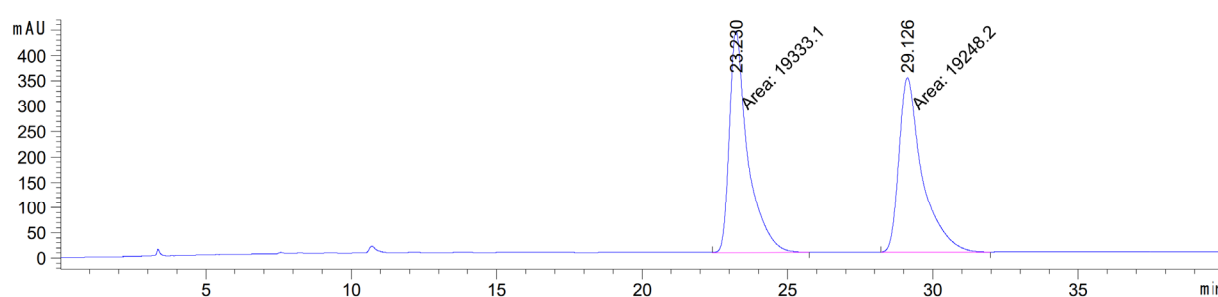

| Peak # | RetTime [min] | Type | Width [min] | Area [mAU*s] | Height [mAU] | Area %  |
|--------|---------------|------|-------------|--------------|--------------|---------|
| 1      | 23.230        | MM   | 0.7373      | 1.93331e4    | 436.99603    | 50.1099 |
| 2      | 29.126        | MM   | 0.9302      | 1.92482e4    | 344.85953    | 49.8901 |

### Enriched Sample:

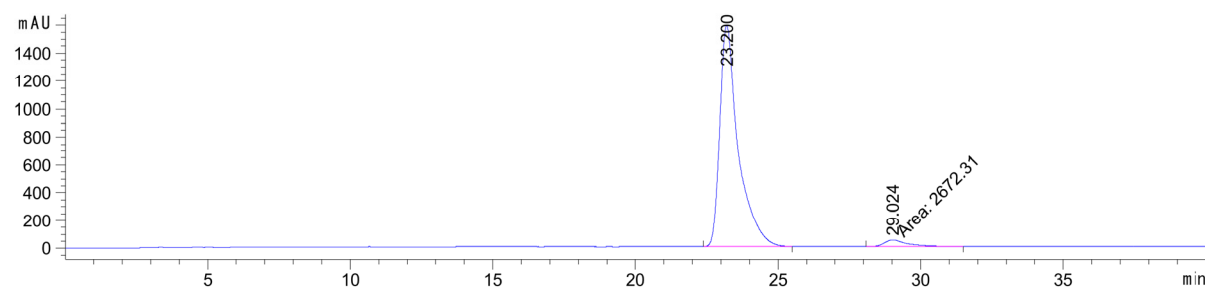



| Peak # | RetTime [min] | Type | Width [min] | Area [mAU*s] | Height [mAU] | Area %  |
|--------|---------------|------|-------------|--------------|--------------|---------|
| 1      | 23.200        | BB   | 0.6597      | 7.14970e4    | 1586.84241   | 96.3970 |
| 2      | 29.024        | MM   | 0.9334      | 2672.30884   | 47.71827     | 3.6030  |

### ***O*-methyl *S*-phenyl (*R*)-phenylphosphonothioate (**6d**)**

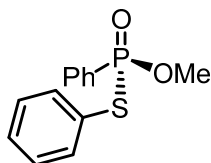

**6d**

Following **General Procedure E**, phosphonothioate **6d** (197 mg, 82% yield, 93% ee) was produced as a colorless oil from phosphonamidothioate **5d** (350 mg, 0.9 mmol, 94% ee), methanol (3 mL), and *para*-tolylsulfonic acid monohydrate (513 mg, 27 mmol, 3 equiv.). The product was purified via flash column chromatography (0 to 60% Et<sub>2</sub>O in Hexanes). *Note: this product must be stored under inert atmosphere below 0 °C, preferably at –80 °C.* <sup>1</sup>H NMR (300 MHz, CDCl<sub>3</sub>) δ 7.69 – 7.58 (m, 2H), 7.55 – 7.45 (m, 1H), 7.37 (ddd, *J* = 8.9, 7.0, 4.6 Hz, 2H), 7.29 (ddt, *J* = 7.0, 3.8, 1.4 Hz, 3H), 7.24 – 7.17 (m, 2H), 3.95 (d, *J* = 12.3 Hz, 3H); <sup>13</sup>C NMR (101 MHz, CDCl<sub>3</sub>) δ 135.53 (d, *J* = 4.3 Hz), 132.61 (d, *J* = 3.3 Hz), 131.47 (d, *J* = 10.6 Hz), 131.00 (d, *J* = 151.1 Hz), 129.20 (d, *J* = 2.3 Hz), 129.05 (d, *J* = 2.9 Hz), 128.23 (d, *J* = 15.1 Hz), 126.48 (d, *J* = 5.7 Hz), 52.44 (d, *J* = 7.0 Hz); <sup>31</sup>P NMR (162 MHz, CDCl<sub>3</sub>) δ 43.65; HRMS (ESI) *m/z* calcd for C<sub>13</sub>H<sub>14</sub>O<sub>2</sub>PS (M+H)<sup>+</sup>: 265.0447; found: 265.0448. Phosphonothioate **6d** was determined to be 93% ee by chiral HPLC analysis (CHIRALPAK AD-H, 5% iPrOH/hexanes, 1.0 mL/min, 220 nm, *t*<sub>R</sub>(minor) = 26.9 min, *t*<sub>R</sub>(major) = 30.7 min).

**Racemic Sample:**

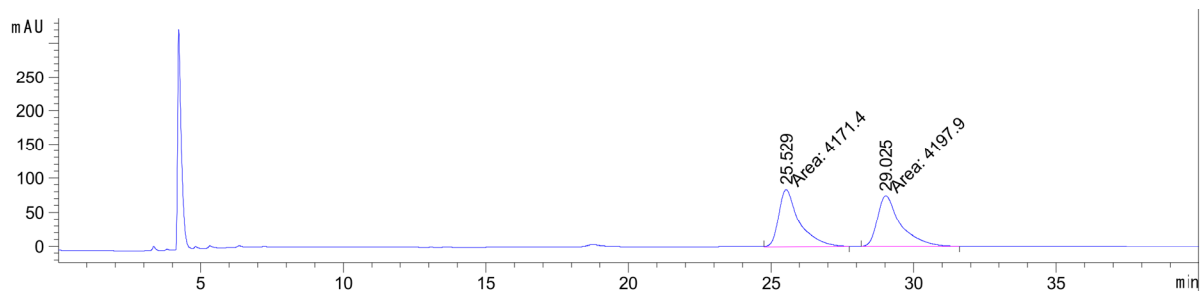

| Peak # | RetTime [min] | Type | Width [min] | Area [mAU*s] | Height [mAU] | Area %  |
|--------|---------------|------|-------------|--------------|--------------|---------|
| 1      | 25.529        | MM   | 0.8282      | 4171.40186   | 83.94846     | 49.8417 |
| 2      | 29.025        | MM   | 0.9353      | 4197.89648   | 74.80561     | 50.1583 |

### Enriched Sample:

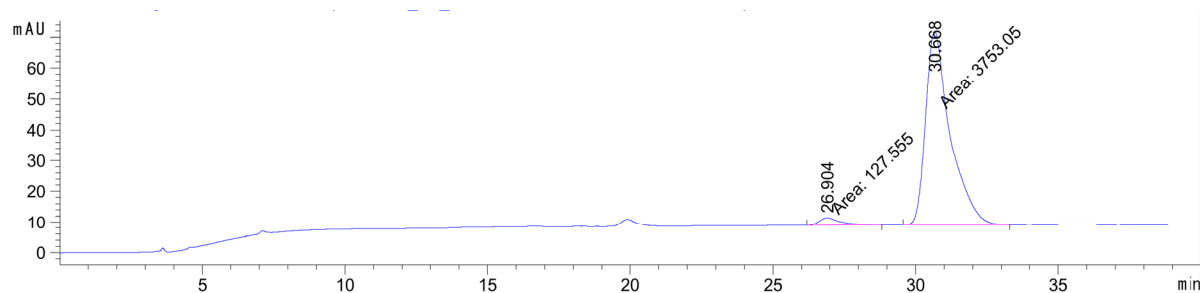

| Peak # | RetTime [min] | Type | Width [min] | Area [mAU*s] | Height [mAU] | Area %  |
|--------|---------------|------|-------------|--------------|--------------|---------|
| 1      | 26.904        | MM   | 0.8621      | 127.55495    | 2.46610      | 3.2870  |
| 2      | 30.668        | MM   | 0.9956      | 3753.04932   | 62.82982     | 96.7130 |

### ***S*-benzyl *O*-methyl (*R*)-phenylphosphonothioate (**6e**)**

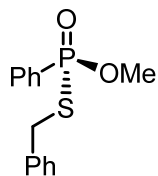

**6e**

Following **General Procedure E**, phosphonothioate **6e** (21 mg, 79% yield, 92% ee) was produced as a colorless oil from phosphonamidothioate **5e** (40 mg, 0.1 mmol, 94% ee, prepared via **General Procedure B**), methanol (0.5 mL), and *para*-tolylsulfonic acid monohydrate (57 mg, 0.3 mmol, 3 equiv.). The product was purified via flash column chromatography (0 to 60% Et<sub>2</sub>O in Hexanes). <sup>1</sup>H NMR (400 MHz, CDCl<sub>3</sub>) δ 7.92 – 7.72 (m, 2H), 7.64 – 7.53 (m, 1H), 7.48 (ddd, *J* = 8.4, 6.8, 4.4 Hz, 2H), 7.32 – 7.09 (m, 5H), 4.11 – 3.89 (m, 2H), 3.81 (d, *J* = 12.4 Hz, 3H); <sup>13</sup>C NMR (101 MHz, CDCl<sub>3</sub>) δ 137.23 (d, *J* = 5.1 Hz), 132.62 (d, *J* = 3.3 Hz), 132.07 (d, *J* = 151.1 Hz), 131.19 (d, *J* = 10.9 Hz), 128.74 (d, *J* = 29.5 Hz), 128.63, 128.48, 127.49, 52.23 (d, *J* = 6.9 Hz), 34.49 (d, *J* = 2.9 Hz); <sup>31</sup>P NMR (162 MHz, CDCl<sub>3</sub>) δ 45.65; HRMS (ESI) *m/z* calcd for C<sub>14</sub>H<sub>16</sub>O<sub>2</sub>PS (M+H)<sup>+</sup>: 279.0603; found: 279.0604. Phosphonothioate **6e** was determined to be 91% ee by chiral HPLC analysis (CHIRALPAK AS-H, 5% iPrOH/hexanes, 1.0 mL/min, 230 nm, *t*<sub>R</sub>(minor) = 41.3 min, *t*<sub>R</sub>(major) = 50.8 min).

#### **Racemic Sample:**

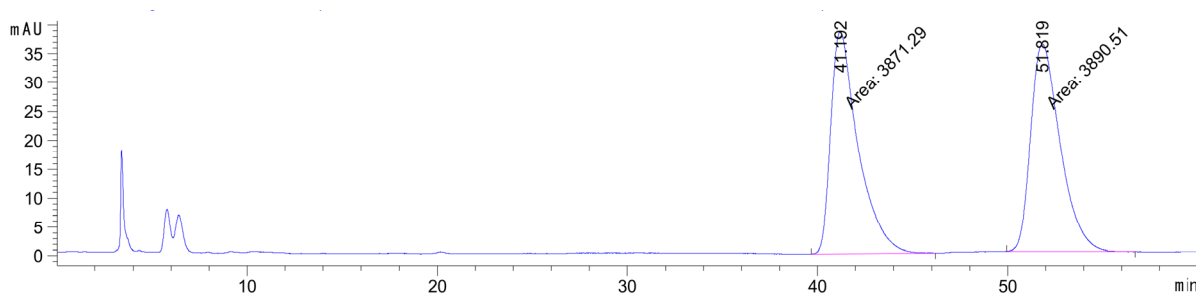

| Peak # | RetTime [min] | Type | Width [min] | Area [mAU*s] | Height [mAU] | Area %  |
|--------|---------------|------|-------------|--------------|--------------|---------|
| 1      | 41.192        | MM   | 1.6746      | 3871.28516   | 38.52939     | 49.8761 |
| 2      | 51.819        | MM   | 1.8013      | 3890.51367   | 35.99757     | 50.1239 |

### Enriched Sample:

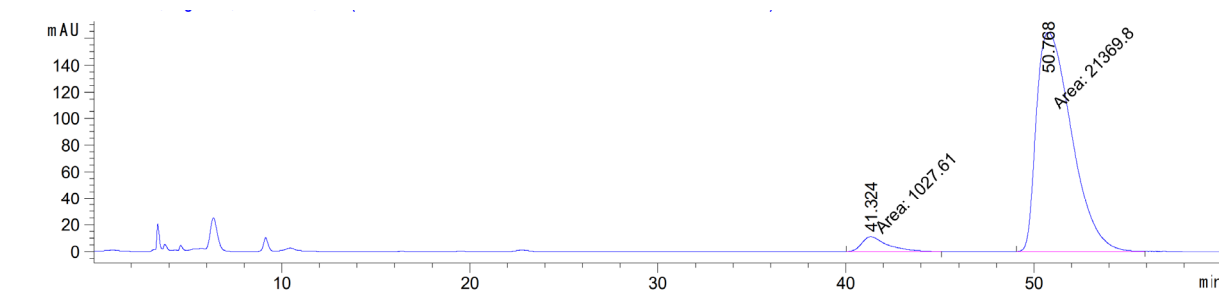

| Peak # | RetTime [min] | Type | Width [min] | Area [mAU*s] | Height [mAU] | Area %  |
|--------|---------------|------|-------------|--------------|--------------|---------|
| 1      | 41.324        | MM   | 1.5635      | 1027.60706   | 10.95381     | 4.5881  |
| 2      | 50.768        | MM   | 2.1658      | 2.13698e4    | 164.44994    | 95.4119 |

### Benzyl (*R*)-(methoxy(phenyl)phosphoryl)carbamate (**6f**)

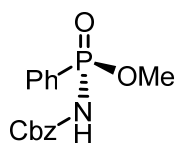

### **6f**

Following **General Procedure E**, phosphonamidate **6f** (27 mg, 86% yield, 92% ee) was produced as a colorless solid from compound **5f** (43 mg, 0.1 mmol, 92% ee), methanol (0.5 mL), and *para*-tolylsulfonic acid monohydrate (57 mg, 0.3 mmol, 3 equiv.). The product was purified via flash column chromatography (0 to 10% MeOH in DCM). <sup>1</sup>H NMR (400 MHz, CDCl<sub>3</sub>) δ 7.91 (ddt, *J*

= 14.0, 6.8, 1.4 Hz, 2H), 7.57 (td,  $J = 7.4, 1.5$  Hz, 1H), 7.45 (ddd,  $J = 8.7, 7.0, 4.4$  Hz, 2H), 7.35 – 7.30 (m, 3H), 7.23 (dd,  $J = 6.7, 3.0$  Hz, 2H), 6.30 (d,  $J = 7.0$  Hz, 1H), 5.07 (d,  $J = 2.3$  Hz, 2H), 3.84 (d,  $J = 11.7$  Hz, 3H);  $^{13}\text{C}$  NMR (101 MHz,  $\text{CDCl}_3$ )  $\delta$  152.86 (d,  $J = 5.3$  Hz), 135.11, 132.92 (d,  $J = 3.2$  Hz), 132.06 (d,  $J = 10.7$  Hz), 128.59, 128.49, 128.34, 128.21, 128.02 (d,  $J = 182.0$  Hz), 67.96, 52.04 (d,  $J = 6.3$  Hz);  $^{31}\text{P}$  NMR (162 MHz,  $\text{CDCl}_3$ )  $\delta$  16.09; HRMS (ESI)  $m/z$  calcd for  $\text{C}_{15}\text{H}_{17}\text{NO}_4\text{P}$  ( $\text{M}+\text{H}$ ) $^+$ : 306.0890; found: 306.0890. Phosphoramidate **6f** was determined to be 92% ee by chiral HPLC analysis (CHIRALPAK IB, 10% iPrOH/hexanes, 1.0 mL/min, 220 nm,  $t_{\text{R}}(\text{minor}) = 15.3$  min,  $t_{\text{R}}(\text{major}) = 18.6$  min).

### Racemic Sample:

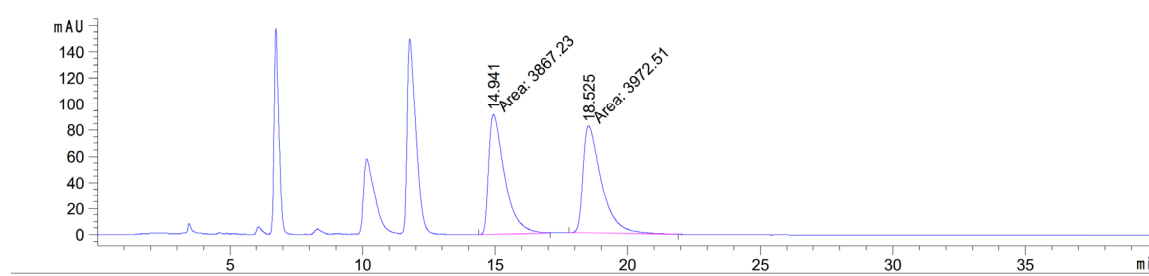

| Peak # | RetTime [min] | Type | Width [min] | Area [mAU*s] | Height [mAU] | Area %  |
|--------|---------------|------|-------------|--------------|--------------|---------|
| 1      | 14.941        | MM   | 0.7028      | 3867.23462   | 91.71310     | 49.3286 |
| 2      | 18.525        | MM   | 0.8071      | 3972.50635   | 82.03683     | 50.6714 |

### Enriched Sample:

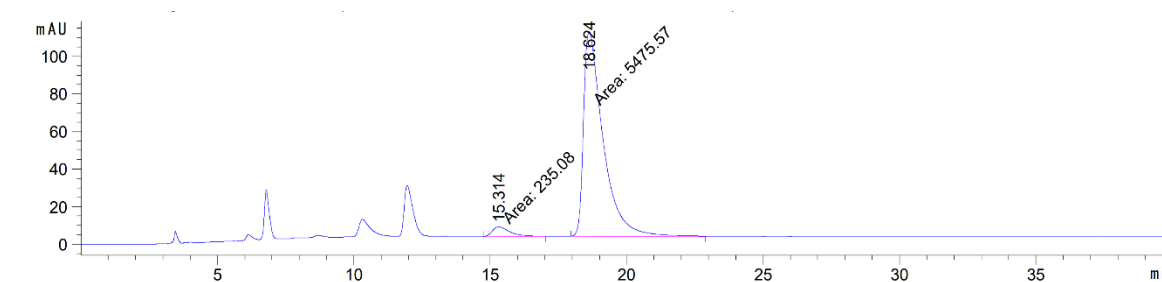

| Peak # | RetTime [min] | Type | Width [min] | Area [mAU*s] | Height [mAU] | Area %  |
|--------|---------------|------|-------------|--------------|--------------|---------|
| 1      | 15.314        | MM   | 0.7620      | 235.08018    | 5.14141      | 4.1165  |
| 2      | 18.624        | MM   | 0.8362      | 5475.56934   | 109.13271    | 95.8835 |

### Methyl (*R*)-(2-methoxyphenyl)(phenyl)phosphinate (**6g**)

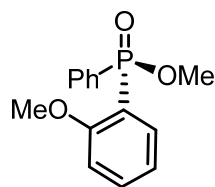

**6g**

Following **General Procedure E**, phosphinate **6g** (18 mg, 70% yield, 87% ee) was produced as a colorless oil from phosphinamidate **5g** (39 mg, 0.1 mmol), methanol (0.5 mL), and *para*-tolylsulfonic acid monohydrate (57 mg, 0.3 mmol, 3 equiv.). The product was purified via flash column chromatography (0 to 10% MeOH in DCM). <sup>1</sup>H NMR (400 MHz, CDCl<sub>3</sub>) δ 7.98 (ddd, *J* = 13.3, 7.6, 1.8 Hz, 1H), 7.90 – 7.79 (m, 2H), 7.50 (dddd, *J* = 9.5, 6.7, 2.3, 1.1 Hz, 2H), 7.46 – 7.36 (m, 2H), 7.07 (tdd, *J* = 7.5, 2.6, 0.9 Hz, 1H), 6.87 (dd, *J* = 8.3, 6.0 Hz, 1H), 3.76 (d, *J* = 11.4 Hz, 3H), 3.71 (s, 3H); <sup>13</sup>C NMR (101 MHz, CDCl<sub>3</sub>) δ 161.01 (d, *J* = 3.9 Hz), 134.81 (d, *J* = 6.3 Hz), 134.46 (d, *J* = 2.0 Hz), 132.00 (d, *J* = 142.6 Hz), 131.86, 131.79, 131.76, 128.04 (d, *J* = 13.6 Hz), 120.66 (d, *J* = 12.3 Hz), 111.26 (d, *J* = 7.9 Hz), 55.53, 51.42 (d, *J* = 6.1 Hz); <sup>31</sup>P NMR (162 MHz, CDCl<sub>3</sub>) δ 31.72; HRMS (ESI) *m/z* calcd for C<sub>14</sub>H<sub>16</sub>O<sub>3</sub>P (M+H)<sup>+</sup>: 263.0832; found: 263.0833. Phosphinate **6g** was determined to be 87% ee by chiral HPLC analysis (CHIRALPAK AD-H, 5% *i*PrOH/hexanes, 1.0 mL/min, 220 nm, *t*<sub>R</sub>(minor) = 57.8 min, *t*<sub>R</sub>(major) = 48.4 min).

### Racemic Sample:

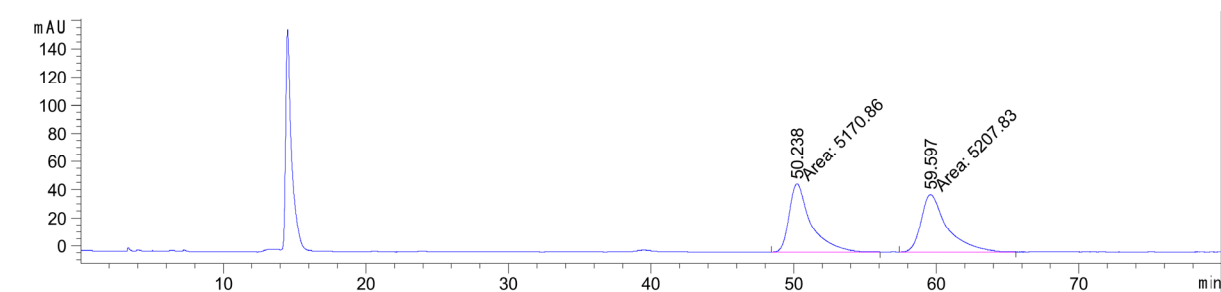

| Peak # | RetTime [min] | Type | Width [min] | Area [mAU*s] | Height [mAU] | Area %  |
|--------|---------------|------|-------------|--------------|--------------|---------|
| 1      | 50.238        | MM   | 1.7740      | 5170.85547   | 48.58001     | 49.8219 |
| 2      | 59.597        | MM   | 2.1236      | 5207.82520   | 40.87336     | 50.1781 |

### Enriched Sample:

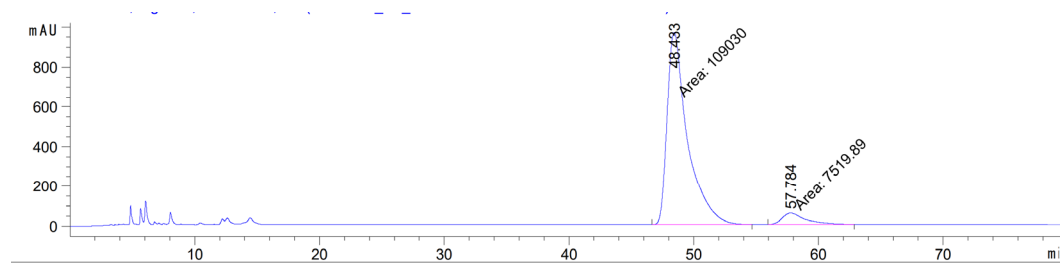

| Peak # | RetTime [min] | Type | Width [min] | Area [mAU*s] | Height [mAU] | Area %  |
|--------|---------------|------|-------------|--------------|--------------|---------|
| 1      | 48.433        | MM   | 1.8838      | 1.09030e5    | 964.60413    | 93.5479 |
| 2      | 57.784        | MM   | 2.1621      | 7519.89063   | 57.96749     | 6.4521  |

### Methyl (*S*)-methyl(phenyl)phosphinate (**6h**)

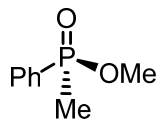

**6h**

Phosphinamidate **5h** (29.5 mg, 0.1 mmol, 1 equiv.) was added to a 1-dram vial equipped with a magnetic stir bar. 25 mg of H<sub>3</sub>PO<sub>3</sub> (0.3 mmol, 3 equiv.) was then dissolved in methanol (1 mL) and added to the vial, which was then capped with a septum and sealed with parafilm. The resulting solution was subjected to stirring at room temperature for 48 hours. The product was then purified via flash column chromatography on silica gel (0 to 10% MeOH in DCM). Phosphinate **6h** (8 mg, 48% yield, 89% ee) was afforded as a colorless oil. <sup>1</sup>H NMR (400 MHz, CDCl<sub>3</sub>) δ 7.88 – 7.72 (m, 2H), 7.62 – 7.52 (m, 1H), 7.55 – 7.42 (m, 2H), 3.61 (d, *J* = 11.3 Hz, 3H), 1.67 (d, *J* = 14.6 Hz, 3H); <sup>13</sup>C NMR (101 MHz, CDCl<sub>3</sub>) δ 132.37 (d, *J* = 2.8 Hz), 131.33 (d, *J* = 10.2 Hz), 131.04 (d, *J* = 126.8 Hz), 128.72 (d, *J* = 12.6 Hz), 51.04 (d, *J* = 6.2 Hz), 15.53 (d, *J* = 103.2 Hz); <sup>31</sup>P NMR (162 MHz, CDCl<sub>3</sub>) δ 44.07; HRMS (ESI) *m/z* calcd for C<sub>8</sub>H<sub>12</sub>O<sub>2</sub>P (M+H)<sup>+</sup>: 171.0569; found: 171.0569. Phosphinate **6h** was determined to be 89% ee by chiral HPLC analysis (CHIRALPAK AS-H, 10% iPrOH/hexanes, 1.0 mL/min, 210 nm, *t*<sub>R</sub>(minor) = 43.2 min, *t*<sub>R</sub>(major) = 32.2 min).

### Racemic Sample:

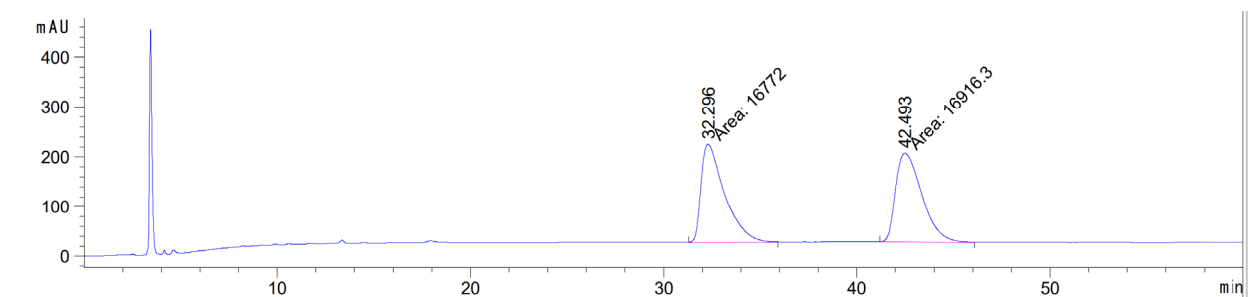

| Peak # | RetTime [min] | Type | Width [min] | Area [mAU*s] | Height [mAU] | Area %  |
|--------|---------------|------|-------------|--------------|--------------|---------|
| 1      | 32.296        | MM   | 1.4131      | 1.67720e4    | 197.81993    | 49.7858 |
| 2      | 42.493        | MM   | 1.5762      | 1.69163e4    | 178.87239    | 50.2142 |

### Enriched Sample:



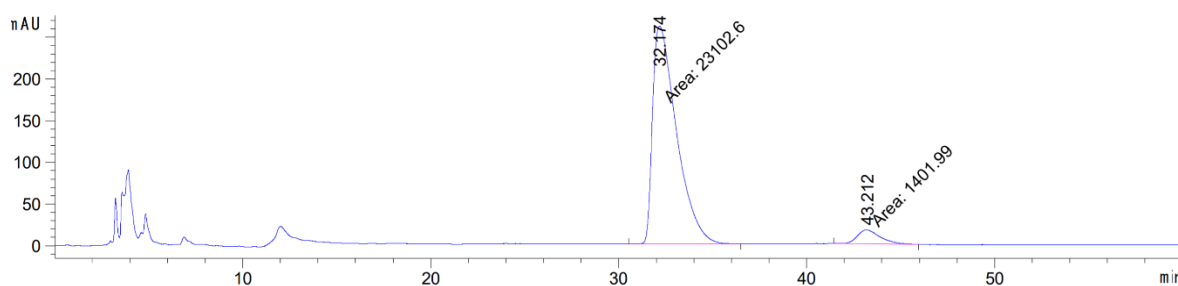

| Peak # | RetTime [min] | Type | Width [min] | Area [mAU*s] | Height [mAU] | Area %  |
|--------|---------------|------|-------------|--------------|--------------|---------|
| 1      | 32.174        | MM   | 1.4762      | 2.31026e4    | 260.83728    | 94.2787 |
| 2      | 43.212        | MM   | 1.3991      | 1401.99255   | 16.70129     | 5.7213  |

### ***O*-ethyl *S*-phenyl (*R*)-phenylphosphonothioate (**6i**)**

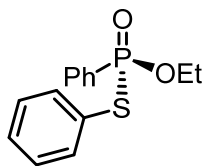

**6i**

Following **General Procedure E**, phosphonothioate **6i** (14 mg, 58% yield, 92% ee) was produced as a colorless oil from phosphonamidothioate **5d** (39 mg, 0.1 mmol, 93% ee), ethanol (0.5 mL), and *para*-tolylsulfonic acid monohydrate (57 mg, 0.3 mmol, 3 equiv.) for a 72-hour reaction time. The product was purified via flash column chromatography (slow gradient of 0 to 60% Et<sub>2</sub>O in Hexanes). <sup>1</sup>H NMR (400 MHz, CDCl<sub>3</sub>) δ 7.65 (ddt, *J* = 13.6, 6.8, 1.4 Hz, 2H), 7.56 – 7.44 (m, 1H), 7.44 – 7.32 (m, 2H), 7.32 – 7.25 (m, 3H), 7.20 (dd, *J* = 8.3, 6.3 Hz, 2H), 4.64 – 4.14 (m, 2H), 1.49 – 1.34 (m, 3H); <sup>13</sup>C NMR (101 MHz, CDCl<sub>3</sub>) δ 135.52 (d, *J* = 4.3 Hz), 132.49 (d, *J* = 3.2 Hz), 131.56 (d, *J* = 150.6 Hz), 131.46 (d, *J* = 10.7 Hz), 129.12 (d, *J* = 2.3 Hz), 128.97 (d, *J* = 2.7 Hz), 128.20 (d, *J* = 14.9 Hz), 126.68 (d, *J* = 5.6 Hz), 62.47 (d, *J* = 6.9 Hz), 16.35 (d, *J* = 6.8 Hz);

$^{31}\text{P}$  NMR (162 MHz,  $\text{CDCl}_3$ )  $\delta$  41.66 ; HRMS (ESI)  $m/z$  calcd for  $\text{C}_{14}\text{H}_{16}\text{O}_2\text{PS}$  ( $\text{M}+\text{H}$ ) $^+$ : 279.0603; found: 279.0604. Phosphonothioate **6i** was determined to be 92% ee by chiral HPLC analysis (CHIRALPAK AD-H, 10% *i*PrOH/hexanes, 1.0 mL/min, 230 nm,  $t_{\text{R}}$ (minor) = 11.2 min,  $t_{\text{R}}$ (major) = 14.6 min).

### Racemic Sample:

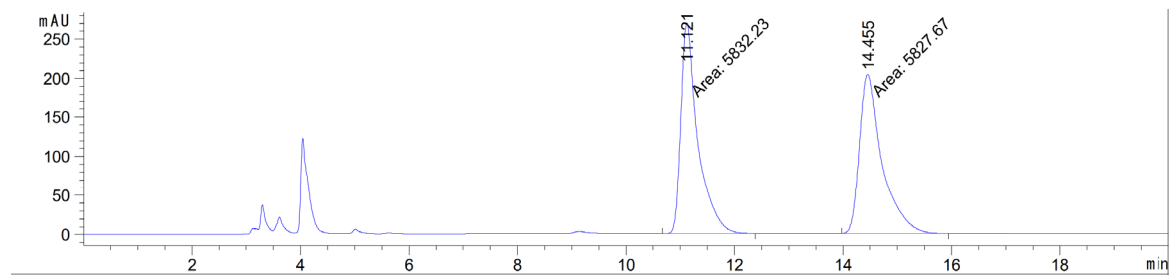

| Peak # | RetTime [min] | Type | Width [min] | Area [mAU*s] | Height [mAU] | Area %  |
|--------|---------------|------|-------------|--------------|--------------|---------|
| 1      | 11.121        | MM   | 0.3613      | 5832.23145   | 269.06909    | 50.0196 |
| 2      | 14.455        | MM   | 0.4759      | 5827.66846   | 204.07596    | 49.9804 |

### Enriched Sample:

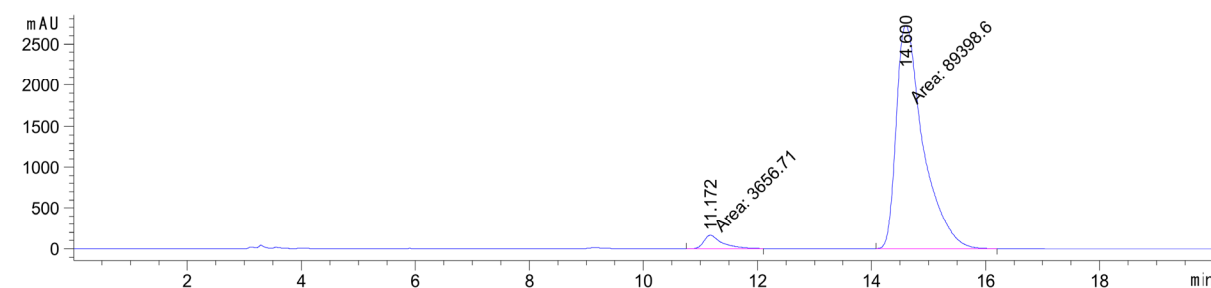

| Peak # | RetTime [min] | Type | Width [min] | Area [mAU*s] | Height [mAU] | Area %  |
|--------|---------------|------|-------------|--------------|--------------|---------|
| 1      | 11.172        | MM   | 0.3710      | 3656.70728   | 164.25067    | 3.9296  |
| 2      | 14.600        | MM   | 0.5490      | 8.93986e4    | 2714.03076   | 96.0704 |

***S*-phenyl *O*-(prop-2-yn-1-yl) (*R*)-phenylphosphonothioate (**6j**)**

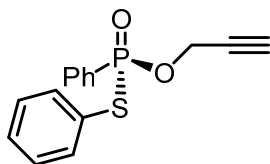

**6j**

Following **General Procedure E**, phosphonothioate **6j** (14 mg, 49% yield, 81% ee) was produced as a colorless oil from phosphonamidothioate **5d** (39 mg, 0.1 mmol, 93% ee), propargyl alcohol (0.5 mL), and *para*-tolylsulfonic acid monohydrate (57 mg, 0.3 mmol, 3 equiv.) for a 48-hour reaction time. The product was purified via flash column chromatography (slow gradient of 0 to 50% Et<sub>2</sub>O in Hexanes). <sup>1</sup>H NMR (400 MHz, CDCl<sub>3</sub>) δ 7.66 (ddt, *J* = 13.9, 6.8, 1.4 Hz, 2H), 7.58 – 7.44 (m, 1H), 7.41 – 7.27 (m, 5H), 7.22 (dd, *J* = 8.3, 6.9 Hz, 2H), 5.07 – 4.68 (m, 2H), 2.58 (t, *J* = 2.5 Hz, 1H) ; <sup>13</sup>C NMR (101 MHz, CDCl<sub>3</sub>) δ 135.73 (d, *J* = 4.3 Hz), 132.83 (d, *J* = 3.3 Hz), 131.49 (d, *J* = 10.9 Hz), 130.68 (d, *J* = 148.8 Hz), 129.25 (d, *J* = 1.9 Hz), 129.22 (d, *J* = 2.5 Hz), 128.28 (d, *J* = 15.0 Hz), 125.91 (d, *J* = 5.7 Hz), 77.66 (d, *J* = 9.2 Hz), 76.27, 53.32 (d, *J* = 5.6 Hz) ; <sup>31</sup>P NMR (162 MHz, CDCl<sub>3</sub>) δ 44.39 ; HRMS (ESI) *m/z* calcd for C<sub>15</sub>H<sub>14</sub>O<sub>2</sub>PS (M+H)<sup>+</sup>: 289.0447; found: 289.0447. Phosphonothioate **6j** was determined to be 81% ee by chiral HPLC analysis (CHIRALPAK IB, 3% *i*PrOH/hexanes, 1.0 mL/min, 210 nm, *t*<sub>R</sub>(minor) = 29.6 min, *t*<sub>R</sub>(major) = 31.7 min).

**Racemic Sample:**

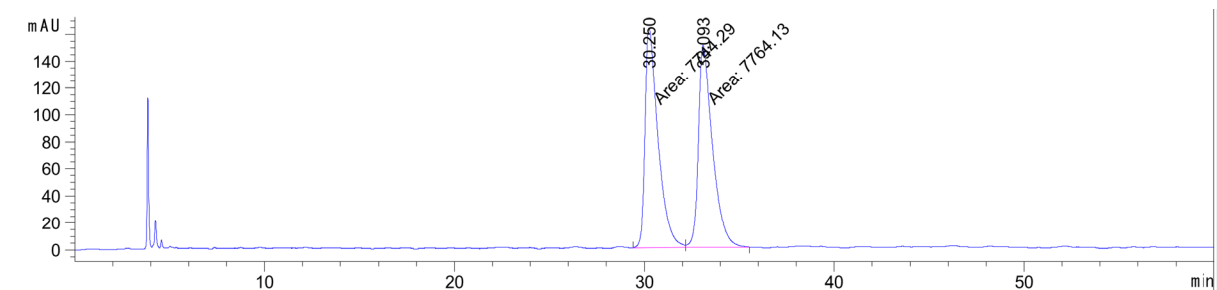

| Peak # | RetTime [min] | Type | Width [min] | Area [mAU*s] | Height [mAU] | Area %  |
|--------|---------------|------|-------------|--------------|--------------|---------|
| 1      | 30.250        | MF   | 0.7928      | 7744.29395   | 162.80408    | 49.9360 |
| 2      | 33.093        | FM   | 0.8633      | 7764.13330   | 149.89427    | 50.0640 |

### Enriched Sample:

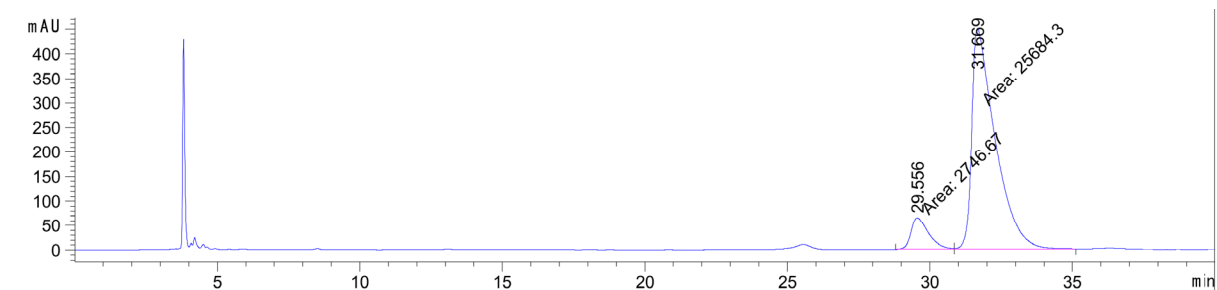

| Peak # | RetTime [min] | Type | Width [min] | Area [mAU*s] | Height [mAU] | Area %  |
|--------|---------------|------|-------------|--------------|--------------|---------|
| 1      | 29.556        | MF   | 0.7082      | 2746.66553   | 64.64251     | 9.6608  |
| 2      | 31.669        | FM   | 0.9521      | 2.56843e4    | 449.61768    | 90.3392 |

### *O*-allyl *S*-phenyl (*R*)-phenylphosphonothioate (6k)

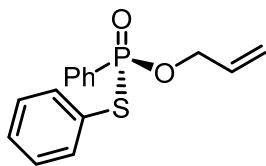

6k

Following **General Procedure E**, phosphonothioate **6k** (16 mg, 55% yield, 91% ee) was afforded as a colorless oil from phosphonamidothioate **5d** (39 mg, 0.1 mmol, 93% ee), allyl alcohol (0.5 mL), and *para*-tolylsulfonic acid monohydrate (57 mg, 0.3 mmol, 3 equiv.) for a 48-hour reaction time. The product was purified via flash column chromatography on silica gel (slow gradient of 0 to 50% Et<sub>2</sub>O in Hexanes). <sup>1</sup>H NMR (400 MHz, CDCl<sub>3</sub>) δ 7.63 (ddt, *J* = 13.6, 6.9, 1.3 Hz, 2H), 7.51 – 7.40 (m, 1H), 7.34 (tdd, *J* = 7.8, 5.5, 3.1 Hz, 2H), 7.30 – 7.22 (m, 3H), 7.17 (dd, *J* = 8.5, 6.6 Hz, 2H), 5.96 (ddt, *J* = 17.2, 10.6, 5.5 Hz, 1H), 5.35 (dq, *J* = 17.1, 1.5 Hz, 1H), 5.25 (dq, *J* = 10.5, 1.3 Hz, 1H), 4.74 (ddt, *J* = 8.4, 5.5, 1.4 Hz, 2H); <sup>13</sup>C NMR (101 MHz, CDCl<sub>3</sub>) δ 135.61 (d, *J* = 4.2 Hz), 132.60 (d, *J* = 3.3 Hz), 132.51 (d, *J* = 7.5 Hz), 131.47 (d, *J* = 10.6 Hz), 131.30 (d, *J* = 150.1 Hz), 129.16 (d, *J* = 2.3 Hz), 129.05 (d, *J* = 2.9 Hz), 128.24 (d, *J* = 15.0 Hz), 126.44 (d, *J* = 5.7 Hz), 118.46, 66.41 (d, *J* = 6.6 Hz); <sup>31</sup>P NMR (162 MHz, CDCl<sub>3</sub>) δ 42.47; HRMS (ESI) *m/z* calcd for C<sub>15</sub>H<sub>16</sub>O<sub>2</sub>PS (M+H)<sup>+</sup>: 291.0603; found: 291.0605. Phosphonothioate **6k** was determined to be 91% ee by chiral HPLC analysis (CHIRALPAK IB, 3% iPrOH/hexanes, 1.0 mL/min, 220 nm, *t*<sub>R</sub>(minor) = 19.9 min, *t*<sub>R</sub>(major) = 22.9 min).

### Racemic Sample:

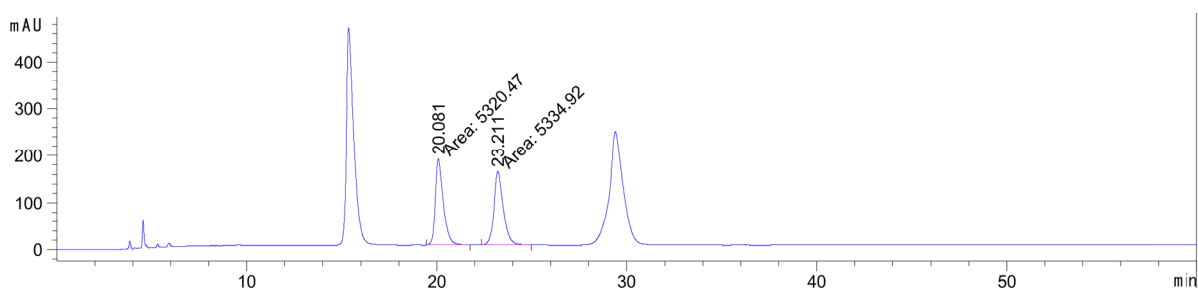

| Peak # | RetTime [min] | Type | Width [min] | Area [mAU*s] | Height [mAU] | Area %  |
|--------|---------------|------|-------------|--------------|--------------|---------|
| 1      | 20.081        | MM   | 0.4866      | 3925.65991   | 134.46416    | 49.8875 |
| 2      | 23.211        | MM   | 0.5716      | 3943.36353   | 114.98200    | 50.1125 |

**Enriched Sample:**

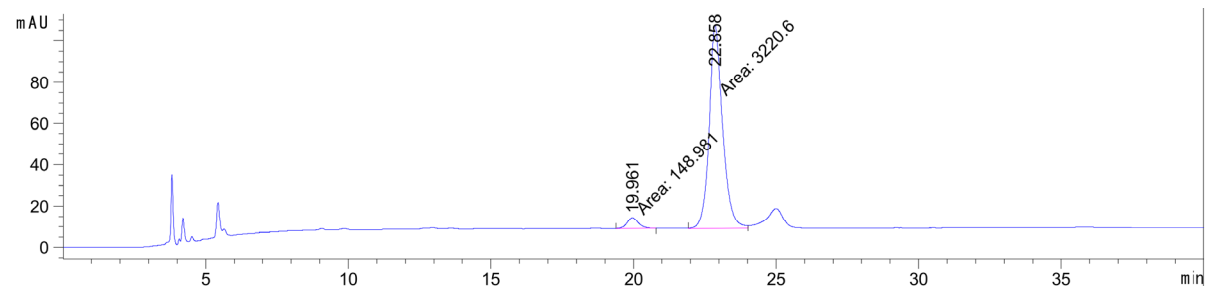

| Peak # | RetTime [min] | Type | Width [min] | Area [mAU*s] | Height [mAU] | Area %  |
|--------|---------------|------|-------------|--------------|--------------|---------|
| 1      | 19.961        | MM   | 0.4631      | 148.98062    | 5.36222      | 4.4213  |
| 2      | 22.858        | MF   | 0.5458      | 3220.59521   | 98.34910     | 95.5787 |

## Stereospecific phosphorylation of precious alcohols with phosphonothioate **6d**

**((3a*R*,4*R*,6*R*,6a*R*)-6-(6-benzamido-9*H*-purin-9-yl)-2,2-dimethyltetrahydrofuro[3,4-  
d][1,3]dioxol-4-yl)methyl methyl (*S*)-phenylphosphonate (**7a**)**

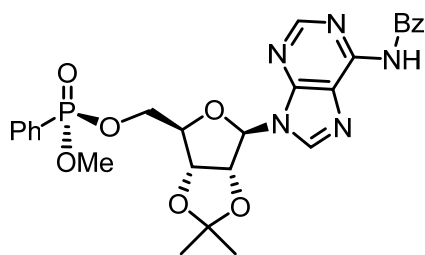

**7a**

Following **General Procedure F**, phosphonate **7a** (32.3 mg, 57% yield, 27:1 dr) was produced as a white solid from phosphonothioate **6d** (26.2 mg, 0.1 mmol, 1 equiv.) and N6-Benzoyl-2',3'-isopropylideneadenosine (41 mg, 0.1 mmol, 1 equiv.). The product was purified via flash chromatography on silica gel. First, ten column volumes of 100% ethyl acetate were passed through the column to remove thiophenol and any remaining starting materials. Then, a gradient of 0 to 10% MeOH in DCM was used to elute the product. <sup>1</sup>H NMR (400 MHz, CDCl<sub>3</sub>) δ 9.03 (s, 1H), 8.74 (s, 1H), 8.17 (s, 1H), 8.07 – 7.99 (m, 2H), 7.77 – 7.65 (m, 2H), 7.64 – 7.59 (m, 1H), 7.58 – 7.49 (m, 3H), 7.40 (td, *J* = 7.7, 4.4 Hz, 2H), 6.19 (d, *J* = 2.4 Hz, 1H), 5.43 (dd, *J* = 6.2, 2.5 Hz, 1H), 5.10 (dd, *J* = 6.3, 2.8 Hz, 1H), 4.55 (td, *J* = 4.4, 2.6 Hz, 1H), 4.30 – 4.19 (m, 2H), 3.68 (d, *J* = 11.2 Hz, 3H), 1.62 (s, 3H), 1.41 (s, 3H); <sup>13</sup>C NMR (101 MHz, CDCl<sub>3</sub>) δ 152.72, 151.13, 149.59, 141.89, 133.59, 133.00 (d, *J* = 3.0 Hz), 132.89, 131.81 (d, *J* = 10.1 Hz), 128.93, 128.62 (d, *J* = 15.2 Hz), 127.88, 126.21 (d, *J* = 188.2 Hz), 123.41, 114.70, 91.54, 85.59 (d, *J* = 7.4 Hz), 84.34, 81.51, 65.23 (d, *J* = 5.2 Hz), 52.95 (d, *J* = 5.2 Hz), 27.16, 25.38; <sup>31</sup>P NMR (162 MHz, CDCl<sub>3</sub>) δ 21.14. HRMS (ESI) *m/z* calcd for C<sub>27</sub>H<sub>29</sub>N<sub>5</sub>O<sub>7</sub>P (M+H)<sup>+</sup>: 566.1799; found: 566.1794. D.r. of

phosphonate **7a** was determined to be 27:1 by  $^{31}\text{P}$  NMR 162 MHz,  $\text{CDCl}_3$  with a 10-second relaxation delay. (Major:  $\delta$  21.14, Minor:  $\delta$  21.29).

### 1:1 Mixture of Diastereomers:

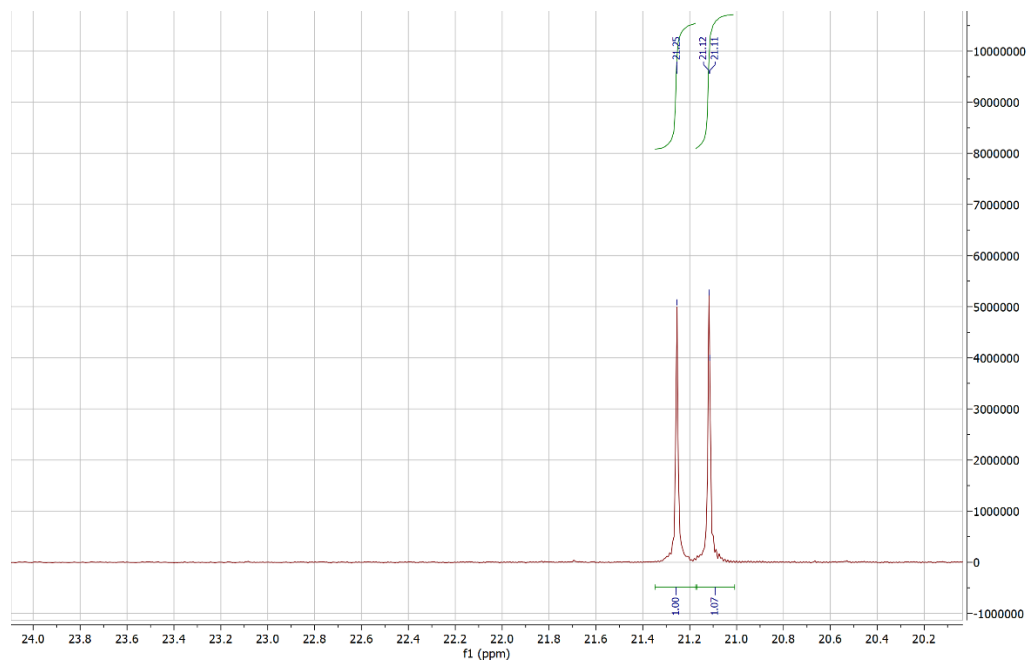

### Compound **7a**:

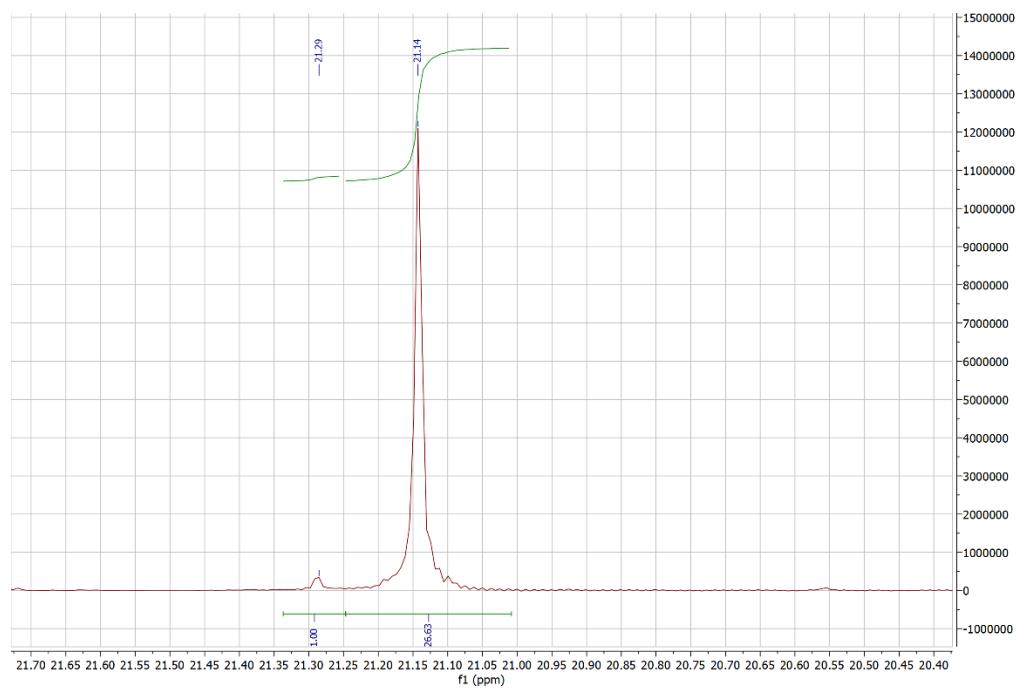



**Methyl *N*-((benzyloxy)carbonyl)-*O*-((*S*)-methoxy(phenyl)phosphoryl)-*L*-threoninate (**7b**)**

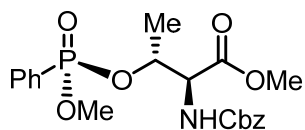

**7b**

Following **General Procedure F**, phosphonate **7b** (29 mg, 70% yield, 23:1 dr) was produced as a colorless liquid from phosphonothioate **6d** (26.2 mg, 0.1 mmol, 1 equiv.) and *N*-Z-*L*-threonine methyl ester (33 mg, 0.125 mmol, 1.25 equiv.). The product was purified via flash column chromatography on silica gel (0 to 100% Et<sub>2</sub>O in Hexanes with 50% DCM additive throughout). <sup>1</sup>H NMR (400 MHz, CDCl<sub>3</sub>) δ 7.62 (ddd, *J* = 13.5, 8.2, 1.4 Hz, 2H), 7.50 – 7.40 (m, 1H), 7.35 (ddd, *J* = 8.4, 7.0, 4.5 Hz, 2H), 7.33 – 7.08 (m, 5H), 5.48 (d, *J* = 9.6 Hz, 1H), 5.07 – 4.94 (m, 3H), 4.32 (dt, *J* = 9.6, 2.2 Hz, 1H), 3.61 (d, *J* = 11.3 Hz, 3H), 3.31 (s, 3H), 1.38 (d, *J* = 6.3 Hz, 3H); <sup>13</sup>C NMR (101 MHz, CDCl<sub>3</sub>) δ 169.87, 156.56, 136.05, 132.71 (d, *J* = 3.1 Hz), 131.81 (d, *J* = 10.0 Hz), 128.61, 128.58, 128.37 (d, *J* = 16.8 Hz), 128.15, 125.90 (d, *J* = 74.8 Hz), 73.85 (d, *J* = 5.6 Hz), 67.35, 58.60 (d, *J* = 6.8 Hz), 52.56 (d, *J* = 5.6 Hz), 52.43, 19.31; <sup>31</sup>P NMR (162 MHz, CDCl<sub>3</sub>) δ 20.35; HRMS (ESI) *m/z* calcd for C<sub>20</sub>H<sub>25</sub>NO<sub>7</sub>P (M+H)<sup>+</sup>: 422.1363; found: 422.1362. Phosphonate **7b** was determined to be 23:1 d.r. by <sup>31</sup>P NMR 162 MHz, CDCl<sub>3</sub> with a 10-second relaxation delay (Major: δ 20.34, Minor: δ 19.75).

## 1:1 Mixture of Diastereomers:

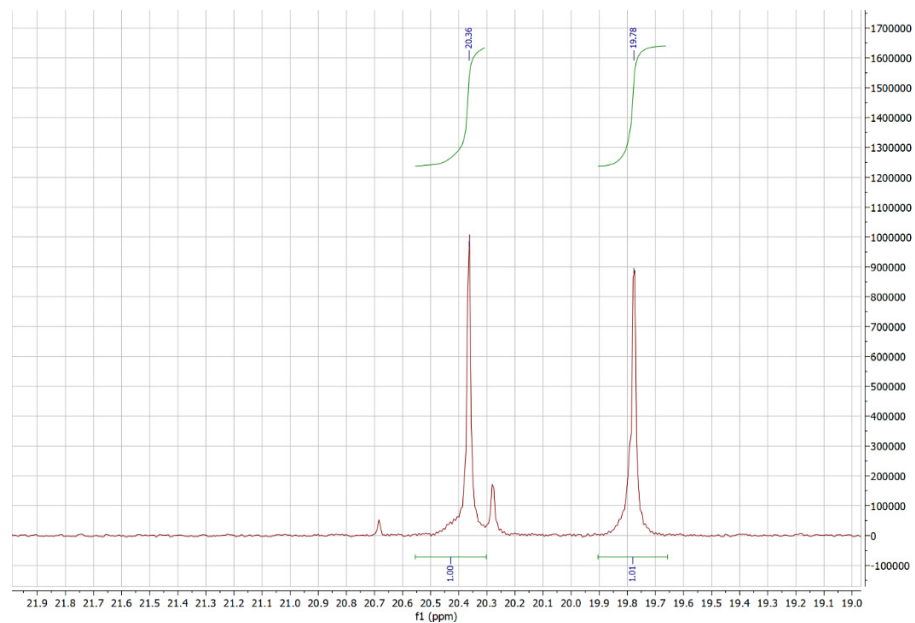

## Compound 7b:

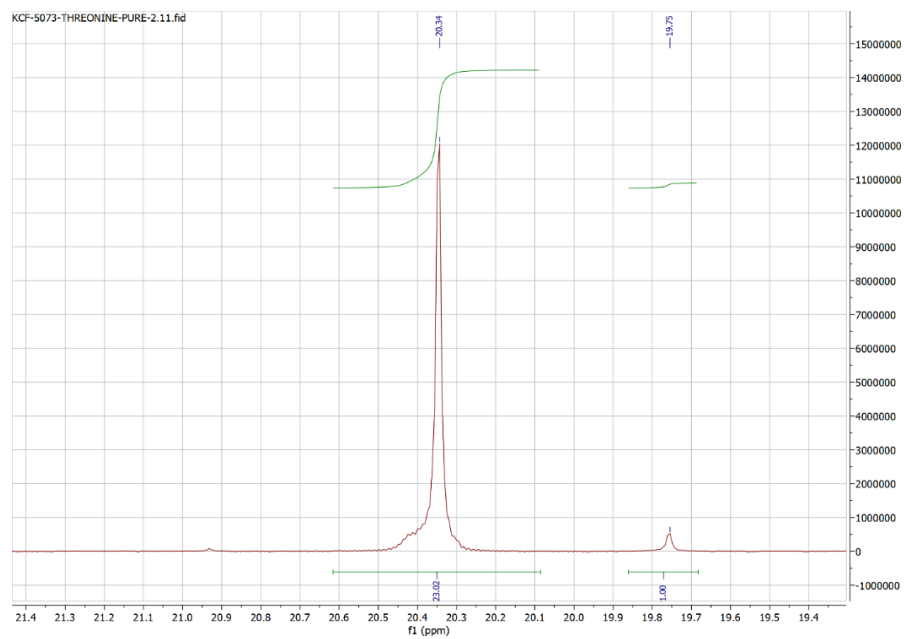

**Methyl *N*-((benzyloxy)carbonyl)-*O*-((*S*)-methoxy(phenyl)phosphoryl)-*L*-serinate (**7c**)**

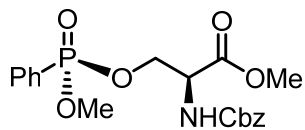

**7c**

Following **General Procedure F**, phosphonate **7c** (21 mg, 52% yield, 31:1 dr) was produced as a colorless liquid from phosphonothioate **6d** (26.2 mg, 0.1 mmol, 1 equiv.) and *N*-Z-*L*-serine methyl ester (32 mg, 0.125 mmol, 1.25 equiv.). The product was purified via flash column chromatography on silica gel (slow gradient of 0 to 100% Et<sub>2</sub>O in Hexanes with 50% DCM additive throughout). <sup>1</sup>H NMR (400 MHz, CDCl<sub>3</sub>) δ 7.74 (ddd, *J* = 13.5, 8.3, 1.4 Hz, 2H), 7.65 – 7.53 (m, 1H), 7.46 (ddd, *J* = 8.6, 6.9, 4.4 Hz, 2H), 7.40 – 7.28 (m, 5H), 6.01 (d, *J* = 8.3 Hz, 1H), 5.12 (s, 2H), 4.57 (dd, *J* = 6.9, 3.7 Hz, 1H), 4.44 (ddd, *J* = 10.9, 8.9, 3.4 Hz, 1H), 4.33 (ddd, *J* = 10.8, 6.5, 2.9 Hz, 1H), 3.74 (d, *J* = 11.2 Hz, 3H), 3.68 (s, 3H); <sup>13</sup>C NMR (101 MHz, CDCl<sub>3</sub>) δ 169.52, 155.89, 136.15, 132.96 (d, *J* = 3.1 Hz), 131.88 (d, *J* = 10.1 Hz), 128.65 (d, *J* = 15.3 Hz), 128.55, 128.23, 128.14, 126.44 (d, *J* = 190.0 Hz), 67.18, 65.84 (d, *J* = 4.9 Hz), 54.55 (d, *J* = 6.0 Hz), 52.88 (d, *J* = 5.6 Hz), 29.72; <sup>31</sup>P NMR (162 MHz, CDCl<sub>3</sub>) δ 21.42; HRMS (ESI) *m/z* calcd for C<sub>19</sub>H<sub>23</sub>NO<sub>7</sub>P (M+H)<sup>+</sup>: 408.1207; found: 408.1204. Phosphonate **7c** was determined to be 31:1 d.r. by <sup>31</sup>P NMR (162 MHz, CDCl<sub>3</sub>) with a 10-second relaxation delay (Major: δ 21.42, Minor: δ 21.09).

## 1:1 Mixture of Diastereomers:

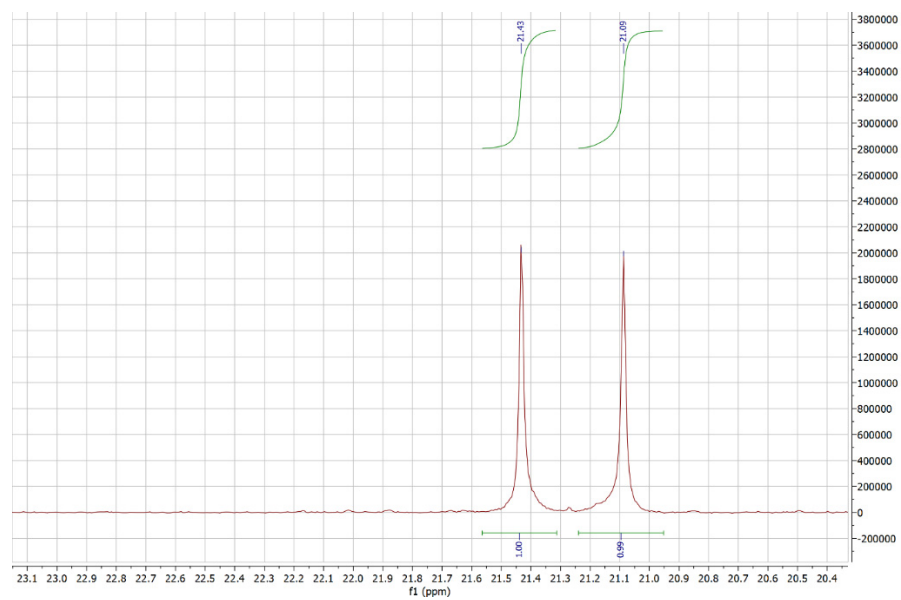

## Compound 7c:

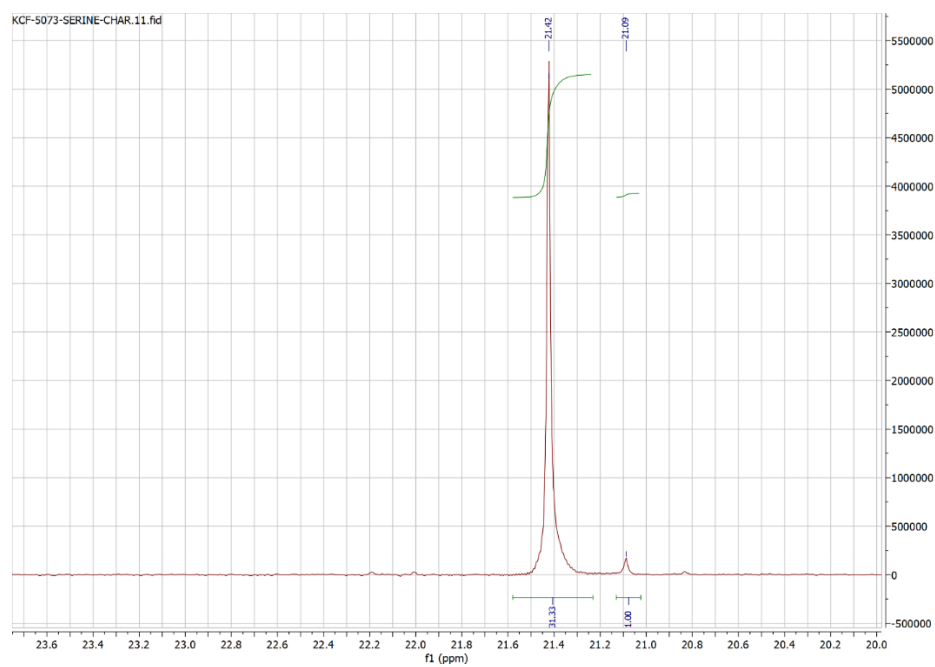

# Enantiospecific Substitution of Phosphonate **6b** with Organomagnesium Reagents

## Methyl (*R*)-methyl(phenyl)phosphinate (**8a**)

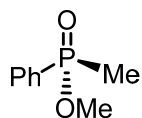

**8a**

Following **General Procedure G**, phosphinate **8a** (15 mg, 88% yield, 92% ee) was produced as a colorless oil from phosphonate **6b** (32 mg, 0.1 mmol, 93% ee) and methylmagnesium chloride (50  $\mu$ L, 0.1 mmol, 1 equiv., 2 M solution in THF). The product was purified using flash column chromatography on silica gel (0 to 10% MeOH in DCM). Phosphinate **8a** was determined to be 92% ee by chiral HPLC analysis (CHIRALPAK AS-H, 10% iPrOH/hexanes, 1.0 mL/min, 210 nm,  $t_{R(\text{minor})}$  = 34.8 min,  $t_{R(\text{major})}$  = 45.0 min).  $[\alpha]_D^{22}$  = +87.5 ( $c$  = 4 mg/mL, C<sub>6</sub>H<sub>6</sub>). Absolute stereochemistry was assigned by comparison to literature value (14).

### Racemic Sample:

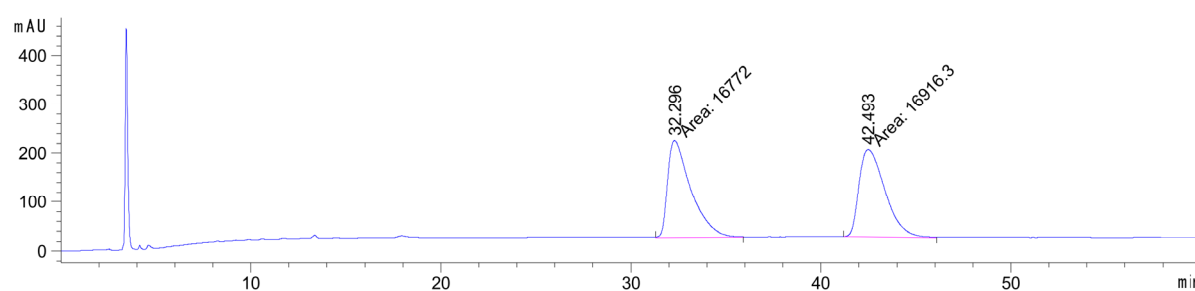

| Peak # | RetTime [min] | Type | Width [min] | Area [mAU*s] | Height [mAU] | Area %  |
|--------|---------------|------|-------------|--------------|--------------|---------|
| 1      | 32.296        | MM   | 1.4131      | 1.67720e4    | 197.81993    | 49.7858 |
| 2      | 42.493        | MM   | 1.5762      | 1.69163e4    | 178.87239    | 50.2142 |

### Enriched Sample:

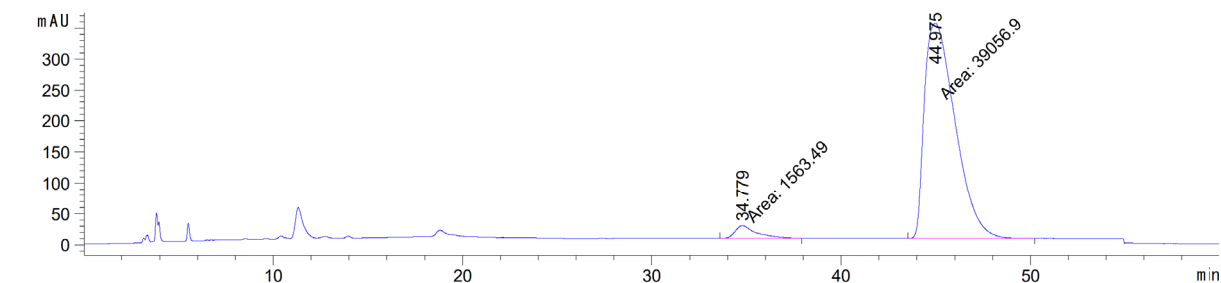

| Peak # | RetTime [min] | Type | Width [min] | Area [mAU*s] | Height [mAU] | Area %  |
|--------|---------------|------|-------------|--------------|--------------|---------|
| 1      | 34.779        | MM   | 1.2892      | 1563.48840   | 20.21192     | 3.8490  |
| 2      | 44.975        | MM   | 1.8771      | 3.90569e4    | 346.79221    | 96.1510 |

### Isopropyl (*R*)-methyl(phenyl)phosphinate (**8b**)

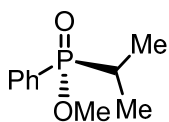

**8b**

Following **General Procedure G**, phosphinate **8b** (9.4 mg, 95% yield, 91% ee) was produced as a colorless oil from phosphonate **6b** (16 mg, 0.05 mmol, 92% ee) and isopropylmagnesium chloride lithium chloride complex (120  $\mu$ L, 0.06 mmol, 1.2 equiv., 0.5 M solution in THF). The product was purified using flash column chromatography (0 to 10% MeOH in DCM).  $^1\text{H}$  NMR (400 MHz,  $\text{CDCl}_3$ )  $\delta$  7.96 – 7.71 (m, 2H), 7.61 – 7.51 (m, 1H), 7.46 (tdd,  $J = 7.1, 4.2, 1.9$  Hz, 2H), 4.74 (dhept,  $J = 7.7, 6.2$  Hz, 1H), 3.72 (d,  $J = 11.2$  Hz, 3H), 1.39 (d,  $J = 6.1$  Hz, 3H), 1.26 (d,  $J =$

6.2 Hz, 3H);  $^{13}\text{C}$  NMR (101 MHz,  $\text{CDCl}_3$ )  $\delta$  132.35 (d,  $J = 3.1$  Hz), 131.80 (d,  $J = 9.8$  Hz), 128.45 (d,  $J = 188.7$  Hz), 128.45 (d,  $J = 15.0$  Hz), 71.13 (d,  $J = 5.7$  Hz), 52.39 (d,  $J = 5.5$  Hz), 23.97 (dd,  $J = 22.9, 4.4$  Hz);  $^{31}\text{P}$  NMR (162 MHz,  $\text{CDCl}_3$ )  $\delta$  19.12; HRMS (ESI)  $m/z$  calcd for  $\text{C}_{10}\text{H}_{16}\text{O}_2\text{P}$  ( $\text{M}+\text{H}$ ) $^+$ : 199.0882; found: 199.0882. Phosphinate **8b** was determined to be 91% ee by chiral HPLC analysis (CHIRALPAK IA, 1.0% iPrOH/hexanes, 1.0 mL/min, 220 nm,  $t_{\text{R}}(\text{minor}) = 28.1$  min,  $t_{\text{R}}(\text{major}) = 30.3$  min).

### Racemic Sample:

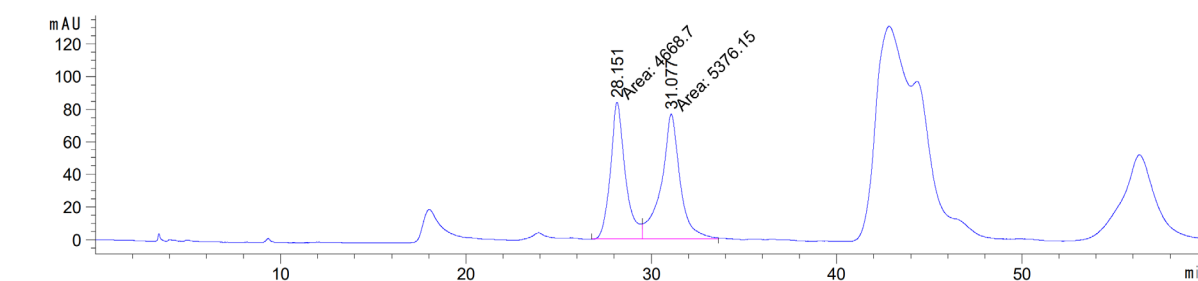

| Peak # | RetTime [min] | Type | Width [min] | Area [mAU*s] | Height [mAU] | Area %  |
|--------|---------------|------|-------------|--------------|--------------|---------|
| 1      | 28.151        | MF   | 0.9290      | 4668.70068   | 83.76037     | 46.4786 |
| 2      | 31.077        | FM   | 1.1727      | 5376.14551   | 76.40487     | 53.5214 |

### Enriched Sample:

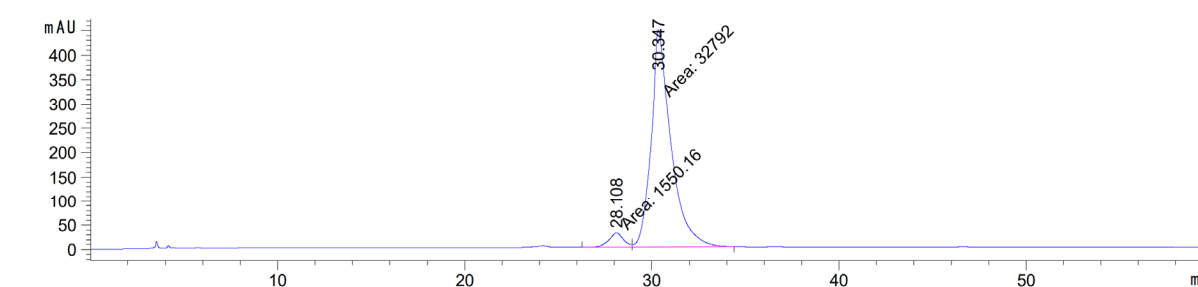

| Peak # | RetTime [min] | Type | Width [min] | Area [mAU*s] | Height [mAU] | Area %  |
|--------|---------------|------|-------------|--------------|--------------|---------|
| 1      | 28.108        | MF   | 0.8843      | 1550.15649   | 29.21516     | 4.5139  |
| 2      | 30.347        | FM   | 1.2249      | 3.27920e4    | 446.17682    | 95.4861 |

### Methyl (*S*)-(2-methoxyphenyl)(phenyl)phosphinate (**8c**)

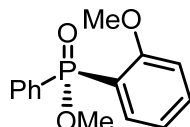

**8c**

Following **General Procedure G**, phosphinate **8c** (13.7 mg, 97% yield, 92% ee) was produced as a colorless oil from **6b** (16mg, 0.05 mmol, 93% ee). *Note: this reaction was subjected to stirring at  $-30$  °C for 48 hours instead of  $-50$  °C.* Product was purified using flash column chromatography (0 to 10% MeOH in DCM).  $^1\text{H}$  NMR (400 MHz,  $\text{CDCl}_3$ )  $\delta$  7.98 (ddd,  $J = 13.3, 7.6, 1.8$  Hz, 1H), 7.90 – 7.79 (m, 2H), 7.50 (dddd,  $J = 9.5, 6.7, 2.3, 1.1$  Hz, 2H), 7.46 – 7.36 (m, 2H), 7.07 (tdd,  $J = 7.5, 2.6, 0.9$  Hz, 1H), 6.87 (dd,  $J = 8.3, 6.0$  Hz, 1H), 3.76 (d,  $J = 11.4$  Hz, 3H), 3.71 (s, 3H);  $^{13}\text{C}$  NMR (101 MHz,  $\text{CDCl}_3$ )  $\delta$  161.01 (d,  $J = 3.9$  Hz), 134.81 (d,  $J = 6.3$  Hz), 134.46 (d,  $J = 2.0$  Hz), 132.00 (d,  $J = 142.6$  Hz), 131.86, 131.79, 131.76, 128.04 (d,  $J = 13.6$  Hz), 120.66 (d,  $J = 12.3$  Hz), 111.26 (d,  $J = 7.9$  Hz), 55.53, 51.42 (d,  $J = 6.1$  Hz);  $^{31}\text{P}$  NMR (162 MHz,  $\text{CDCl}_3$ )  $\delta$  31.72; HRMS (CI-TOF)  $m/z$  calcd for  $(\text{M}+\text{H})^+$ , found. Phosphinate **8c** was determined to be 92% ee by chiral HPLC analysis (CHIRALPAK IA, 5% iPrOH/hexanes, 1.0 mL/min, 210 nm,  $t_{\text{R}}(\text{minor}) = 37.2$  min,  $t_{\text{R}}(\text{major}) = 40.4$  min).

### Racemic Sample:



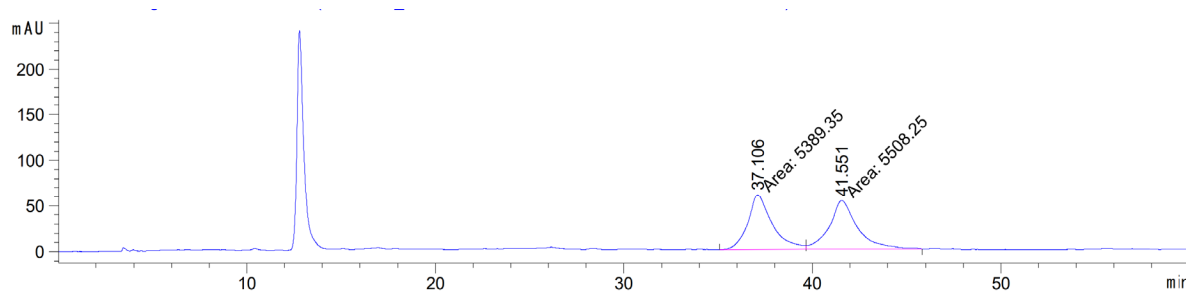

| Peak # | RetTime [min] | Type | Width [min] | Area [mAU*s] | Height [mAU] | Area %  |
|--------|---------------|------|-------------|--------------|--------------|---------|
| 1      | 37.106        | MF   | 1.5027      | 5389.35400   | 59.77253     | 49.4545 |
| 2      | 41.551        | FM   | 1.7373      | 5508.25195   | 52.84269     | 50.5455 |

### Enriched Sample:

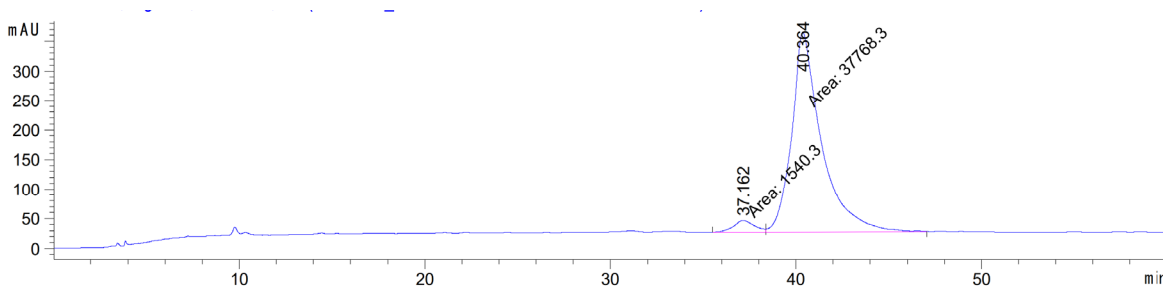

Signal 3: DAD1 C, Sig=210,4 Ref=450,100

| Peak # | RetTime [min] | Type | Width [min] | Area [mAU*s] | Height [mAU] | Area %  |
|--------|---------------|------|-------------|--------------|--------------|---------|
| 1      | 37.162        | MF   | 1.2999      | 1540.30176   | 19.74917     | 3.9185  |
| 2      | 40.364        | FM   | 1.8628      | 3.77683e4    | 337.91623    | 96.0815 |

### Methyl (*S*)-mesityl(phenyl)phosphinate (8d)

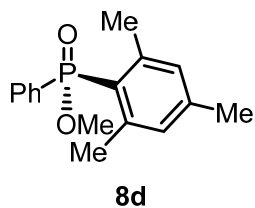

Following **General Procedure G**, phosphinate **8d** (8.4 mg, 31% yield, 89% ee) was produced as a colorless oil via reaction of phosphonate **6b** (16 mg, 0.1 mmol, 93% ee) with 2-mesityl magnesium bromide (0.1 mL, 0.1 mmol, 1 equiv., 1 M in THF). *Note: this reaction was subjected to stirring at room temperature for 36 hours instead of  $-50\text{ }^{\circ}\text{C}$ .* Product was purified using flash column chromatography (0 to 5% MeOH in DCM).  $^1\text{H NMR}$  (300 MHz;  $\text{CDCl}_3$ )  $\delta$  7.75 – 7.58 (m, 2H), 7.58 – 7.33 (m, 3H), 6.91 (d,  $J = 4.3$  Hz, 2H), 3.74 (d,  $J = 11.3$  Hz, 3H), 2.49 (d,  $J = 1.4$  Hz, 6H), 2.30 (s, 3H);  $^{13}\text{C NMR}$  (101 MHz,  $\text{CDCl}_3$ )  $\delta$  143.92 (d,  $J = 11.3$  Hz), 142.22 (d,  $J = 2.8$  Hz), 133.24 (d,  $J = 4.8$  Hz), 131.74 (d,  $J = 3.1$  Hz), 130.86 (d,  $J = 13.1$  Hz), 130.50 (d,  $J = 10.9$  Hz), 128.46 (d,  $J = 13.4$  Hz), 115.53, 50.65 (d,  $J = 5.9$  Hz), 23.37 (d,  $J = 3.3$  Hz), 21.11;  $^{31}\text{P NMR}$  (162 MHz,  $\text{CDCl}_3$ )  $\delta$  37.42; HRMS (ESI)  $m/z$  calcd for  $\text{C}_{16}\text{H}_{19}\text{O}_2\text{P}$  ( $\text{M}+\text{H}$ ) $^+$ : 275.1195; found: 275.1195. Phosphinate **8d** was determined to be 89% ee by chiral HPLC analysis (CHIRALCEL OJ-H, 4% iPrOH/hexanes, 1.0 mL/min, 230 nm,  $t_{\text{R}}(\text{minor}) = 26.0$  min,  $t_{\text{R}}(\text{major}) = 35.8$  min).

### Racemic Sample:

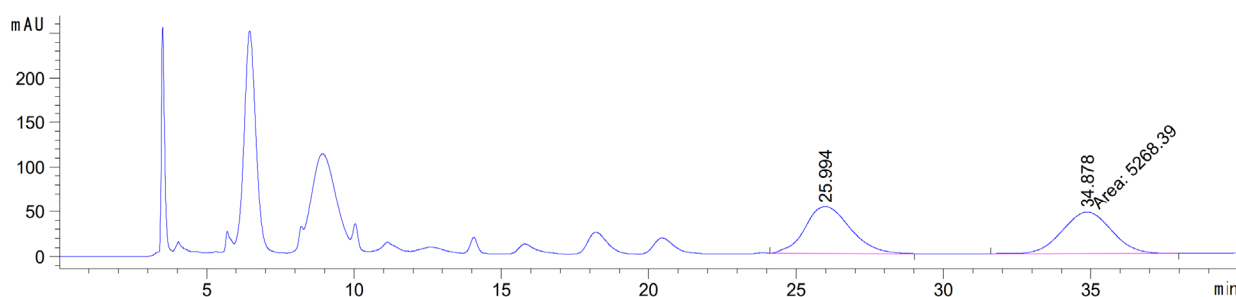

| Peak # | RetTime [min] | Type | Width [min] | Area [mAU*s] | Height [mAU] | Area %  |
|--------|---------------|------|-------------|--------------|--------------|---------|
| 1      | 25.994        | BB   | 1.2554      | 5447.34033   | 51.35950     | 50.8350 |
| 2      | 34.878        | MM   | 1.9254      | 5268.38525   | 45.60527     | 49.1650 |

**Enriched Sample:**

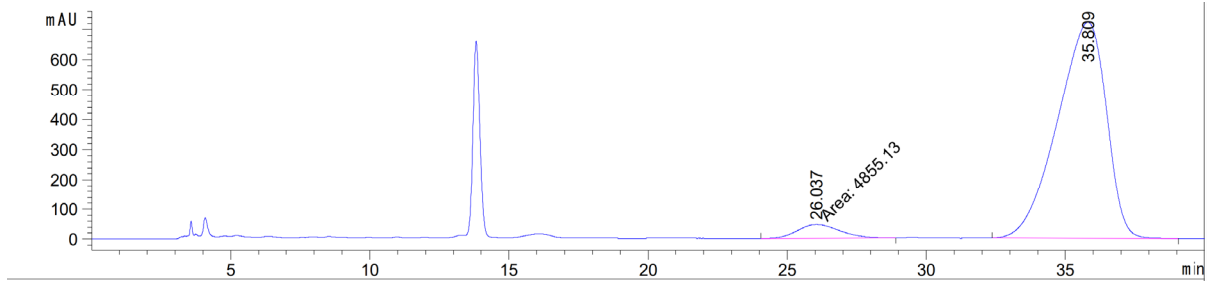

| Peak # | RetTime [min] | Type | Width [min] | Area [mAU*s] | Height [mAU] | Area %  |
|--------|---------------|------|-------------|--------------|--------------|---------|
| 1      | 26.037        | MM   | 1.7604      | 4855.13037   | 45.96743     | 5.2031  |
| 2      | 35.809        | BB   | 1.7129      | 8.84577e4    | 722.23193    | 94.7969 |

## Synthesis of (+)-SMT022332

### (2-(4-fluorophenyl)benzo[d]oxazol-5-yl)phosphonic dichloride

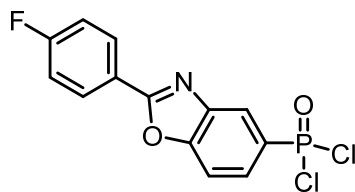

**9**

Phosphonic dichloride **9** was prepared according to **General Procedure H** and used directly without further purification in the catalytic reaction. Crude phosphonic dichloride **9** was found to be pure by  $^1\text{H}$ ,  $^{31}\text{P}$ ,  $^{19}\text{F}$ , and  $^{13}\text{C}$  NMR with no significant byproducts observed.  $^1\text{H}$  NMR (400 MHz,  $\text{C}_6\text{D}_6$ )  $\delta$  8.25 (dd,  $J = 18.5, 1.6$  Hz, 1H), 7.98 – 7.88 (m, 2H), 7.60 (ddd,  $J = 16.9, 8.4, 1.7$  Hz, 1H), 6.92 (dd,  $J = 8.4, 4.9$  Hz, 1H), 6.77 – 6.67 (m, 2H);  $^{13}\text{C}$  NMR (101 MHz,  $\text{C}_6\text{D}_6$ )  $\delta$  165.34, 162.80 (d,  $J = 3.0$  Hz), 152.80 (d,  $J = 4.3$  Hz), 141.51 (d,  $J = 26.7$  Hz), 130.08 (d,  $J = 158.3$  Hz), 129.11 (d,  $J = 9.0$  Hz), 126.09 (d,  $J = 16.3$  Hz), 121.87 (d,  $J = 16.3$  Hz), 121.37 (d,  $J = 3.2$  Hz), 115.06 (d,  $J = 22.3$  Hz), 110.07 (d,  $J = 21.7$  Hz);  $^{31}\text{P}$  NMR (162 MHz,  $\text{C}_6\text{D}_6$ )  $\delta$  33.00;  $^{19}\text{F}$  NMR (376 MHz,  $\text{C}_6\text{D}_6$ )  $\delta$  -105.73.

**4-(trifluoromethyl)phenyl (*R*)-*P*-(2-(4-fluorophenyl)benzo[d]oxazol-5-yl)-*N,N*-diisopentylphosphonamidate (10)**

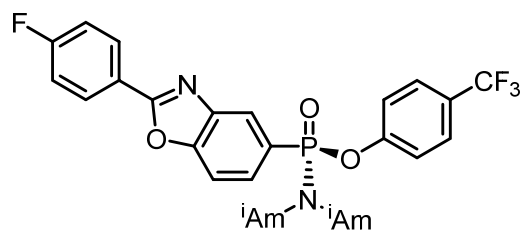

**10**

An oven-dried 40 mL vial equipped with a magnetic stir bar was charged with catalyst **1a** (14 mg, 0.03 mmol, 0.1 equiv.), 4 Å mol sieves (300 mg), and diisoamylamine (0.31 mL, 1.5 mmol, 5 equiv.). The vial was then capped with a septum, sealed with parafilm, and put under N<sub>2</sub> atmosphere. The vial was charged with diethyl ether (15 mL) and the reaction mixture was cooled to -40 °C and subjected to stirring for 20 minutes at that temperature. Phosphonic dichloride **9** (0.3 mmol) was then added to the stirring reaction mixture in one portion as a stock solution in toluene (0.5 mL), and the reaction was subjected to stirring at -40 °C for 48 hours.

A separate oven-dried 20 mL vial with a magnetic stir bar was charged with sodium hydride (180 mg, 4.5 mmol, 15 equiv., 60% in mineral oil). The vial was then capped with a septum, sealed with parafilm, and put under N<sub>2</sub> atmosphere. The vial was then charged with THF (3 mL) and allowed to stir at room temperature for 1 minute. 4-trifluoromethylphenol (243 mg, 1.5 mmol, 5 equiv.) was dissolved in THF (0.5 mL) and then added dropwise via a syringe through the septum to the stirring sodium hydride mixture over a 2-minute period. Stirring was continued at room temperature for 30 minutes. The resultant mixture was then added directly to the catalytic reaction at -40 °C after it had been stirred for 48 hours. The reaction mixture was then subjected to stirring for 24 hours at -40 °C, and then concentrated under reduced pressure. Purification via flash column

chromatography on silica gel (0 to 100% Et<sub>2</sub>O in Hexanes) afforded phosphoramidate **10** (118 mg, 68% yield, 95% ee) as a white crystalline solid. <sup>1</sup>H NMR (300 MHz, CDCl<sub>3</sub>) δ 8.36 – 8.18 (m, 3H), 7.88 (ddd, *J* = 12.7, 8.4, 1.5 Hz, 1H), 7.74 – 7.65 (m, 1H), 7.59 (d, *J* = 8.5 Hz, 2H), 7.42 (d, *J* = 8.4 Hz, 2H), 7.27 – 7.21 (m, 2H), 3.29 – 2.91 (m, 4H), 1.43 (dq, *J* = 13.1, 6.6 Hz, 2H), 1.36 – 1.16 (m, 4H), 0.81 (d, *J* = 6.6 Hz, 12H); <sup>13</sup>C NMR (101 MHz, CDCl<sub>3</sub>) δ 165.16 (d, *J* = 253.9 Hz), 163.47, 153.91 (d, *J* = 8.1 Hz), 152.96 (d, *J* = 3.6 Hz), 142.24 (d, *J* = 20.5 Hz), 130.15 (d, *J* = 9.0 Hz), 128.72 (d, *J* = 11.8 Hz), 127.12 (d, *J* = 181.0 Hz), 127.03 (q, *J* = 3.7 Hz), 126.57 (q, *J* = 32.7 Hz), 123.99 (q, *J* = 271.6 Hz), 123.78 (d, *J* = 10.9 Hz), 122.87 (d, *J* = 3.3 Hz), 120.69 (d, *J* = 5.1 Hz), 116.41 (d, *J* = 22.2 Hz), 111.17 (d, *J* = 17.1 Hz), 43.28 (d, *J* = 4.4 Hz), 37.29 (d, *J* = 2.1 Hz), 25.94, 22.48 (d, *J* = 8.4 Hz); <sup>19</sup>F NMR (376 MHz, CDCl<sub>3</sub>) δ -62.06, -106.25; <sup>31</sup>P NMR (162 MHz, CDCl<sub>3</sub>) δ 21.75; HRMS (ESI) *m/z* calcd for C<sub>30</sub>H<sub>34</sub>F<sub>4</sub>N<sub>2</sub>O<sub>3</sub>P (M+H)<sup>+</sup>: 577.2238; found: 577.2237. A crystal suitable for X-ray diffraction formed spontaneously via vapor diffusion: a saturated solution of phosphoramidate **10** in *tert*-butyl methyl ether was placed in a chamber filled ~2 cm high with hexanes, covered, and left to stand at room temperature for ~24 hours. Phosphoramidate **10** was determined to be 95% ee by chiral HPLC analysis (CHIRALPAK AD-H, 10% *i*PrOH/hexanes, 1.0 mL/min, 210 nm, *t*<sub>R</sub>(minor) = 21.4 min, *t*<sub>R</sub>(major) = 28.8 min.

### Racemic Sample:

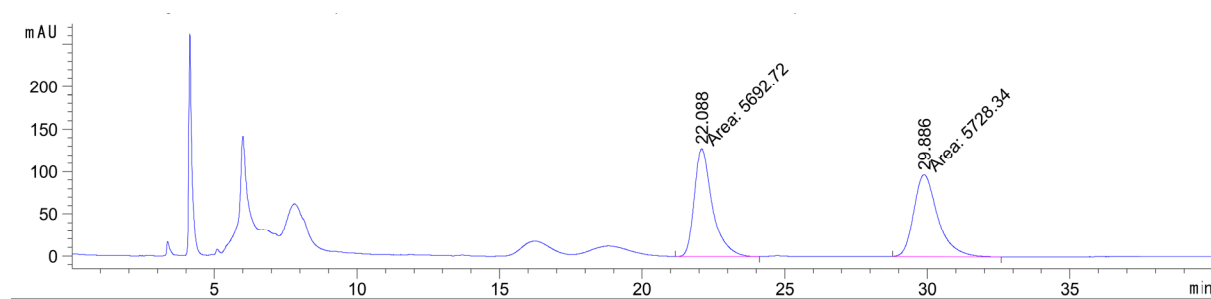

| Peak # | RetTime [min] | Type | Width [min] | Area [mAU*s] | Height [mAU] | Area %  |
|--------|---------------|------|-------------|--------------|--------------|---------|
| 1      | 22.088        | MM   | 0.7398      | 5692.72314   | 128.25186    | 49.8441 |
| 2      | 29.886        | MM   | 0.9803      | 5728.34180   | 97.38958     | 50.1559 |

### Enriched Sample:

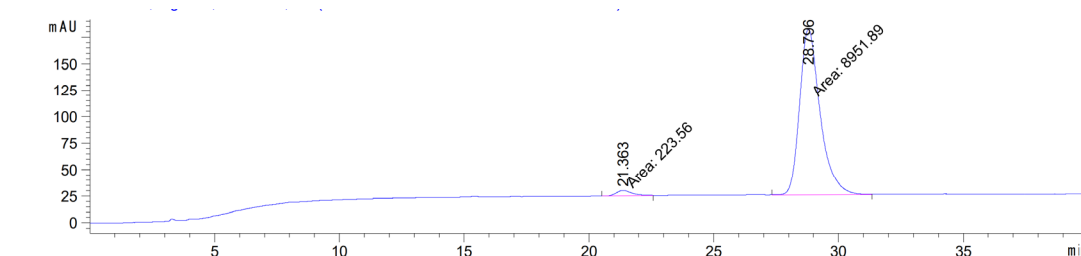

| Peak # | RetTime [min] | Type | Width [min] | Area [mAU*s] | Height [mAU] | Area %  |
|--------|---------------|------|-------------|--------------|--------------|---------|
| 1      | 21.363        | MM   | 0.7163      | 223.56013    | 5.20191      | 2.4365  |
| 2      | 28.796        | MM   | 0.9518      | 8951.89258   | 156.74986    | 97.5635 |

### Methyl (4-(trifluoromethyl)phenyl) (R)-(2-(4-fluorophenyl)benzo[d]oxazol-5-yl)phosphonate (11)

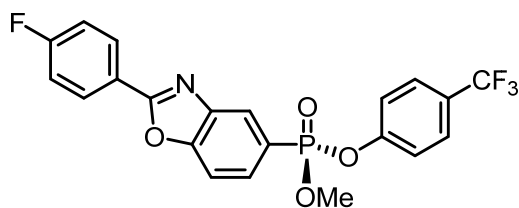

11

Following the **General Procedure E**, phosphonate **11** (55 mg, 65% yield, 94% ee) was produced as a colorless oil from phosphonamidate **10** (108 mg, 0.188 mmol, 95% ee), methanol (1 mL), and *para*-tolylsulfonic acid monohydrate (107 mg, 0.564 mmol, 3 equiv.). The product was purified

using flash column chromatography on silica gel (0 to 100% Et<sub>2</sub>O in Hexanes). <sup>1</sup>H NMR (400 MHz, CDCl<sub>3</sub>) δ 8.38 – 8.17 (m, 4H), 7.90 (ddd, *J* = 13.3, 8.3, 1.5 Hz, 1H), 7.70 (ddd, *J* = 8.4, 3.6, 0.7 Hz, 1H), 7.56 (d, *J* = 8.6 Hz, 2H), 7.35 – 7.29 (m, 2H), 7.23 (d, *J* = 8.7 Hz, 1H), 3.93 (d, *J* = 11.4 Hz, 3H); δ <sup>13</sup>C NMR (101 MHz, CDCl<sub>3</sub>) δ 166.52, 163.99, 163.73, 153.76 (d, *J* = 3.6 Hz), 153.07 (d, *J* = 6.8 Hz), 142.48 (d, *J* = 21.9 Hz), 130.26 (d, *J* = 9.0 Hz), 129.13 (d, *J* = 12.2 Hz), 127.18 (q, *J* = 3.9 Hz), 124.56 (d, *J* = 11.6 Hz), 123.82 (q, *J* = 272.1 Hz), 122.75 (d, *J* = 194.0 Hz), 122.69 (d, *J* = 3.3 Hz), 120.79 (d, *J* = 4.7 Hz), 116.45 (d, *J* = 22.2 Hz), 111.37 (d, *J* = 18.1 Hz), 53.45 (d, *J* = 5.8 Hz); <sup>19</sup>F NMR (376 MHz, CDCl<sub>3</sub>) δ -62.20, -105.98; <sup>31</sup>P NMR (162 MHz, CDCl<sub>3</sub>) δ 16.98; HRMS (ESI) *m/z* calcd for C<sub>21</sub>H<sub>15</sub>F<sub>4</sub>NO<sub>4</sub>P (M+H)<sup>+</sup>: 452.0669; found: 452.0668. Phosphonate **11** was determined to be 94% ee by chiral HPLC analysis (CHIRALPAK AD-H, 10% iPrOH/hexanes, 1.0 mL/min, 254 nm, *t*<sub>R</sub>(minor) = 33.1 min, *t*<sub>R</sub>(major) = 27.0 min.

### Racemic Sample:

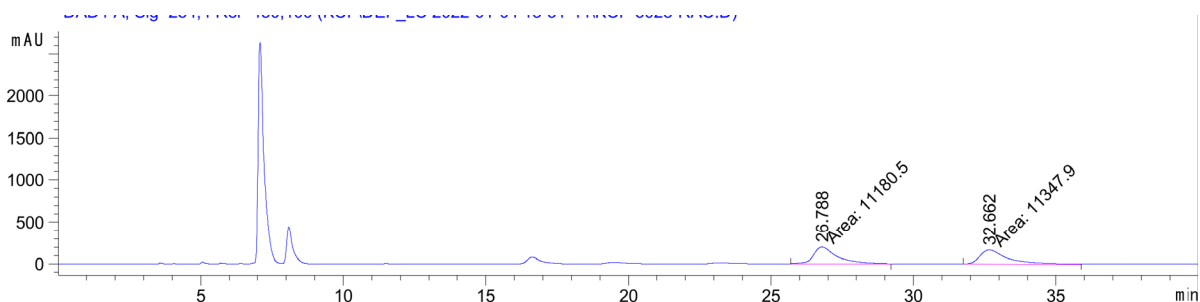

| Peak # | RetTime [min] | Type | Width [min] | Area [mAU*s] | Height [mAU] | Area %  |
|--------|---------------|------|-------------|--------------|--------------|---------|
| 1      | 26.788        | MM   | 0.9402      | 1.11805e4    | 198.20406    | 49.6286 |
| 2      | 32.662        | MM   | 1.1347      | 1.13479e4    | 166.68651    | 50.3714 |

### Enriched Sample:



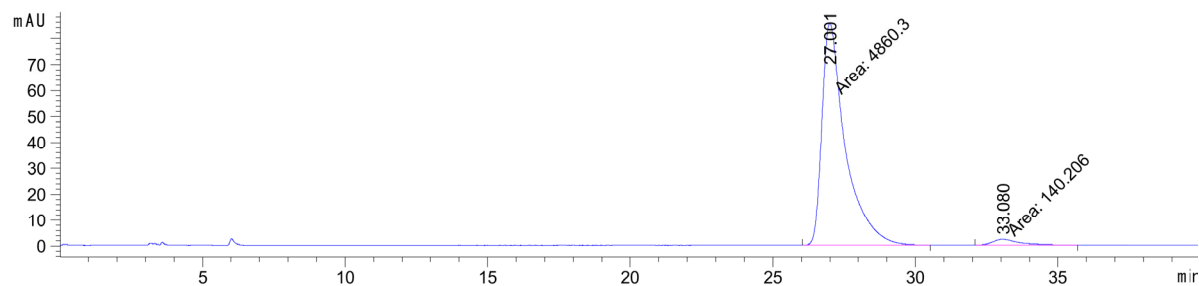

| Peak # | RetTime [min] | Type | Width [min] | Area [mAU*s] | Height [mAU] | Area %  |
|--------|---------------|------|-------------|--------------|--------------|---------|
| 1      | 27.001        | MM   | 0.9499      | 4860.29736   | 85.27512     | 97.1962 |
| 2      | 33.080        | MM   | 1.0681      | 140.20575    | 2.18772      | 2.8038  |

### Methyl (*R*)-ethyl(2-(4-fluorophenyl)benzo[d]oxazol-5-yl)phosphinate (**12**)

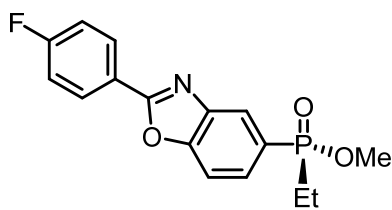

**(+)-SMT022332**

An oven-dried 2-dram vial with a magnetic stir bar was charged with phosphonate **11** (42 mg, 0.094 mmol, 1 equiv.). The vial was then capped with a septum, sealed with parafilm, and put under N<sub>2</sub> atmosphere. The vial was then charged with THF (1 mL) and allowed to stir at room temperature for 1 minute. The vial was then cooled to -50 °C for 20 minutes. EtMgCl (280 μL, 0.282 mmol, 3 equiv., 1.0 M solution in THF) was then added through the septum in one portion, and the reaction was subjected to stirring for 24 hours at -50 °C. After 24 hours had elapsed, isopropanol (50 μL) was added via a syringe at -50 °C and subjected to stirring for 1 minute at -50 °C to quench any remaining EtMgCl. Immediate purification of the mixture via flash column

chromatography on a 10-gram silica gel column (0 to 10% MeOH in DCM) afforded phosphinate **12** (30 mg, 98% yield, 94% ee) as a white solid.  $^1\text{H}$  NMR (400 MHz,  $\text{CDCl}_3$ )  $\delta$  8.41 – 8.23 (m, 2H), 8.15 (ddd,  $J = 11.7, 1.4, 0.7$  Hz, 1H), 7.83 (ddd,  $J = 10.9, 8.3, 1.4$  Hz, 1H), 7.71 (ddd,  $J = 8.3, 2.5, 0.7$  Hz, 1H), 7.32 – 7.16 (m, 1H), 7.22 (dd,  $J = 212.9, 8.5$  Hz, 1H), 3.68 (d,  $J = 11.0$  Hz, 3H), 2.11 – 1.80 (m, 2H), 1.14 (dt,  $J = 19.1, 7.7$  Hz, 3H);  $^{13}\text{C}$  NMR (101 MHz,  $\text{CDCl}_3$ )  $\delta$  153.31 (d,  $J = 2.9$  Hz), 130.18 (d,  $J = 8.9$  Hz), 129.03 (d,  $J = 11.0$  Hz), 127.01 (d,  $J = 2.7$  Hz), 125.78, 123.96, 123.85, 122.88 (d,  $J = 3.4$  Hz), 116.42 (d,  $J = 22.2$  Hz), 115.53, 111.24 (d,  $J = 14.0$  Hz), 51.26 (d,  $J = 6.9$  Hz), 22.78 (d,  $J = 103.1$  Hz), 5.93 (d,  $J = 4.8$  Hz);  $^{19}\text{F}$  NMR (376 MHz,  $\text{CDCl}_3$ )  $\delta$  -106.31;  $^{31}\text{P}$  NMR (162 MHz,  $\text{CDCl}_3$ )  $\delta$  47.84; HRMS (ESI)  $m/z$  calcd for  $\text{C}_{16}\text{H}_{16}\text{FNO}_3\text{P}$  ( $\text{M}+\text{H}$ ) $^+$ : 320.0846; found: 320.0847.  $[\alpha]^{22} = +32.2$  ( $c = 1.0$ , THF). Absolute stereochemistry was assigned by comparison to literature value (36). Phosphinate **12** was determined to be 94% ee by chiral HPLC analysis (CHIRALPAK AD-H, 5% iPrOH/hexanes, 1.0 mL/min, 220 nm,  $t_{\text{R}}$ (minor) = 52.0 min,  $t_{\text{R}}$ (major) = 45.0 min).

### Racemic Sample:

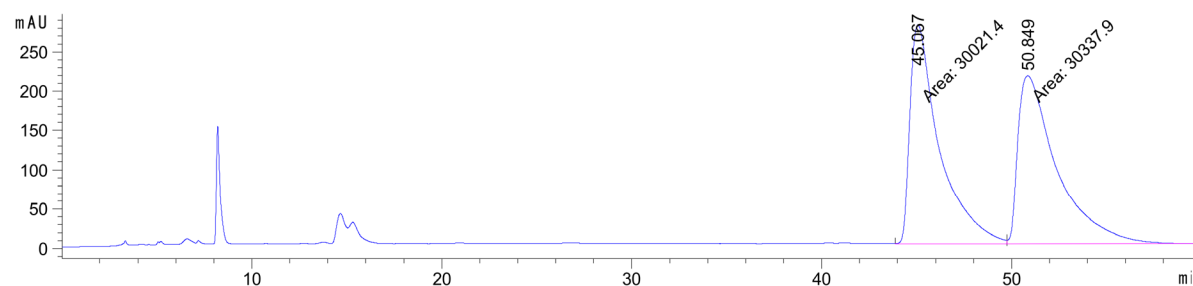

| Peak # | RetTime [min] | Type | Width [min] | Area [mAU*s] | Height [mAU] | Area %  |
|--------|---------------|------|-------------|--------------|--------------|---------|
| 1      | 45.067        | MF   | 1.7987      | 3.00214e4    | 278.17670    | 49.7378 |
| 2      | 50.849        | FM   | 2.3655      | 3.03379e4    | 213.75435    | 50.2622 |

### Enriched Sample:

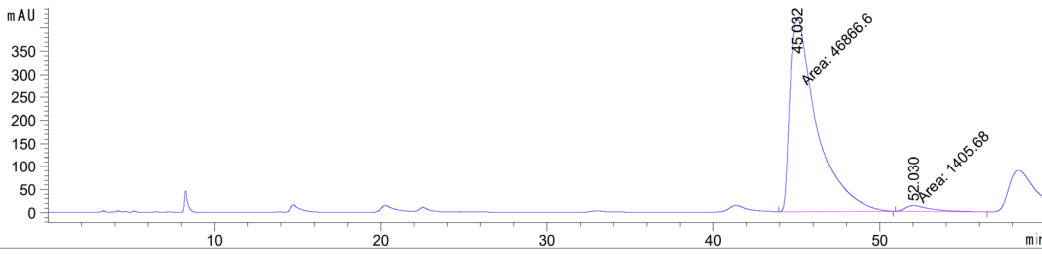

| Peak # | RetTime [min] | Type | Width [min] | Area [mAU*s] | Height [mAU] | Area %  |
|--------|---------------|------|-------------|--------------|--------------|---------|
| 1      | 45.032        | MM   | 1.8576      | 4.68666e4    | 420.50204    | 97.0880 |
| 2      | 52.030        | MM   | 1.8085      | 1405.68286   | 12.95427     | 2.9120  |

## Formal Synthesis of Matrix Metalloproteinase Inhibitor (17)

### Allyl (*R*)-*N*-allyl-*N*-benzyl-*P*-(4-methoxyphenyl)phosphonamidate (13)

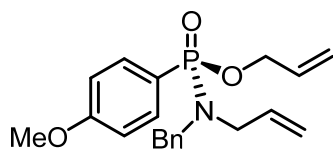

**13**

An oven-dried 40 mL vial equipped with a magnetic stir bar was charged with catalyst **1a** (20 mg, 0.04 mmol), 4 Å mol sieves (200 mg), and *N*-allyl benzylamine (103 µL, 0.66 mmol, 3.3 equiv.). The vial was then capped with a septum, sealed with parafilm, and put under N<sub>2</sub> atmosphere. The vial was charged with diethyl ether (10 mL), and the reaction mixture was cooled to –40 °C and subjected to stirring for 20 minutes at that temperature. Then, 4-methoxyphenylphosphonic dichloride (32 µL, 0.2 mmol, 1 equiv.) was then added in one portion as a stock solution in toluene (0.5 mL), and the reaction was subjected to stirring at –40 °C for 60 hours.

A separate oven-dried 20 mL vial with a magnetic stir bar was charged with sodium hydride (80 mg, 2 mmol, 10 equiv., 60% in mineral oil). The vial was then capped with a septum, sealed with parafilm, and put under N<sub>2</sub> atmosphere. The vial was then charged with THF (2 mL) and allowed to stir at room temperature for 1 minute. Allyl alcohol (136 µL, 2 mmol, 10 equiv.) was then added dropwise via a syringe through the septum to the stirring sodium hydride mixture over a 2-minute period, and stirring was continued at room temperature for 30 minutes. The resultant allyl alkoxide mixture was then added directly to the catalytic reaction at –40 °C after it had been stirred for 60 hours. The reaction mixture was then subjected to stirring for 24 hours at –40 °C, and then concentrated under reduced pressure. Purification via flash column chromatography on silica gel (0 to 40% Et<sub>2</sub>O in DCM) afforded phosphonamidate **13** (63 mg, 88% yield, 89% ee) as a colorless

oil.  $^1\text{H}$  NMR (400 MHz,  $\text{CDCl}_3$ )  $\delta$  7.77 – 7.68 (m, 2H), 7.36 – 7.21 (m, 5H), 7.04 – 6.79 (m, 2H), 5.97 (ddt,  $J = 17.1, 10.6, 5.3$  Hz, 1H), 5.70 – 5.48 (m, 1H), 5.35 (dq,  $J = 17.1, 1.6$  Hz, 1H), 5.22 (dq,  $J = 10.4, 1.4$  Hz, 1H), 5.12 (dd,  $J = 10.1, 1.6$  Hz, 1H), 5.04 (dq,  $J = 17.1, 1.5$  Hz, 1H), 4.62 – 4.43 (m, 2H), 4.31 – 4.16 (m, 2H), 3.85 (s, 3H), 3.57 – 3.39 (m, 2H);  $^{13}\text{C}$  NMR (101 MHz,  $\text{CDCl}_3$ )  $\delta$  162.35 (d,  $J = 3.1$  Hz), 137.92 (d,  $J = 3.4$  Hz), 134.21 (d,  $J = 1.7$  Hz), 133.58 (d,  $J = 11.0$  Hz), 133.38 (d,  $J = 7.6$  Hz), 128.54 (d,  $J = 34.0$  Hz), 127.25, 122.01 (d,  $J = 182.4$  Hz), 118.37, 117.31, 114.07, 113.92, 64.96 (d,  $J = 5.4$  Hz), 55.31, 47.90 (d,  $J = 4.9$  Hz), 47.10 (d,  $J = 5.0$  Hz);  $^{31}\text{P}$  NMR (162 MHz,  $\text{CDCl}_3$ )  $\delta$  24.48; HRMS (ESI)  $m/z$  calcd for  $\text{C}_{20}\text{H}_{25}\text{NO}_3\text{P}$  ( $\text{M}+\text{H}$ ) $^+$ : 358.1567; found: 358.1566. Phosphoramidate **13** was determined to be 89% ee by chiral HPLC analysis (CHIRALPAK AS-H, 5% iPrOH/hexanes, 1.0 mL/min, 220 nm,  $t_{\text{R}}(\text{minor}) = 61.6$  min,  $t_{\text{R}}(\text{major}) = 49.8$  min.

### Racemic Sample:

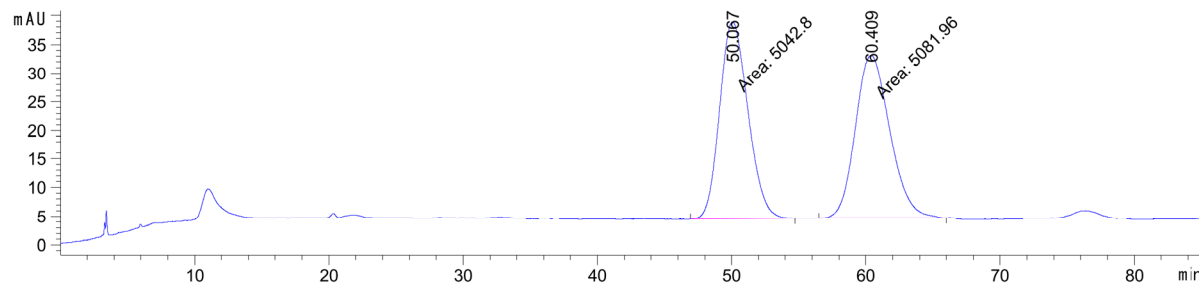

| Peak # | RetTime [min] | Type | Width [min] | Area [mAU*s] | Height [mAU] | Area %  |
|--------|---------------|------|-------------|--------------|--------------|---------|
| 1      | 50.067        | MM   | 2.4425      | 5042.80322   | 34.41081     | 49.8066 |
| 2      | 60.409        | MM   | 2.9711      | 5081.96289   | 28.50823     | 50.1934 |

### Enriched Sample:

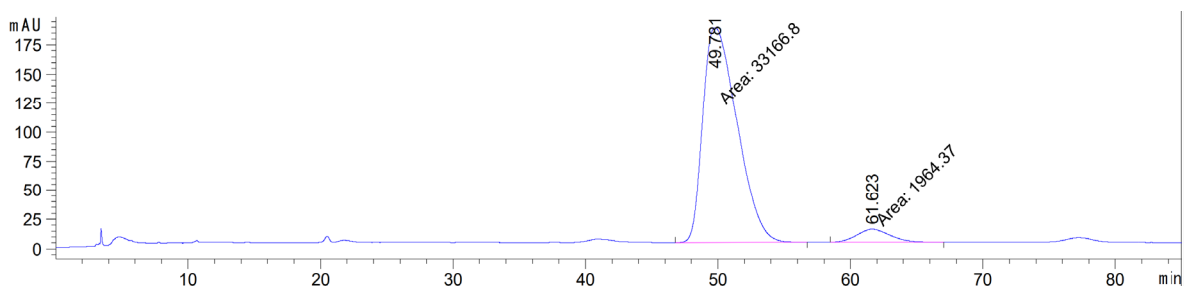

| Peak # | RetTime [min] | Type | Width [min] | Area [mAU*s] | Height [mAU] | Area %  |
|--------|---------------|------|-------------|--------------|--------------|---------|
| 1      | 49.781        | MM   | 2.9965      | 3.31668e4    | 184.47664    | 94.4085 |
| 2      | 61.623        | MM   | 2.9433      | 1964.36536   | 11.12346     | 5.5915  |

**(R)-3-benzyl-2-(4-methoxyphenyl)-3,4,7-trihydro-1,3,2-oxazaphosphepine 2-oxide (14)**

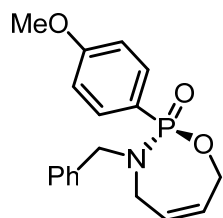

**14**

An oven-dried 100 mL flask with a magnetic stir bar was charged with Hoveyda-Grubbs 2<sup>nd</sup> Generation M720 (18 mg, 0.028 mmol 0.04 equiv.). The flask was then sealed with a septum cap, sealed with parafilm, and put under N<sub>2</sub> atmosphere. The flask was then charged with DCM (30 mL). Phosphoramidate **13** (250 mg, 0.7 mmol, 1 equiv.) dissolved in DCM (5 mL) was then added to the flask via syringe through the septum. The resulting solution was then degassed with N<sub>2</sub> for 30 minutes. The reaction was then subjected to stirring at 40 °C for 24 hours, at which point Hoveyda-Grubbs 2<sup>nd</sup> Generation M720 (15 mg, 0.025 mmol, 0.035 equiv.) dissolved in DCM (1 mL) was added via a syringe through the septum. The reaction was then subjected to stirring at 40

°C for an additional 24 hours. Upon completion, the crude mixture was dry loaded onto silica gel (~5 grams) and purified via flash column chromatography on silica gel (0 to 40% Et<sub>2</sub>O in DCM) to afford the product. Phosphoramidate **14** was obtained as a colorless oil (217 mg, 0.66 mmol, 94% yield). <sup>1</sup>H NMR (400 MHz, CDCl<sub>3</sub>) δ 7.95 – 7.56 (m, 2H), 7.49 – 7.10 (m, 5H), 6.97 (dd, *J* = 8.8, 3.2 Hz, 2H), 5.65 (ddt, *J* = 13.4, 5.3, 2.4 Hz, 2H), 5.23 (dddd, *J* = 13.1, 8.5, 4.3, 2.1 Hz, 1H), 4.65 (dd, *J* = 15.0, 7.9 Hz, 1H), 4.54 – 4.32 (m, 1H), 4.23 (dd, *J* = 15.1, 5.8 Hz, 1H), 3.85 (s, 3H), 3.68 (dd, *J* = 16.8, 5.0 Hz, 1H), 3.24 – 2.96 (m, 1H); <sup>13</sup>C NMR (101 MHz, CDCl<sub>3</sub>) δ 162.42 (d, *J* = 3.3 Hz), 138.72 (d, *J* = 4.6 Hz), 133.18 (d, *J* = 10.7 Hz), 128.80, 128.46, 128.23, 127.01 (d, *J* = 50.6 Hz), 120.98 (d, *J* = 187.7 Hz), 114.07, 113.92, 62.35 (d, *J* = 6.5 Hz), 55.33, 50.69 (d, *J* = 4.4 Hz), 43.41 (d, *J* = 4.3 Hz) ; <sup>31</sup>P NMR (162 MHz, CDCl<sub>3</sub>) δ 28.34; HRMS (ESI) *m/z* calcd for C<sub>18</sub>H<sub>21</sub>NO<sub>3</sub>P (M+H)<sup>+</sup>: 330.1254; found: 330.1254.

**(*R*)-2-(4-methoxyphenyl)-1,3,2-oxazaphosphepane 2-oxide (15)**

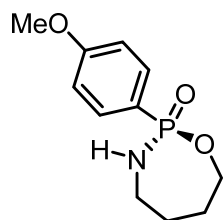

**15**

*\*Note: successful hydrogenolysis is dependent on efficient sparging with H<sub>2</sub> at 30 °C and subjection to vigorous stirring.*

To a 1-dram vial equipped with a magnetic stir bar, phosphoramidate **14** (18.0 mg, 0.0547 mmol, 1 equiv.), Pd(OH)<sub>2</sub>/C (6 mg, 0.0082 mmol, 0.15 equiv., 20%), and Pd/C (9 mg, 0.0082 mmol, 0.15 equiv., 10%) were added. The vial was then capped with a septum and sealed with parafilm.

The vial was evacuated and backfilled three times with N<sub>2</sub>, then evacuated and backfilled once with H<sub>2</sub>. Isopropanol (0.55 mL) and trifluoroacetic acid (12 μL, 0.164 mmol, 3 equiv.) were introduced sequentially via a syringe through the septum. The mixture was then sparged with H<sub>2</sub> for 10 minutes while subjected to vigorous stirring at 30 °C. The reaction was then subjected to stirring under an H<sub>2</sub> balloon for 20 hours at 30 °C, after which point an additional portion of trifluoroacetic acid (12 μL, 0.164 mmol, 3 equiv.) was added and the reaction was sparged with H<sub>2</sub> again for 5 minutes. The reaction was subjected to stirring under an H<sub>2</sub> balloon for an additional 8 hours at 30 °C, after which point it was sparged with H<sub>2</sub> for an additional 5 minutes. Reaction completion was confirmed after 41 hours by TLC analysis by visualization with KMnO<sub>4</sub>. The crude mixture was then loaded directly onto a silica gel column and purified using flash column chromatography (0 to 10% MeOH in DCM) to afford the product. Phosphoramidate **15** (9.1 mg, 0.0377 mmol, 69% yield) was afforded as a white solid.

<sup>1</sup>H NMR (400 MHz, CDCl<sub>3</sub>) δ 7.84 – 7.63 (m, 2H), 6.94 (dq, *J* = 9.3, 2.7 Hz, 2H), 4.54 (qd, *J* = 11.6, 1.2 Hz, 1H), 4.16 (ddtd, *J* = 19.9, 11.8, 3.7, 3.3, 1.4 Hz, 1H), 3.84 (s, 3H), 3.36 – 2.95 (m, 1H), 2.81 (q, *J* = 9.3, 7.9 Hz, 1H), 2.02 – 1.71 (m, 4H), 1.70 – 1.45 (m, 1H); <sup>13</sup>C NMR (101 MHz, CDCl<sub>3</sub>) δ 162.25 (d, *J* = 3.3 Hz), 132.82 (d, *J* = 10.9 Hz), 122.69 (d, *J* = 190.0 Hz), 113.87 (d, *J* = 15.6 Hz), 65.28 (d, *J* = 6.7 Hz), 55.31, 41.23, 32.01, 29.97; <sup>31</sup>P NMR (162 MHz, CDCl<sub>3</sub>) δ 27.00; HRMS (ESI) *m/z* calcd for C<sub>11</sub>H<sub>17</sub>NO<sub>3</sub>P (M+H)<sup>+</sup>: 242.0941; found: 242.0940.



**Ethyl (*R*)-2-(2-(4-methoxyphenyl)-2-oxido-1,3,2-oxazaphosphhepan-3-yl)acetate (**16**)**

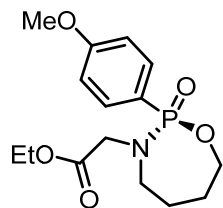

**16**

An oven-dried 2-dram vial with a magnetic stir bar was charged with phosphonamidate **15** (40 mg, 0.165 mmol, 1 equiv.). The vial was then capped with a septum and sealed with parafilm. The vial was then put under N<sub>2</sub> atmosphere, charged with THF (1.2 mL), and subjected to stirring at 0 °C for 10 minutes. NaHMDS (180 μL, 0.18 mmol, 1.1 equiv, 1.0 M in THF) was then added dropwise via a syringe through the septum to the stirring solution over a 5-minute period. The resulting yellow solution was subjected to stirring for 1 hour at 0 °C. Ethyl bromoacetate (44 μL, 0.36 mmol, 2.2 equiv.) dissolved in THF (0.2 mL) was then slowly added dropwise via a syringe through the septum to the stirring solution over a 1-minute period. The mixture was then subjected to stirring at 0 °C for 4 hours. The crude mixture was then purified by flash column chromatograph using silica gel (0 to 10% MeOH in DCM) to afford the product. Phosphonamidate **16** (47 mg, 87% yield, 90% ee) was afforded as a colorless oil.

<sup>1</sup>H NMR (400 MHz, CDCl<sub>3</sub>) δ 7.85 (dd, *J* = 12.7, 8.7 Hz, 2H), 7.14 – 6.78 (m, 2H), 4.62 – 4.44 (m, 1H), 4.35 (ddd, *J* = 18.1, 9.6, 1.3 Hz, 1H), 4.15 (q, *J* = 7.2 Hz, 3H), 3.83 (s, 3H), 3.94 – 3.67 (m, 1H), 3.16 (dq, *J* = 16.1, 6.1 Hz, 1H), 2.99 – 2.83 (m, 1H), 1.88 – 1.71 (m, 3H), 1.23 (t, *J* = 7.2 Hz, 3H). <sup>1</sup>H NMR (400 MHz, CDCl<sub>3</sub>) δ 7.90 – 7.82 (m, 2H), 7.02 – 6.78 (m, 2H), 4.62 – 4.43 (m, 1H), 4.35 (ddd, *J* = 18.1, 9.6, 1.3 Hz, 1H), 4.15 (q, *J* = 7.2 Hz, 3H), 3.83 (s, 3H), 3.80 (d, *J* = 9.1 Hz, 1H), 3.16 (ddd, *J* = 16.3, 11.0, 6.0 Hz, 1H), 3.03 – 2.77 (m, 1H), 1.95 – 1.71 (m, 4H), 1.23 (t, *J* = 7.2 Hz, 3H); <sup>13</sup>C NMR (101 MHz, CDCl<sub>3</sub>) δ 171.45 (d, *J* = 2.9 Hz), 162.23 (d, *J* = 3.4 Hz),

133.21 (d,  $J = 11.3$  Hz), 122.07 (d,  $J = 191.0$  Hz), 113.77 (d,  $J = 15.9$  Hz), 65.16 (d,  $J = 6.7$  Hz), 60.96, 55.27, 48.51 (d,  $J = 6.0$  Hz), 47.33 (d,  $J = 5.2$  Hz), 29.51, 26.51, 14.19 ;  $^{31}\text{P}$  NMR (162 MHz,  $\text{CDCl}_3$ )  $\delta$  26.57; HRMS (ESI)  $m/z$  calcd for  $\text{C}_{15}\text{H}_{23}\text{NO}_5\text{P}$  ( $\text{M}+\text{H}$ ) $^+$ : 328.1308; found: 328.1309. Phosphoramidate **16** was determined to be 90% ee by chiral HPLC analysis (CHIRALPAK AD-H, 15% *i*PrOH/hexanes, 1.0 mL/min, 210 nm,  $t_{\text{R}}$ (minor) = 23.3 min,  $t_{\text{R}}$ (major) = 16.1 min.

### Racemic Sample:

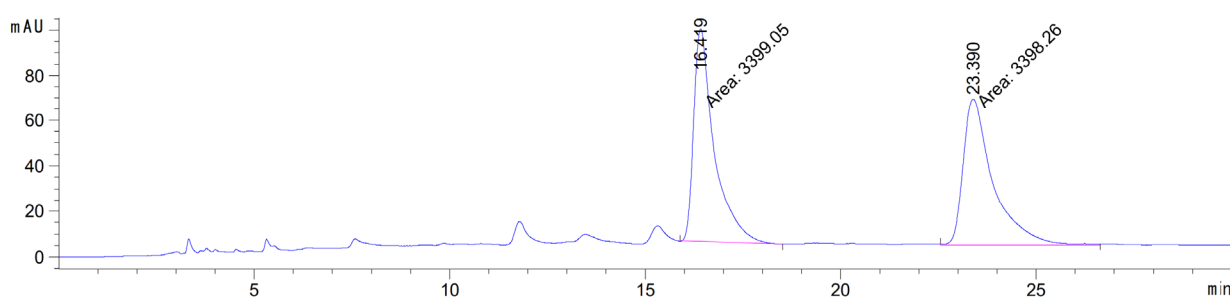

| Peak # | RetTime [min] | Type | Width [min] | Area [mAU*s] | Height [mAU] | Area %  |
|--------|---------------|------|-------------|--------------|--------------|---------|
| 1      | 16.419        | MM   | 0.6045      | 3399.04736   | 93.71301     | 50.0058 |
| 2      | 23.390        | MM   | 0.8815      | 3398.26294   | 64.25117     | 49.9942 |

### Enriched Sample:

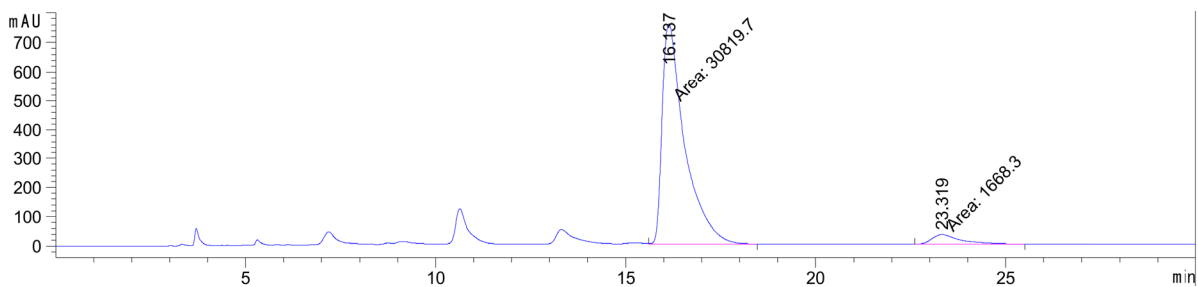

| Peak # | RetTime [min] | Type | Width [min] | Area [mAU*s] | Height [mAU] | Area %  |
|--------|---------------|------|-------------|--------------|--------------|---------|
| 1      | 16.137        | MM   | 0.6800      | 3.08197e4    | 755.38434    | 94.8649 |
| 2      | 23.319        | MM   | 0.8591      | 1668.30176   | 32.36551     | 5.1351  |

## Deallylation of methyl *N*-allyl-*N*-benzyl-*P*-phenylphosphonamidate

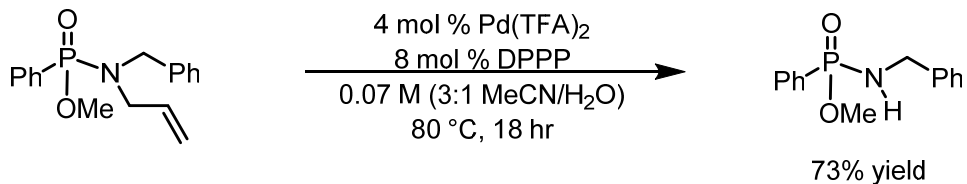

### Procedure:

Conditions were adapted from a reported procedure for deallylation of amides (50). Pd(TFA)<sub>2</sub> (2 mg, 0.006 mmol, 0.04 equiv.), 1,3-Bis(diphenylphosphino)propane (DPPP) (5 mg, 0.012 mmol, 0.08 equiv.), and methyl *N*-allyl-*N*-benzyl-*P*-phenylphosphonamidate (45.2 mg, 0.15 mmol, 1 equiv.) were added to a 2-dram vial equipped with a magnetic stir bar. The vial was then capped with a septum and sealed with electrical tape. The vial was then evacuated and backfilled three times with N<sub>2</sub>. MeCN (1.6 mL) and H<sub>2</sub>O (0.5 mL) of water were then added to the vial via syringe. The resulting solution was subjected to stirring at room temperature for ~1 minute, and then subjected to stirring at 80 °C for 18 hours. After 18 hours, the crude mixture was cooled to room temperature, concentrated under reduced pressure until ~1 mL of solvent remained, and then purified via flash column chromatography on silica gel (0 to 10% MeOH in DCM). Methyl *N*-benzyl-*P*-phenylphosphonamidate was afforded as a colorless oil (28.7 mg, 73% yield).

### Synthesis of Methyl *N*-allyl-*N*-benzyl-*P*-phenylphosphonamidate

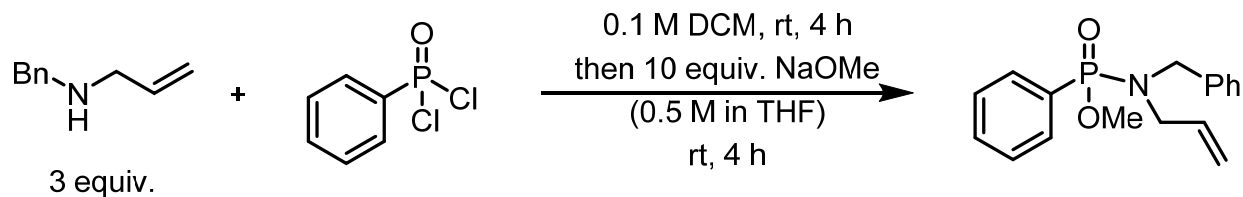

An oven-dried 20 mL vial equipped with a magnetic stir bar was charged with *N*-allyl benzylamine (94  $\mu$ L, 0.6 mmol, 3 equiv.). The vial was then capped with a septum, sealed with parafilm, and put under N<sub>2</sub> atmosphere. The vial was charged with DCM (2 mL), followed by phenyl phosphonic dichloride (28  $\mu$ L, 0.2 mmol, 1 equiv.) dissolved in toluene (0.5 mL), and the reaction was subjected to stirring at room temperature for 4 hours. The reaction was quenched with sodium methoxide prepared according to the following procedure:

A separate oven-dried 2-dram vial with a magnetic stir bar was charged with sodium hydride (80 mg, 2 mmol, 10 equiv., 60% in mineral oil). The vial was then capped with a septum, sealed with parafilm, and put under N<sub>2</sub> atmosphere. The vial was then charged with THF (1.5 mL) and allowed to stir at room temperature for 1 minute. Methanol (0.5 mL) was then added dropwise via syringe through the septum to the stirring sodium hydride mixture over a 2-minute period, and stirring was continued at room temperature until clear. If the mixture remained cloudy after 10 minutes, additional methanol (0.1 mL) was introduced to ensure complete dissolution of sodium methoxide. The resultant sodium methoxide solution was then added directly in a single portion to the reaction stirring in DCM at room temperature. Upon addition of sodium methoxide, the reaction was subjected to stirring for 4 hours at room temperature, after which point it was concentrated under reduced pressure and purified by flash column chromatography on silica gel (0 to 50% Et<sub>2</sub>O in DCM). <sup>1</sup>H NMR (400 MHz, CDCl<sub>3</sub>)  $\delta$  7.78 (ddd,  $J$  = 12.8, 8.3, 1.5 Hz, 2H), 7.61 – 7.47 (m, 1H), 7.44 (ddd,  $J$  = 8.6, 6.5, 3.9 Hz, 2H), 7.34 – 7.13 (m, 5H), 5.60 (ddt,  $J$  = 16.7, 10.1, 6.5 Hz, 1H), 5.12 (dd,  $J$  = 10.1, 1.5 Hz, 1H), 5.04 (dq,  $J$  = 17.1, 1.5 Hz, 1H), 4.24 (d,  $J$  = 9.0 Hz, 2H), 3.75 (d,  $J$  = 11.1 Hz, 3H), 3.49 (dtdd,  $J$  = 9.1, 7.7, 3.4, 2.1 Hz, 2H). <sup>13</sup>C NMR (101 MHz, CDCl<sub>3</sub>)  $\delta$  137.75 (d,  $J$  = 3.3 Hz), 134.02 (d,  $J$  = 1.7 Hz), 131.74 (d,  $J$  = 3.0 Hz), 131.56 (d,  $J$  = 9.5 Hz), 130.70 (d,  $J$  = 175.7 Hz), 128.56 (d,  $J$  = 32.0 Hz), 128.50 (d,  $J$  = 36.0 Hz), 128.49 (d,  $J$  = 14.2 Hz), 127.31,

118.49, 51.37 (d,  $J = 5.9$  Hz), 47.89 (d,  $J = 4.8$  Hz), 47.02 (d,  $J = 4.9$  Hz).  $^{31}\text{P}$  NMR (162 MHz,  $\text{CDCl}_3$ )  $\delta$  24.59. HRMS (ESI)  $m/z$  calcd for  $\text{C}_{17}\text{H}_{21}\text{NO}_2\text{P}$  ( $\text{M}+\text{H}$ ) $^+$ : 302.1304 ; found: 302.1306.

## Reaction Optimization

### Concentration

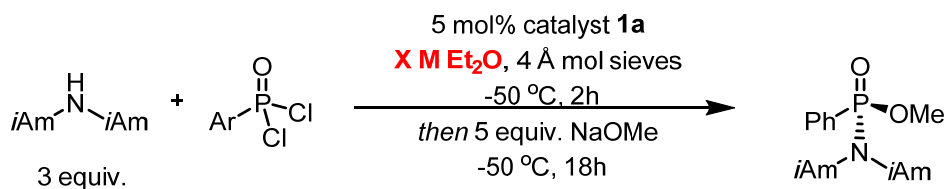

| concentration | % ee | % yield |
|---------------|------|---------|
| 0.02 M        | 95   | 93      |
| 0.05 M        | 94   | 100     |
| 0.1 M         | 91   | 98      |
| 0.2 M         | 90   | 94      |

**Table S1.** Effect of reaction concentration on enantioselectivity. Reactions were carried out on a 0.06 mmol scale. Yield values reflect product quantification by <sup>31</sup>P NMR relative to an internal standard.

## Catalyst Loading

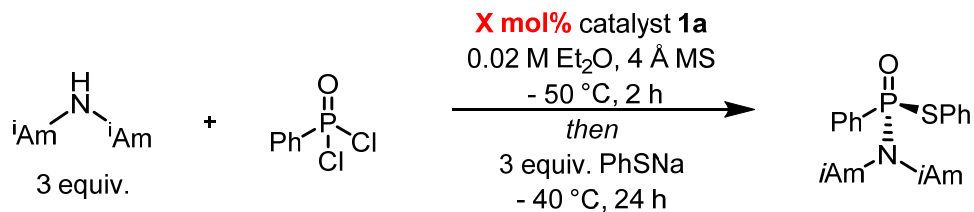

| <b>X</b> | <b>% ee</b> | <b>% conversion</b> | <b>% yield</b> |
|----------|-------------|---------------------|----------------|
| 2        | 94          | 89                  | 84             |
| 5        | 94          | 100                 | 100            |
| 10       | 94          | 100                 | 100            |

**Table S2.** Effect of catalyst loading on enantioselectivity. Reactions were carried out on a 0.06 mmol scale. Yield values reflect product quantification by <sup>31</sup>P NMR relative to an internal standard.

## Solvent Effects

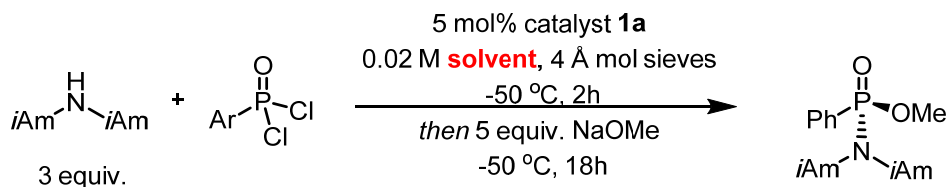

| <b>Solvent</b>    | <b>% ee</b> | <b>% yield</b> |
|-------------------|-------------|----------------|
| Et <sub>2</sub> O | 95          | 93             |
| TBME              | 93          | 96             |
| THF               | 68          | 89             |
| DCM               | 5           | 98             |
| Toluene           | 91          | 100            |

**Table S3.** Effect of solvent on enantioselectivity. Reactions were carried out on a 0.06 mmol scale. Yield values reflect product quantification by <sup>31</sup>P NMR relative to an internal standard.



## Effect of Molecular Sieves

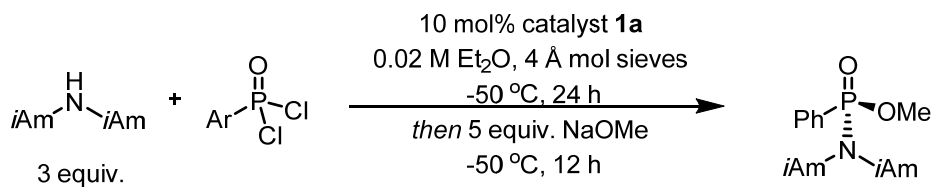

| Deviation from Conditions | % ee | % yield |
|---------------------------|------|---------|
| --                        | 95   | 100     |
| No mol sieves             | 89   | 94      |

**Table S4.** Effect of molecular sieves on enantioselectivity. Reactions were carried out on a 0.06 mmol scale. Yield values reflect product quantification by  $^{31}\text{P}$  NMR relative to an internal standard.

## Comparison of General Procedure A and General Procedure B for various nucleophiles

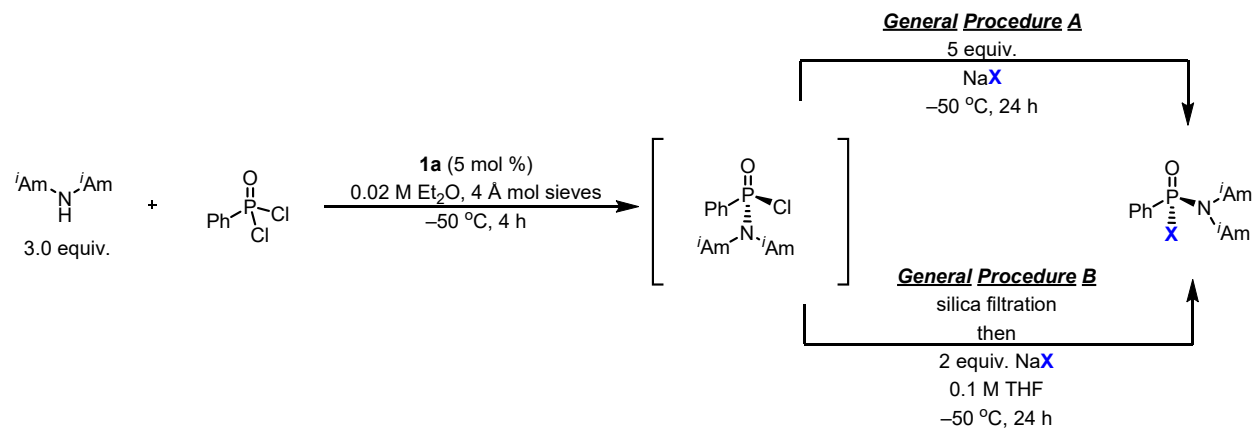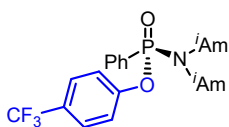

**A**: 93% ee, 63% yield  
**B**: 93% ee, 59% yield

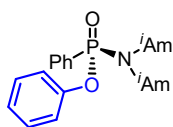

**A**: 93% ee, 100% yield  
**B**: 93% ee, 86% yield

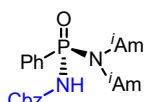

**A**: product not observed  
**B**: 92% ee, 75% yield

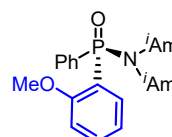

**A**: 70% ee, 36% yield\*  
**B**: 91% ee, 97% yield\*\*

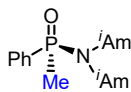

**A**: 93% ee, 59% yield\*  
**B**: 94% ee, 94% yield\*\*

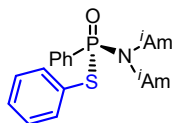

**A**: 94% ee, 90% yield  
**B**: 93% ee, 62% yield

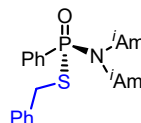

**A**: 94% ee, 91% yield  
**B**: 92% ee, 72% yield

Reactions were carried out on 0.2 mmol scale. Yield values reflect isolated yields. \*Reaction was carried out on 0.06 mmol scale. \*\*5 equivalents of Grignard reagent used.

## Comparison of conditions for synthesis of compound 4f

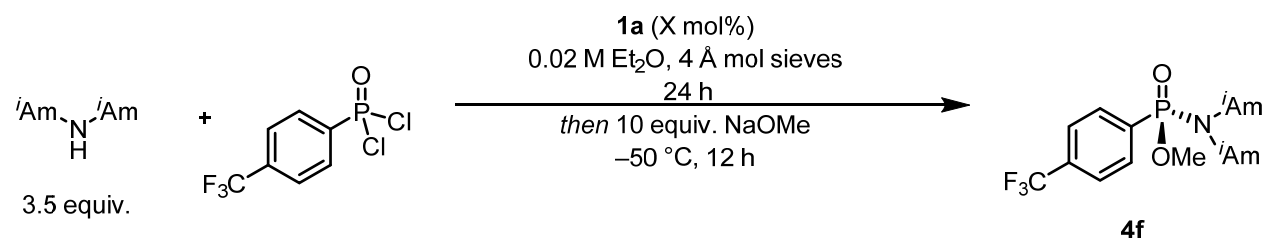

| Catalyst Loading (mol%) | Temperature ( $^\circ\text{C}$ ) | % yield | % ee |
|-------------------------|----------------------------------|---------|------|
| 5                       | -78                              | 96      | 88   |
| 20                      | -78                              | 89      | 92   |

**Table S5.** Yield values reflect isolated yields. Reactions were performed on 0.2 mmol scale.

## Comparison of conditions for synthesis of compound 4g

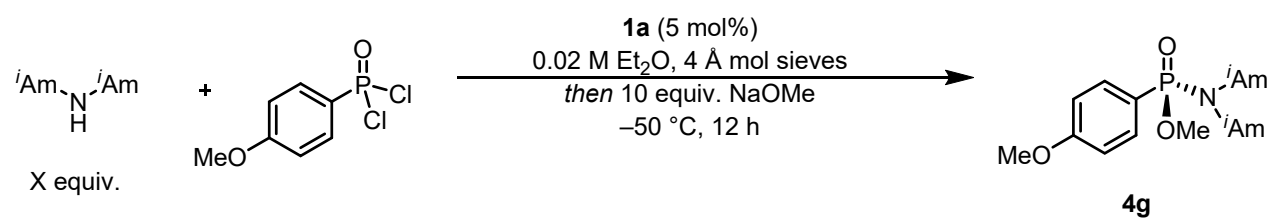

| Conditions                                                                                | % yield | % ee |
|-------------------------------------------------------------------------------------------|---------|------|
| <b>Standard</b> (3.5 equiv. $i\text{Am}_2\text{NH}$ , $-50\text{ }^\circ\text{C}$ , 24 h) | 54      | 90   |
| <b>Optimal</b> (4.5 equiv. $i\text{Am}_2\text{NH}$ , $-40\text{ }^\circ\text{C}$ , 48 h)  | 92      | 90   |

**Table S6.** Yield values reflect isolated yields. Reactions were performed on 0.2 mmol scale.

## Effect of ammonium chloride additives on catalytic and racemic reaction

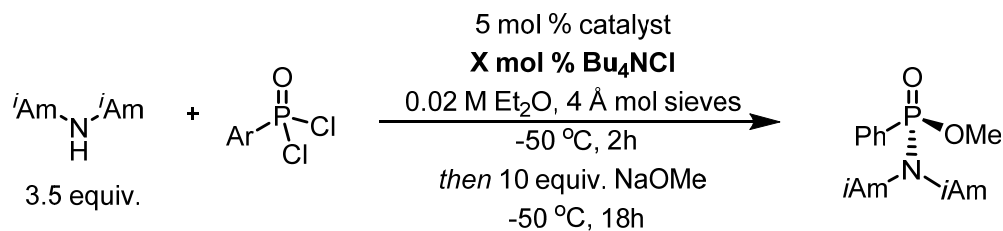

| mol % Bu <sub>4</sub> NCl | % ee | % yield | % conversion |
|---------------------------|------|---------|--------------|
| 0                         | 95   | 93      | 100          |
| 5                         | 92   | 92      | 92           |
| 10                        | 83   | 78      | 84           |
| 20                        | 20   | 73      | 79           |
| 40                        | 9    | 82      | 89           |
| 80                        | 5    | 87      | 90           |

**Table S7.** Enantioselectivity of catalytic reaction decreases with increasing amounts of Bu<sub>4</sub>NCl.

Yield values reflect product quantification by <sup>31</sup>P NMR relative to an internal standard.

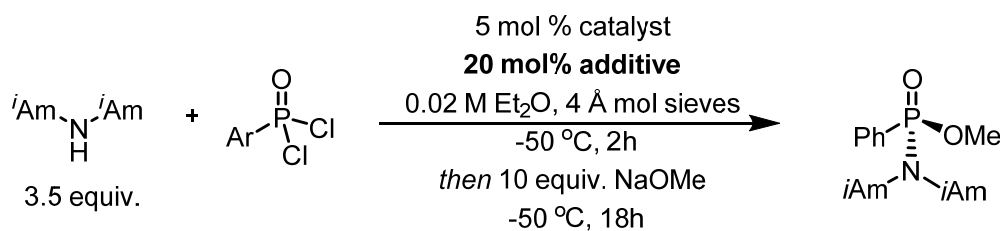

| Additive (20 mol%)                          | % ee | % yield | % conversion |
|---------------------------------------------|------|---------|--------------|
| --                                          | 95   | 93      | 100          |
| <i>i</i> Am <sub>2</sub> NH <sub>2</sub> Cl | 93   | 93      | 100          |
| Bn <sub>2</sub> NH <sub>2</sub> Cl          | 92   | 97      | 100          |

**Table S8.** Effect of dialkylammonium chloride additives on enantioselectivity of catalytic reaction. Yield values reflect product quantification by <sup>31</sup>P NMR relative to an internal standard.

$$\begin{array}{ccc}
 \begin{array}{c} i\text{Am}-\text{N}-i\text{Am} \\ | \\ \text{H} \\ 3.5 \text{ equiv.} \end{array} + \begin{array}{c} \text{O} \\ || \\ \text{Ar}-\text{P}-\text{Cl} \\ | \\ \text{Cl} \end{array} & \xrightarrow[\begin{array}{c} \text{then } 10 \text{ equiv. NaOMe} \\ -50 \text{ }^\circ\text{C}, 18\text{h} \end{array}]{\begin{array}{c} \text{20 mol\% additive} \\ 0.02 \text{ M Et}_2\text{O}, 4 \text{ \AA mol sieves} \\ -50 \text{ }^\circ\text{C}, 2\text{h} \end{array}} & \begin{array}{c} \text{O} \\ || \\ \text{Ph}-\text{P}-\text{OMe} \\ | \\ \text{N} \\ | \quad | \\ i\text{Am} \quad i\text{Am} \end{array}
 \end{array}$$

| Additive                           | % yield | % conversion |
|------------------------------------|---------|--------------|
| None                               | 21      | 38           |
| <i>i</i> AmNH <sub>2</sub> Cl      | 23      | 44           |
| Bn <sub>2</sub> NH <sub>2</sub> Cl | 32      | 65           |
| Bu <sub>4</sub> NCl                | 83      | 83           |
| Bu <sub>4</sub> NBzO               | 96      | 100          |
| Bu <sub>4</sub> NPF <sub>6</sub>   | 18      | 48           |
| Bu <sub>4</sub> NBF <sub>4</sub>   | 22      | 54           |

**Table S9.** Effect of ammonium chloride additives on racemic background reaction in the absence of catalyst. Yield values reflect product quantification by <sup>31</sup>P NMR relative to an internal standard.

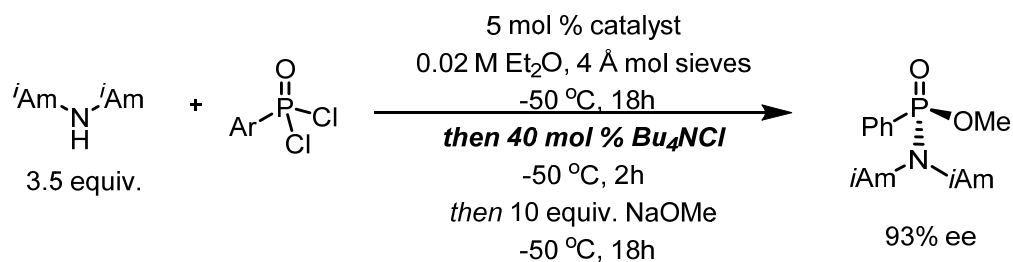

**Scheme S1.** Enantioenriched chlorophosphonamidate **3** formed under reaction conditions does not undergo racemization in the presence of Bu<sub>4</sub>NCl.

## Racemization studies of chlorophosphonamidate **3**

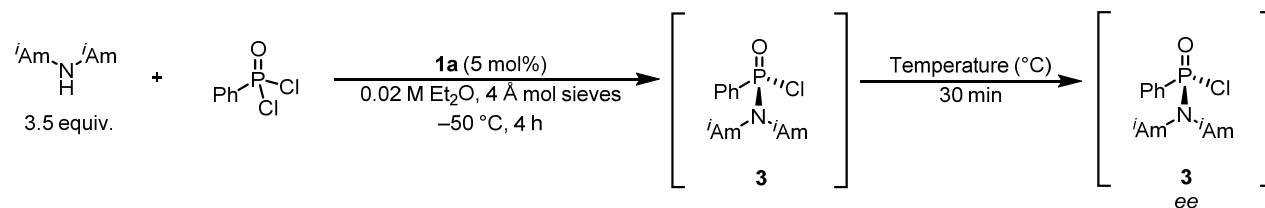

| Temperature (°C) | % ee |
|------------------|------|
| 0                | 94   |
| 25               | 93   |
| 35               | 92   |
| 25 (16 h)        | 82   |

**Table S10.**

An oven-dried 2-dram vial equipped with a magnetic stir bar was charged with catalyst **1a** (1.4 mg, 0.003 mmol, 0.05 equiv.), 4 Å mol sieves (60 mg), and diisooamylamine (44 μL, 0.21 mmol, 3.5 equiv.). The vial was then capped with a septum, sealed with parafilm, and put under N<sub>2</sub> atmosphere. The vial was charged with diethyl ether (3 mL), and the reaction mixture was cooled to -50 °C and subjected to stirring at that temperature for 20 minutes. A solution of phenyl phosphonic dichloride (8.4 μL, 0.06 mmol, 1 equiv.) in toluene (0.2 mL) was then added in one portion, and the reaction mixture was subjected to stirring at -50 °C for 4 hours. The mixture was filtered at room temperature through ~3 grams of silica to remove remaining amine, ammonium chloride byproduct, and catalyst. The filtered solution of **3** was then transferred to a 20 mL vial and concentrated under reduced pressure while kept at a temperature of 0 °C or below to remove the Et<sub>2</sub>O until ~0.5 mL toluene remained. After this procedure, chlorophosphonamidate **3** was determined to be 94% ee by chiral HPLC analysis (CHIRALPAK AD-H, 3% iPrOH/hexanes, 1.0 mL/min, 220 nm, t<sub>R</sub>(minor) = 14.7 min, t<sub>R</sub>(major) = 18.8 min). Subsequently, the same solution of

**3** was heated to 25 °C for 30 min, after which point chlorophosphonamidate **3** was determined to be 93% ee by chiral HPLC analysis. Subsequently, the same solution of **3** was heated to 35 °C for 30 min, after which point chlorophosphonamidate **3** was determined to be 92% ee by chiral HPLC analysis. Then, upon letting the same solution of **3** stand at 25 °C for 16 hours, chlorophosphonamidate **3** was determined to be 82% ee by chiral HPLC analysis.

<sup>1</sup>H NMR (400 MHz, CDCl<sub>3</sub>) δ 7.98 (ddt, *J* = 14.9, 6.4, 1.8 Hz, 1H), 7.17 – 6.94 (m, 3H), 3.29 – 2.97 (m, 4H), 1.58 – 1.31 (m, 6H), 0.82 (dd, *J* = 9.7, 6.3 Hz, 12H); <sup>31</sup>P NMR (162 MHz, CDCl<sub>3</sub>) δ 38.00.

### Racemic Sample

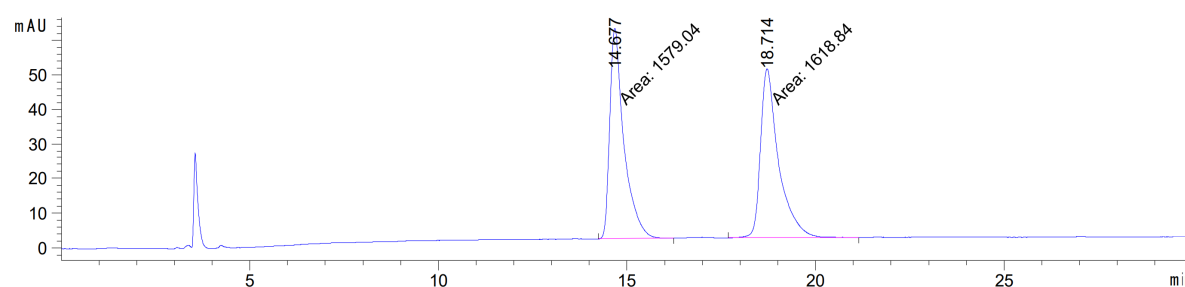

| Peak # | RetTime [min] | Type | Width [min] | Area [mAU*s] | Height [mAU] | Area %  |
|--------|---------------|------|-------------|--------------|--------------|---------|
| 1      | 14.677        | MM   | 0.4328      | 1579.03784   | 60.81334     | 49.3776 |
| 2      | 18.714        | MM   | 0.5528      | 1618.84204   | 48.80572     | 50.6224 |

### Enriched Sample (94% ee)

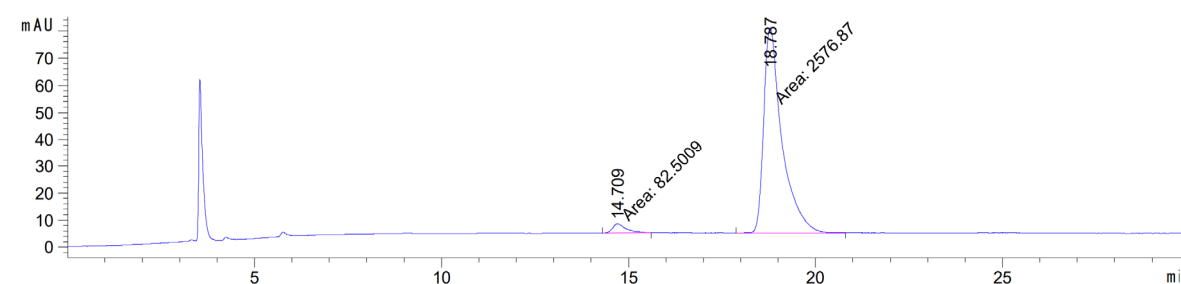

| Peak # | RetTime [min] | Type | Width [min] | Area [mAU*s] | Height [mAU] | Area %  |
|--------|---------------|------|-------------|--------------|--------------|---------|
| 1      | 14.709        | MM   | 0.4145      | 82.50092     | 3.31699      | 3.1023  |
| 2      | 18.787        | MM   | 0.5651      | 2576.87476   | 75.99724     | 96.8977 |

## NMR spectra of chlorophosphonamidate 3 in C<sub>6</sub>D<sub>6</sub>

<sup>1</sup>H

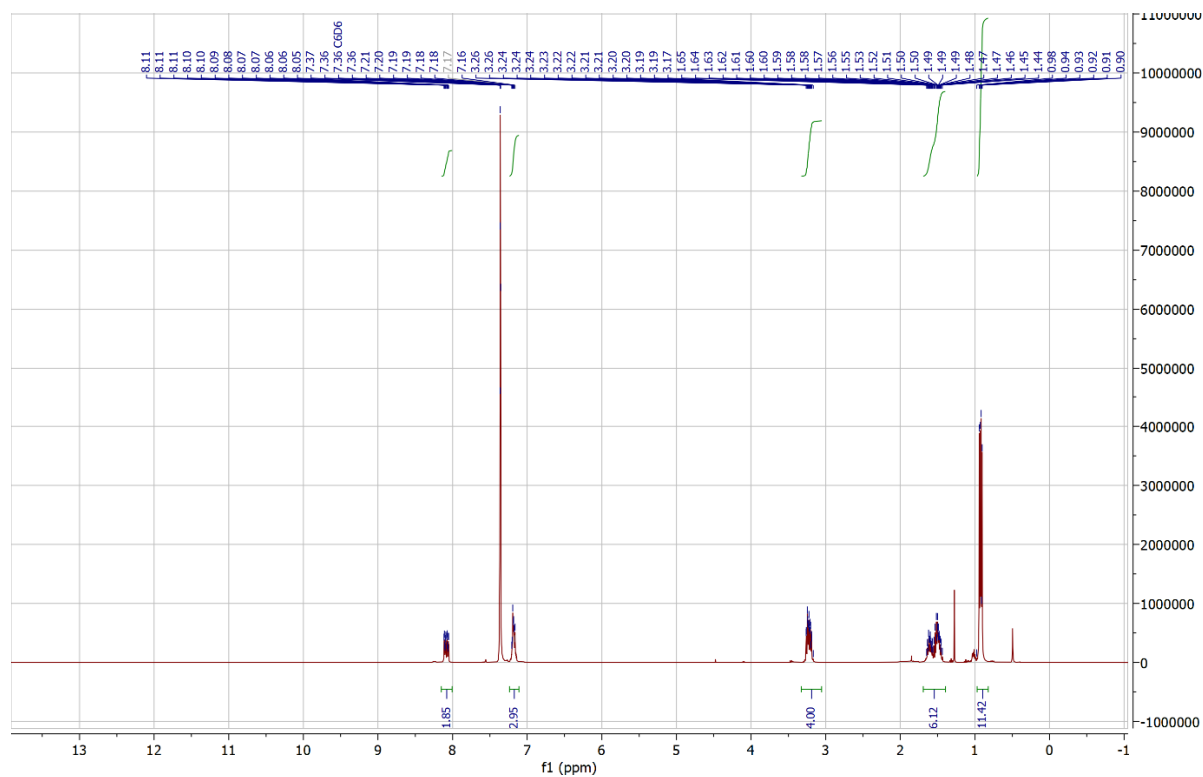



$^{31}\text{P}$

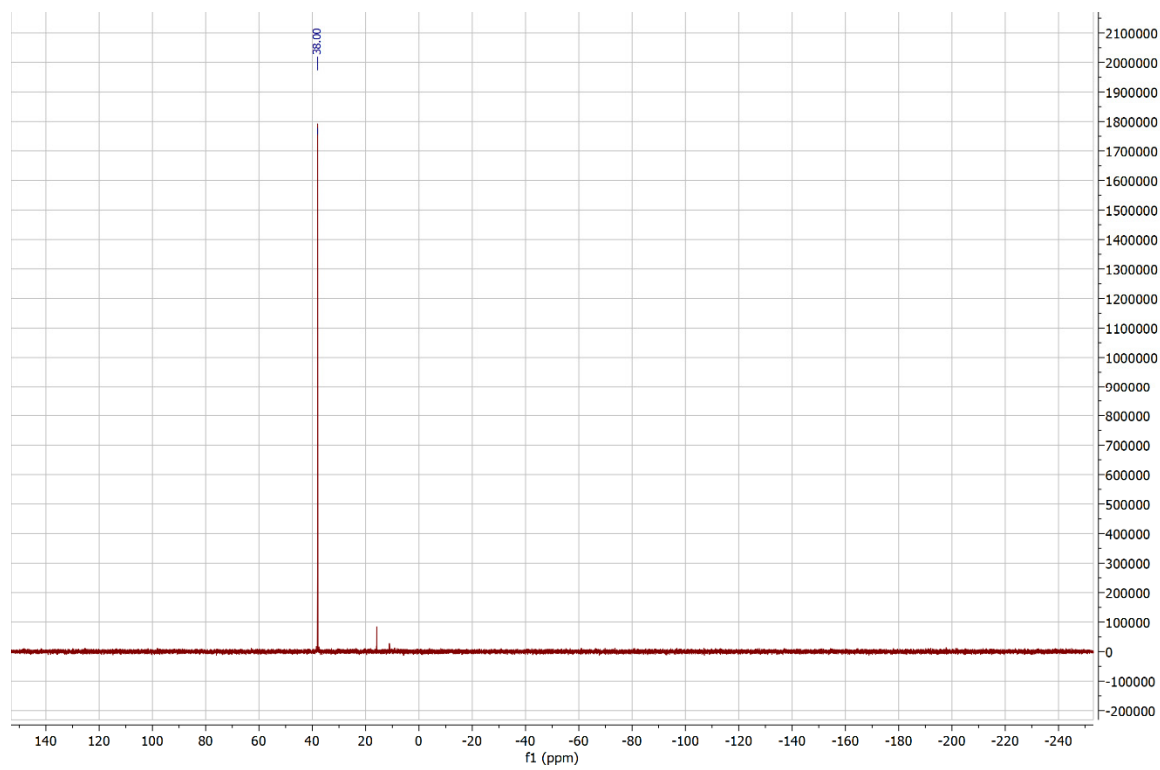

S113

## X-ray crystallography

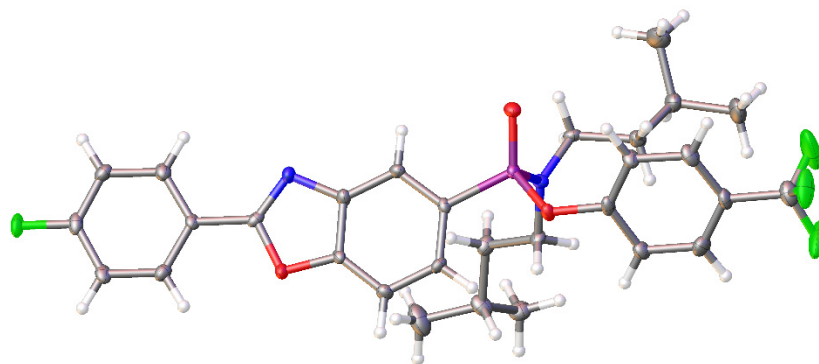

10

**X-ray Crystallography:** A crystal mounted on a diffractometer was collected data at 100 K. The intensities of the reflections were collected by means of a Bruker APEX II CCD diffractometer ( $\text{MoK}\alpha$  radiation,  $\lambda=0.71073$  Å), and equipped with an Oxford Cryosystems nitrogen flow apparatus. The collection method involved  $0.5^\circ$  scans in  $\omega$  at  $28^\circ$  in  $2\theta$ . Data integration down to  $0.77$  Å resolution was carried out using SAINT V8.37A (51) with reflection spot size optimization. Absorption corrections were made with the program SADABS (51,52). The structure was solved by the Intrinsic Phasing methods and refined by least-squares methods again  $F^2$  using SHELXT-2014 (53) and SHELXL-2014 (54) with OLEX 2 interface (55). Non-hydrogen atoms were refined anisotropically, and hydrogen atoms were allowed to ride on the respective atoms. Crystal data as well as details of data collection and refinement are summarized in Table S10, and geometric parameters are shown in Table S11. The Ortep plots were produced with SHELXL-2014 program, and the three-dimensional supramolecular architecture drawing was produced with Accelrys DS Visualizer 2.06 (56).

**Table S10. Experimental details**

|                             |                                                                                |
|-----------------------------|--------------------------------------------------------------------------------|
| Crystal data                |                                                                                |
| Chemical formula            | C <sub>30</sub> H <sub>33</sub> F <sub>4</sub> N <sub>2</sub> O <sub>3</sub> P |
| $M_r$                       | 576.55                                                                         |
| Crystal system, space group | Monoclinic, $P2_1$                                                             |
| Temperature (K)             | 100                                                                            |
| $a, b, c$ (Å)               | 14.0169 (7), 5.9557 (3), 18.0856 (10)                                          |
| $\beta$ (°)                 | 103.9371 (17)                                                                  |
| $V$ (Å <sup>3</sup> )       | 1465.35 (13)                                                                   |
| $Z$                         | 2                                                                              |
| Radiation type              | Mo $K\alpha$                                                                   |
| $\mu$ (mm <sup>-1</sup> )   | 0.15                                                                           |
| Crystal size (mm)           | 0.14 × 0.08 × 0.06                                                             |
|                             |                                                                                |
| Data collection             |                                                                                |
| Diffractometer              | Bruker D8 goniometer with CCD area detector                                    |
| Absorption correction       | Multi-scan<br><i>SADABS</i>                                                    |
| $T_{\min}, T_{\max}$        | 0.728, 0.801                                                                   |

|                                                                                    |                                                                                                                                    |
|------------------------------------------------------------------------------------|------------------------------------------------------------------------------------------------------------------------------------|
| No. of measured,<br>independent and observed [ $I$<br>$> 2\sigma(I)$ ] reflections | 15725, 6211, 5220                                                                                                                  |
| $R_{\text{int}}$                                                                   | 0.039                                                                                                                              |
| $(\sin \theta/\lambda)_{\text{max}}$ ( $\text{\AA}^{-1}$ )                         | 0.650                                                                                                                              |
| Refinement                                                                         |                                                                                                                                    |
| $R[F^2 > 2\sigma(F^2)]$ , $wR(F^2)$ , $S$                                          | 0.059, 0.117, 1.13                                                                                                                 |
| No. of reflections                                                                 | 6211                                                                                                                               |
| No. of parameters                                                                  | 376                                                                                                                                |
| No. of restraints                                                                  | 40                                                                                                                                 |
| H-atom treatment                                                                   | H-atom parameters constrained                                                                                                      |
| $\Delta\rho_{\text{max}}$ , $\Delta\rho_{\text{min}}$ ( $\text{e \AA}^{-3}$ )      | 0.43, -0.39                                                                                                                        |
| Absolute structure                                                                 | Flack x determined using 1819 quotients $[(I^+)-(I^-)]/[(I^+)+(I^-)]$ (Parsons, Flack and Wagner, Acta Cryst. B69 (2013) 249-259). |
| Absolute structure parameter                                                       | 0.05 (8)                                                                                                                           |

Computer programs: *SAINT* 8.37A (Bruker-AXS, 2015), *SHELXT2014* (Sheldrick, 2015), *SHELXL2014* (Sheldrick, 2015), Bruker *SHELXTL* (Sheldrick, 2015).

**Table S11. Geometric parameters (Å, °)**

|        |           |          |           |
|--------|-----------|----------|-----------|
| P1—O2  | 1.471 (3) | C17—C20  | 1.494 (6) |
| P1—O3  | 1.614 (3) | C18—C19  | 1.390 (6) |
| P1—N2  | 1.628 (4) | C18—H18  | 0.9500    |
| P1—C4  | 1.790 (4) | C19—H19  | 0.9500    |
| F1—C11 | 1.358 (4) | C21—C22  | 1.528 (5) |
| O1—C1  | 1.370 (4) | C21—H21A | 0.9900    |
| O1—C7  | 1.379 (5) | C21—H21B | 0.9900    |
| O3—C14 | 1.399 (5) | C22—C23  | 1.527 (6) |
| N1—C7  | 1.286 (5) | C22—H22A | 0.9900    |
| N1—C6  | 1.400 (5) | C22—H22B | 0.9900    |
| N2—C26 | 1.472 (5) | C23—C24  | 1.522 (6) |
| N2—C21 | 1.475 (5) | C23—C25  | 1.523 (6) |
| C1—C2  | 1.373 (6) | C23—H23  | 1.0000    |
| C1—C6  | 1.391 (6) | C24—H24A | 0.9800    |
| C2—C3  | 1.397 (5) | C24—H24B | 0.9800    |
| C2—H2  | 0.9500    | C24—H24C | 0.9800    |
| C3—C4  | 1.403 (6) | C25—H25A | 0.9800    |
| C3—H3  | 0.9500    | C25—H25B | 0.9800    |

|         |           |          |           |
|---------|-----------|----------|-----------|
| C4—C5   | 1.386 (6) | C25—H25C | 0.9800    |
| C5—C6   | 1.386 (5) | C26—C27  | 1.529 (5) |
| C5—H5   | 0.9500    | C26—H26A | 0.9900    |
| C7—C8   | 1.468 (5) | C26—H26B | 0.9900    |
| C8—C9   | 1.393 (6) | C27—C28  | 1.521 (6) |
| C8—C13  | 1.393 (6) | C27—H27A | 0.9900    |
| C9—C10  | 1.393 (6) | C27—H27B | 0.9900    |
| C9—H9   | 0.9500    | C28—C29  | 1.521 (6) |
| C10—C11 | 1.375 (6) | C28—C30  | 1.533 (7) |
| C10—H10 | 0.9500    | C28—H28  | 1.0000    |
| C11—C12 | 1.372 (6) | C29—H29A | 0.9800    |
| C12—C13 | 1.383 (5) | C29—H29B | 0.9800    |
| C12—H12 | 0.9500    | C29—H29C | 0.9800    |
| C13—H13 | 0.9500    | C30—H30A | 0.9800    |
| C14—C19 | 1.377 (6) | C30—H30B | 0.9800    |
| C14—C15 | 1.383 (6) | C30—H30C | 0.9800    |
| C15—C16 | 1.386 (5) | C20—F4   | 1.303 (5) |
| C15—H15 | 0.9500    | C20—F2   | 1.310 (6) |

|            |             |               |            |
|------------|-------------|---------------|------------|
| C16—C17    | 1.389 (6)   | C20—F3        | 1.337 (6)  |
| C16—H16    | 0.9500      | C20A—F4A      | 1.258 (15) |
| C17—C18    | 1.378 (6)   | C20A—F2A      | 1.298 (16) |
| C17—C20A   | 1.494 (6)   | C20A—F3A      | 1.36 (2)   |
|            |             |               |            |
| O2—P1—O3   | 114.21 (17) | N2—C21—H21A   | 109.0      |
| O2—P1—N2   | 112.07 (18) | C22—C21—H21A  | 109.0      |
| O3—P1—N2   | 108.00 (17) | N2—C21—H21B   | 109.0      |
| O2—P1—C4   | 114.10 (18) | C22—C21—H21B  | 109.0      |
| O3—P1—C4   | 99.22 (17)  | H21A—C21—H21B | 107.8      |
| N2—P1—C4   | 108.35 (18) | C23—C22—C21   | 113.1 (3)  |
| C1—O1—C7   | 103.3 (3)   | C23—C22—H22A  | 109.0      |
| C14—O3—P1  | 120.0 (2)   | C21—C22—H22A  | 109.0      |
| C7—N1—C6   | 104.0 (3)   | C23—C22—H22B  | 109.0      |
| C26—N2—C21 | 116.6 (3)   | C21—C22—H22B  | 109.0      |
| C26—N2—P1  | 122.5 (3)   | H22A—C22—H22B | 107.8      |
| C21—N2—P1  | 120.7 (3)   | C24—C23—C25   | 110.5 (4)  |
| O1—C1—C2   | 128.0 (4)   | C24—C23—C22   | 111.5 (4)  |

|          |           |               |           |
|----------|-----------|---------------|-----------|
| O1—C1—C6 | 108.0 (3) | C25—C23—C22   | 110.9 (4) |
| C2—C1—C6 | 124.0 (3) | C24—C23—H23   | 107.9     |
| C1—C2—C3 | 116.1 (4) | C25—C23—H23   | 107.9     |
| C1—C2—H2 | 122.0     | C22—C23—H23   | 107.9     |
| C3—C2—H2 | 122.0     | C23—C24—H24A  | 109.5     |
| C2—C3—C4 | 120.8 (4) | C23—C24—H24B  | 109.5     |
| C2—C3—H3 | 119.6     | H24A—C24—H24B | 109.5     |
| C4—C3—H3 | 119.6     | C23—C24—H24C  | 109.5     |
| C5—C4—C3 | 121.8 (3) | H24A—C24—H24C | 109.5     |
| C5—C4—P1 | 116.1 (3) | H24B—C24—H24C | 109.5     |
| C3—C4—P1 | 121.9 (3) | C23—C25—H25A  | 109.5     |
| C4—C5—C6 | 117.5 (4) | C23—C25—H25B  | 109.5     |
| C4—C5—H5 | 121.3     | H25A—C25—H25B | 109.5     |
| C6—C5—H5 | 121.3     | C23—C25—H25C  | 109.5     |
| C5—C6—C1 | 119.9 (4) | H25A—C25—H25C | 109.5     |
| C5—C6—N1 | 131.5 (4) | H25B—C25—H25C | 109.5     |
| C1—C6—N1 | 108.6 (3) | N2—C26—C27    | 112.9 (3) |
| N1—C7—O1 | 116.1 (3) | N2—C26—H26A   | 109.0     |



|             |           |               |           |
|-------------|-----------|---------------|-----------|
| N1—C7—C8    | 128.2 (4) | C27—C26—H26A  | 109.0     |
| O1—C7—C8    | 115.6 (3) | N2—C26—H26B   | 109.0     |
| C9—C8—C13   | 120.5 (4) | C27—C26—H26B  | 109.0     |
| C9—C8—C7    | 119.1 (4) | H26A—C26—H26B | 107.8     |
| C13—C8—C7   | 120.3 (4) | C28—C27—C26   | 114.9 (4) |
| C8—C9—C10   | 119.7 (4) | C28—C27—H27A  | 108.5     |
| C8—C9—H9    | 120.2     | C26—C27—H27A  | 108.5     |
| C10—C9—H9   | 120.2     | C28—C27—H27B  | 108.5     |
| C11—C10—C9  | 117.8 (4) | C26—C27—H27B  | 108.5     |
| C11—C10—H10 | 121.1     | H27A—C27—H27B | 107.5     |
| C9—C10—H10  | 121.1     | C29—C28—C27   | 110.4 (4) |
| F1—C11—C12  | 118.0 (4) | C29—C28—C30   | 110.4 (4) |
| F1—C11—C10  | 118.0 (4) | C27—C28—C30   | 112.1 (4) |
| C12—C11—C10 | 124.0 (4) | C29—C28—H28   | 107.9     |
| C11—C12—C13 | 118.0 (4) | C27—C28—H28   | 107.9     |
| C11—C12—H12 | 121.0     | C30—C28—H28   | 107.9     |
| C13—C12—H12 | 121.0     | C28—C29—H29A  | 109.5     |
| C12—C13—C8  | 120.0 (4) | C28—C29—H29B  | 109.5     |

|              |           |               |            |
|--------------|-----------|---------------|------------|
| C12—C13—H13  | 120.0     | H29A—C29—H29B | 109.5      |
| C8—C13—H13   | 120.0     | C28—C29—H29C  | 109.5      |
| C19—C14—C15  | 122.0 (4) | H29A—C29—H29C | 109.5      |
| C19—C14—O3   | 117.9 (4) | H29B—C29—H29C | 109.5      |
| C15—C14—O3   | 120.0 (4) | C28—C30—H30A  | 109.5      |
| C14—C15—C16  | 118.5 (4) | C28—C30—H30B  | 109.5      |
| C14—C15—H15  | 120.7     | H30A—C30—H30B | 109.5      |
| C16—C15—H15  | 120.7     | C28—C30—H30C  | 109.5      |
| C15—C16—C17  | 120.2 (4) | H30A—C30—H30C | 109.5      |
| C15—C16—H16  | 119.9     | H30B—C30—H30C | 109.5      |
| C17—C16—H16  | 119.9     | F4—C20—F2     | 107.5 (4)  |
| C18—C17—C16  | 120.3 (4) | F4—C20—F3     | 104.6 (4)  |
| C18—C17—C20A | 120.8 (4) | F2—C20—F3     | 104.9 (4)  |
| C16—C17—C20A | 118.9 (4) | F4—C20—C17    | 113.5 (4)  |
| C18—C17—C20  | 120.8 (4) | F2—C20—C17    | 112.7 (4)  |
| C16—C17—C20  | 118.9 (4) | F3—C20—C17    | 112.9 (4)  |
| C17—C18—C19  | 120.1 (4) | F4A—C20A—F2A  | 108.0 (14) |
| C17—C18—H18  | 119.9     | F4A—C20A—F3A  | 104.9 (13) |

|                  |            |                     |            |
|------------------|------------|---------------------|------------|
| C19—C18—H18      | 119.9      | F2A—C20A—F3A        | 103.9 (13) |
| C14—C19—C18      | 118.8 (4)  | F4A—C20A—C17        | 115.7 (10) |
| C14—C19—H19      | 120.6      | F2A—C20A—C17        | 111.3 (10) |
| C18—C19—H19      | 120.6      | F3A—C20A—C17        | 112.3 (10) |
| N2—C21—C22       | 113.1 (3)  |                     |            |
|                  |            |                     |            |
| O2—P1—O3—<br>C14 | -67.5 (3)  | C9—C10—C11—F1       | -179.9 (3) |
| N2—P1—O3—<br>C14 | 57.9 (3)   | C9—C10—C11—C12      | -1.3 (6)   |
| C4—P1—O3—<br>C14 | 170.8 (3)  | F1—C11—C12—C13      | 178.9 (3)  |
| O2—P1—N2—<br>C26 | 13.7 (4)   | C10—C11—C12—<br>C13 | 0.3 (6)    |
| O3—P1—N2—<br>C26 | -112.9 (3) | C11—C12—C13—C8      | 0.6 (6)    |
| C4—P1—N2—<br>C26 | 140.5 (3)  | C9—C8—C13—C12       | -0.5 (6)   |
| O2—P1—N2—<br>C21 | -171.4 (3) | C7—C8—C13—C12       | 177.7 (4)  |

|                  |            |                      |            |
|------------------|------------|----------------------|------------|
| O3—P1—N2—<br>C21 | 61.9 (3)   | P1—O3—C14—C19        | -109.6 (4) |
| C4—P1—N2—<br>C21 | -44.7 (3)  | P1—O3—C14—C15        | 72.3 (4)   |
| C7—O1—C1—C2      | -179.9 (4) | C19—C14—C15—<br>C16  | 0.9 (6)    |
| C7—O1—C1—C6      | 0.5 (4)    | O3—C14—C15—<br>C16   | 178.9 (4)  |
| O1—C1—C2—C3      | -178.8 (4) | C14—C15—C16—<br>C17  | -0.4 (6)   |
| C6—C1—C2—C3      | 0.7 (6)    | C15—C16—C17—<br>C18  | -0.2 (6)   |
| C1—C2—C3—C4      | -0.9 (6)   | C15—C16—C17—<br>C20A | 179.9 (4)  |
| C2—C3—C4—C5      | 0.6 (6)    | C15—C16—C17—<br>C20  | 179.9 (4)  |
| C2—C3—C4—P1      | -174.6 (3) | C16—C17—C18—<br>C19  | 0.3 (7)    |
| O2—P1—C4—C5      | 31.7 (4)   | C20A—C17—C18—<br>C19 | -179.9 (4) |

|             |            |                     |            |
|-------------|------------|---------------------|------------|
| O3—P1—C4—C5 | 153.5 (3)  | C20—C17—C18—<br>C19 | -179.9 (4) |
| N2—P1—C4—C5 | -93.9 (3)  | C15—C14—C19—<br>C18 | -0.8 (6)   |
| O2—P1—C4—C3 | -152.9 (3) | O3—C14—C19—<br>C18  | -178.9 (4) |
| O3—P1—C4—C3 | -31.1 (4)  | C17—C18—C19—<br>C14 | 0.2 (6)    |
| N2—P1—C4—C3 | 81.5 (4)   | C26—N2—C21—<br>C22  | -90.9 (4)  |
| C3—C4—C5—C6 | 0.0 (6)    | P1—N2—C21—C22       | 94.0 (4)   |
| P1—C4—C5—C6 | 175.4 (3)  | N2—C21—C22—<br>C23  | -177.3 (3) |
| C4—C5—C6—C1 | -0.2 (6)   | C21—C22—C23—<br>C24 | -82.4 (4)  |
| C4—C5—C6—N1 | 179.4 (4)  | C21—C22—C23—<br>C25 | 154.0 (4)  |
| O1—C1—C6—C5 | 179.4 (4)  | C21—N2—C26—<br>C27  | -82.0 (4)  |
| C2—C1—C6—C5 | -0.2 (6)   | P1—N2—C26—C27       | 93.1 (4)   |

|                   |            |                      |             |
|-------------------|------------|----------------------|-------------|
| O1—C1—C6—N1       | -0.2 (4)   | N2—C26—C27—<br>C28   | 166.9 (4)   |
| C2—C1—C6—N1       | -179.8 (4) | C26—C27—C28—<br>C29  | -177.3 (4)  |
| C7—N1—C6—C5       | -179.8 (4) | C26—C27—C28—<br>C30  | 59.2 (6)    |
| C7—N1—C6—C1       | -0.2 (4)   | C18—C17—C20—F4       | -122.4 (6)  |
| C6—N1—C7—O1       | 0.6 (4)    | C16—C17—C20—F4       | 57.4 (6)    |
| C6—N1—C7—C8       | 178.3 (4)  | C18—C17—C20—F2       | 115.1 (6)   |
| C1—O1—C7—N1       | -0.8 (4)   | C16—C17—C20—F2       | -65.1 (6)   |
| C1—O1—C7—C8       | -178.7 (3) | C18—C17—C20—F3       | -3.6 (7)    |
| N1—C7—C8—C9       | 5.6 (6)    | C16—C17—C20—F3       | 176.2 (5)   |
| O1—C7—C8—C9       | -176.8 (3) | C18—C17—C20A—<br>F4A | 71.3 (17)   |
| N1—C7—C8—<br>C13  | -172.6 (4) | C16—C17—C20A—<br>F4A | -108.9 (17) |
| O1—C7—C8—<br>C13  | 5.1 (5)    | C18—C17—C20A—<br>F2A | -52 (2)     |
| C13—C8—C9—<br>C10 | -0.6 (6)   | C16—C17—C20A—<br>F2A | 127 (2)     |

|                   |            |                      |             |
|-------------------|------------|----------------------|-------------|
| C7—C8—C9—<br>C10  | -178.8 (4) | C18—C17—C20A—<br>F3A | -168.4 (18) |
| C8—C9—C10—<br>C11 | 1.5 (6)    | C16—C17—C20A—<br>F3A | 11.4 (19)   |

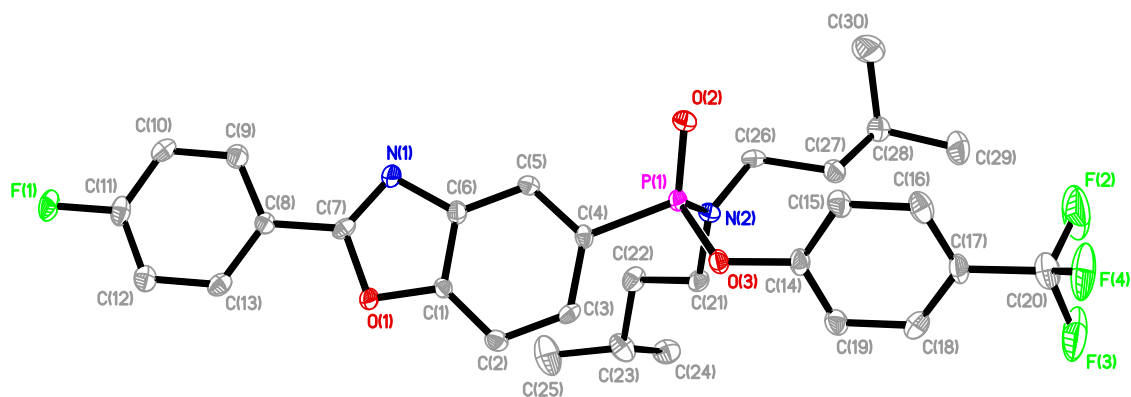

**Figure S1.** Perspective views showing 50% probability displacement

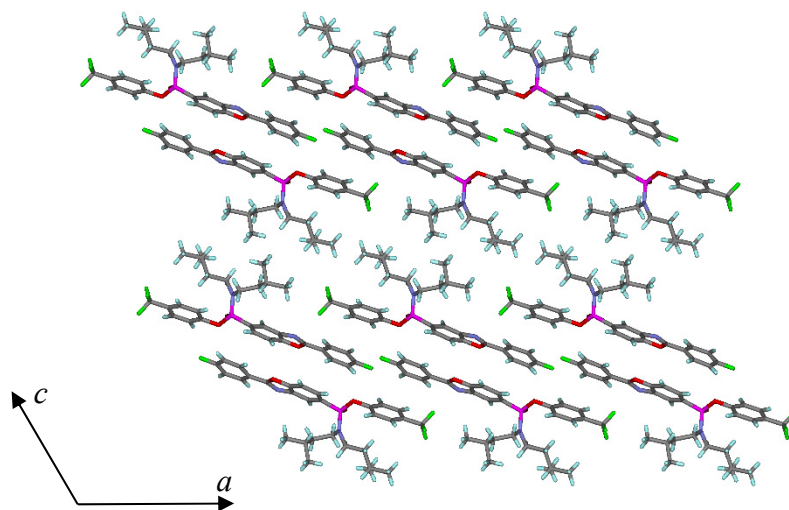

**Figure S2.** Three-dimensional supramolecular architecture viewed along the *b*-axis direction.

# NMR Spectra

## <sup>1</sup>H NMR

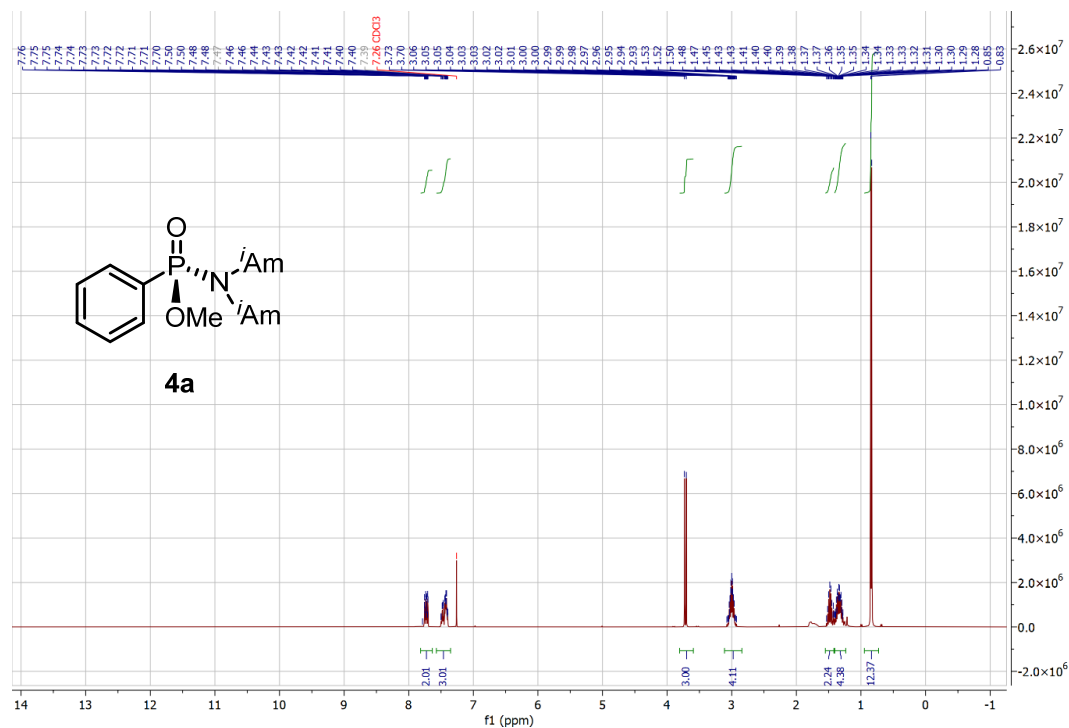

## <sup>13</sup>C NMR

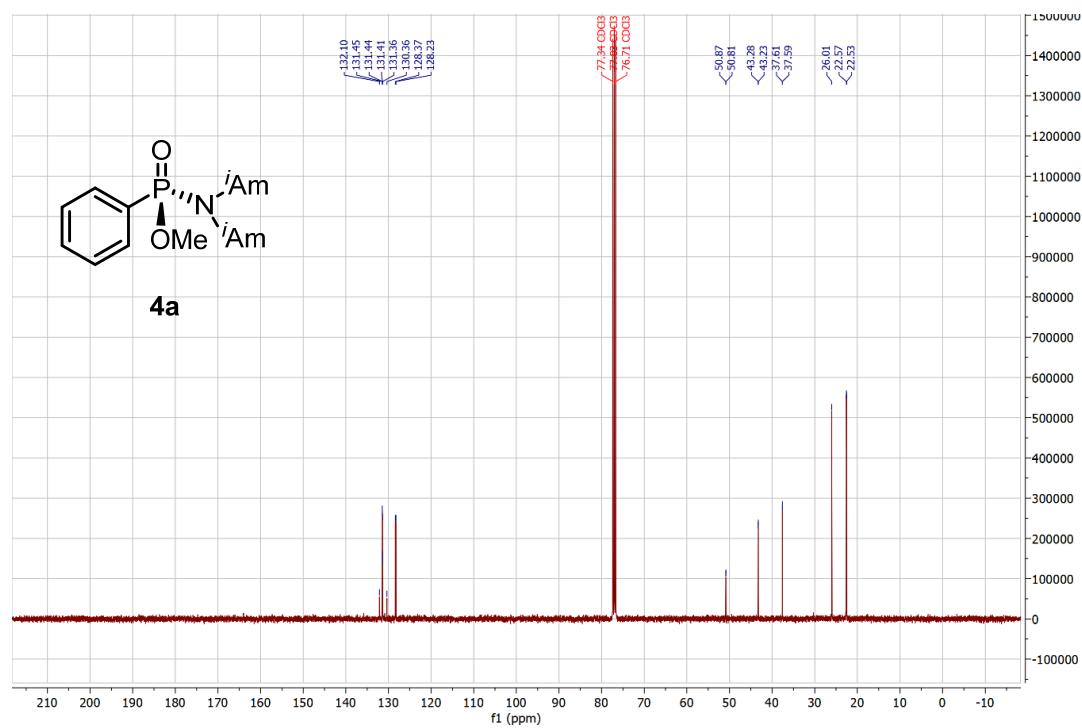



$^{31}\text{P}$  NMR

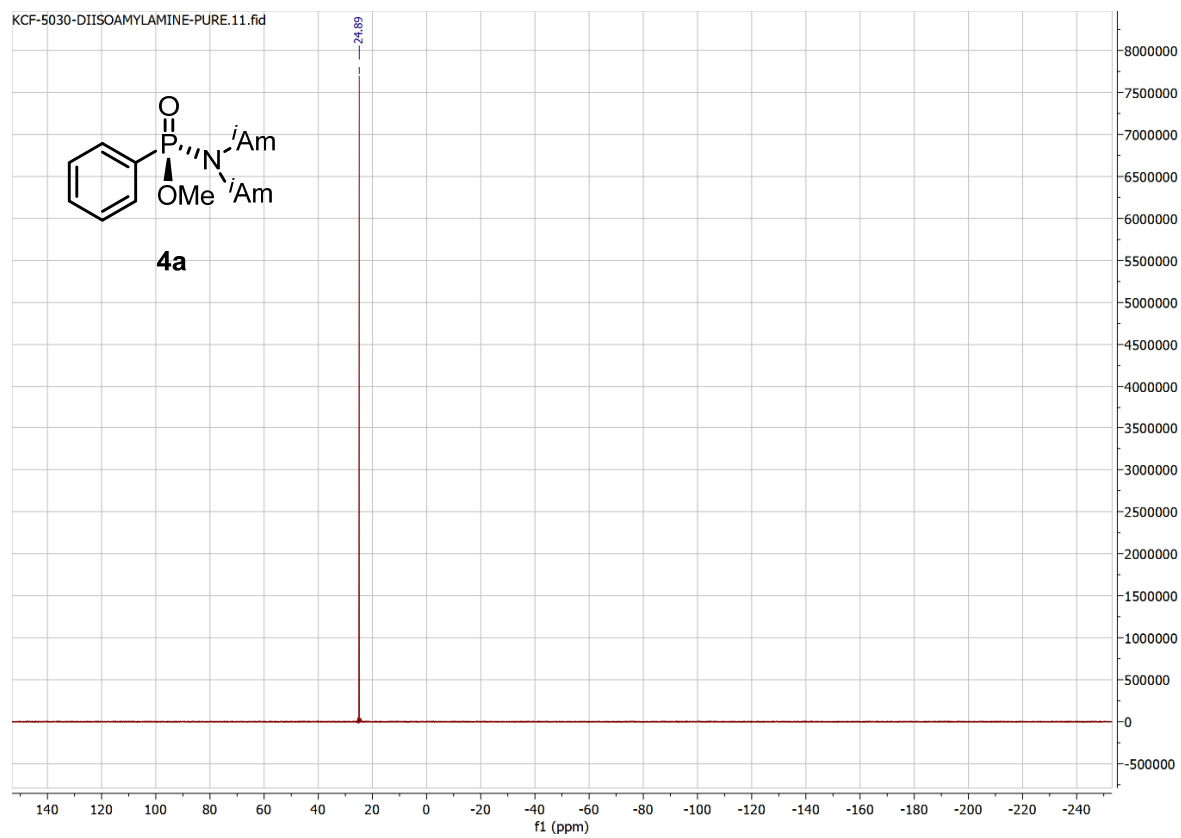

# <sup>1</sup>H NMR

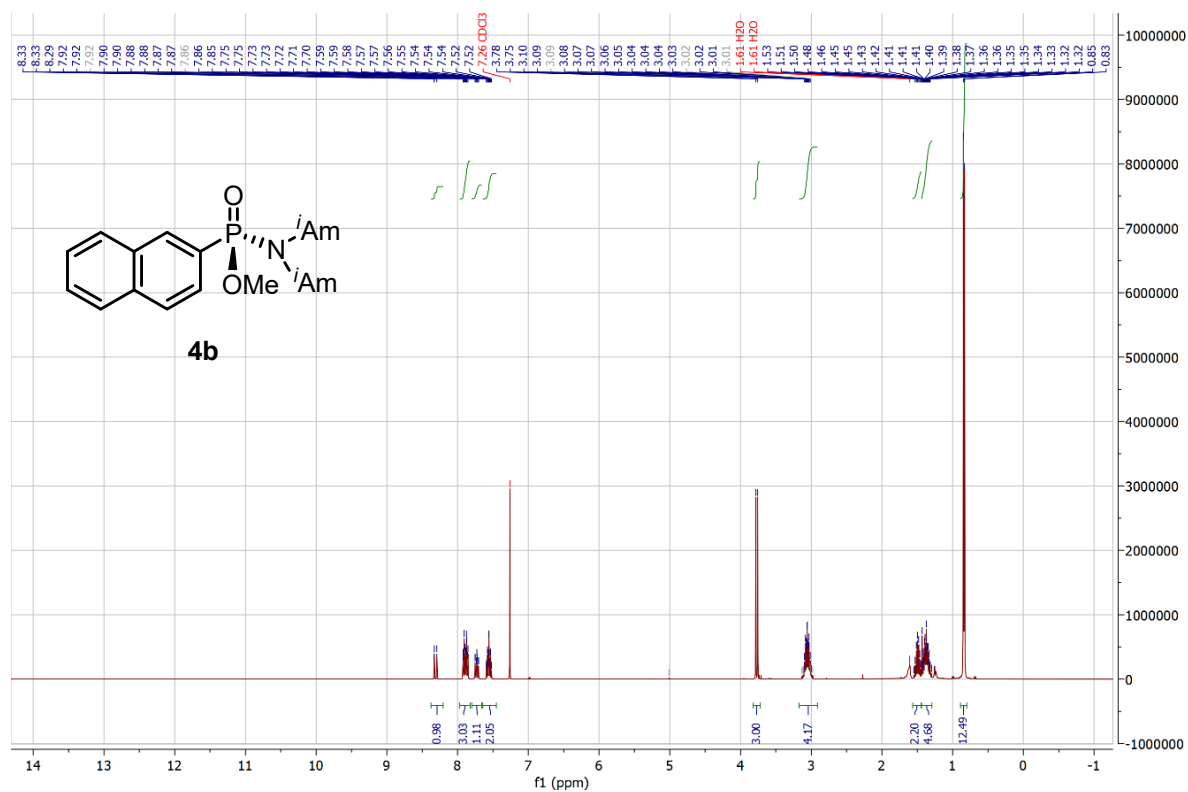

# <sup>13</sup>C NMR

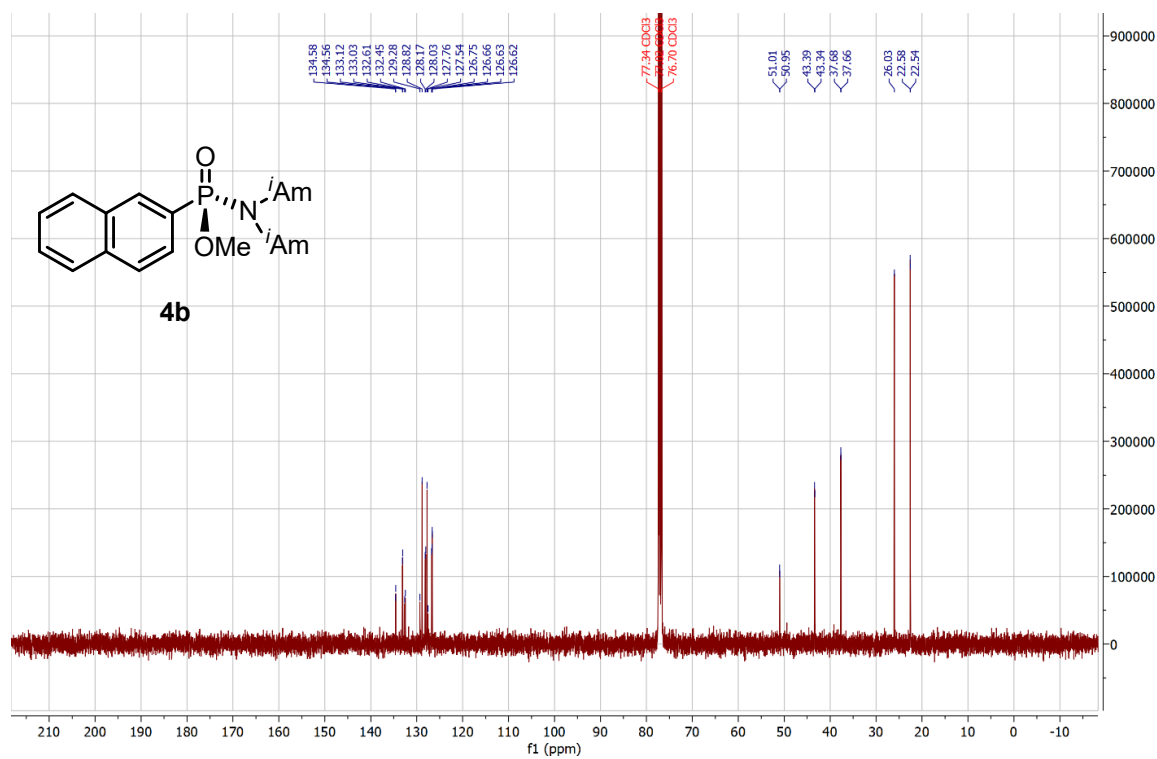

$^{31}\text{P}$  NMR

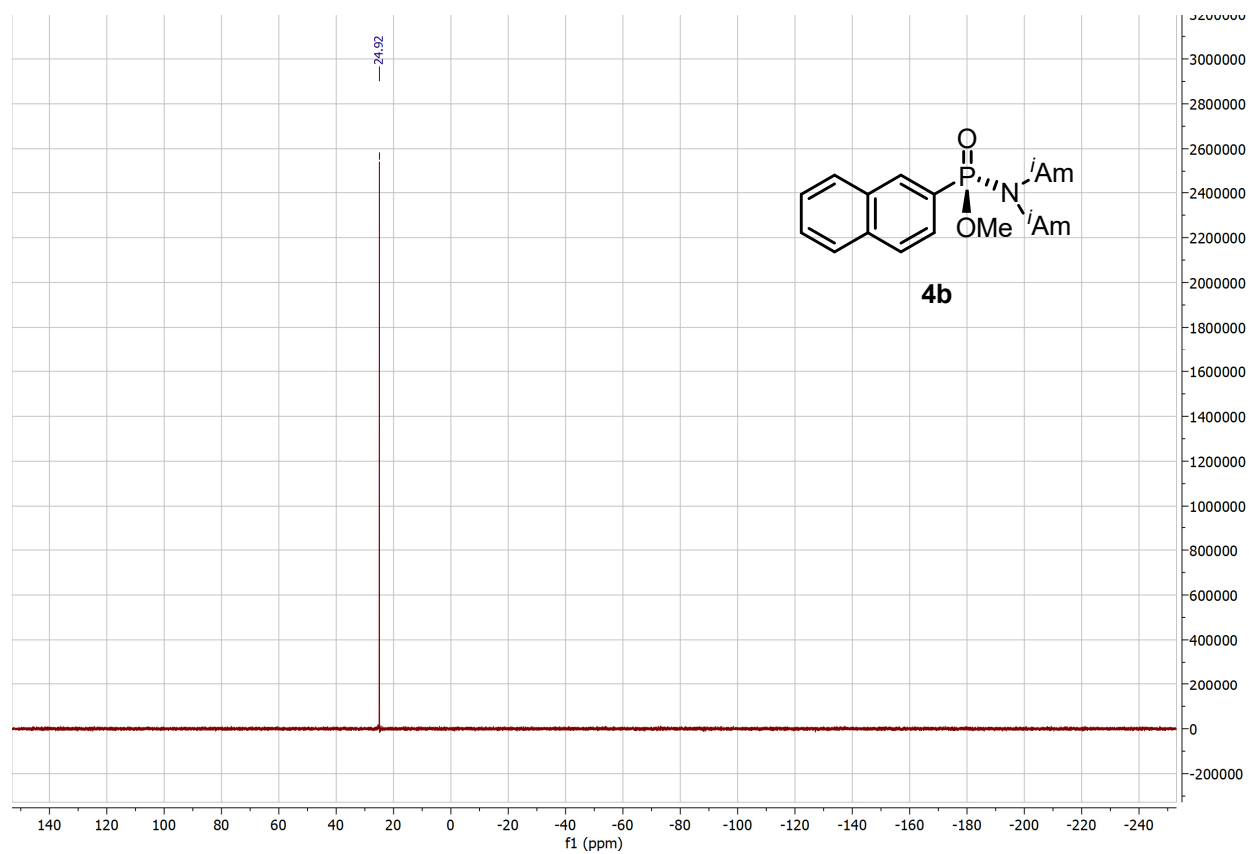

# <sup>1</sup>H NMR

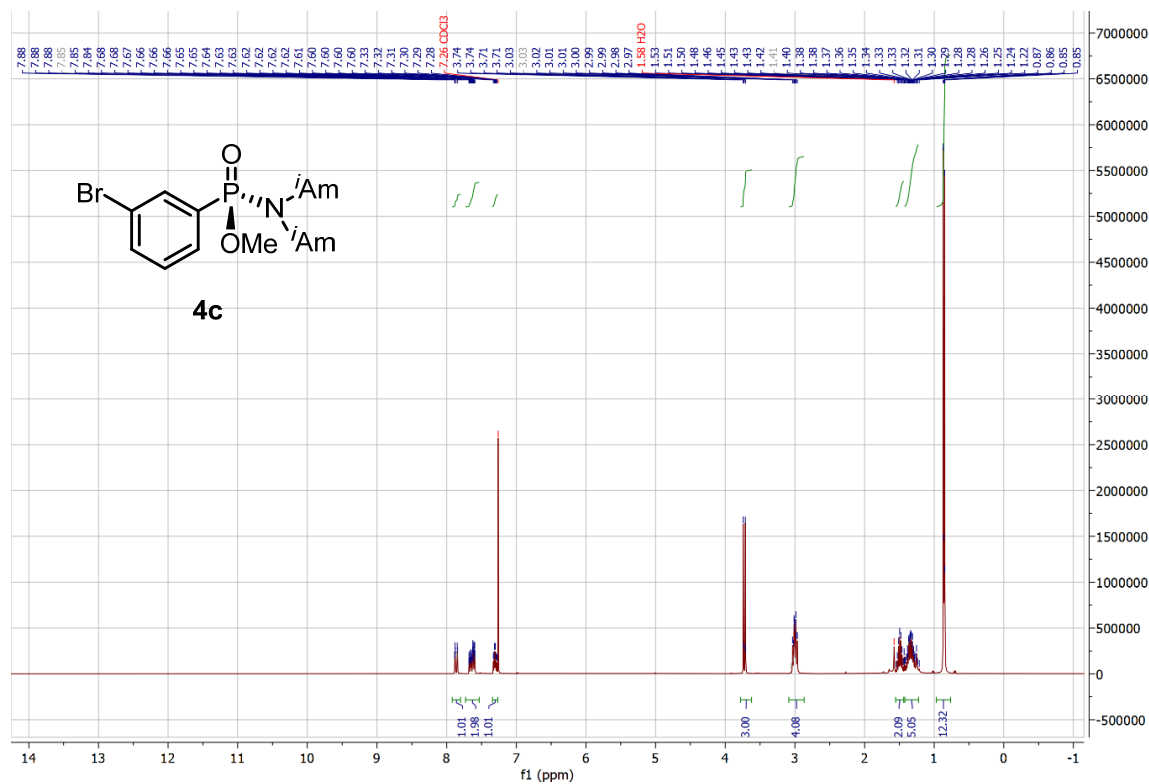

# <sup>13</sup>C NMR

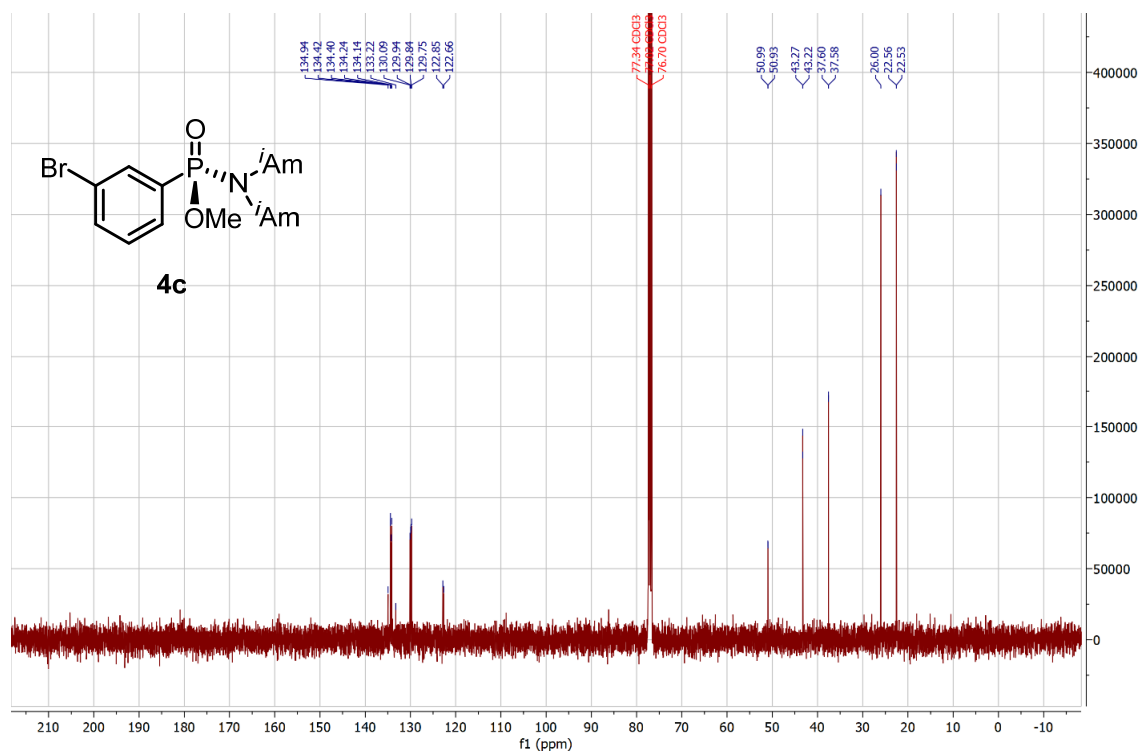

$^{31}\text{P}$  NMR

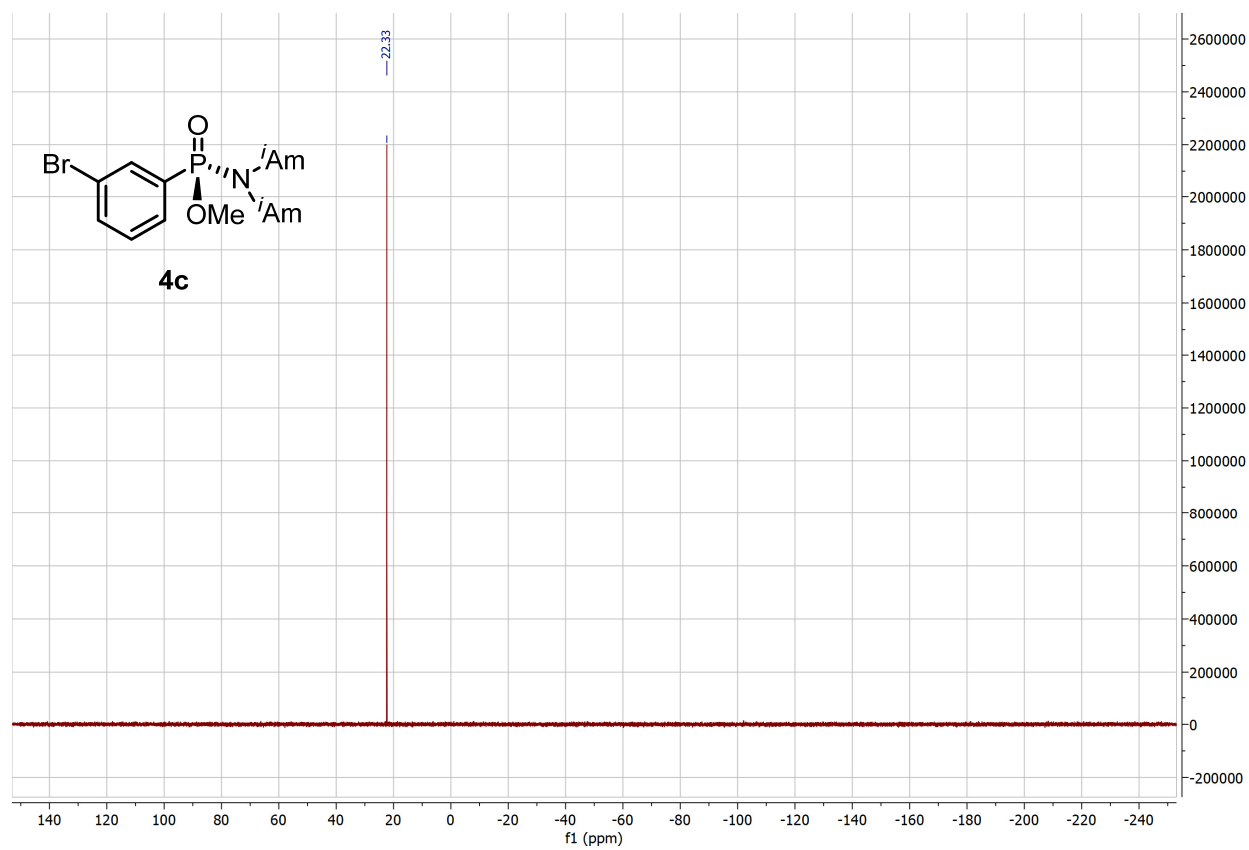

# <sup>1</sup>H NMR

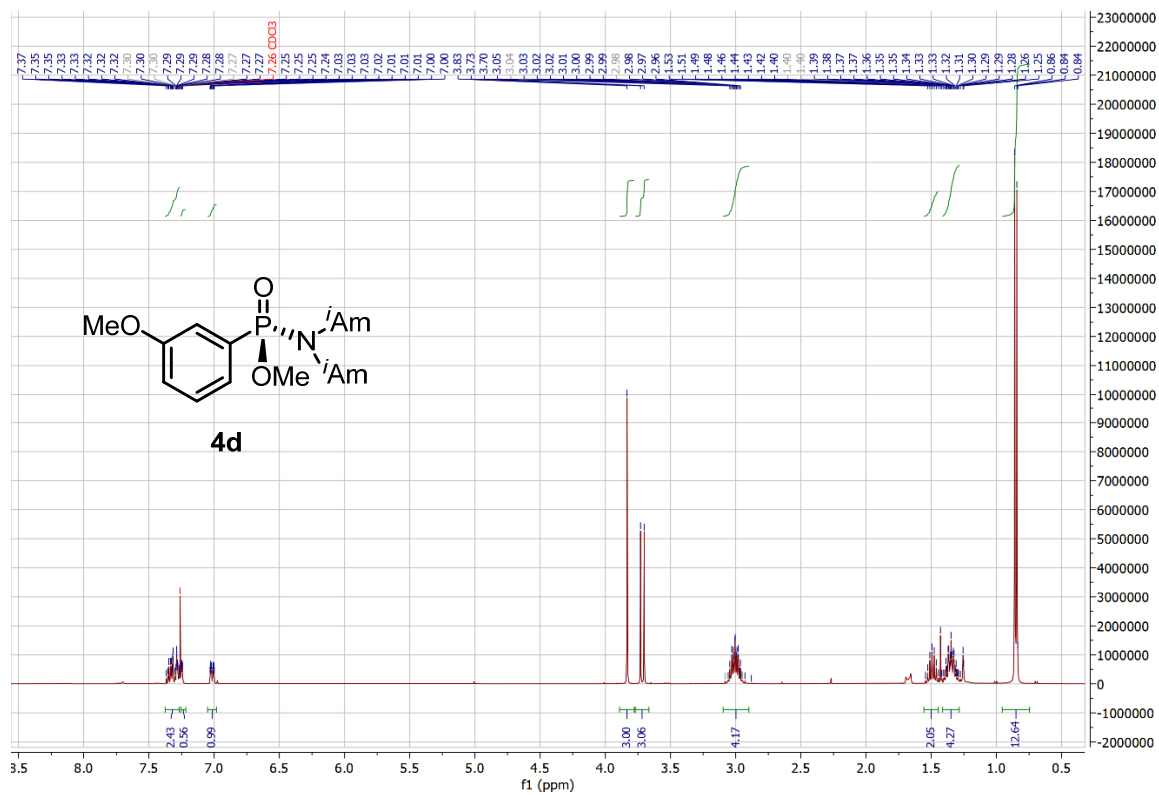

# <sup>13</sup>C NMR

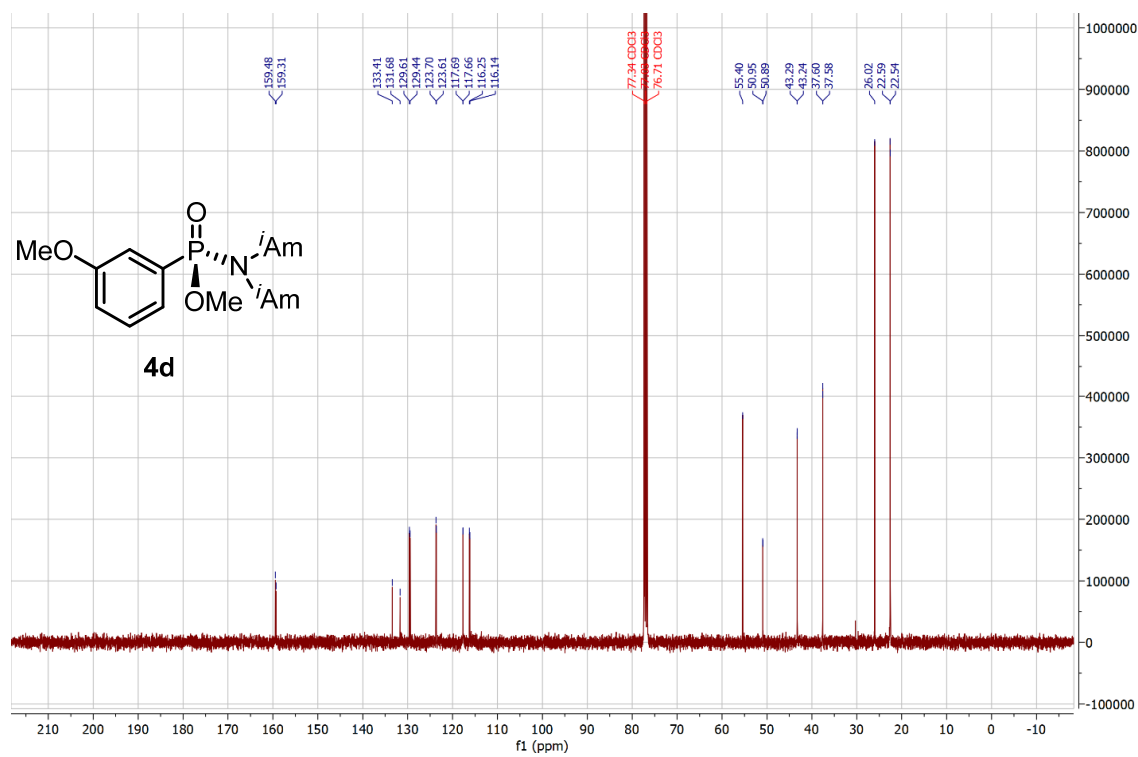

$^{31}\text{P}$  NMR

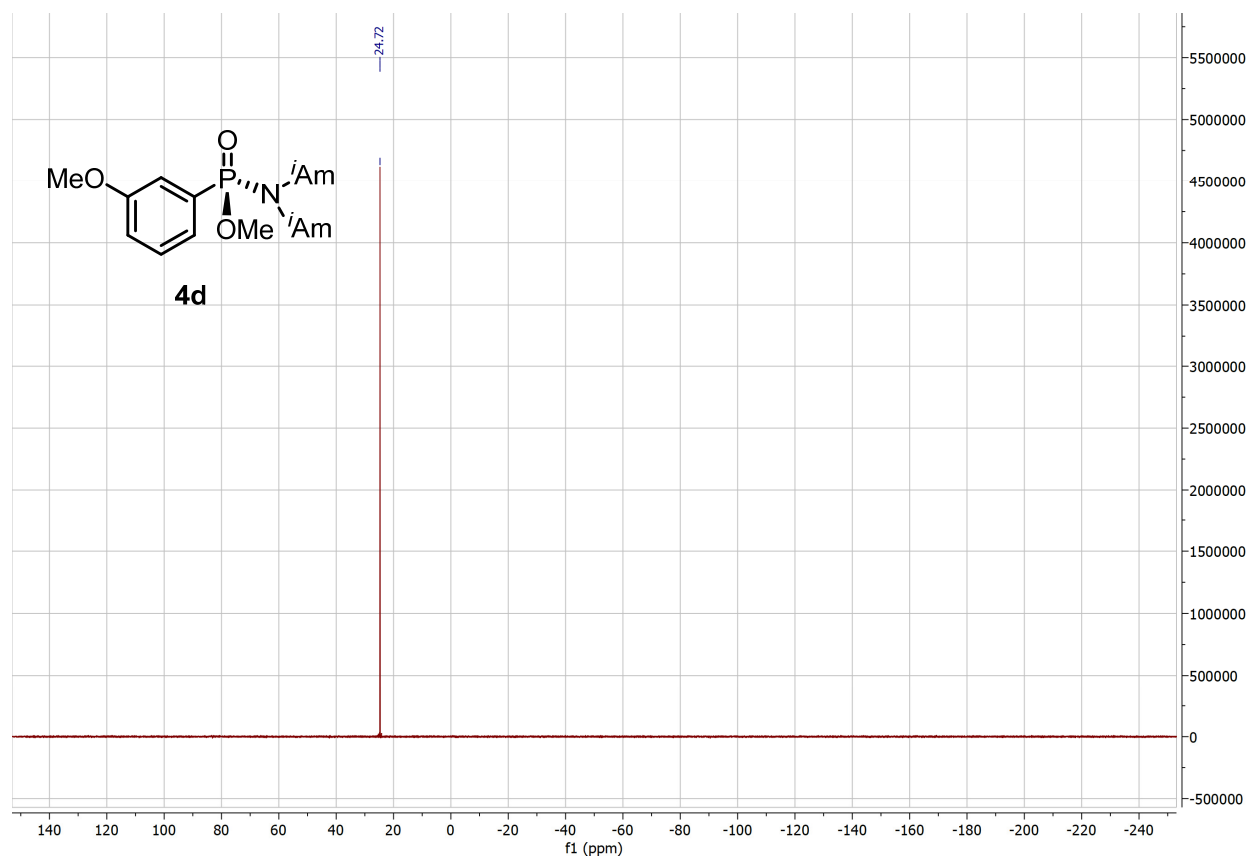





$^{31}\text{P}$  NMR

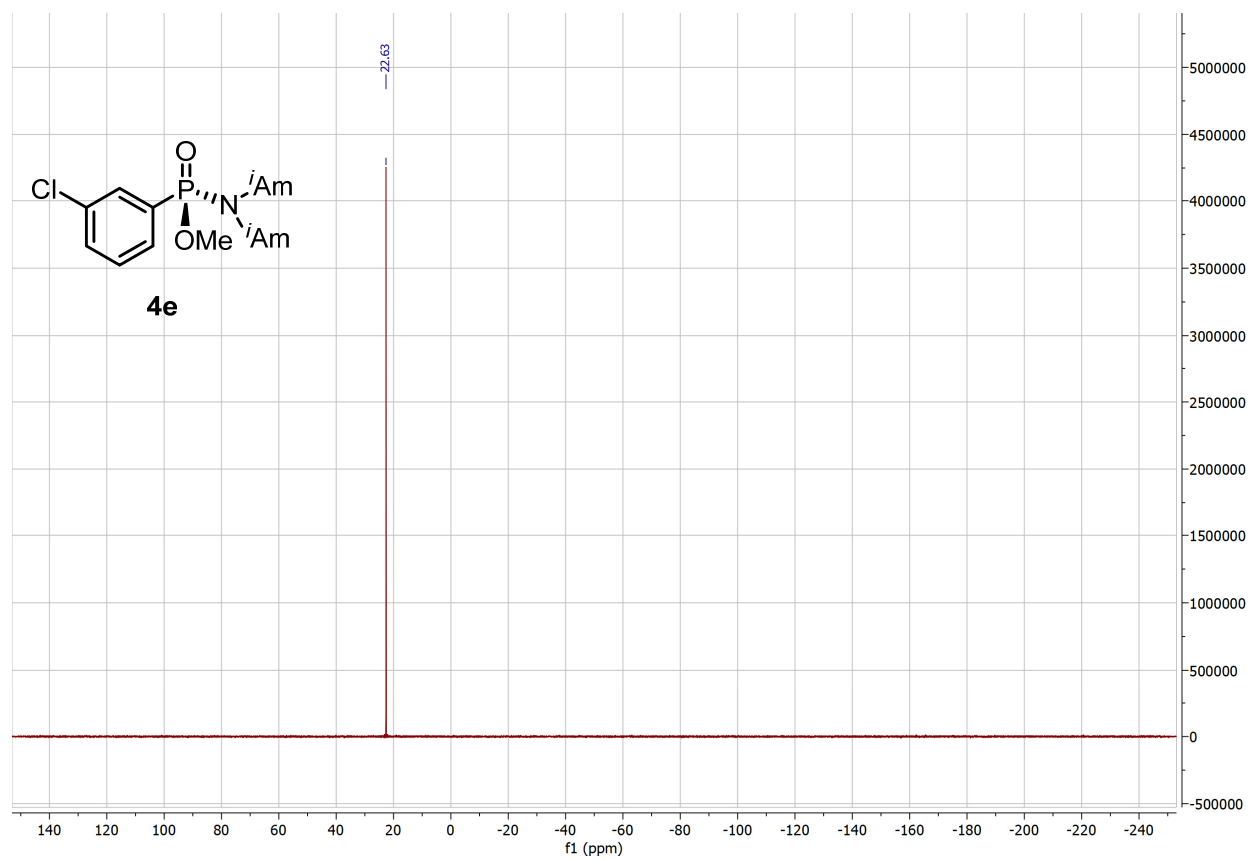

# <sup>1</sup>H NMR

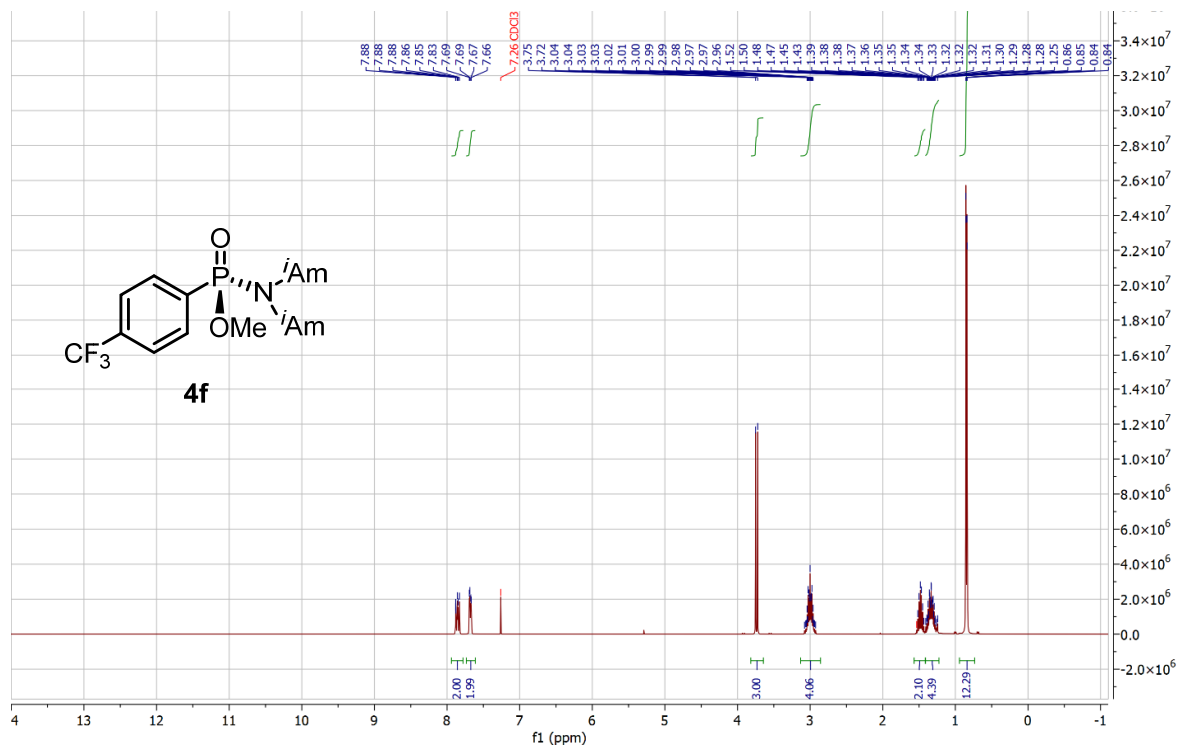

# <sup>13</sup>C NMR

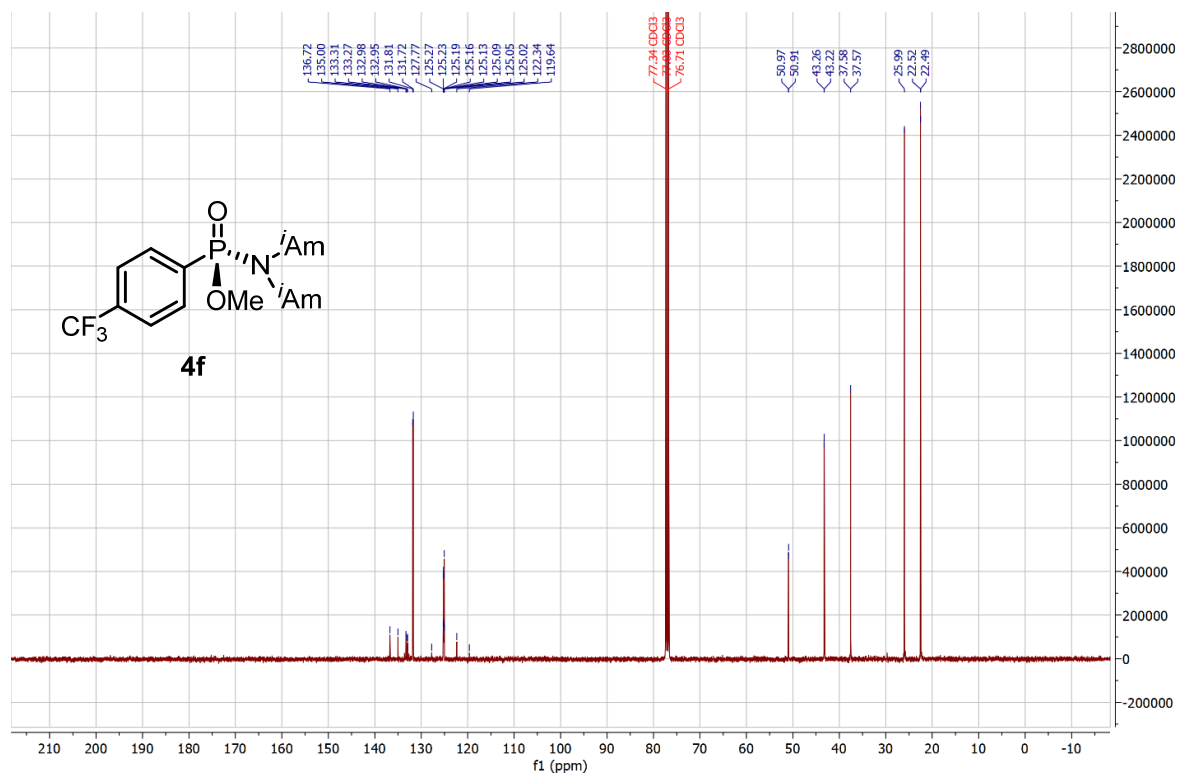

<sup>19</sup>F NMR

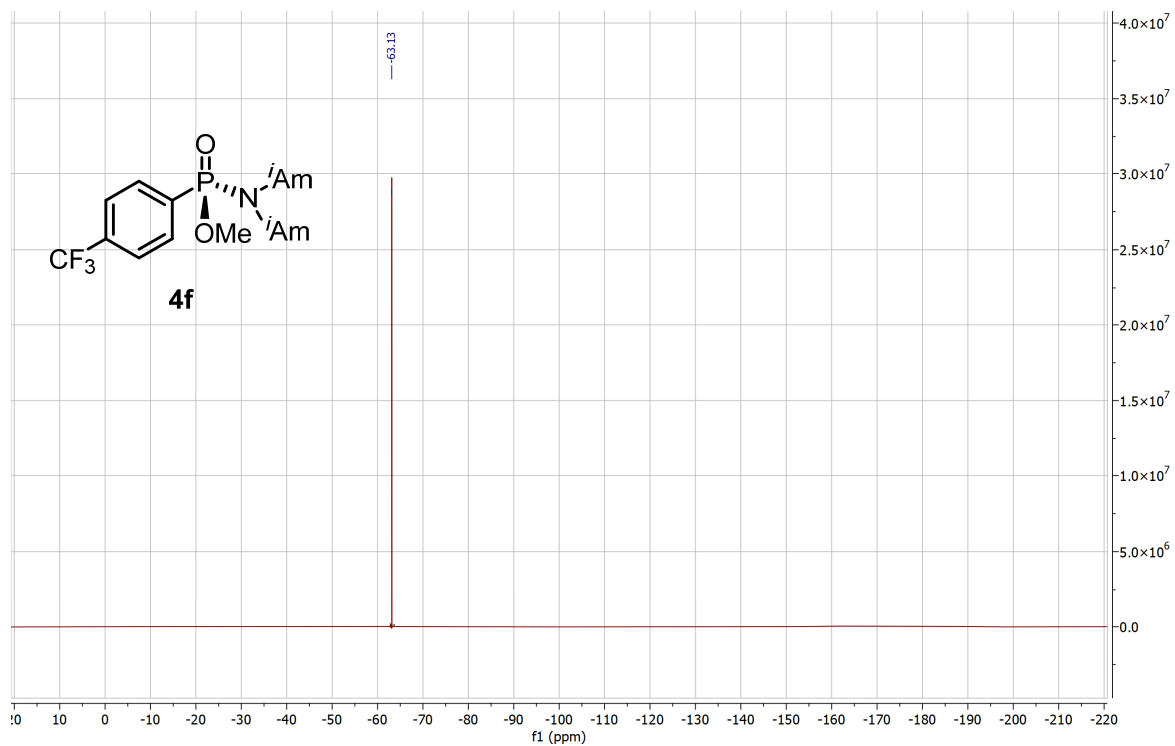

<sup>31</sup>P NMR

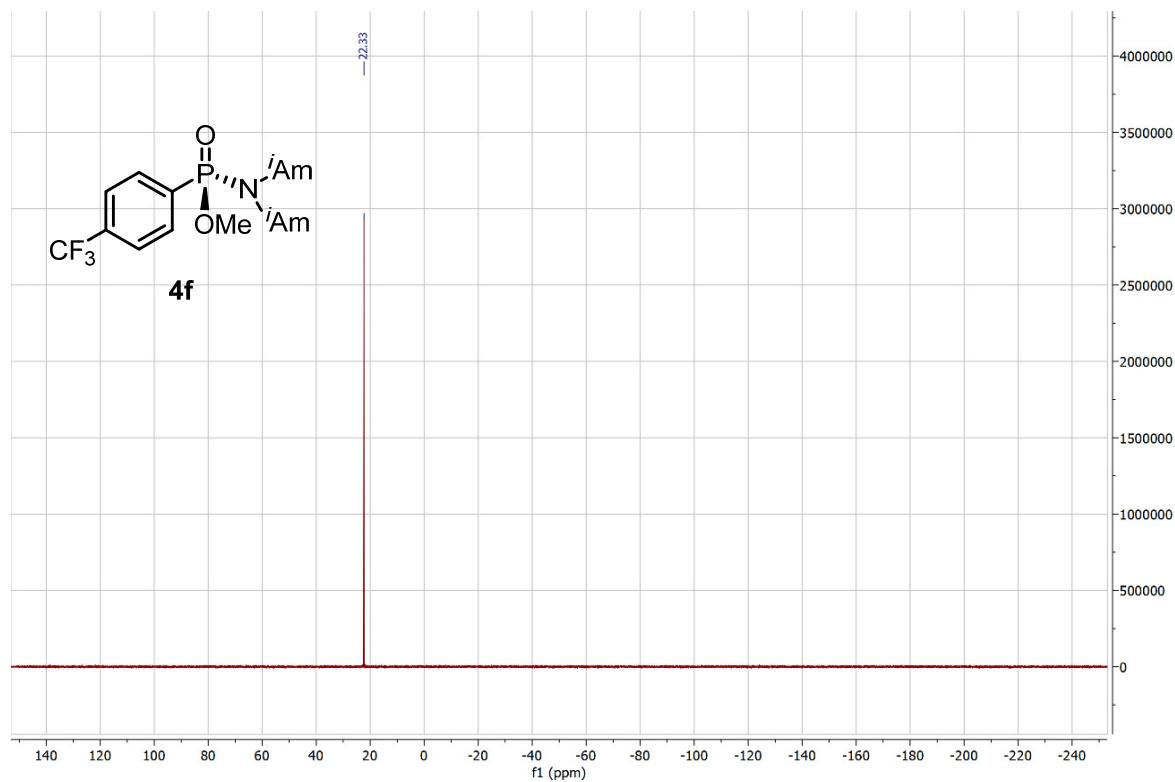

# <sup>1</sup>H NMR

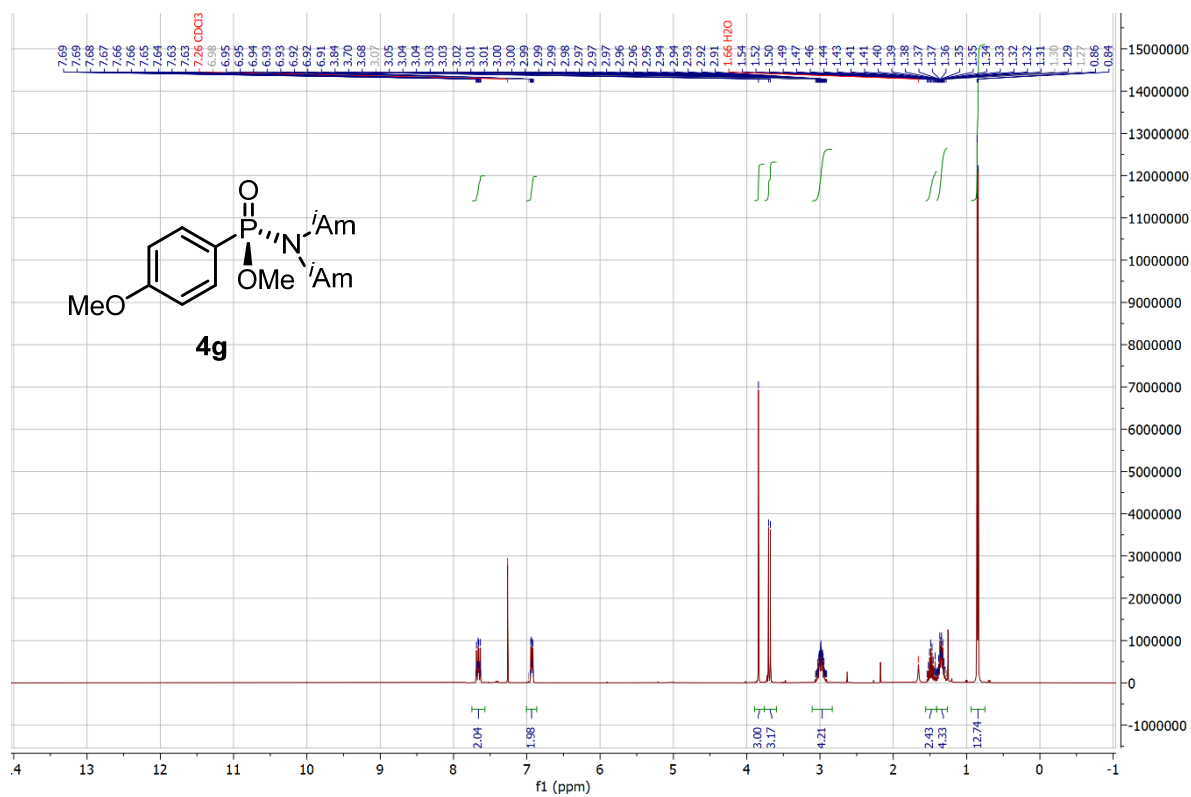

# <sup>13</sup>C NMR

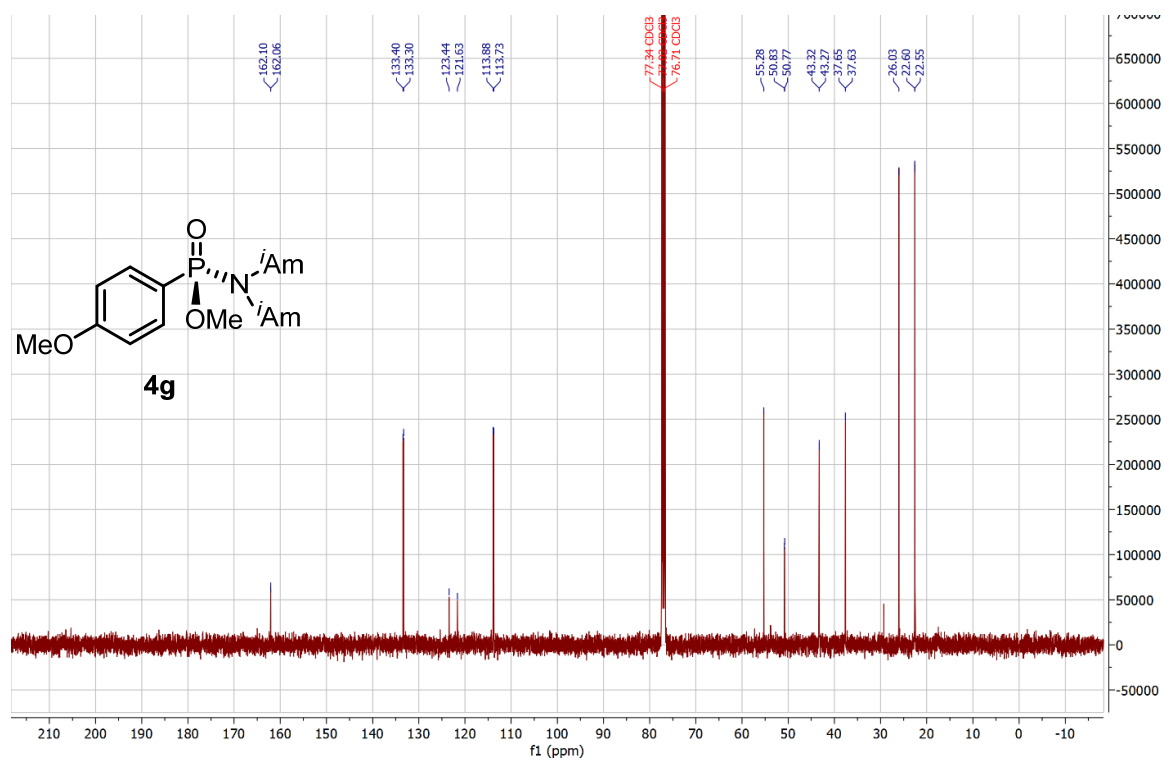

$^{31}\text{P}$  NMR

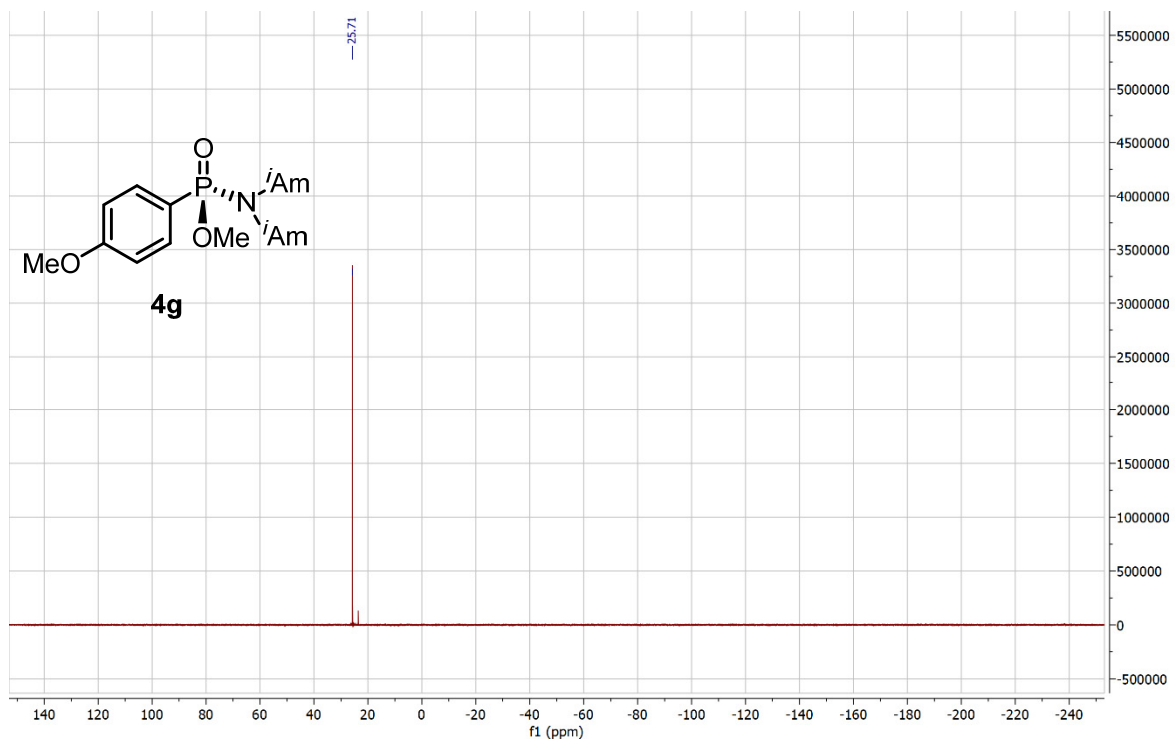

# <sup>1</sup>H NMR

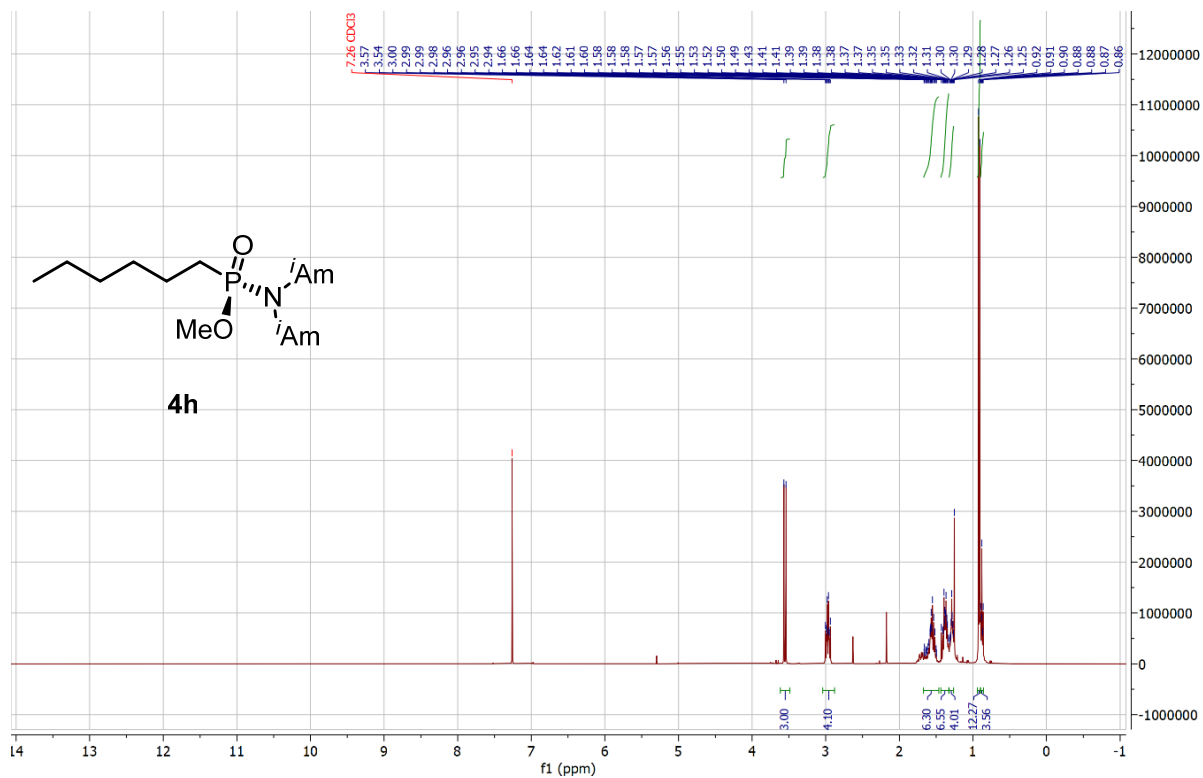

# <sup>13</sup>C NMR

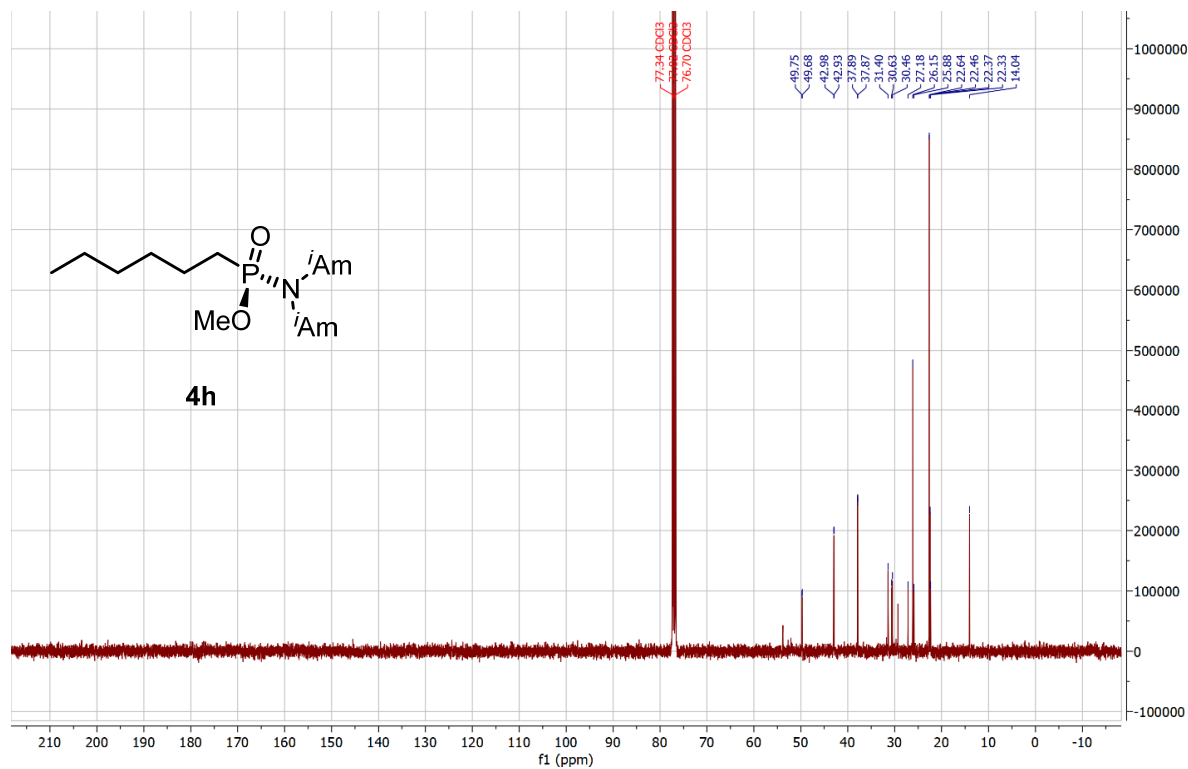

$^{31}\text{P}$  NMR

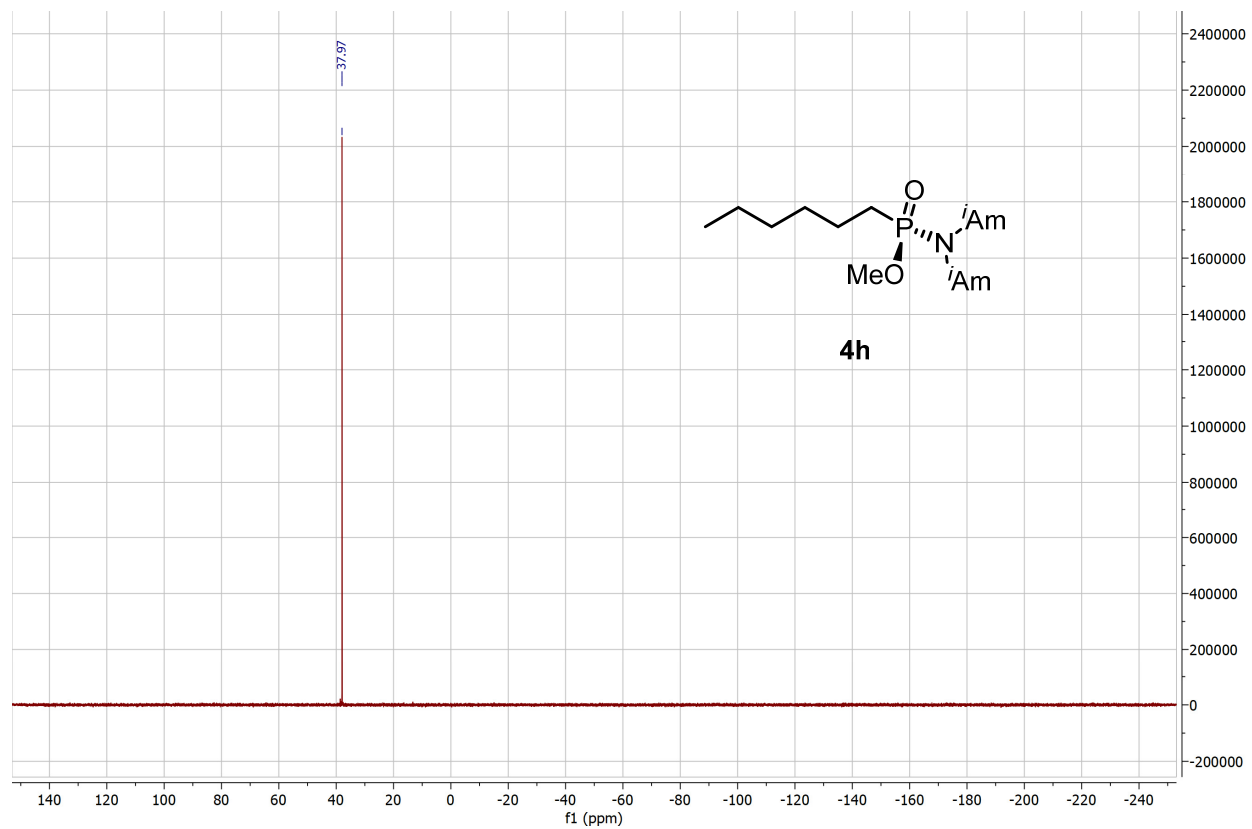

<sup>1</sup>H NMR

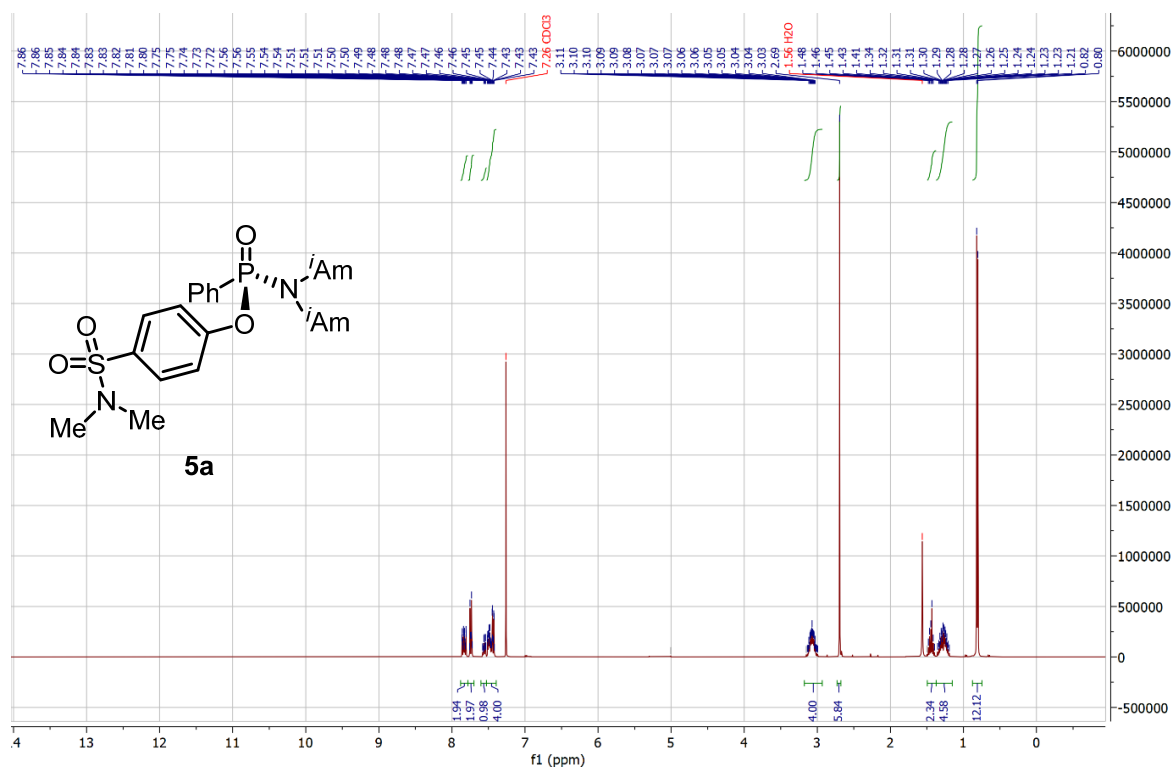

<sup>13</sup>C NMR

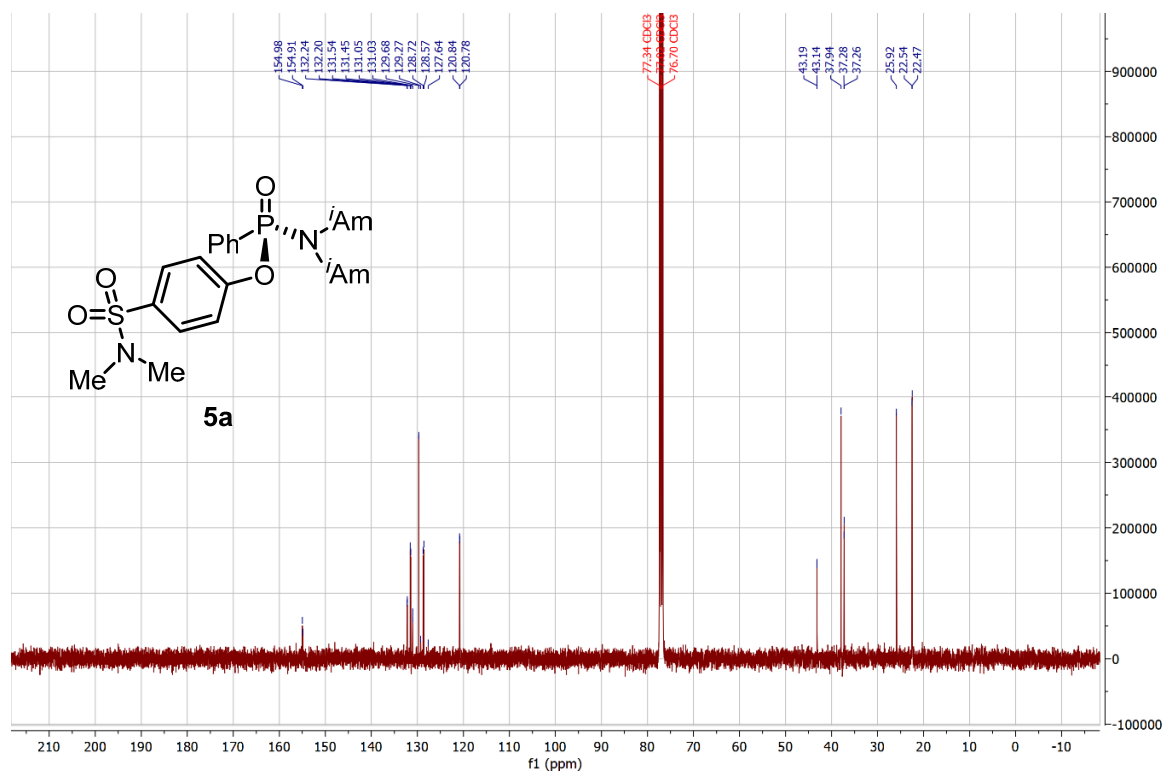



$^{31}\text{P}$  NMR

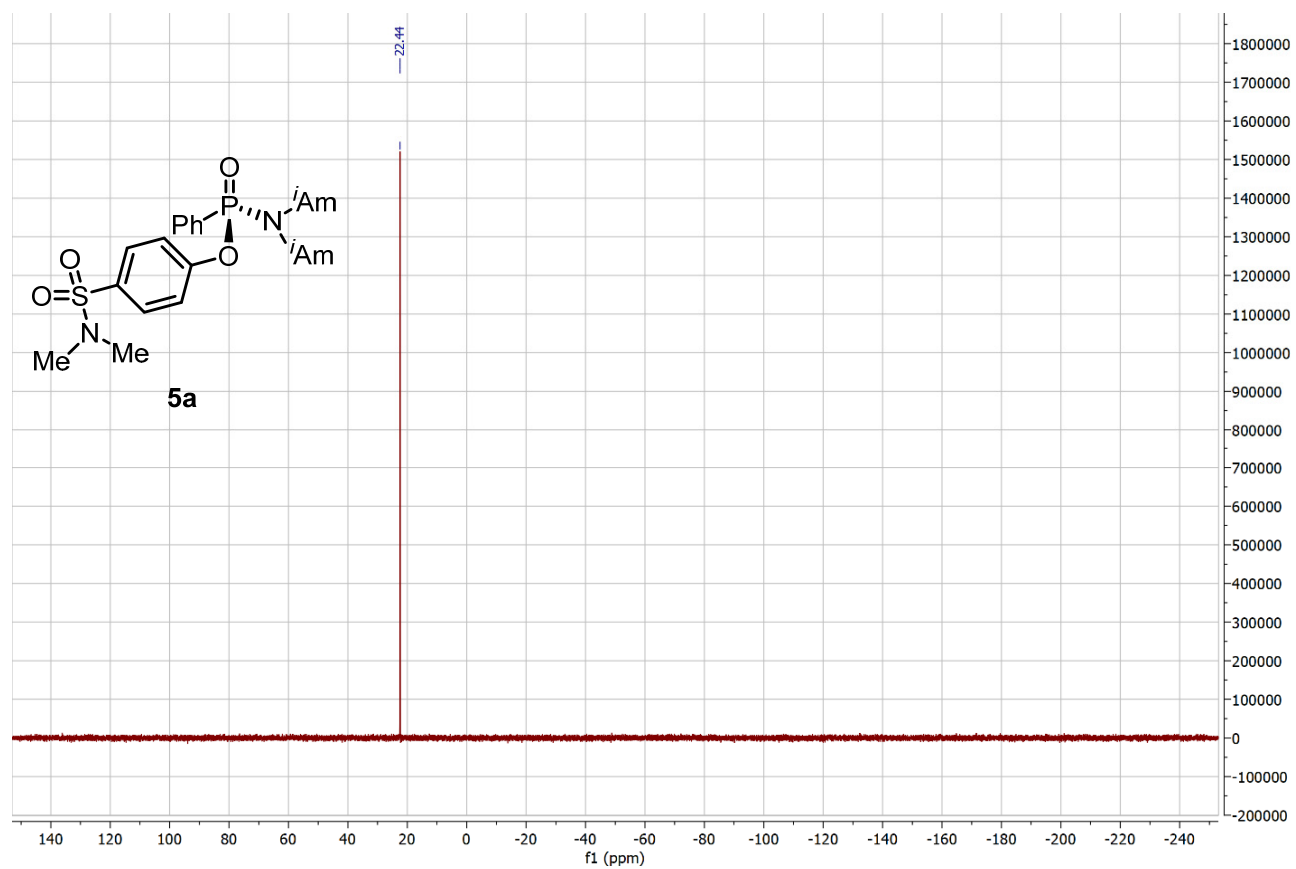

# <sup>1</sup>H NMR

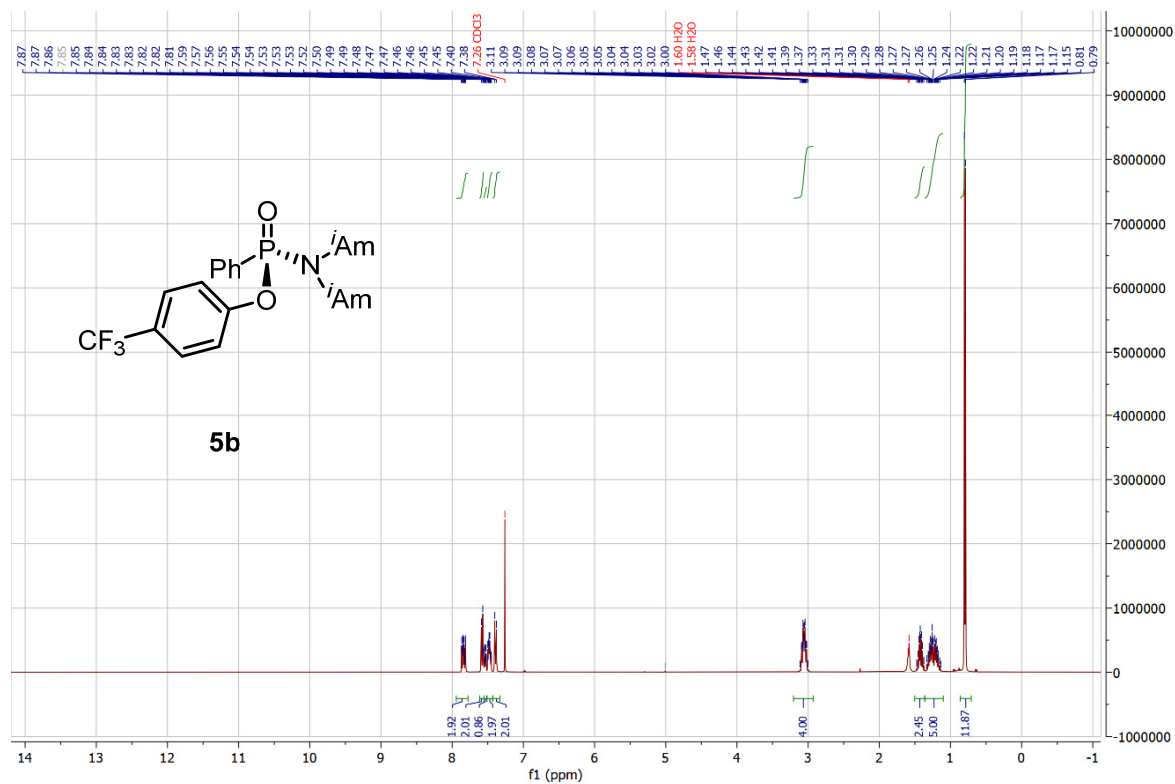

# <sup>13</sup>C NMR

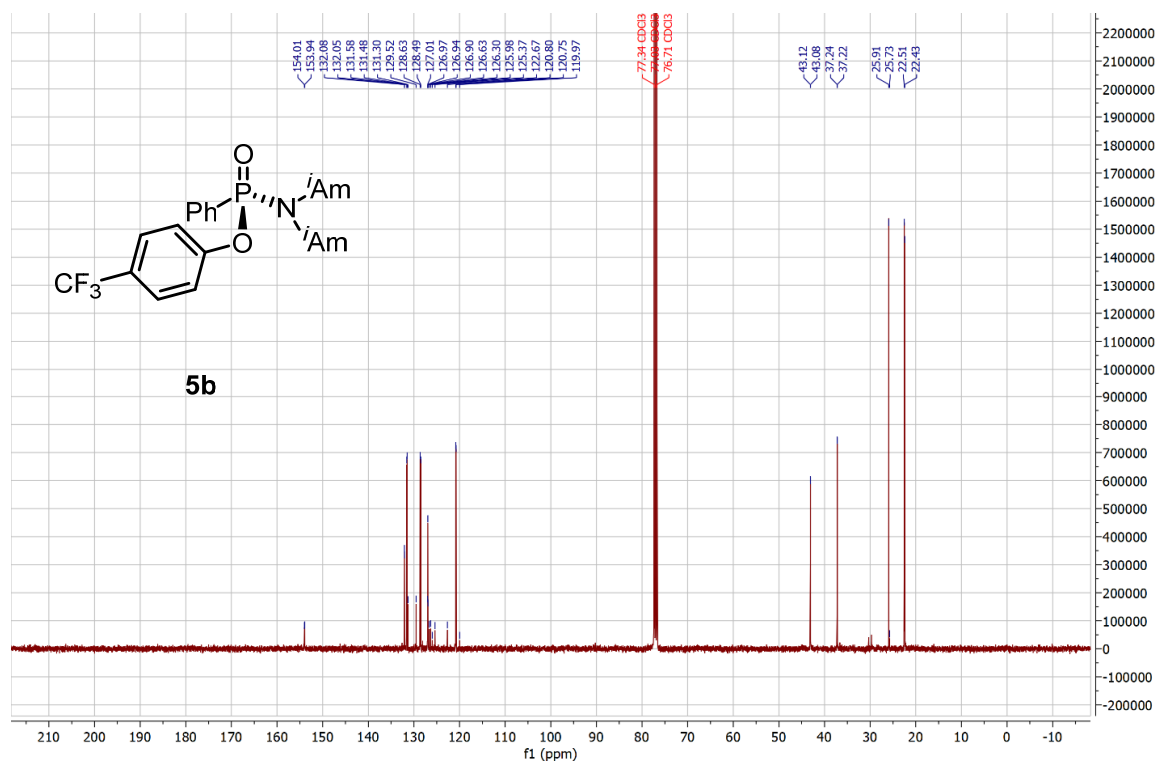

<sup>19</sup>F NMR

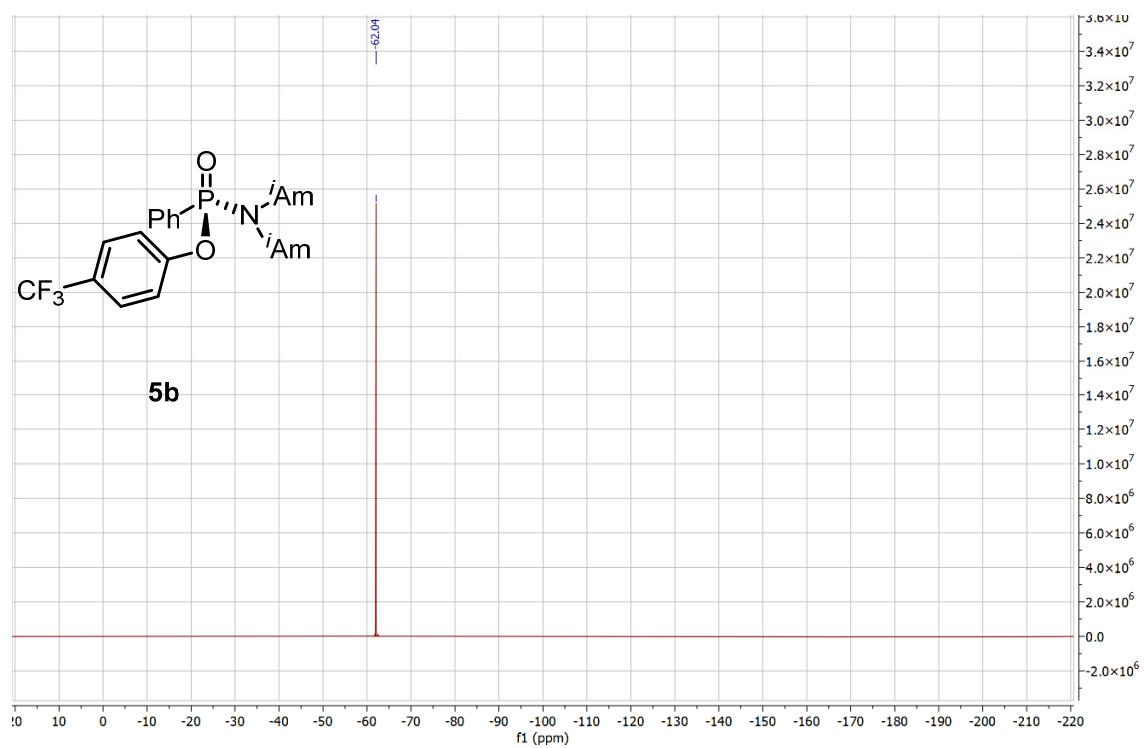

<sup>31</sup>P NMR

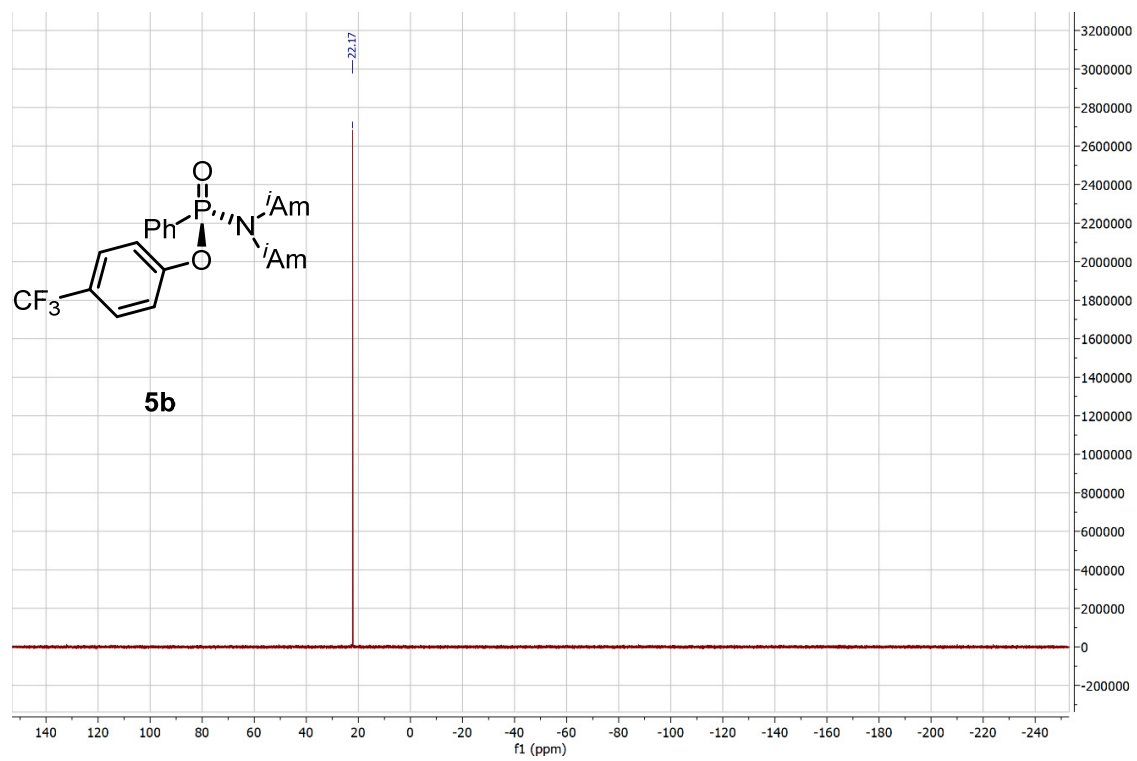

# <sup>1</sup>H NMR

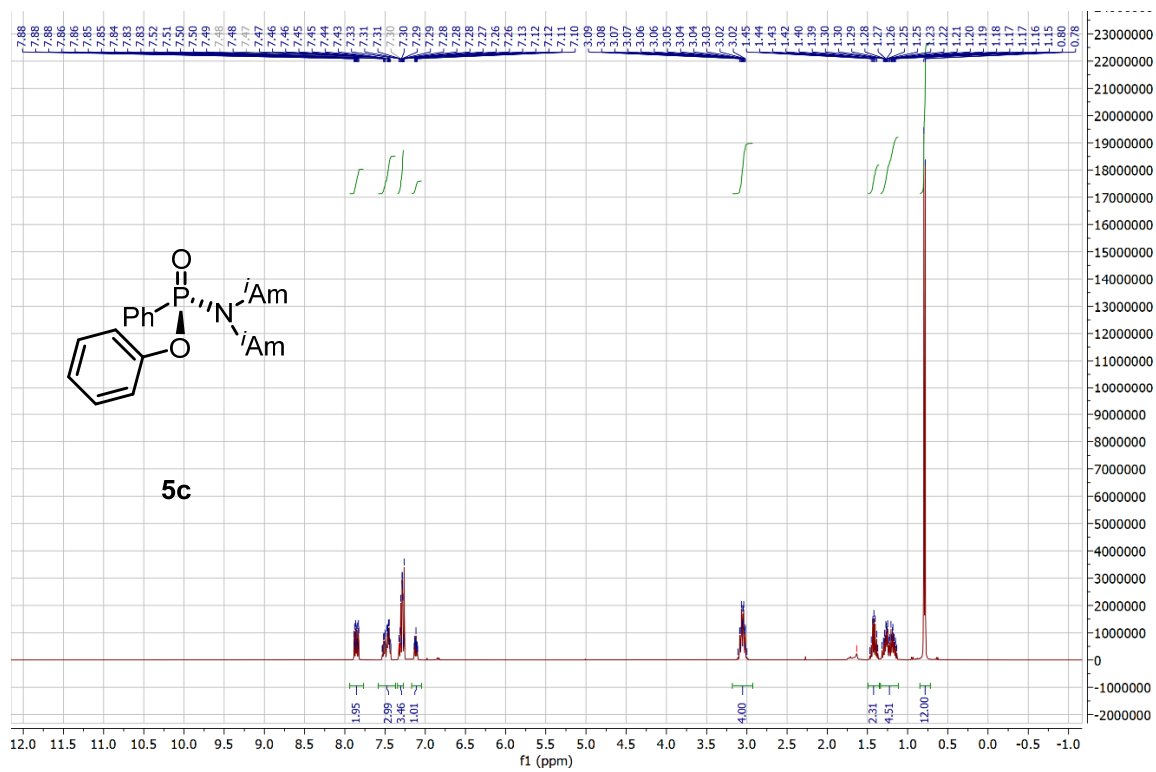

# <sup>13</sup>C NMR

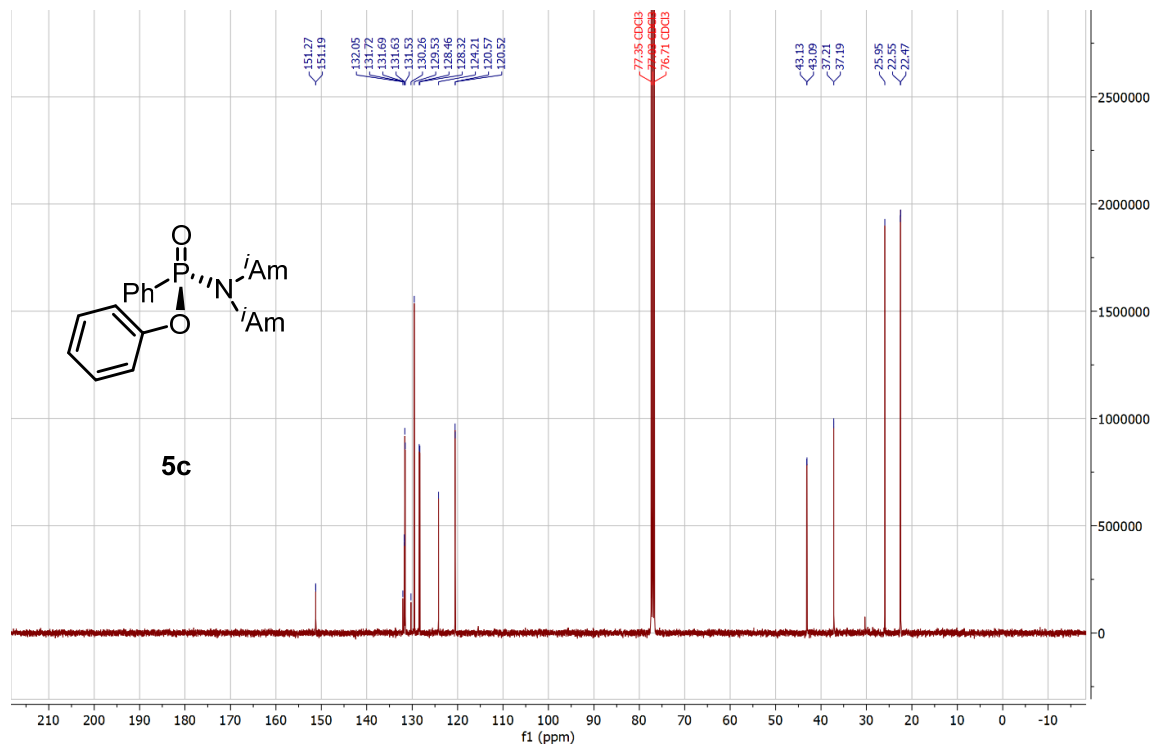

$^{31}\text{P}$  NMR

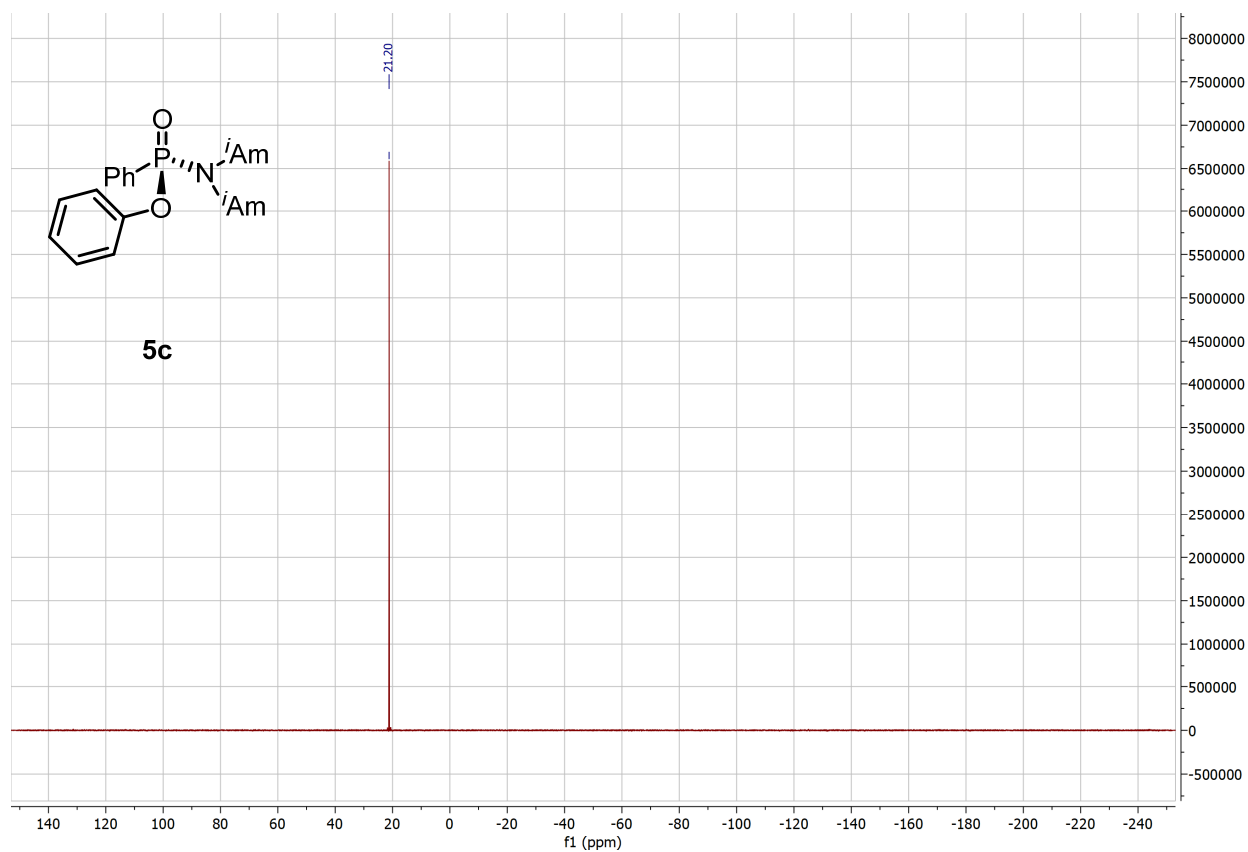

# <sup>1</sup>H NMR

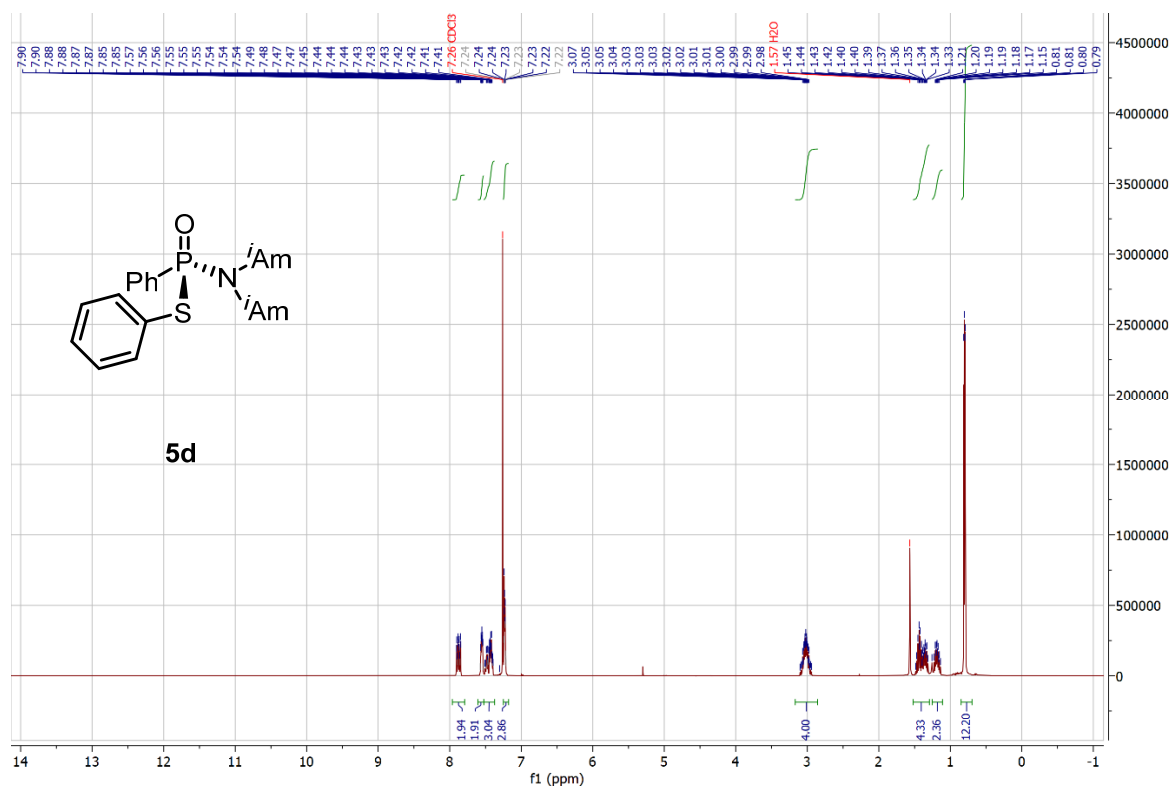

# <sup>13</sup>C NMR

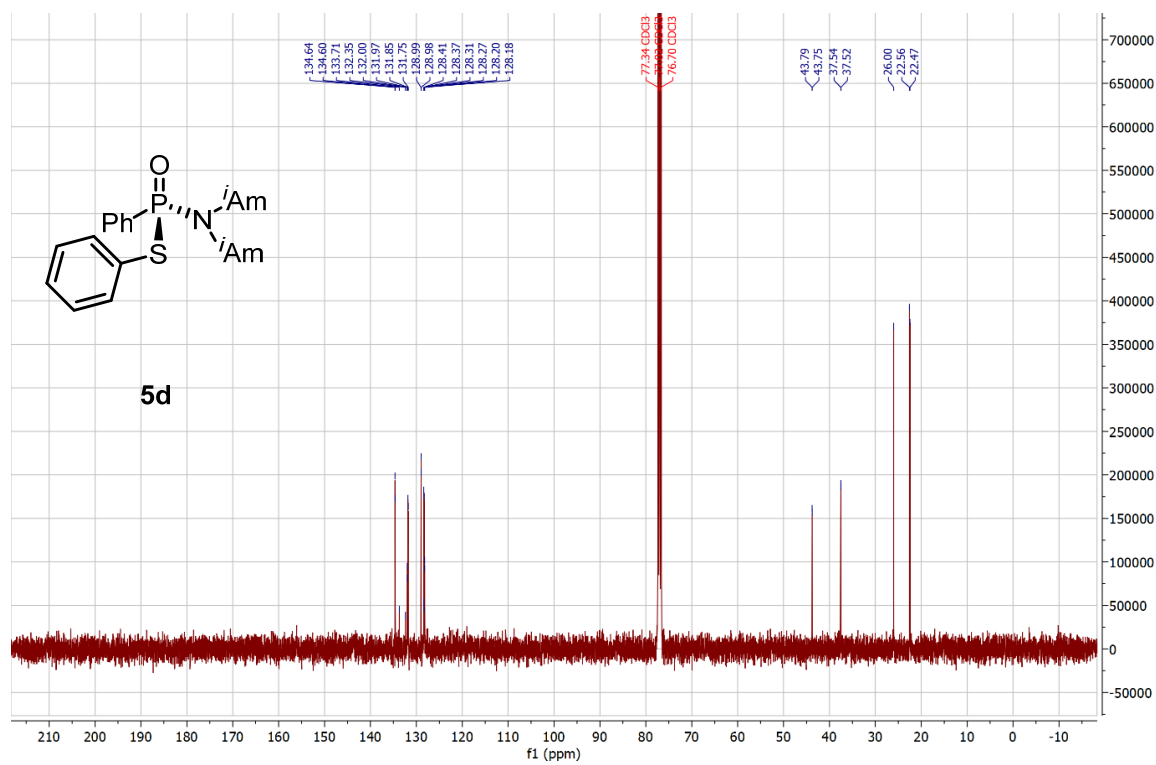

$^{31}\text{P}$  NMR

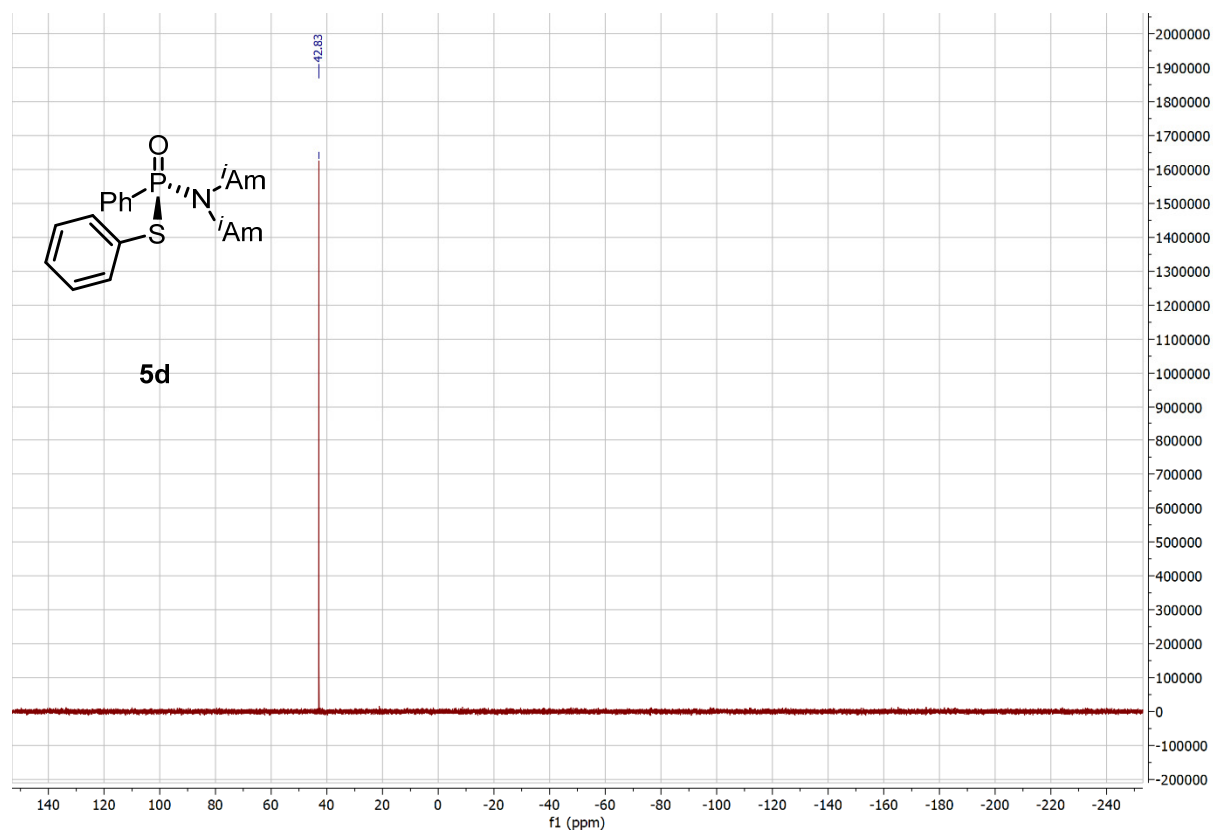

# $^1\text{H}$ NMR

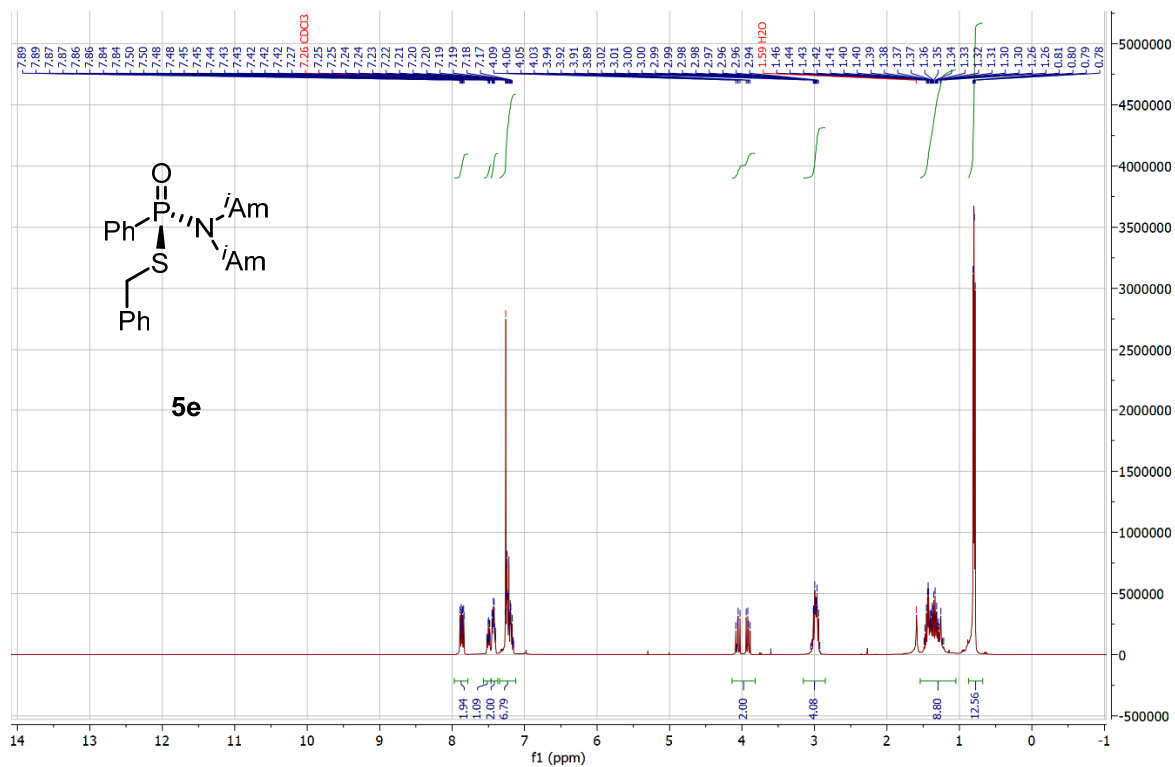

# $^{13}\text{C}$ NMR

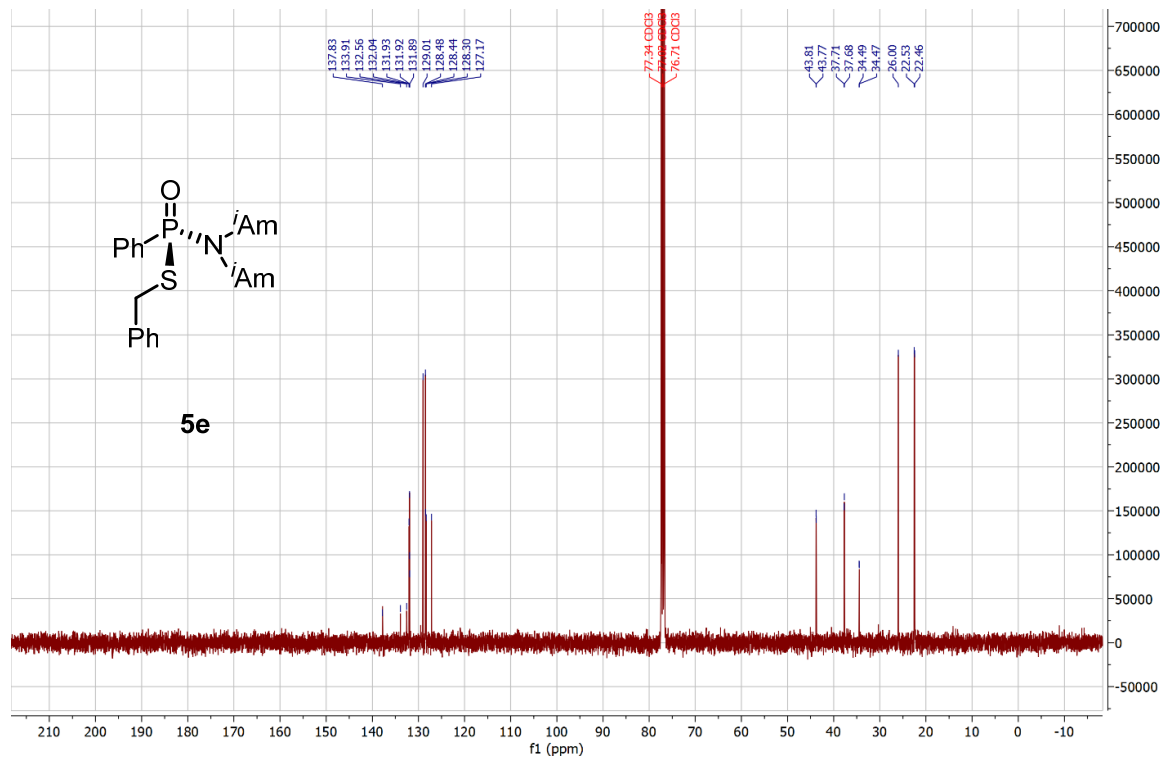



$^{31}\text{P}$  NMR

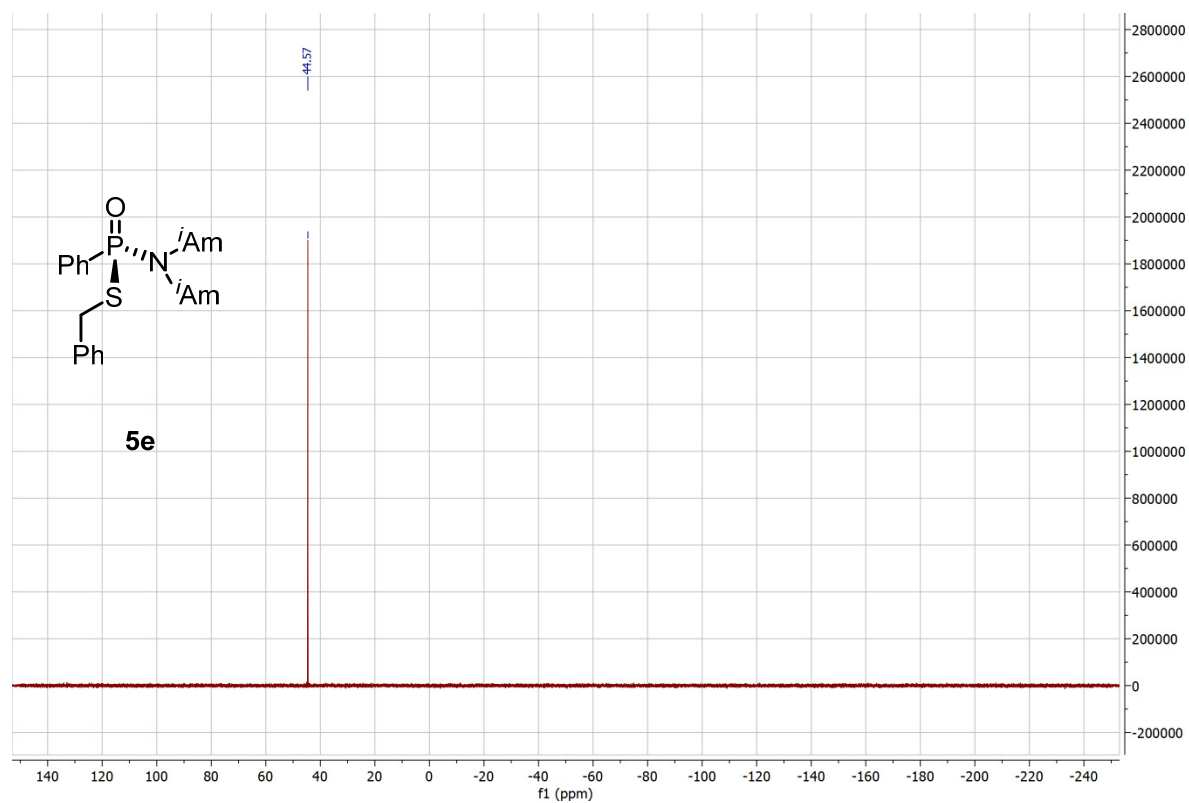

# <sup>1</sup>H NMR

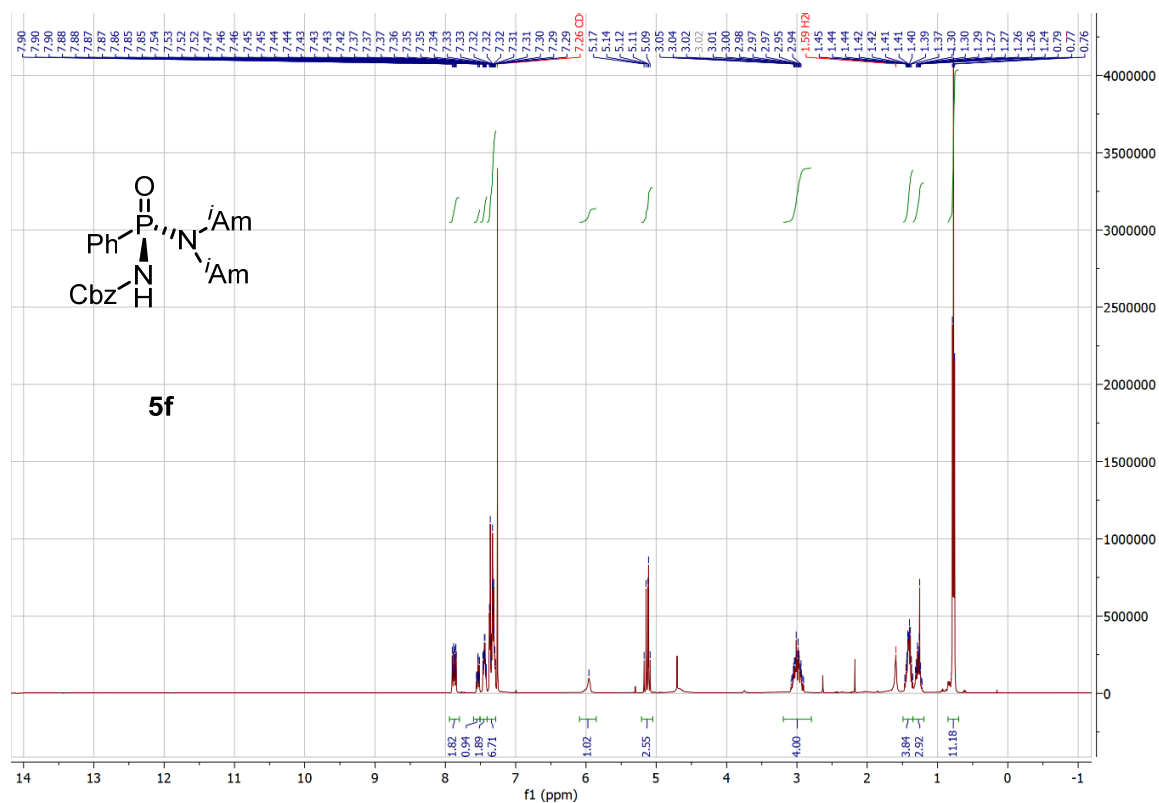

# <sup>13</sup>C NMR

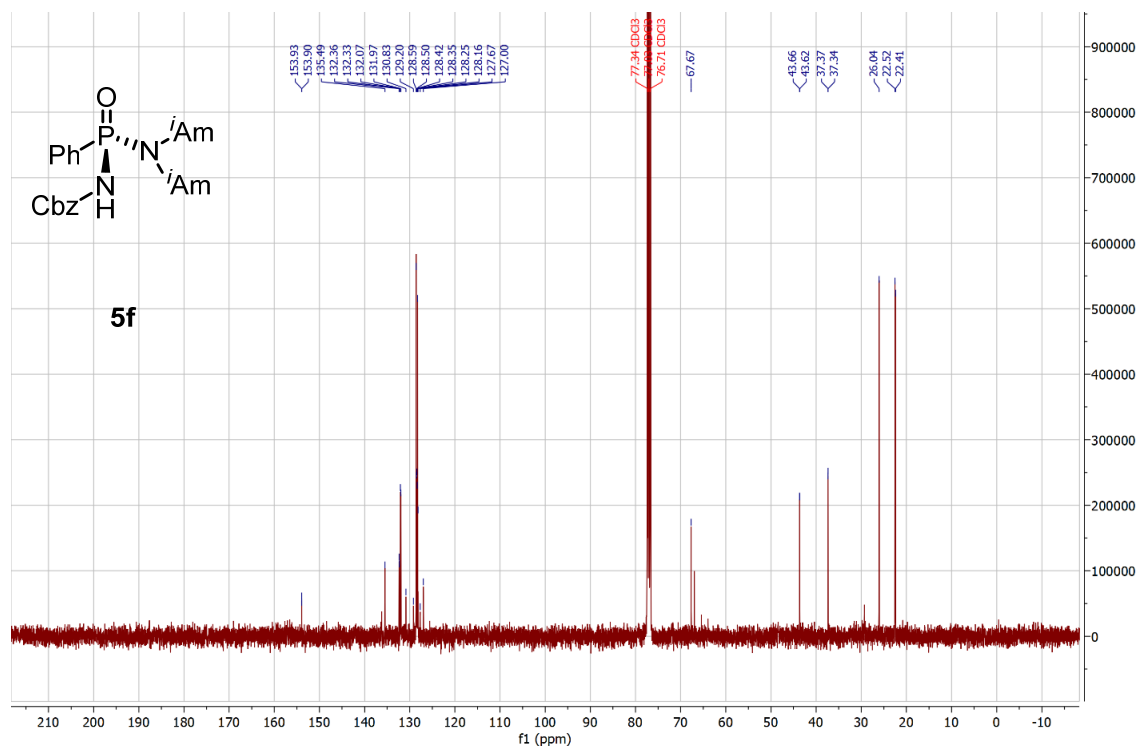

$^{31}\text{P}$  NMR

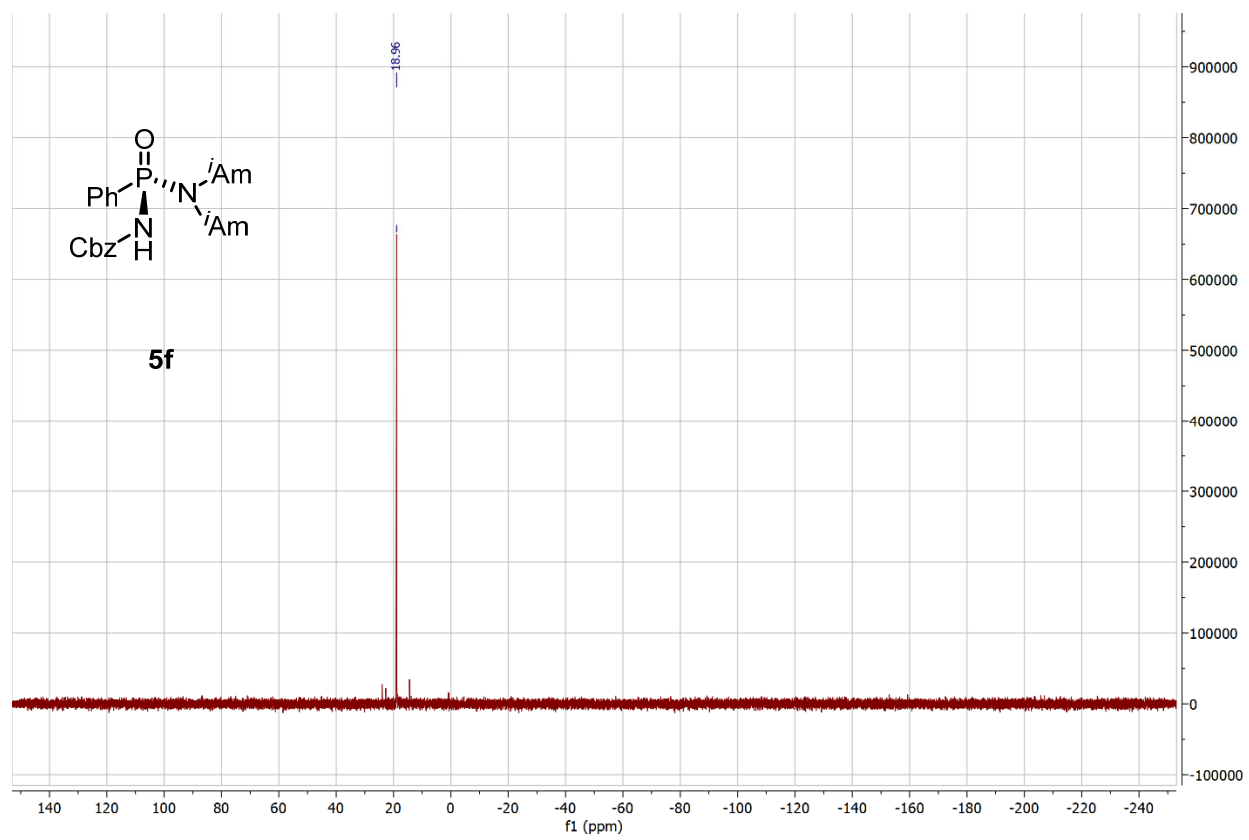

# <sup>1</sup>H NMR

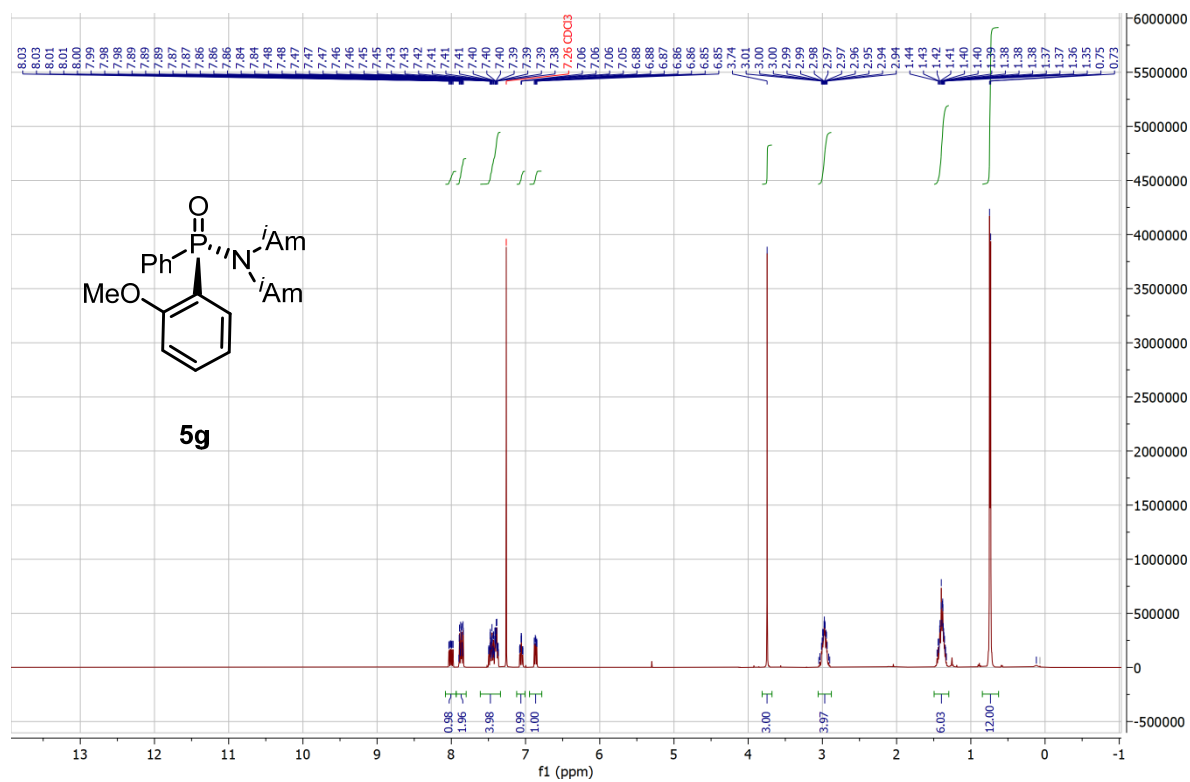

# <sup>13</sup>C NMR

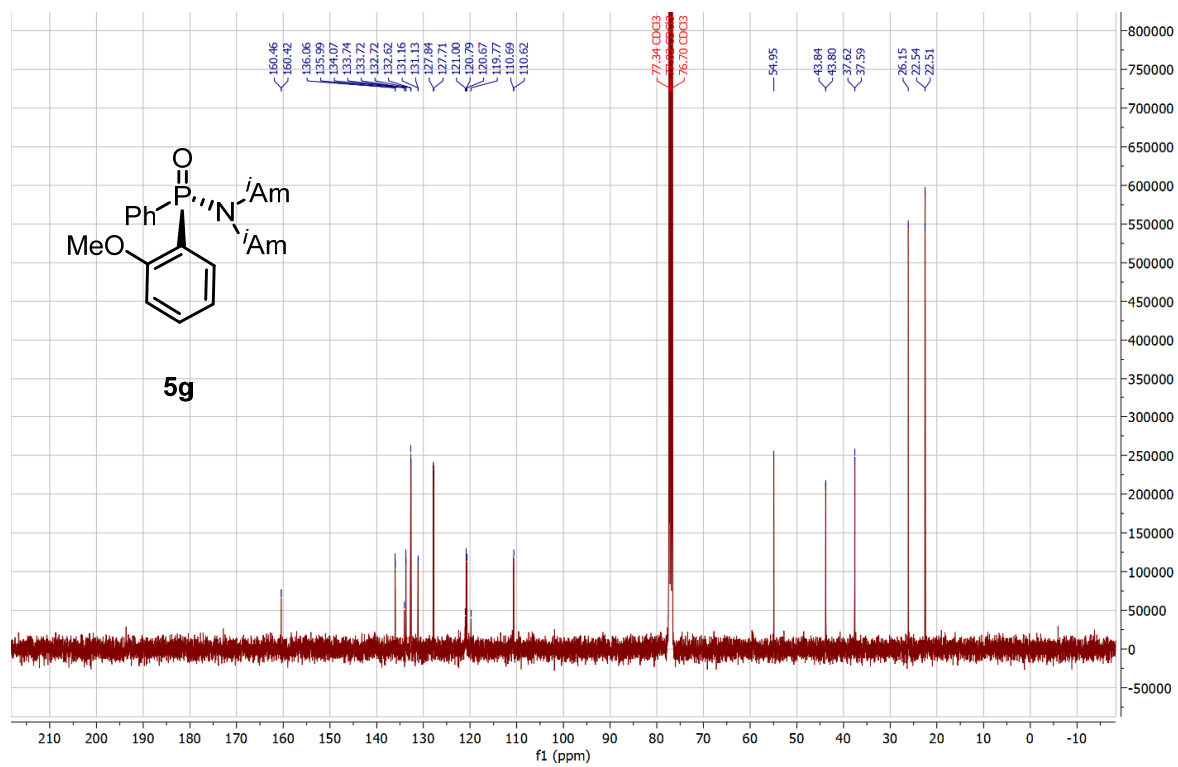

$^{31}\text{P}$  NMR

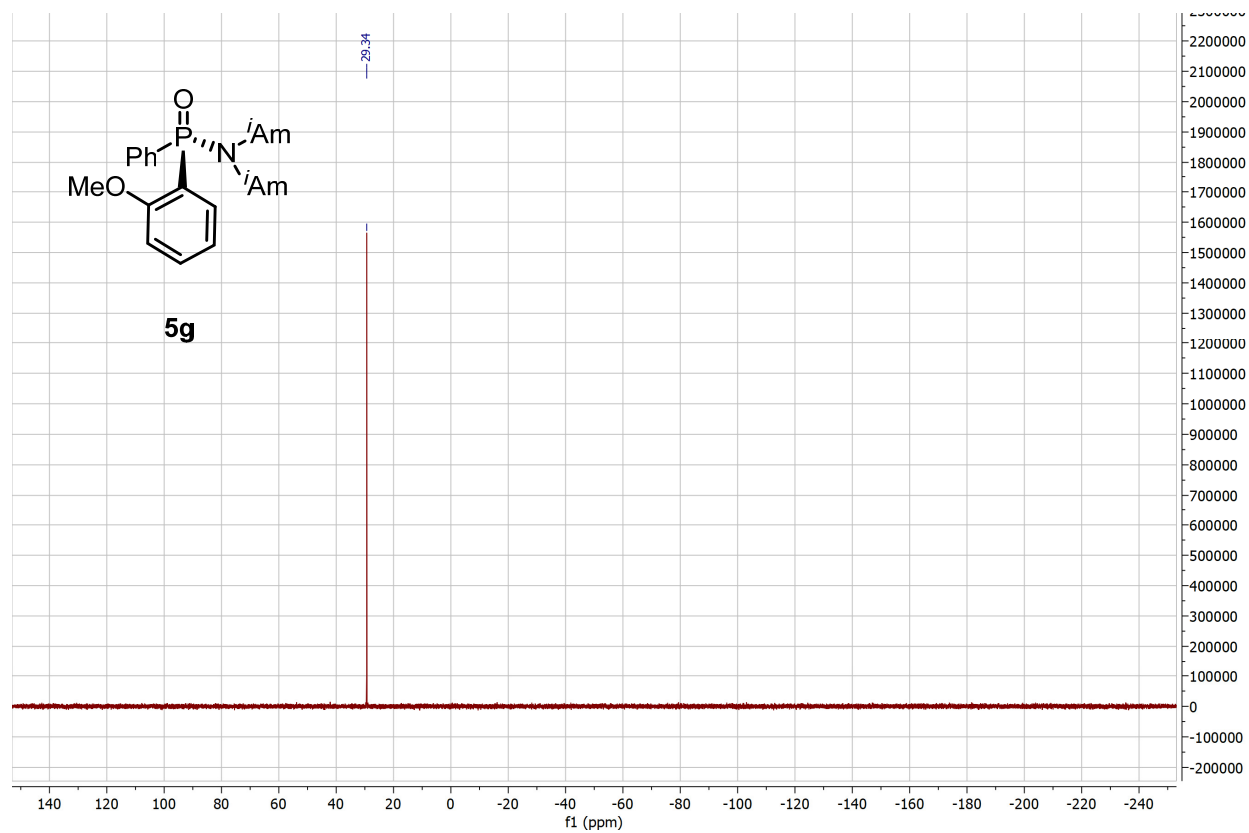

# <sup>1</sup>H NMR

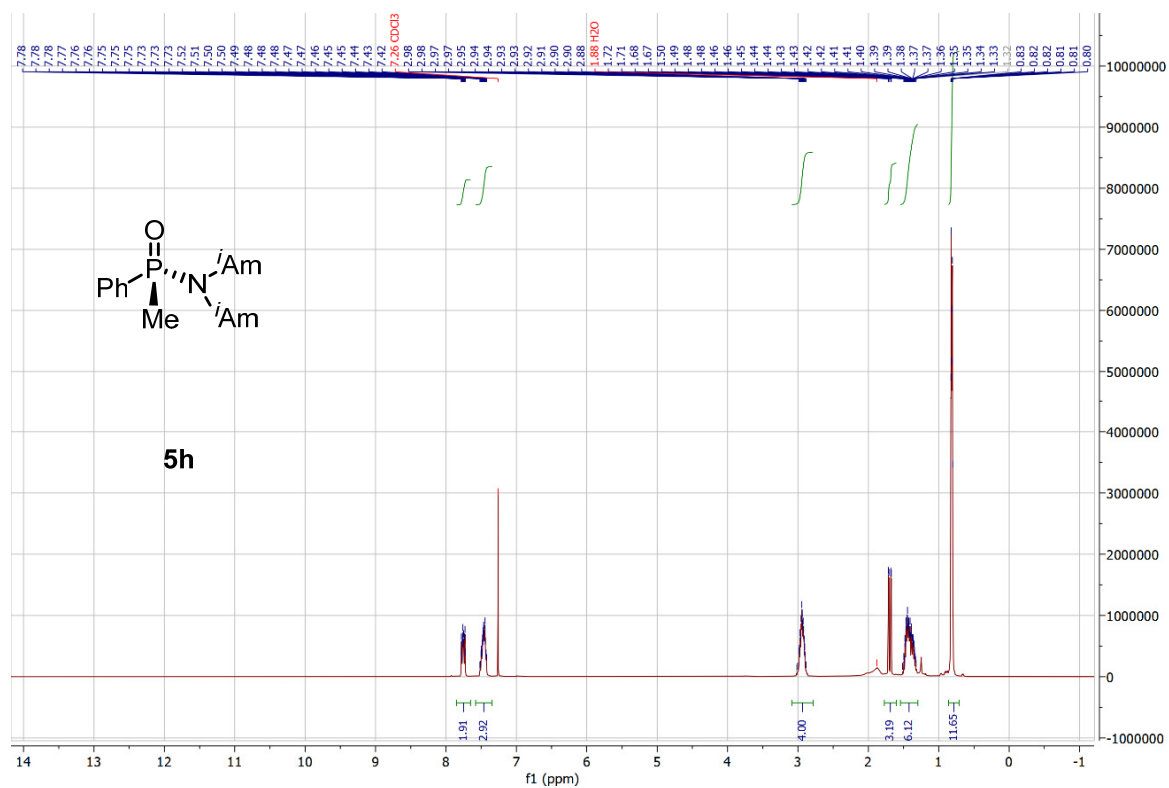

# <sup>13</sup>C NMR

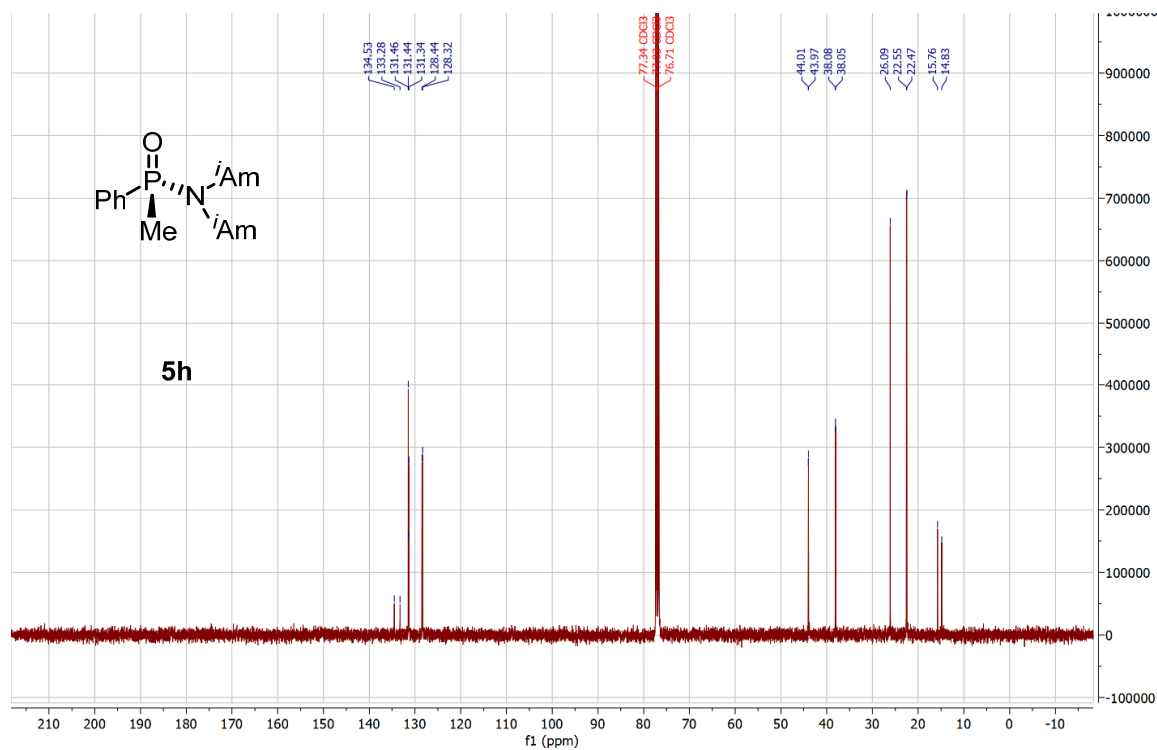

<sup>31</sup>P NMR

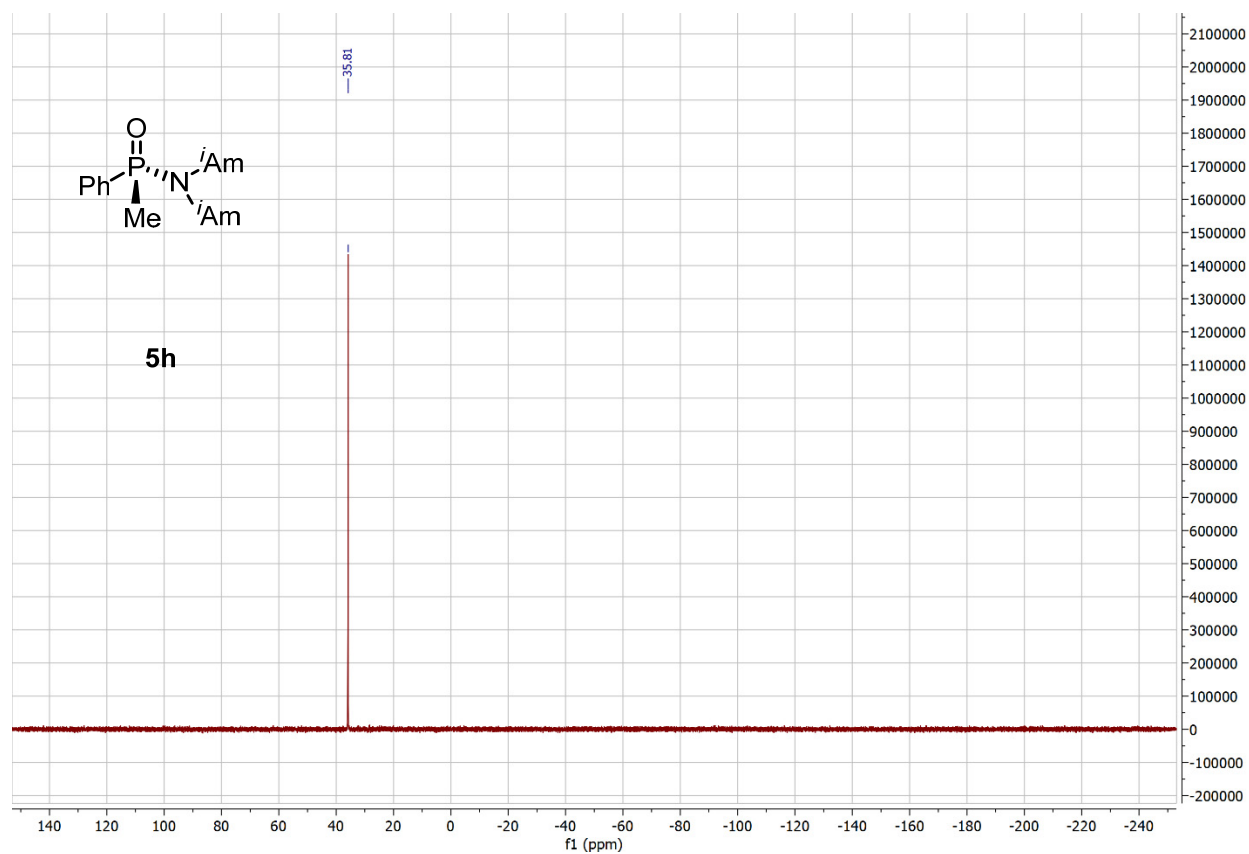

# <sup>1</sup>H NMR

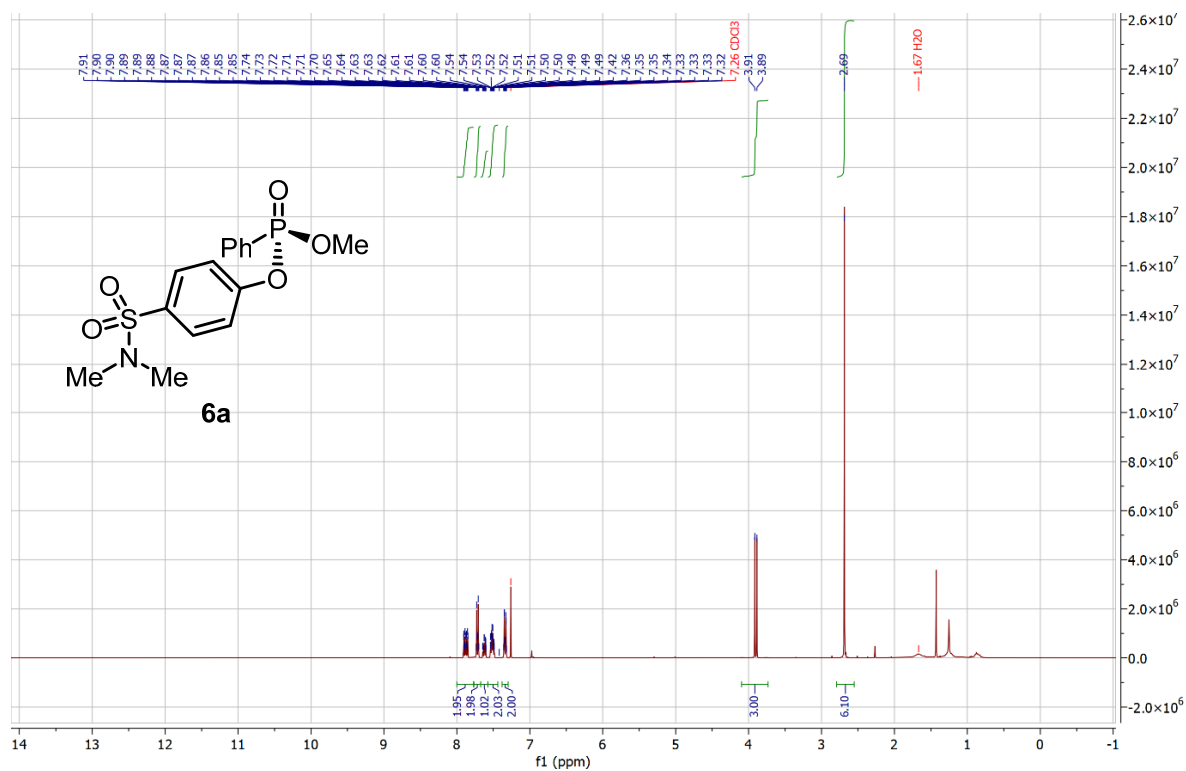

# <sup>13</sup>C NMR

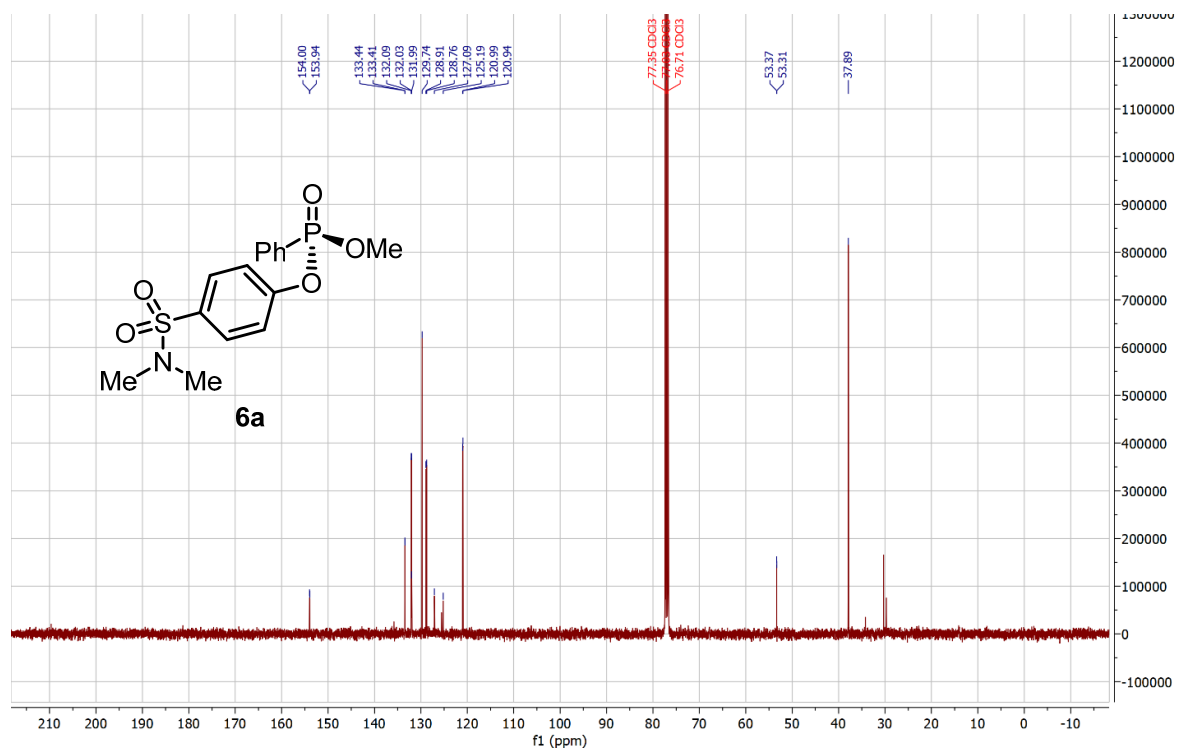



<sup>31</sup>P NMR

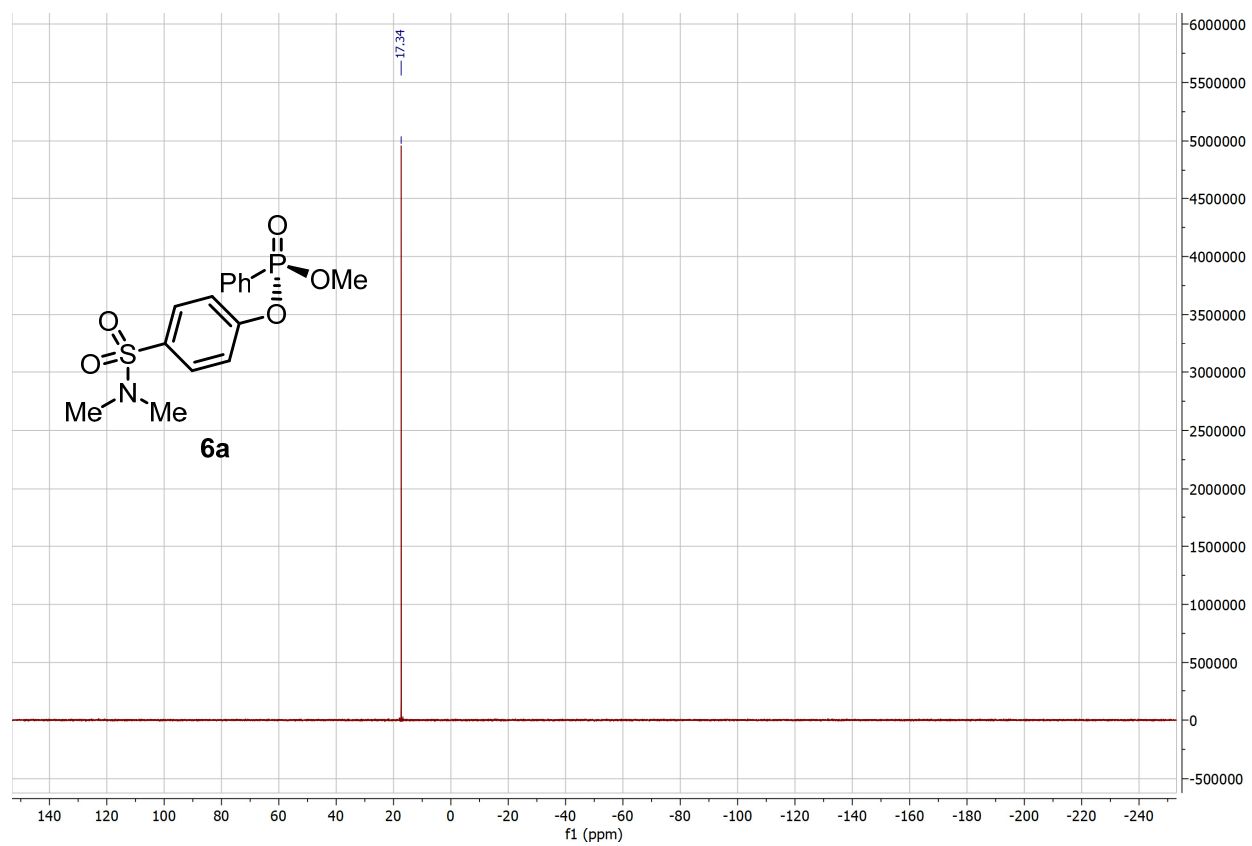

# <sup>1</sup>H NMR

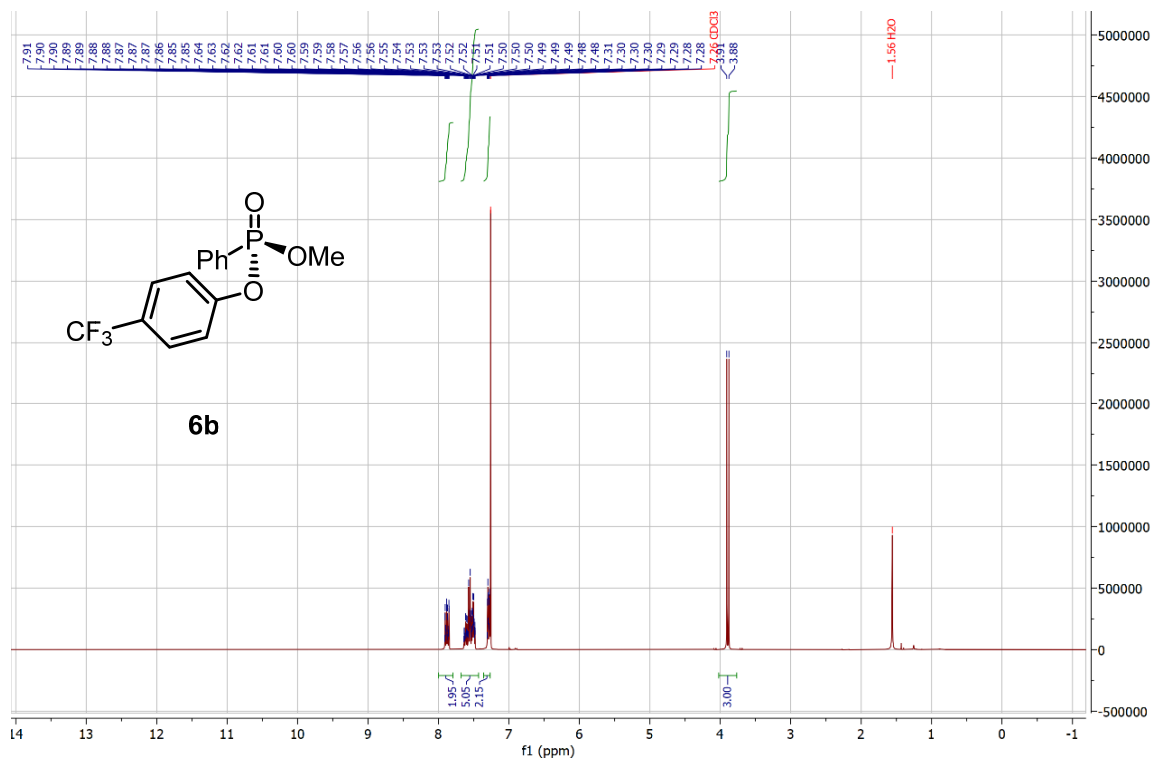

# <sup>13</sup>C NMR

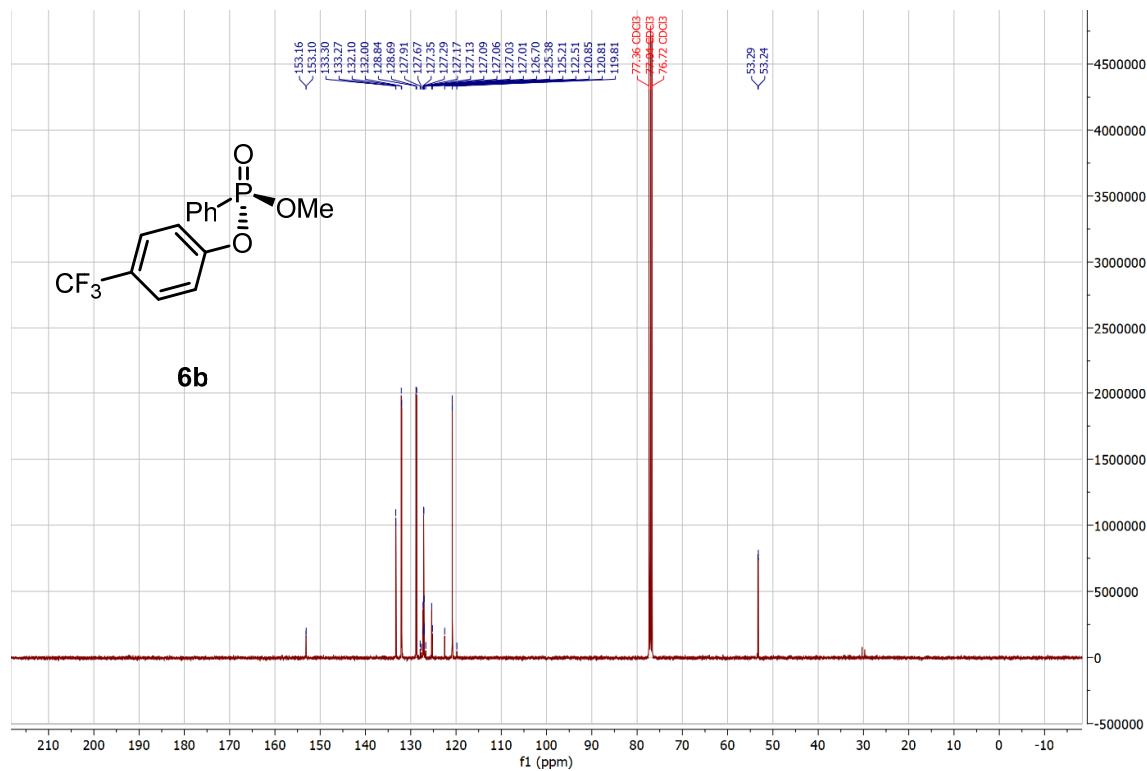

<sup>19</sup>F NMR

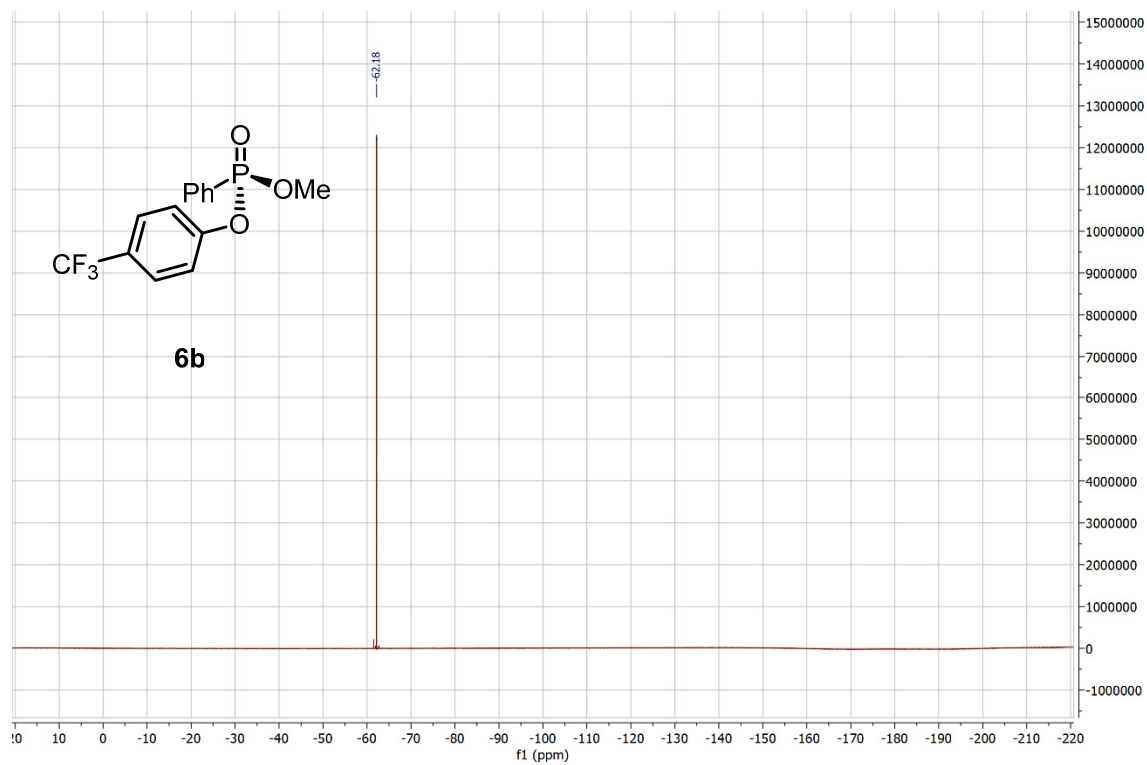

<sup>31</sup>P NMR

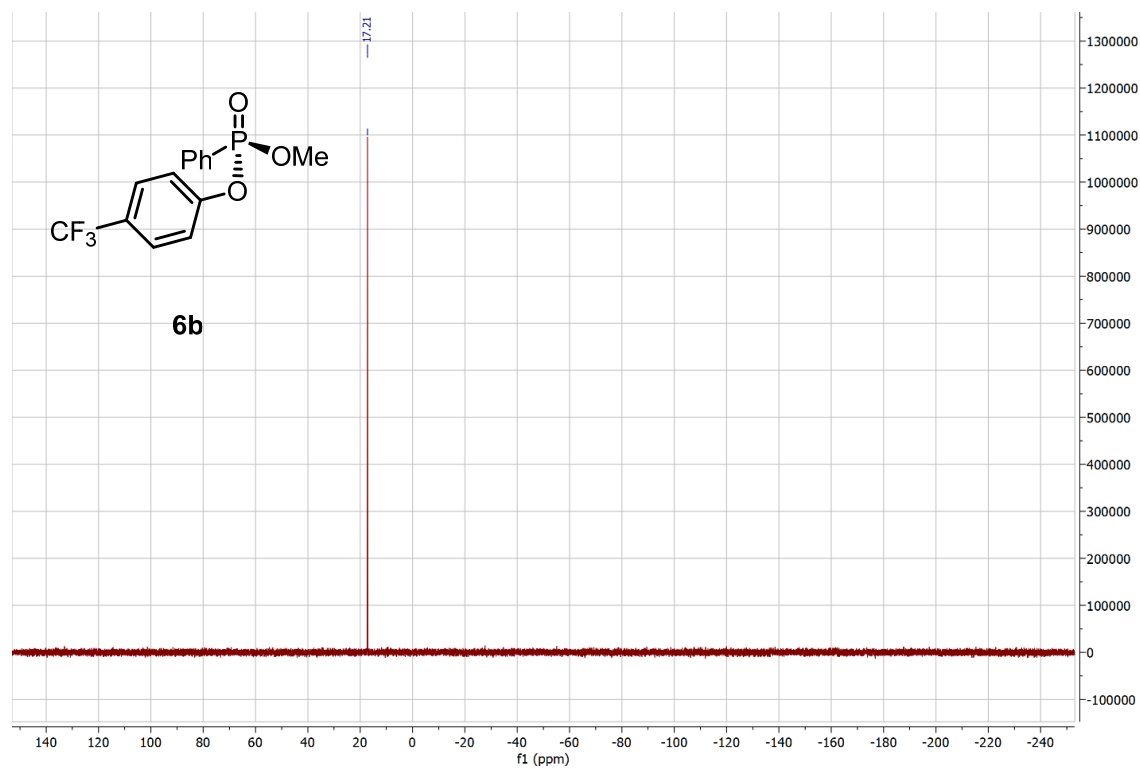

<sup>1</sup>H NMR

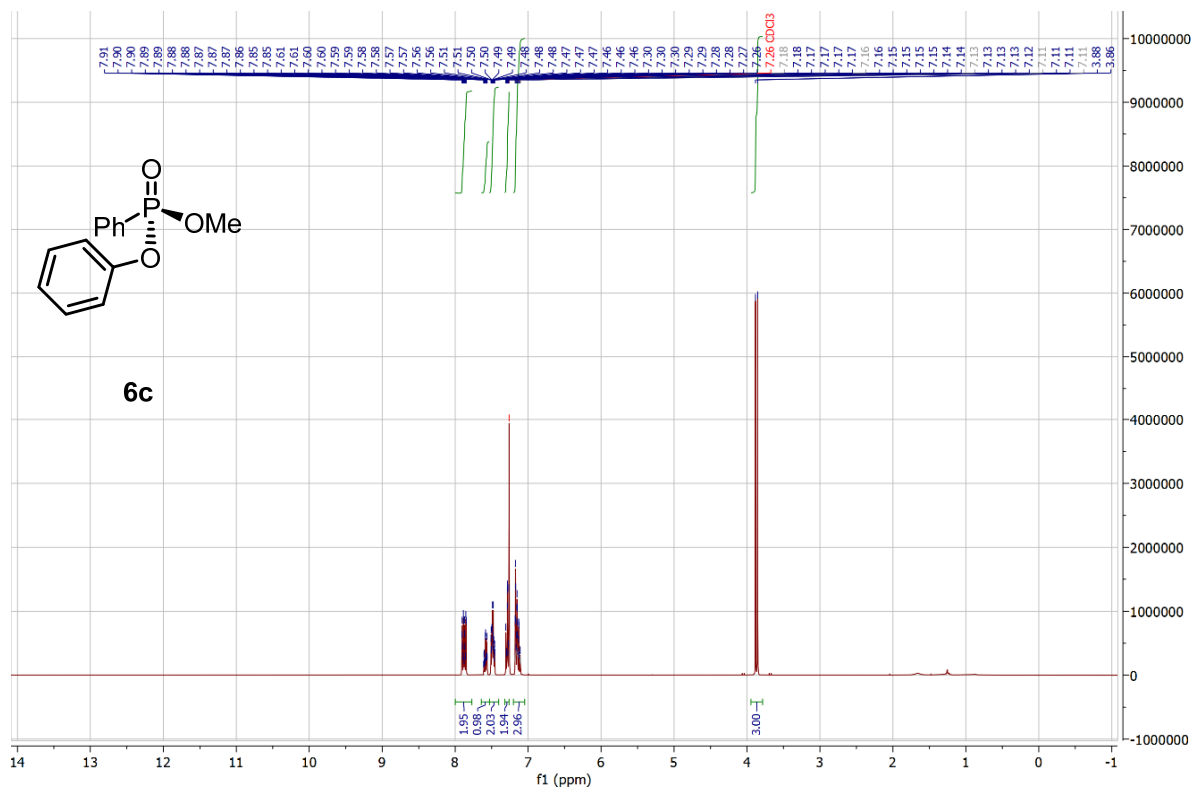

<sup>13</sup>C NMR

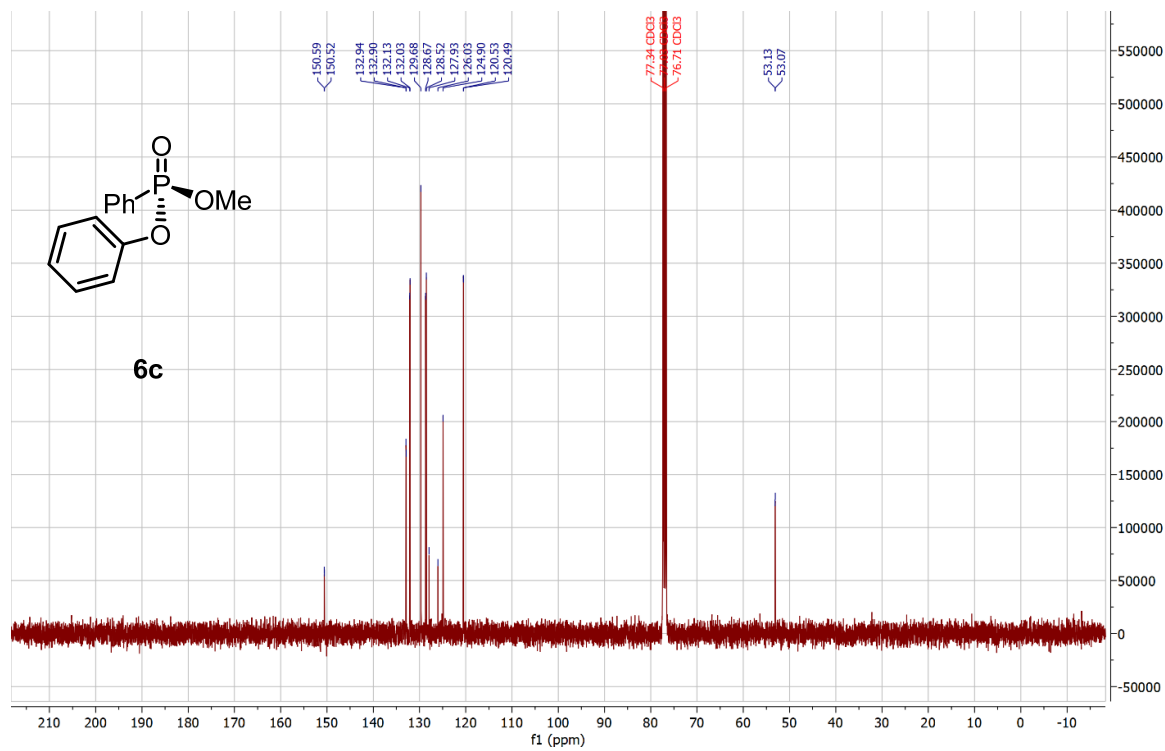

$^{31}\text{P}$  NMR

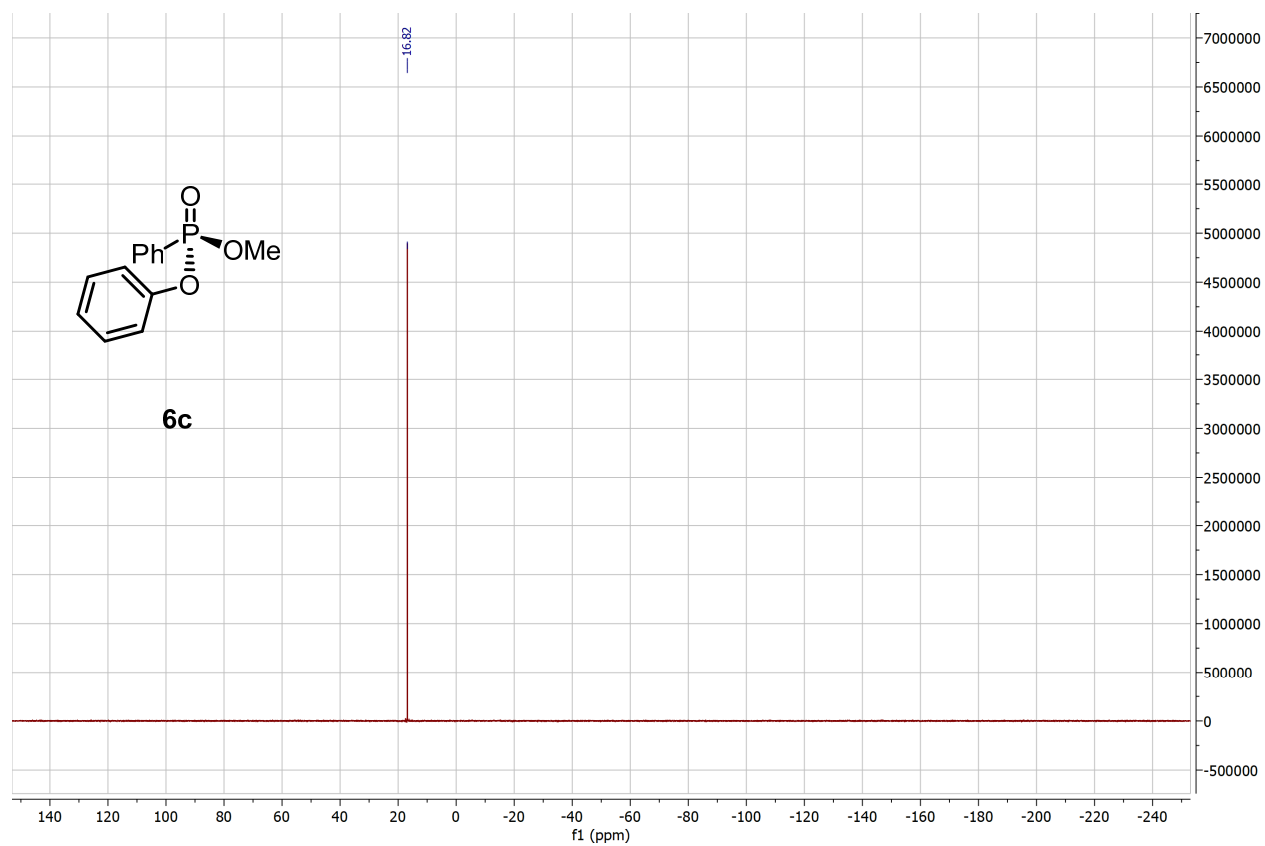

# <sup>1</sup>H NMR

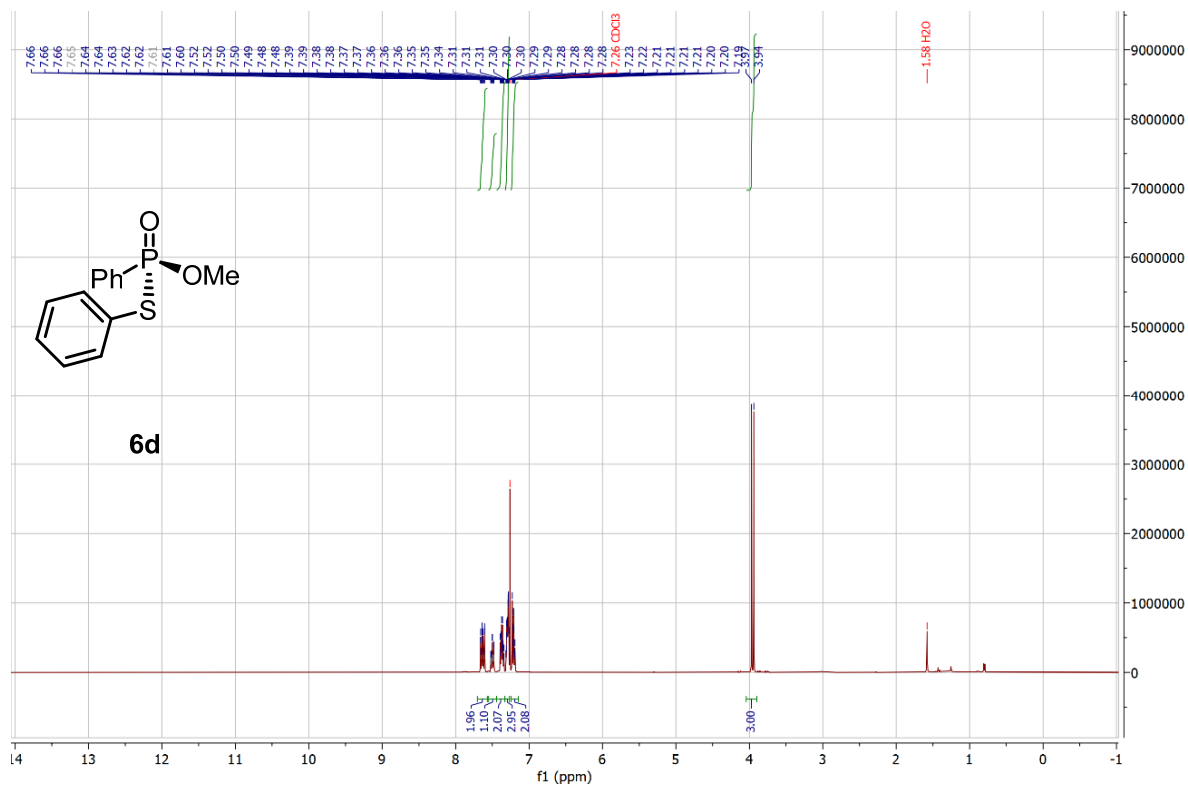

# <sup>13</sup>C NMR

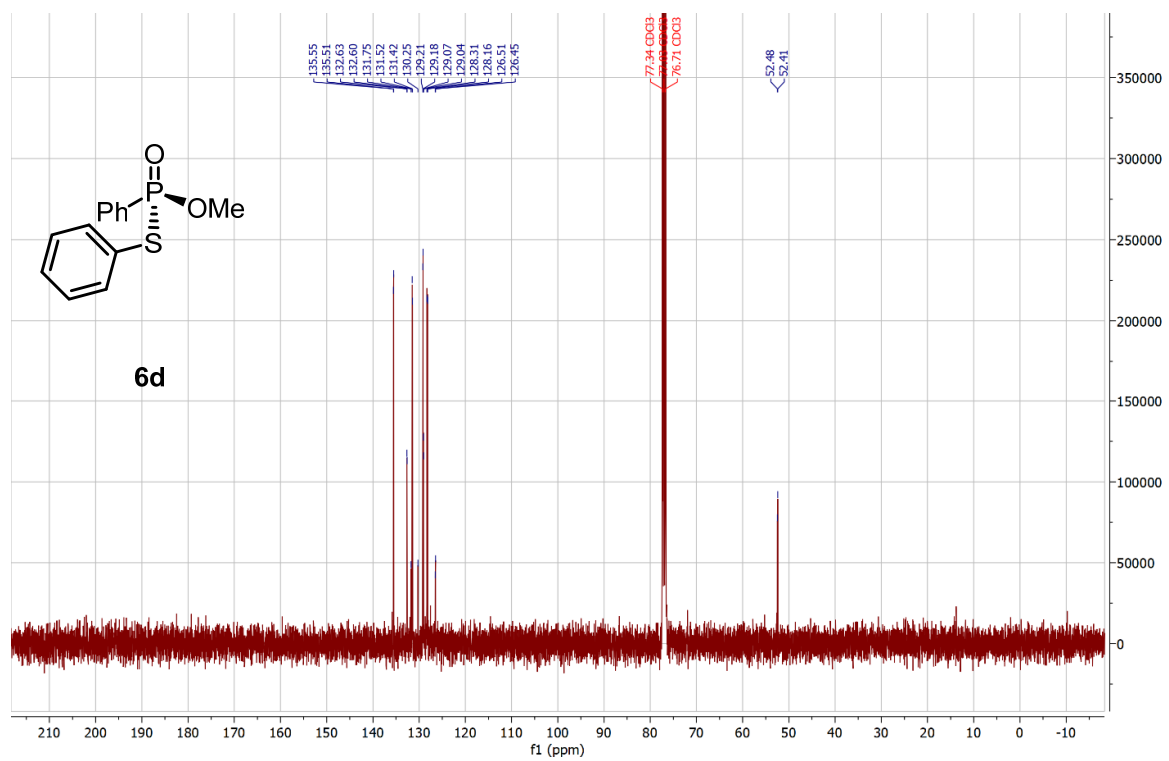

$^{31}\text{P}$  NMR

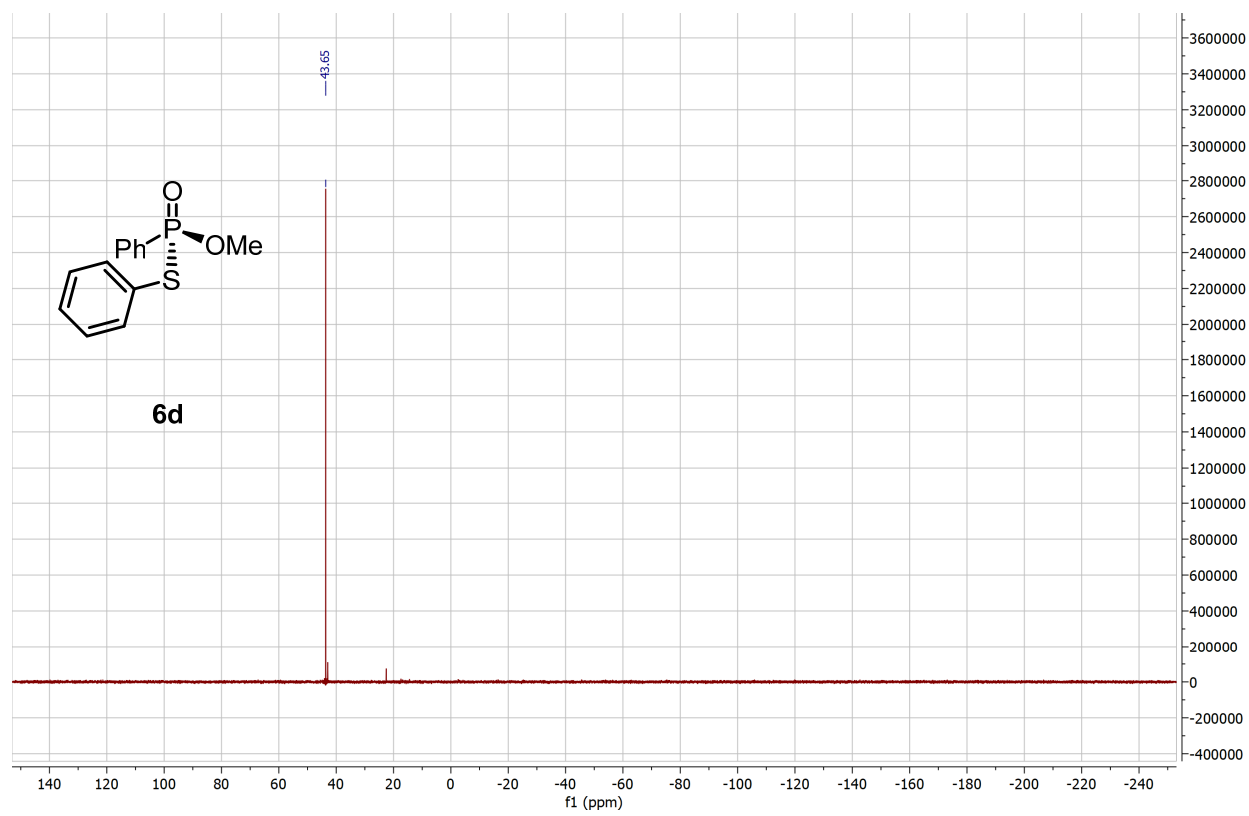

# <sup>1</sup>H NMR

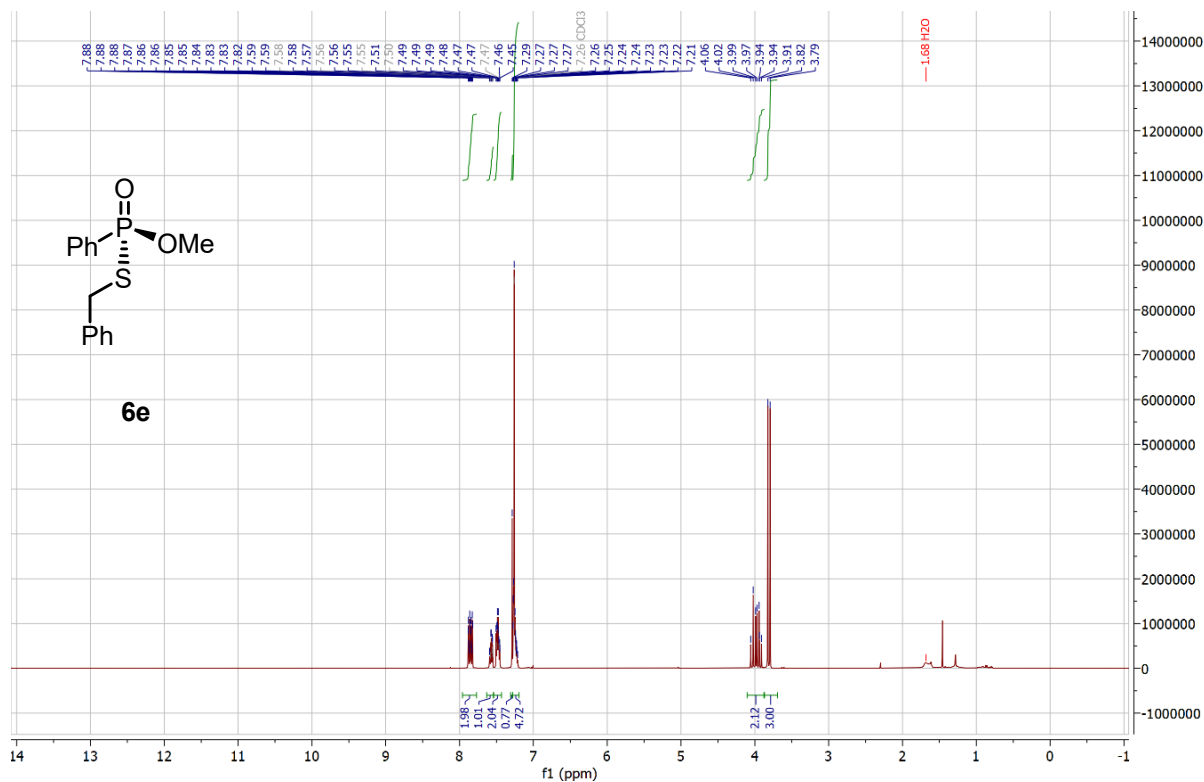

# <sup>13</sup>C NMR

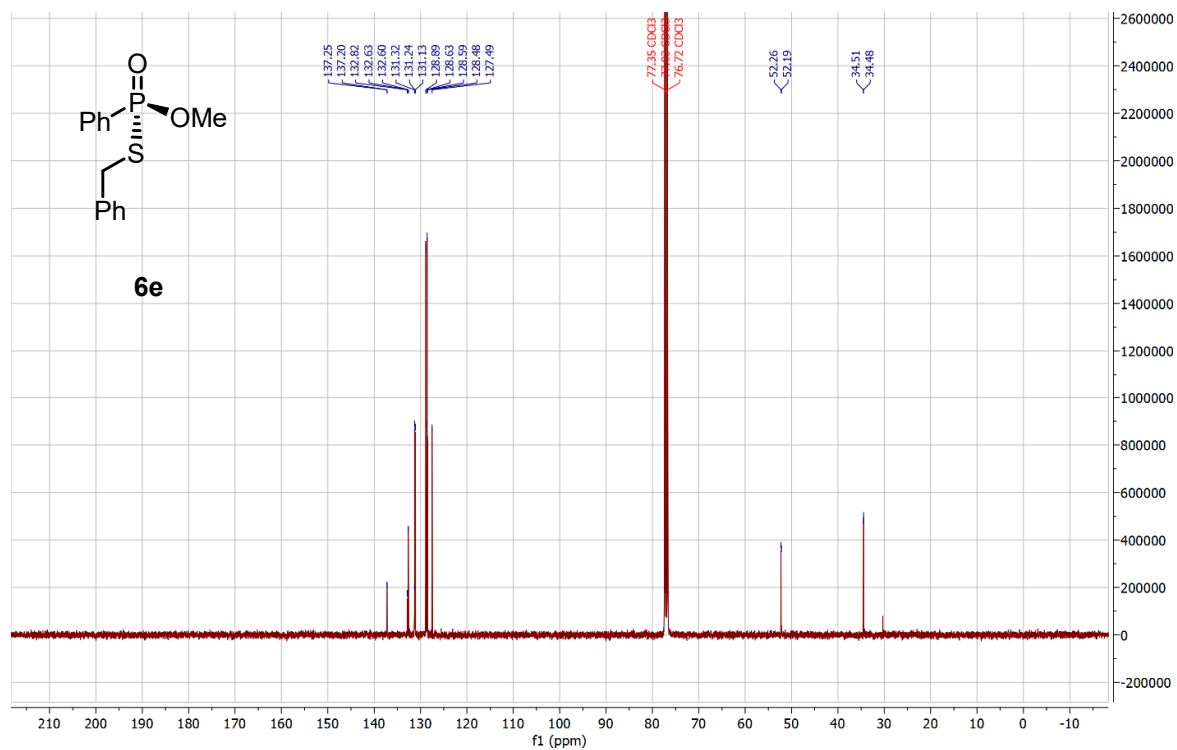



$^{31}\text{P}$  NMR

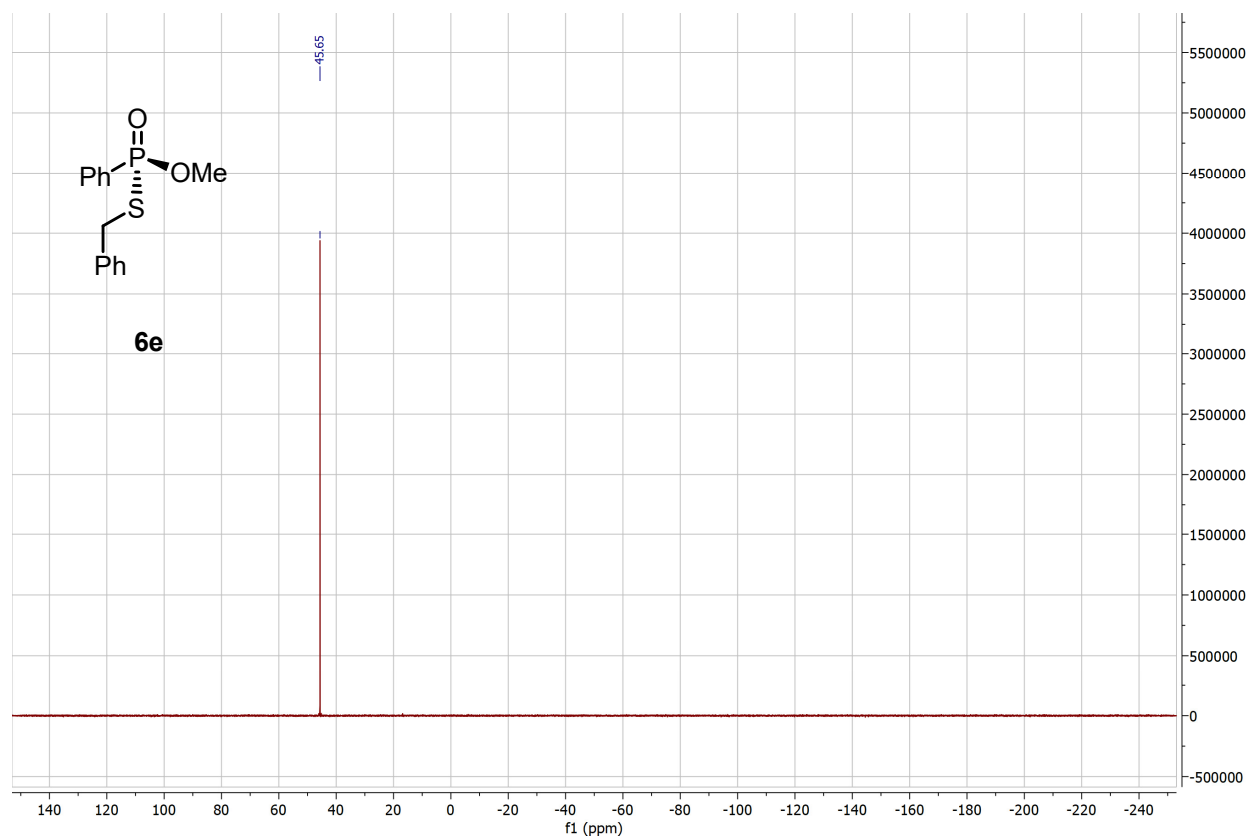



$^{31}\text{P}$  NMR

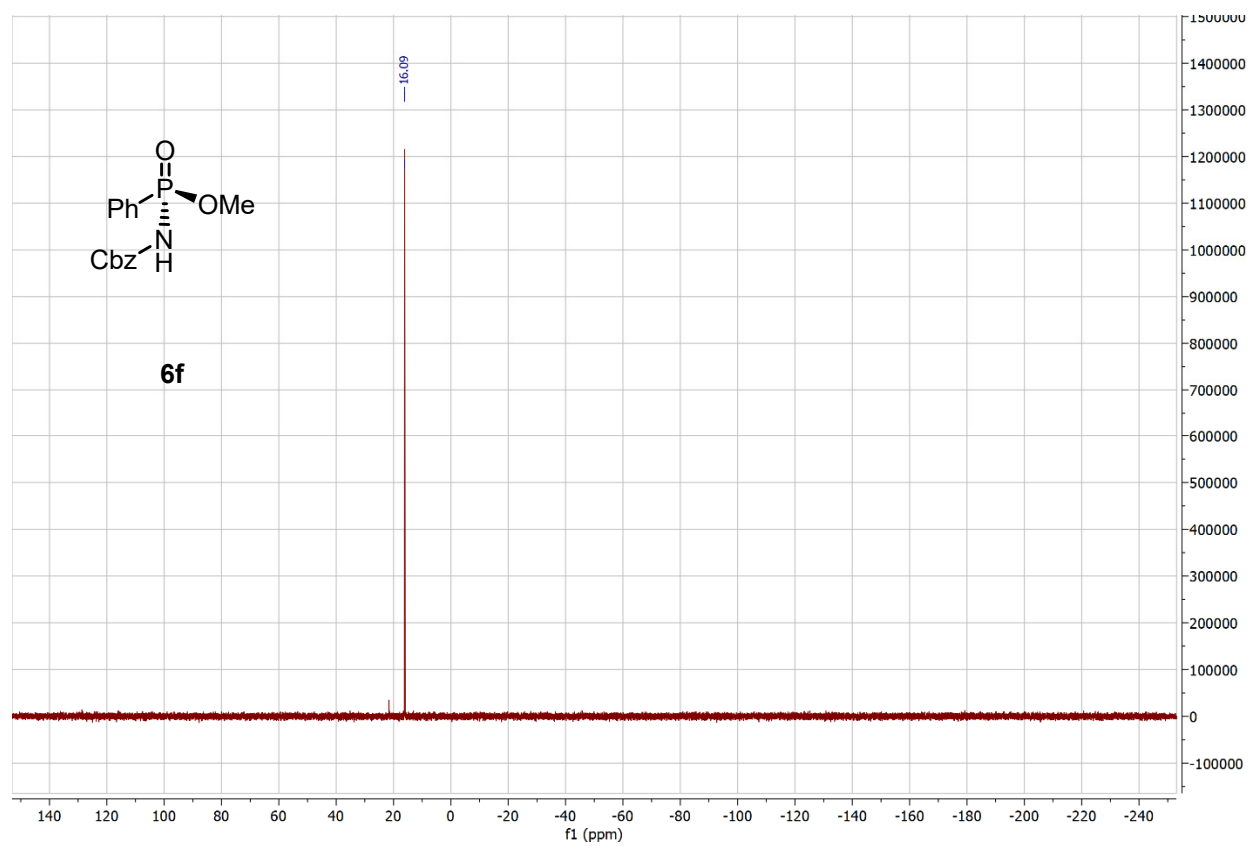

# <sup>1</sup>H NMR

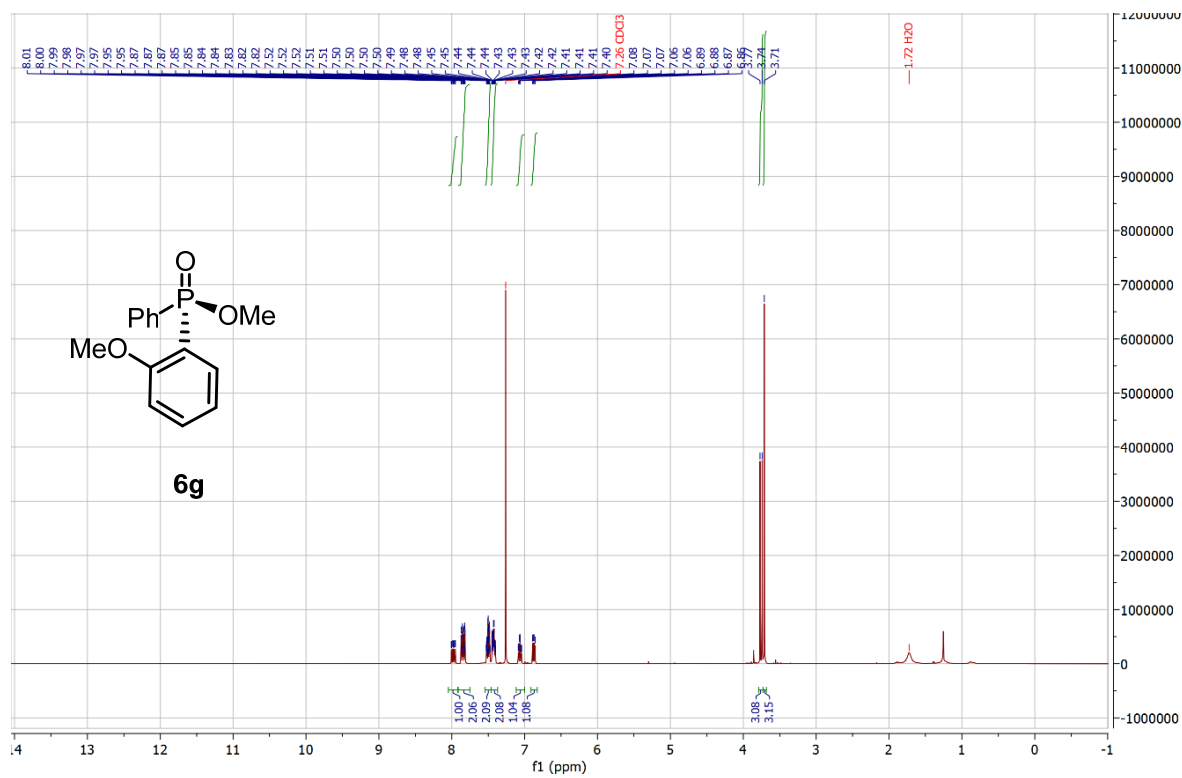

# <sup>13</sup>C NMR

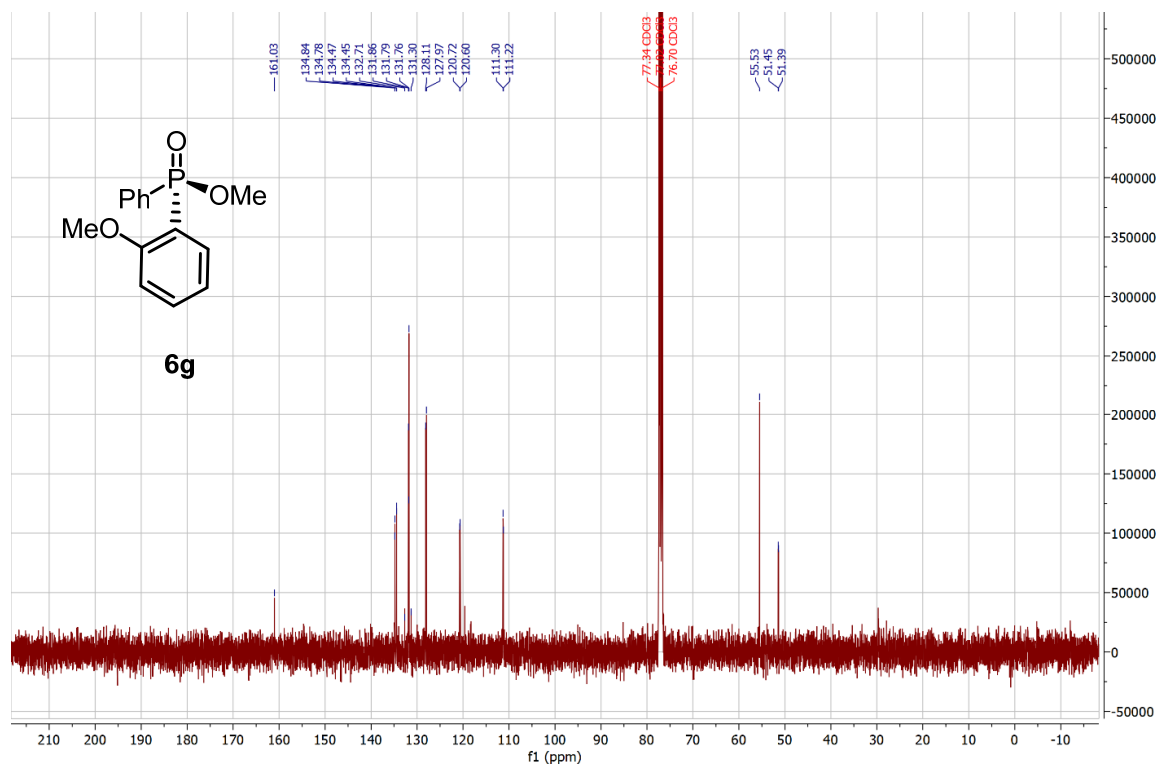

$^{31}\text{P}$  NMR

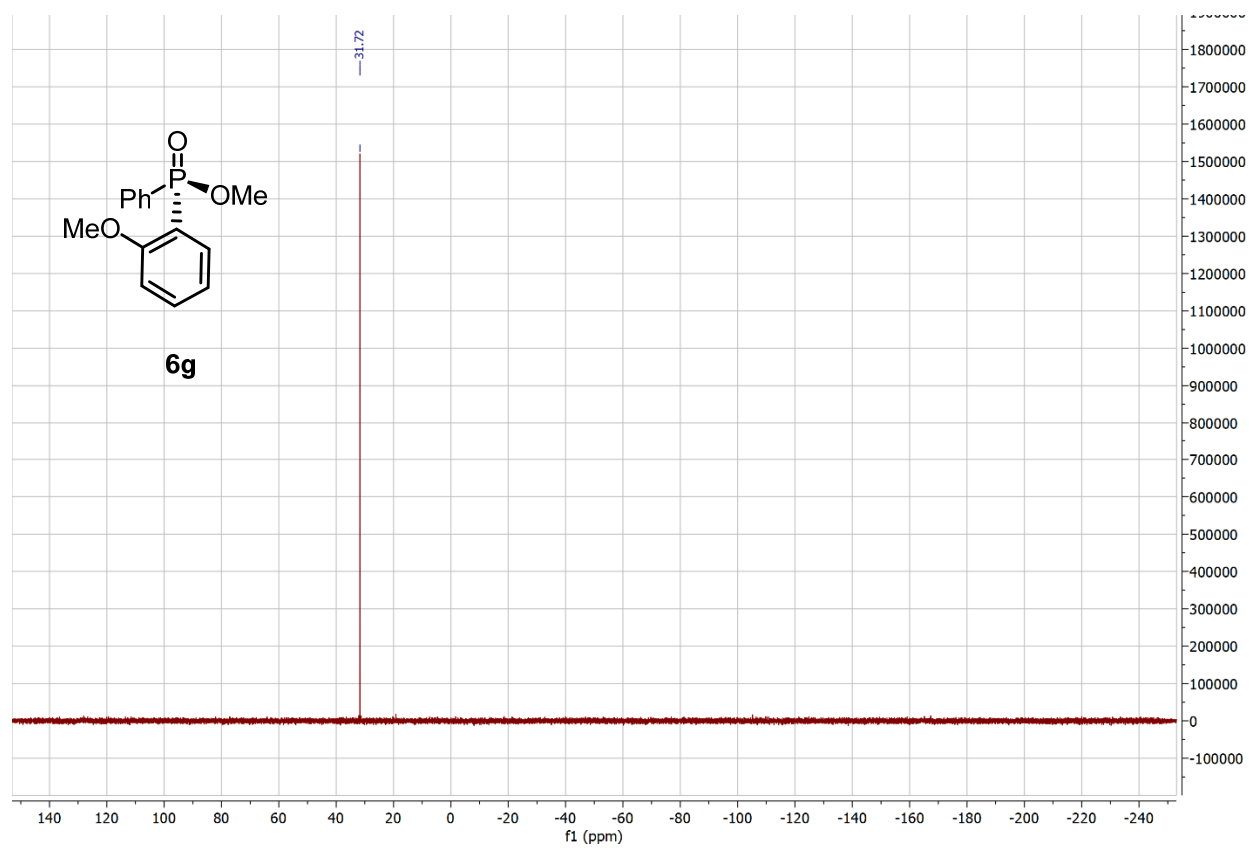

# <sup>1</sup>H NMR

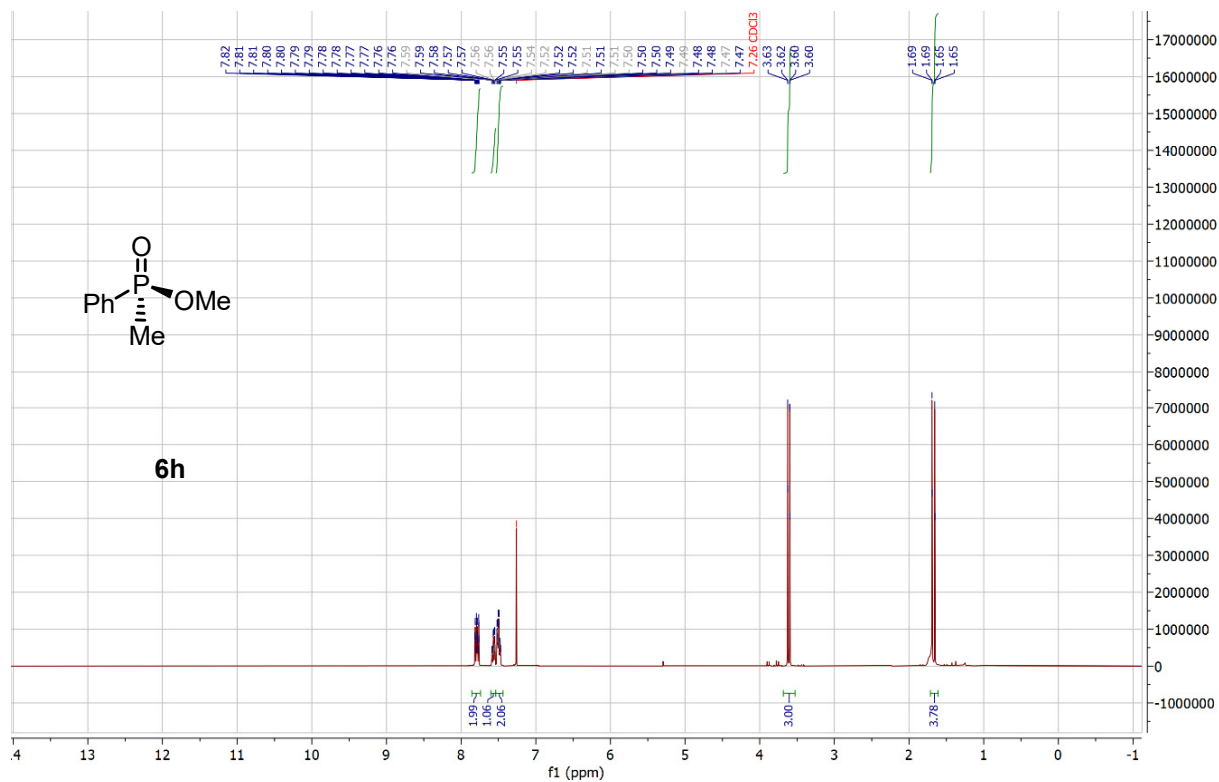

# <sup>13</sup>C NMR

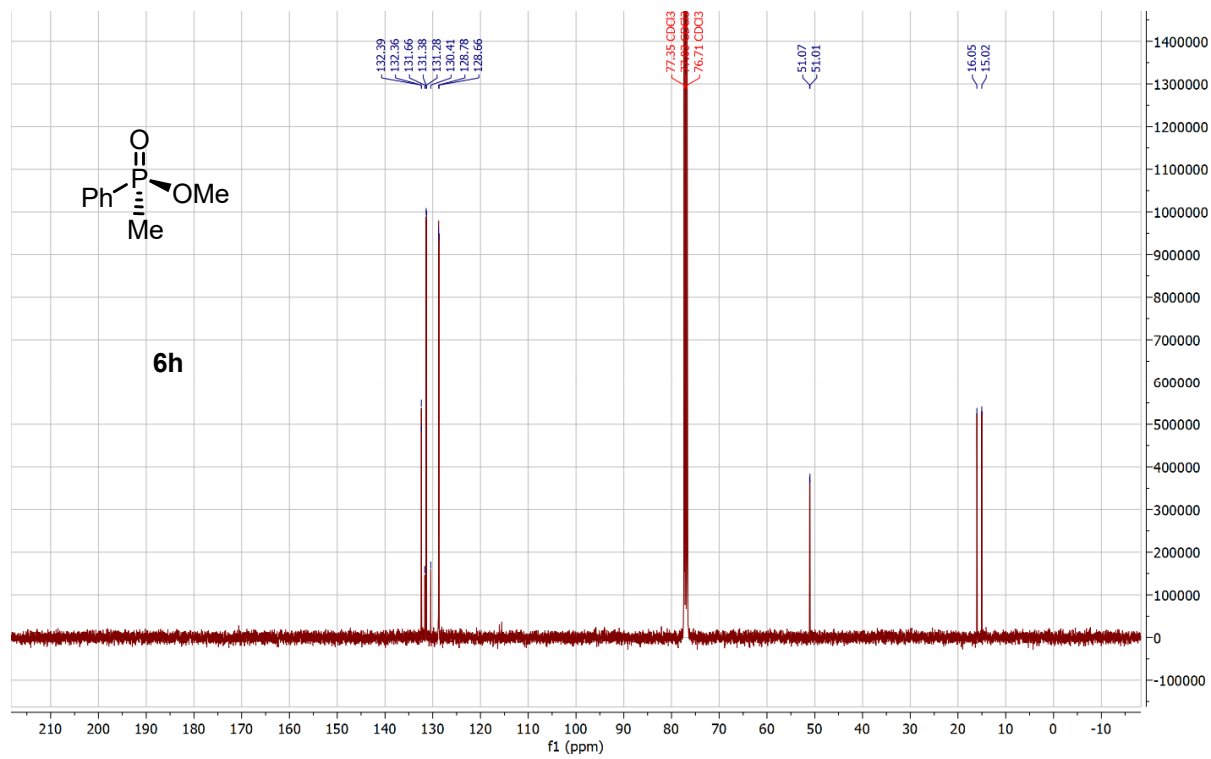

$^{31}\text{P}$  NMR

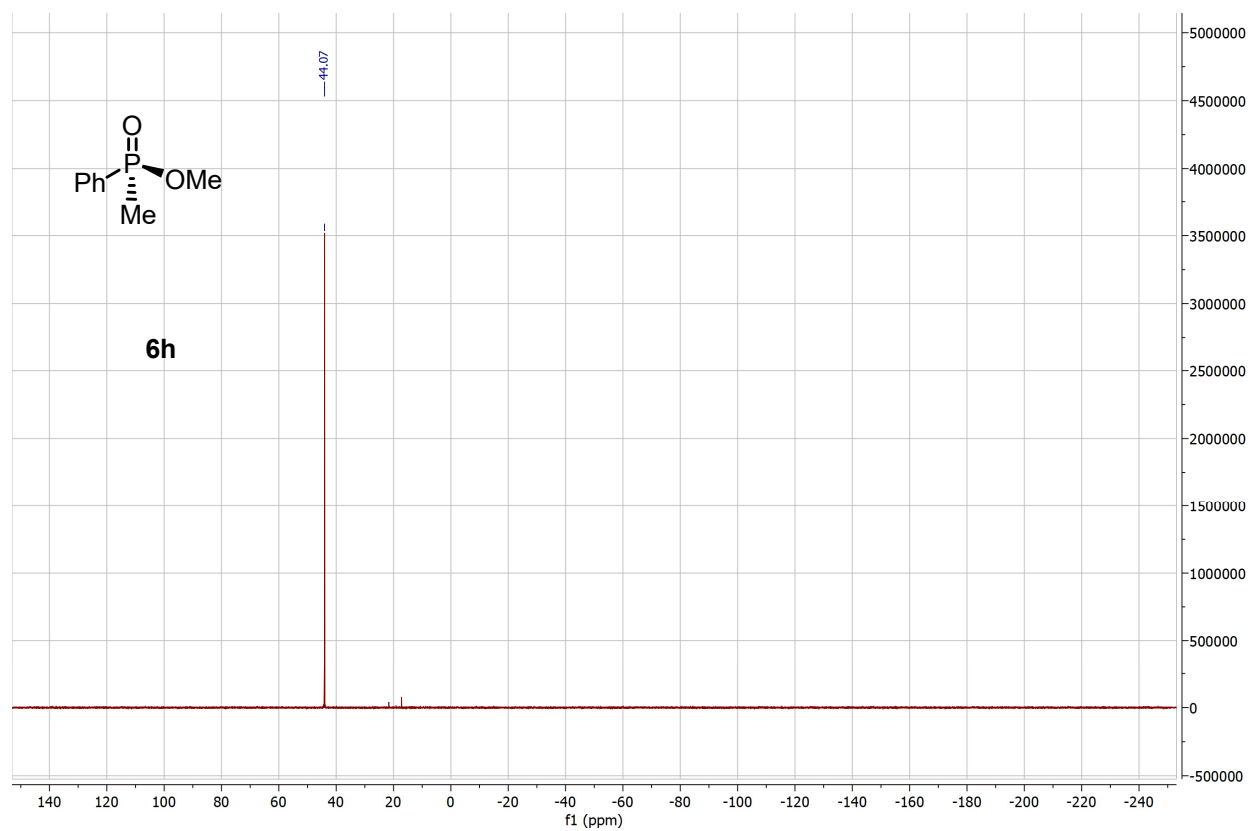

# <sup>1</sup>H NMR

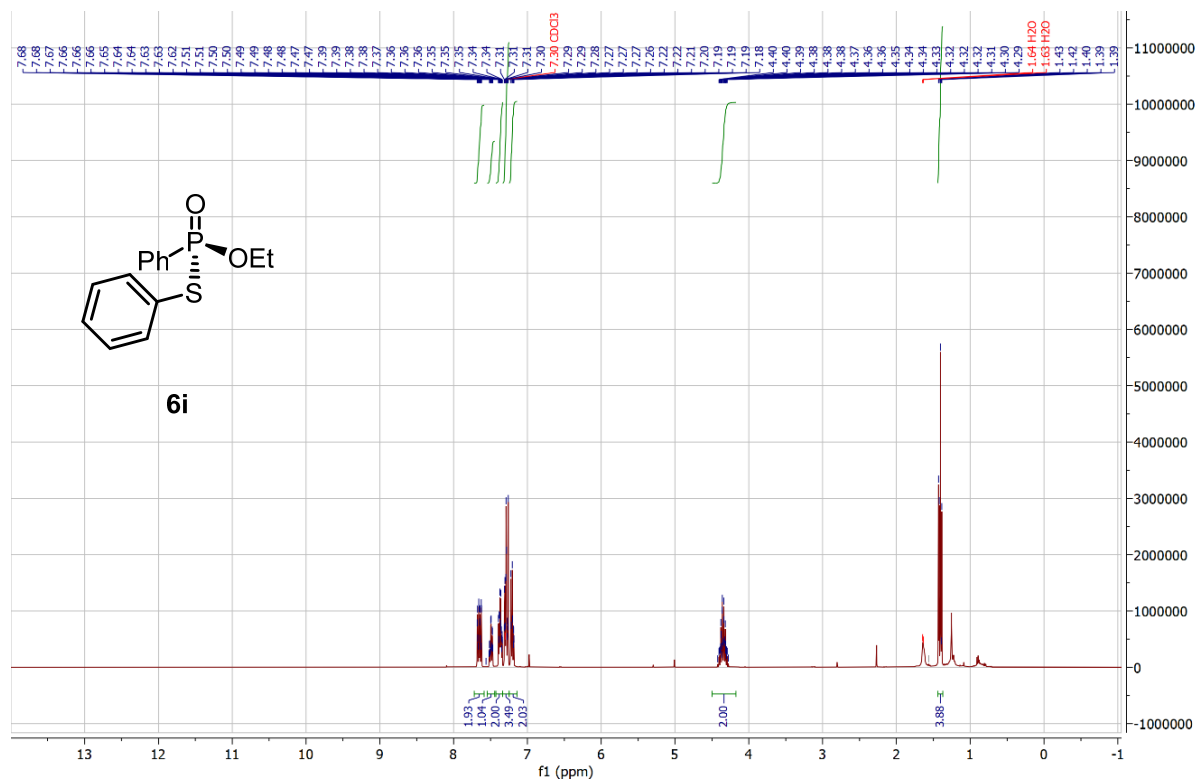

# <sup>13</sup>C NMR

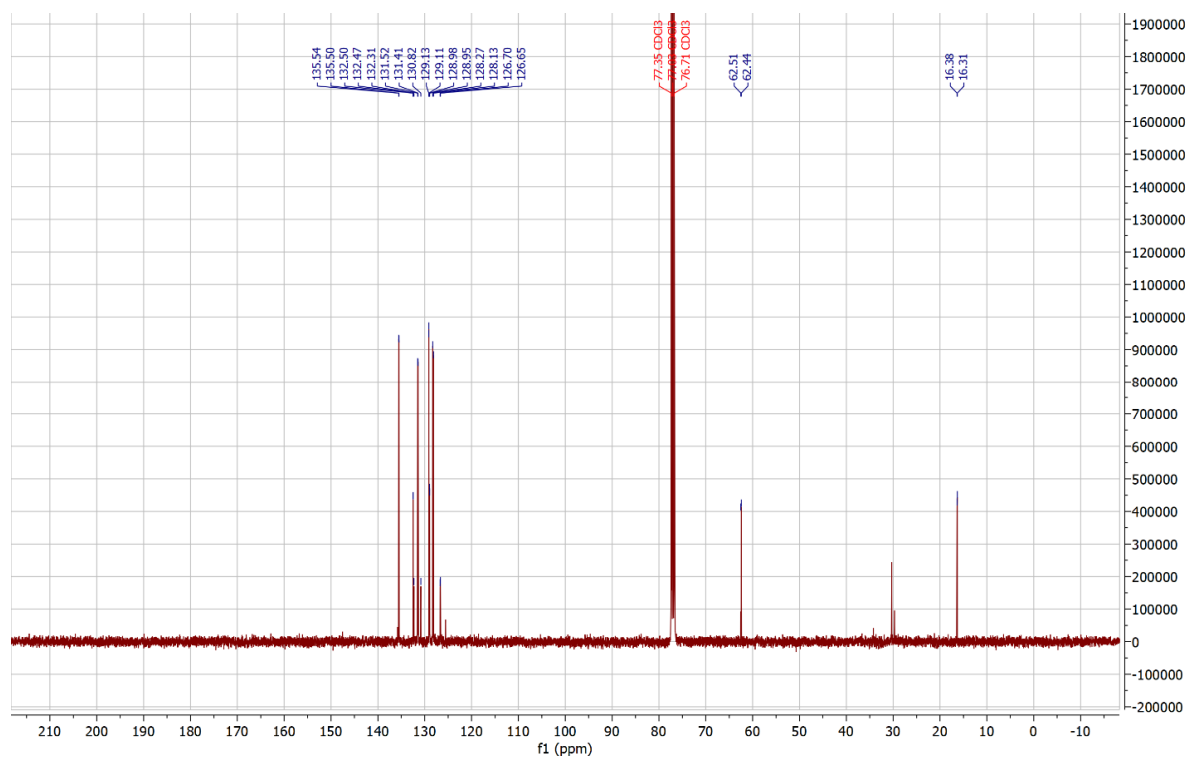



<sup>31</sup>P NMR

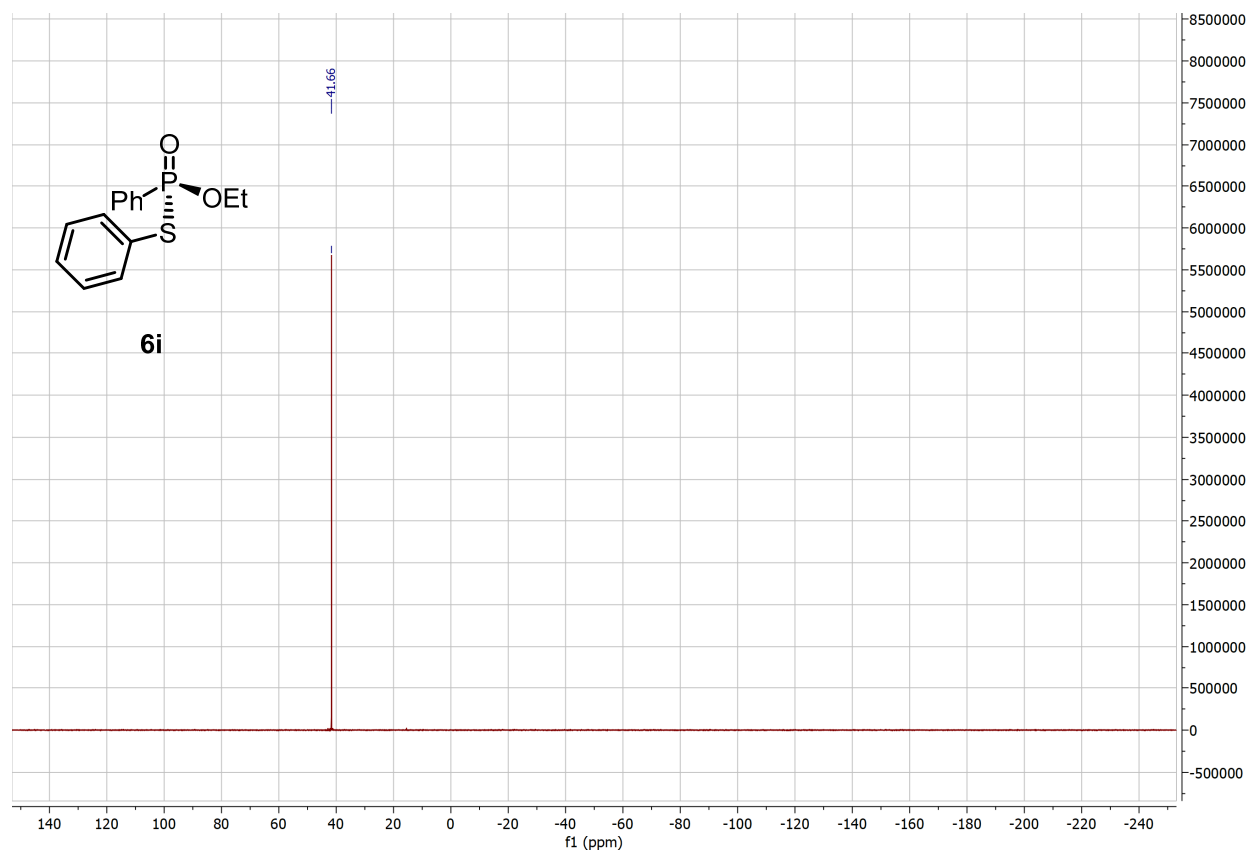

# <sup>1</sup>H NMR

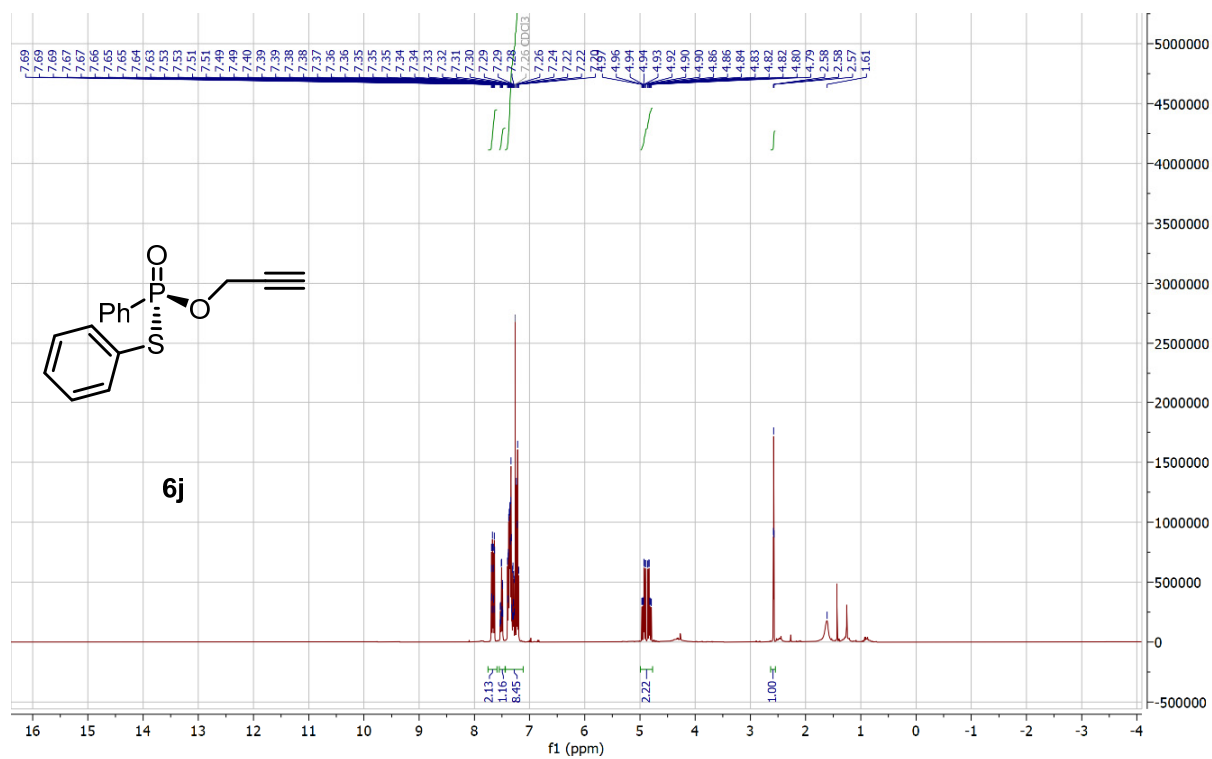

# <sup>13</sup>C NMR

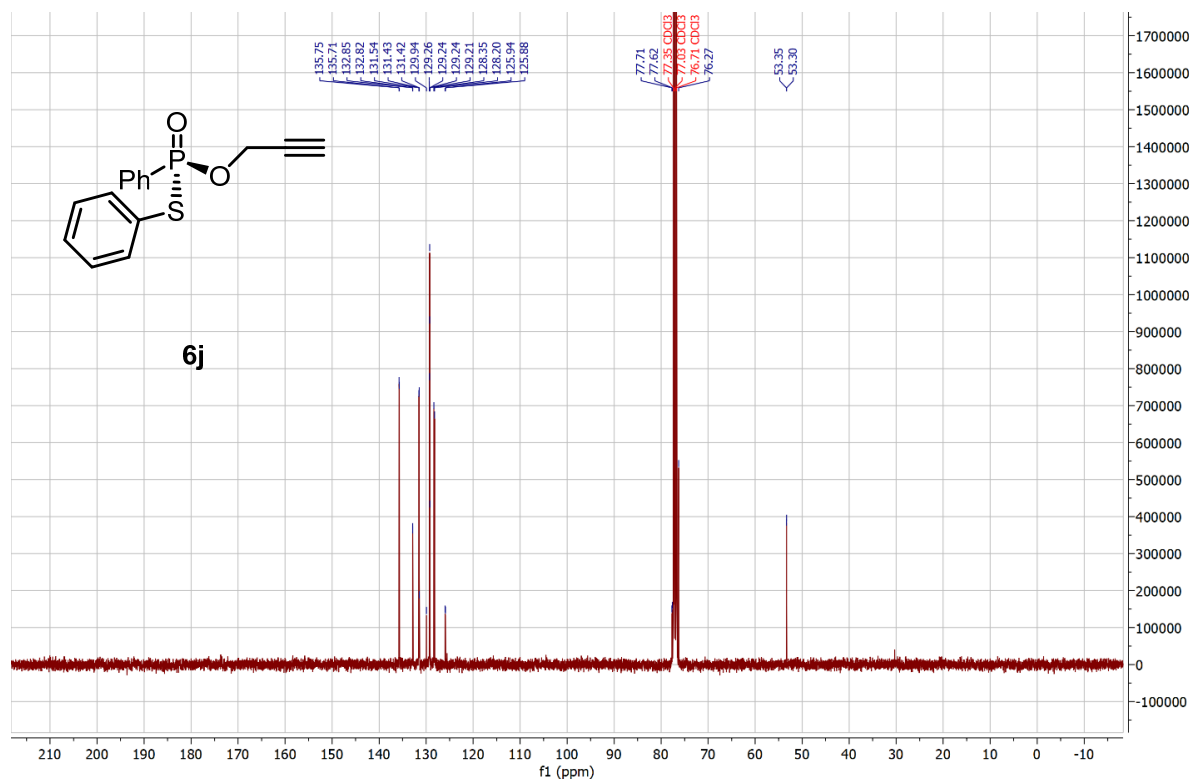

$^{31}\text{P}$  NMR

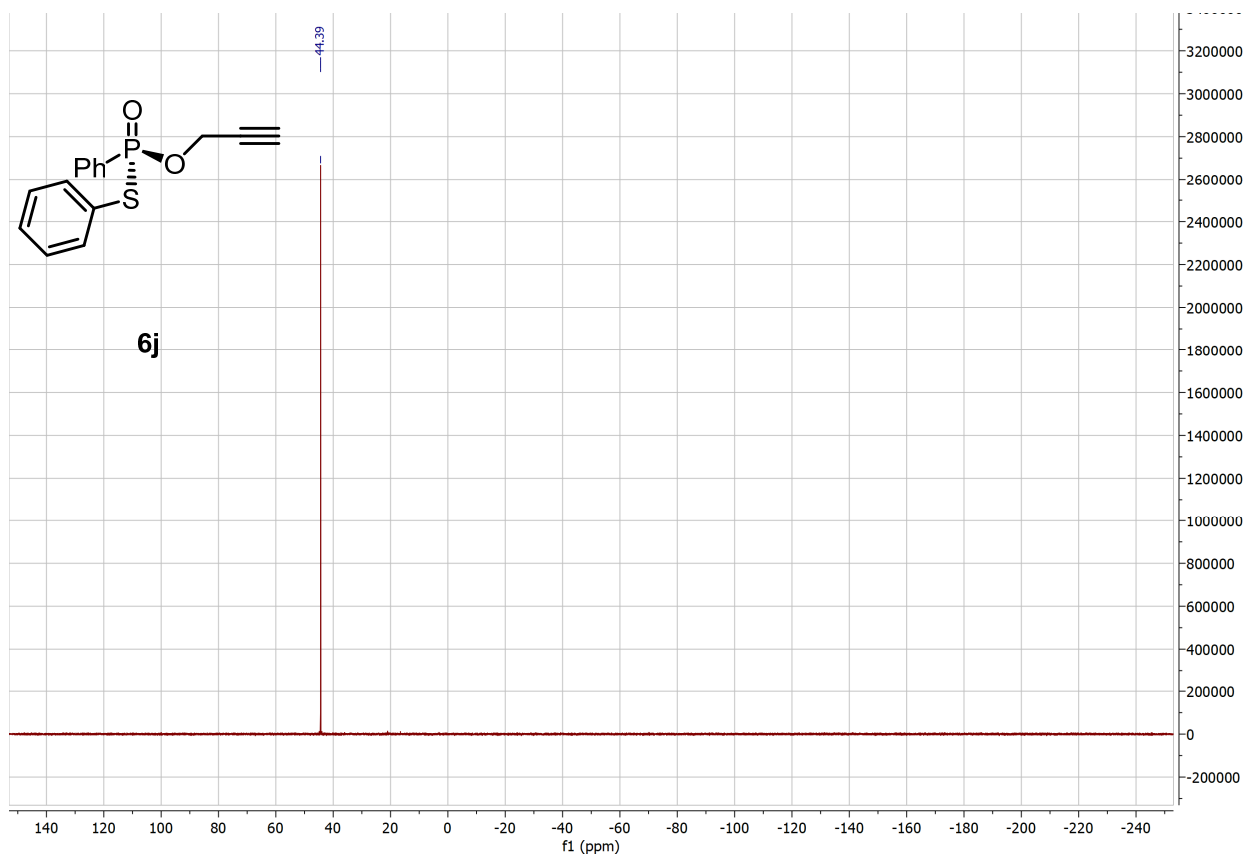

<sup>1</sup>H NMR

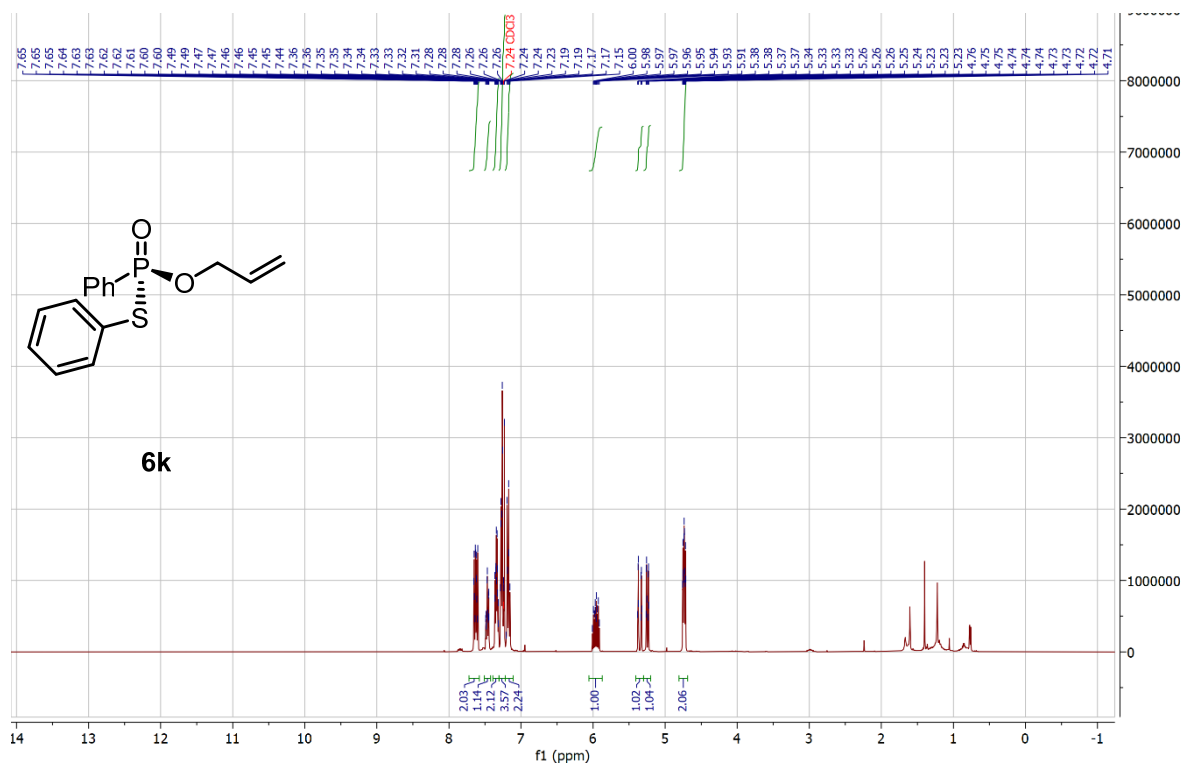

<sup>13</sup>C NMR

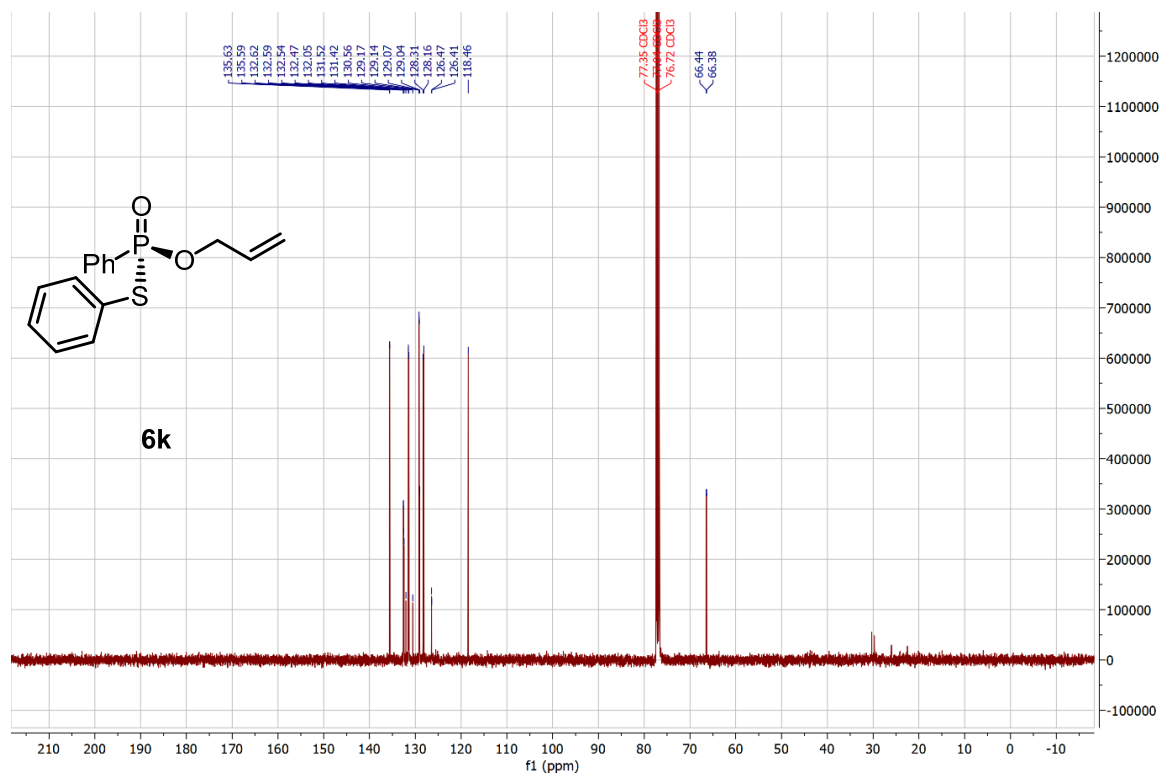

$^{31}\text{P}$  NMR

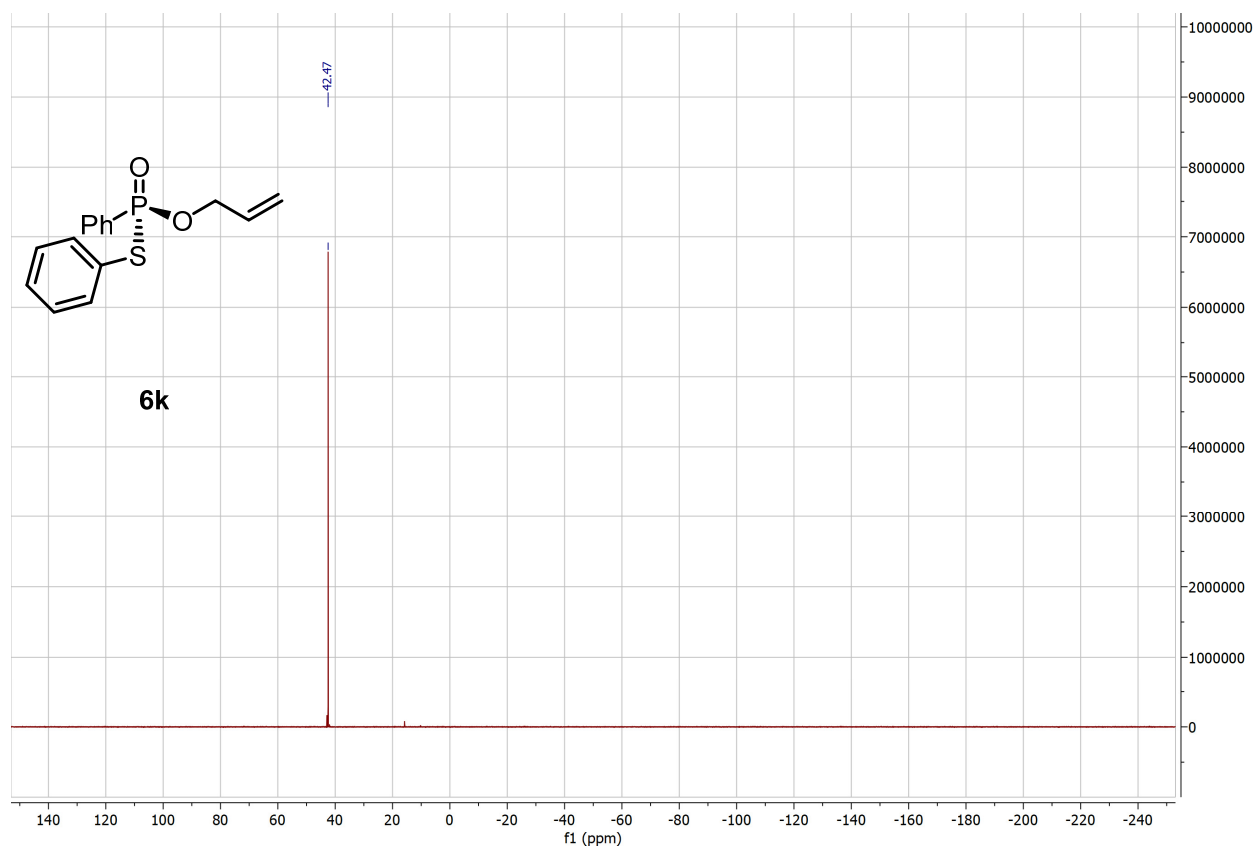

<sup>1</sup>H NMR

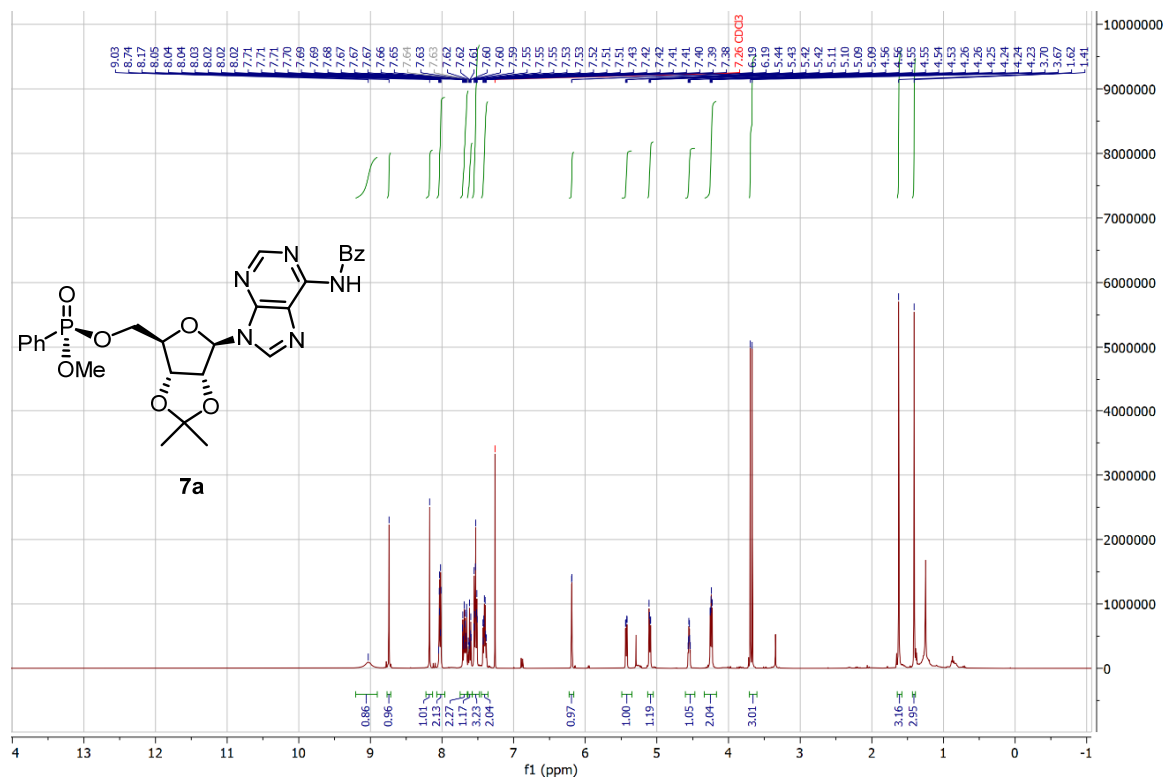

<sup>13</sup>C NMR

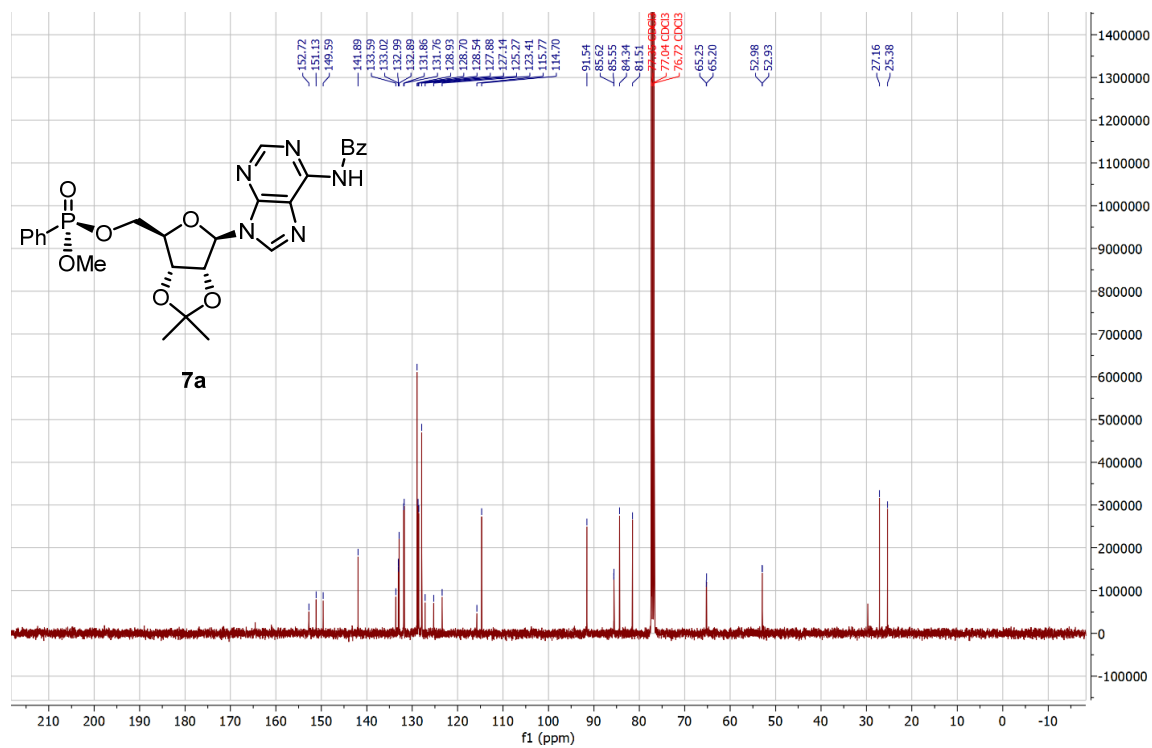

$^{31}\text{P}$  NMR

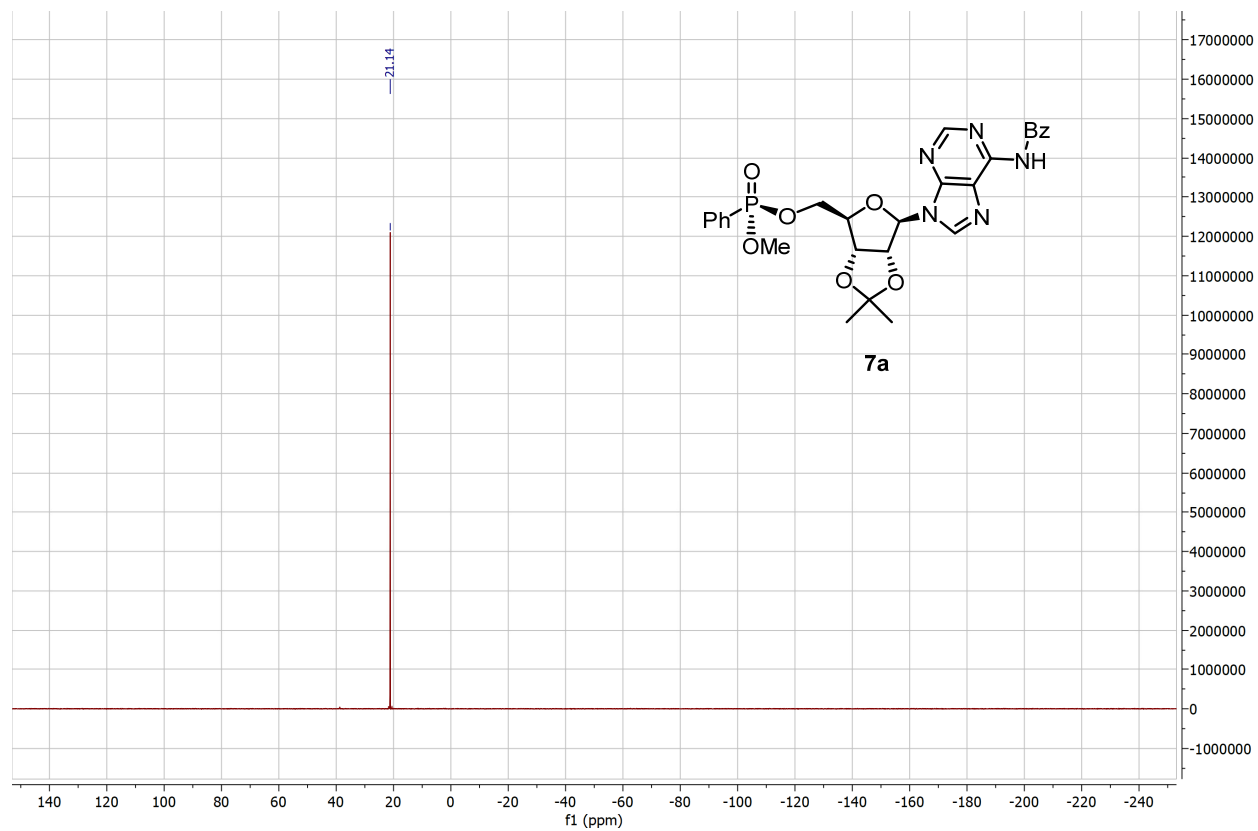

<sup>1</sup>H NMR

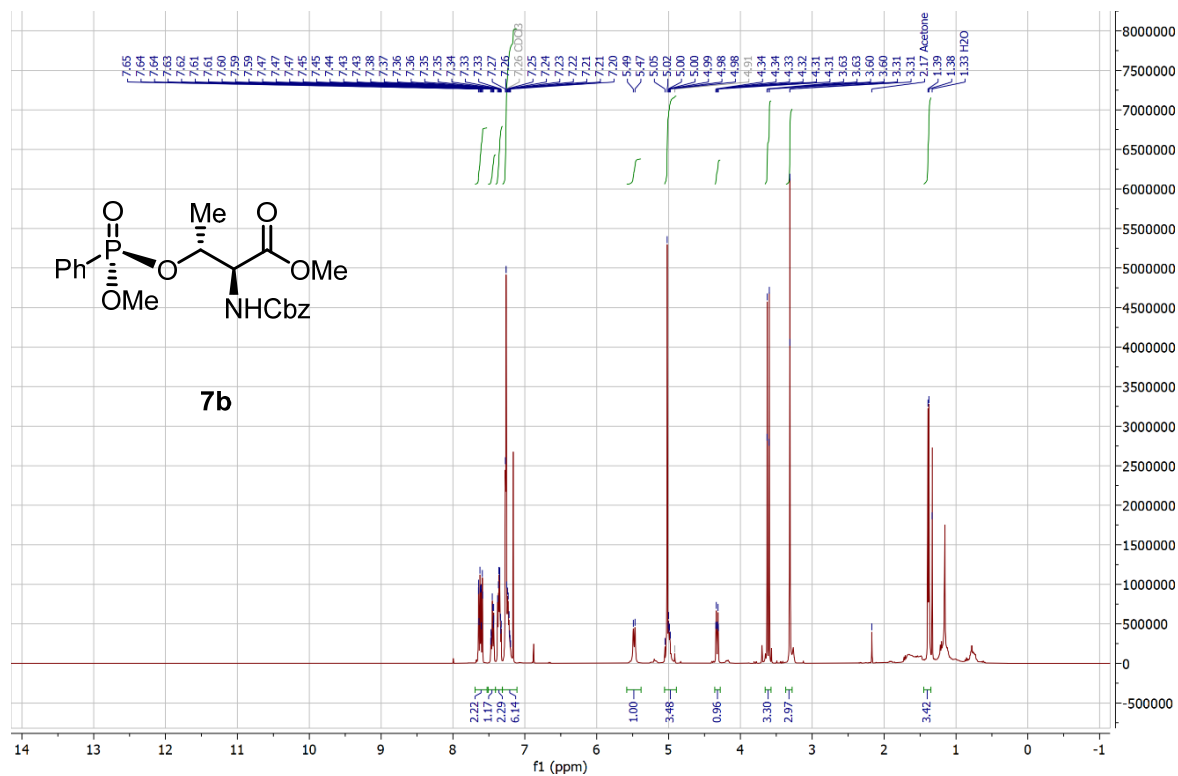

<sup>13</sup>C NMR

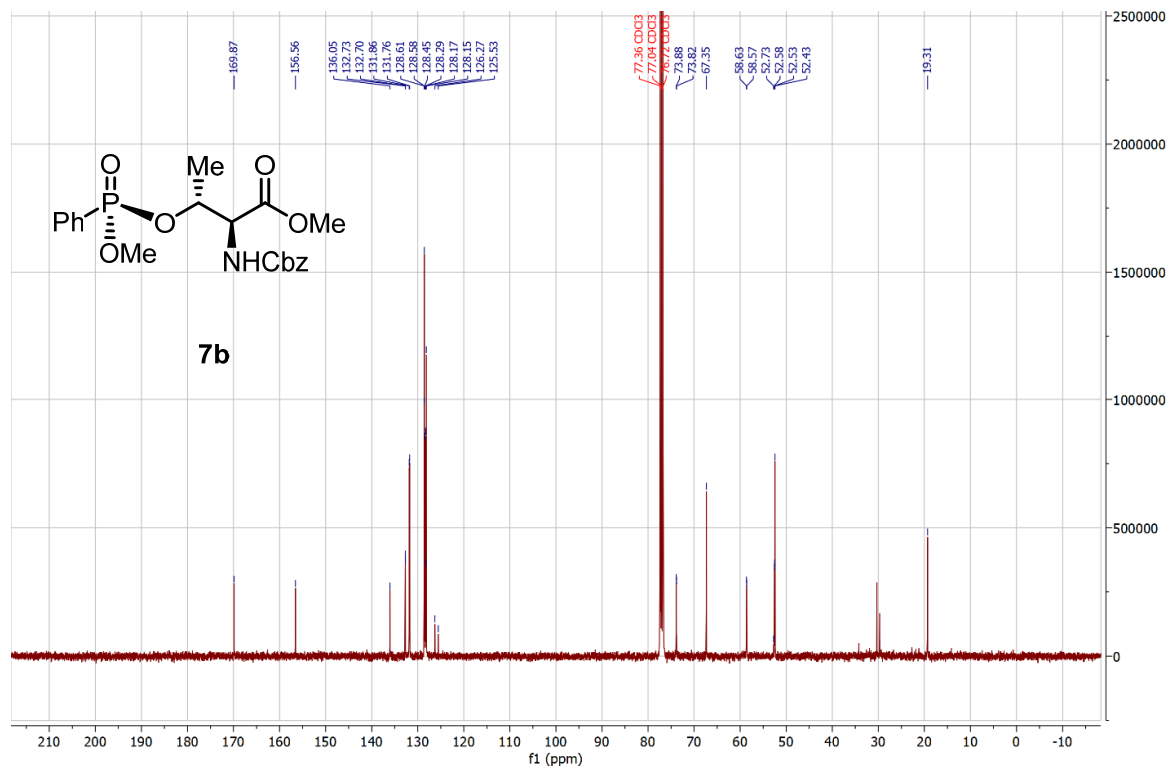



$^{31}\text{P}$  NMR

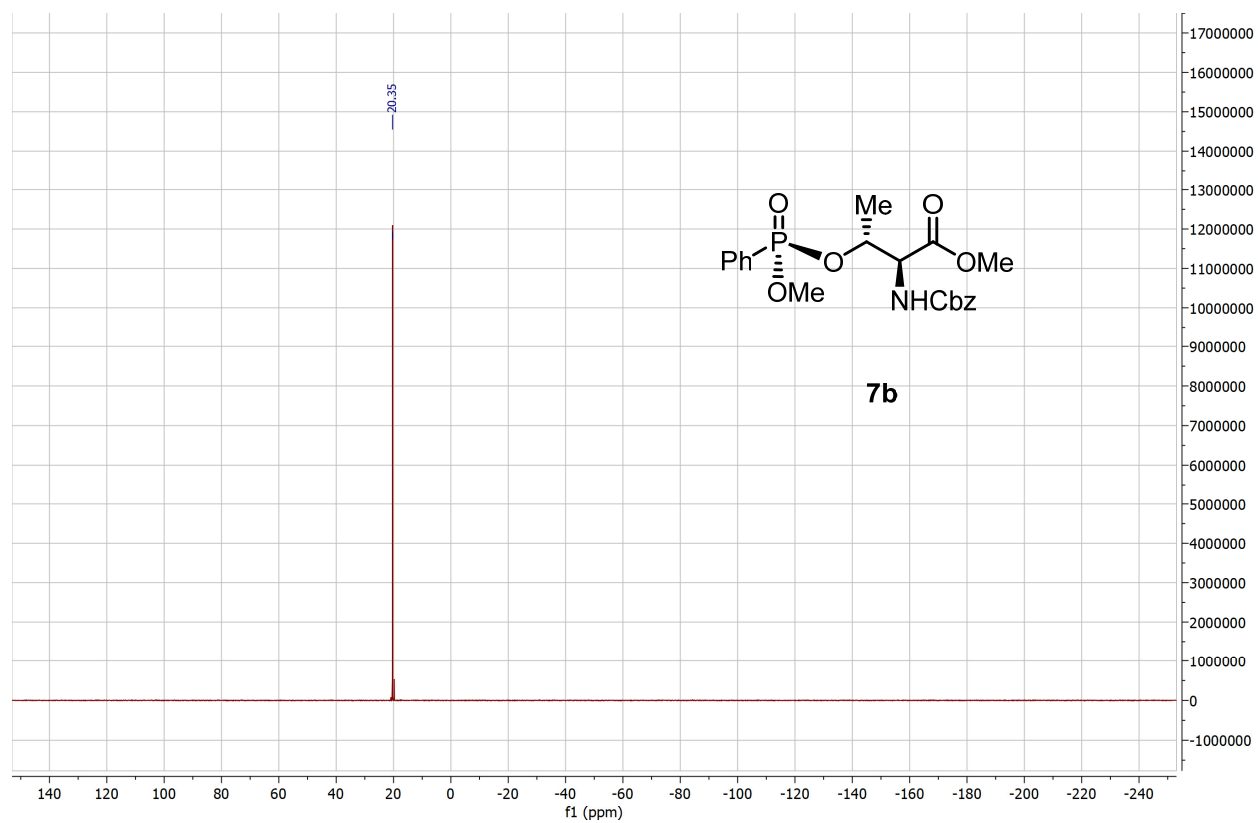

<sup>1</sup>H NMR

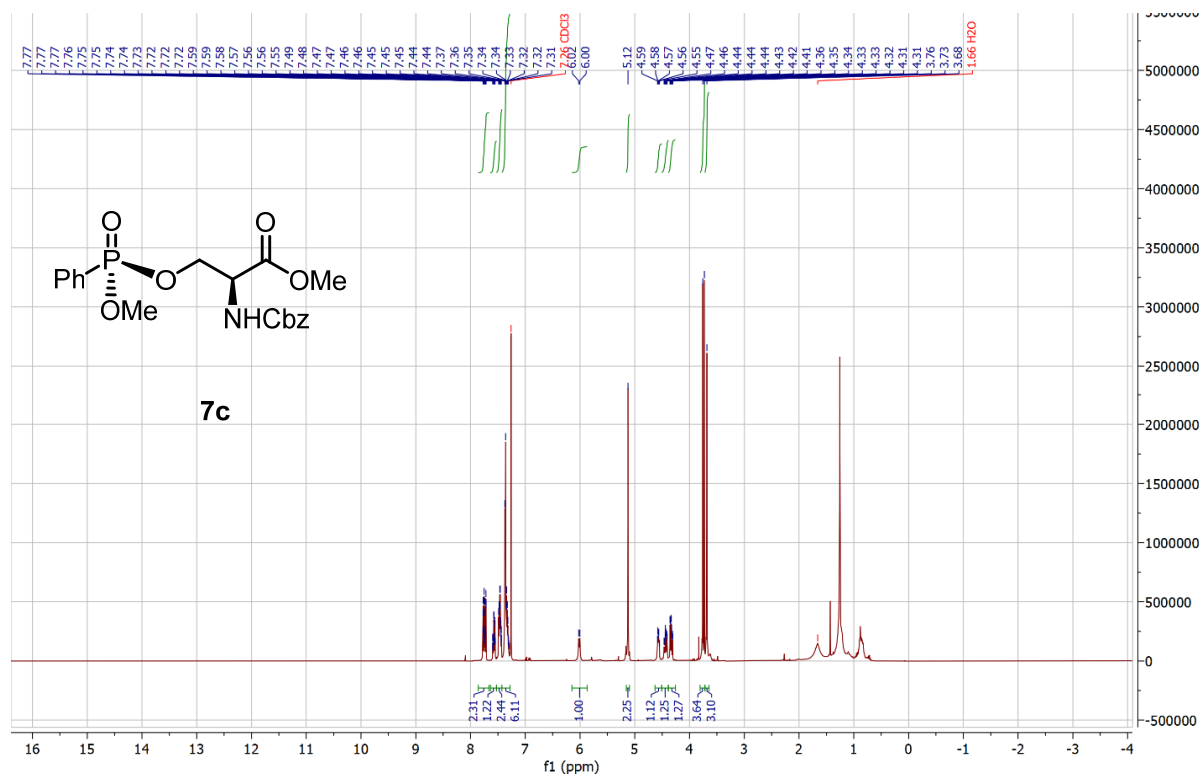

<sup>13</sup>C NMR

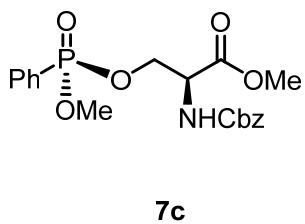

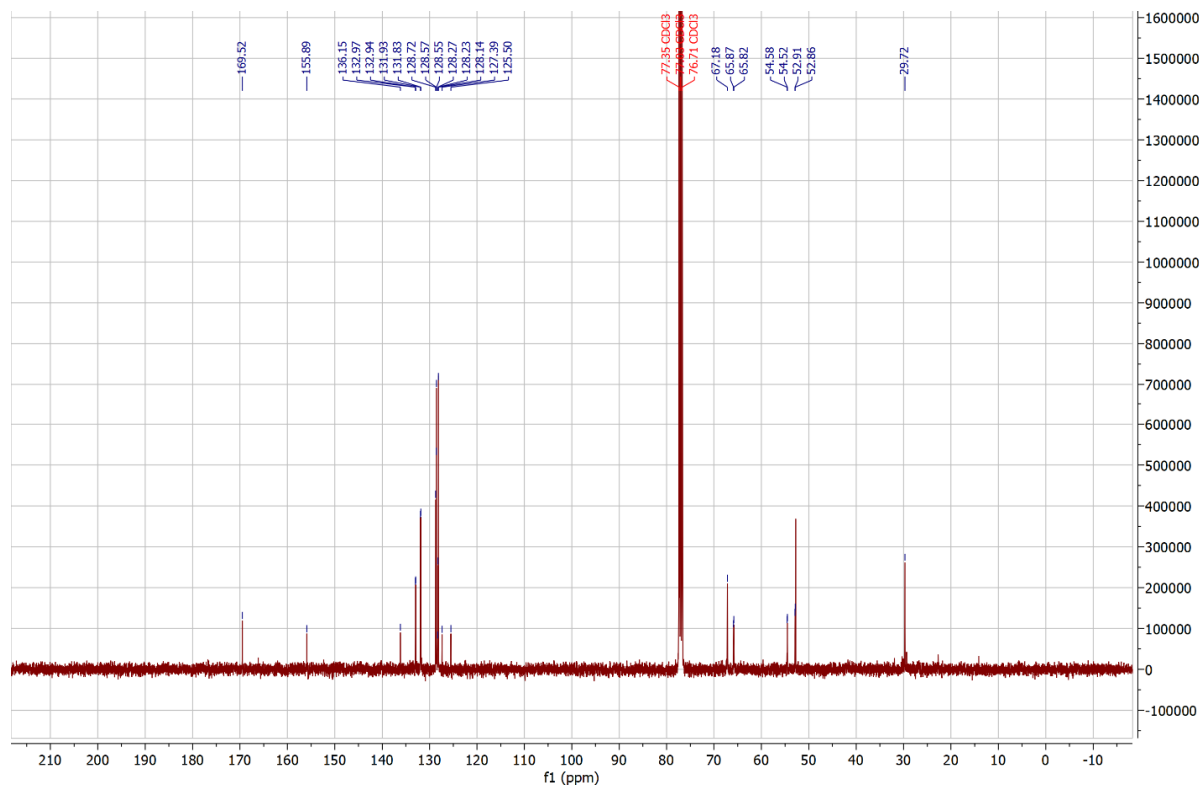

<sup>31</sup>P NMR

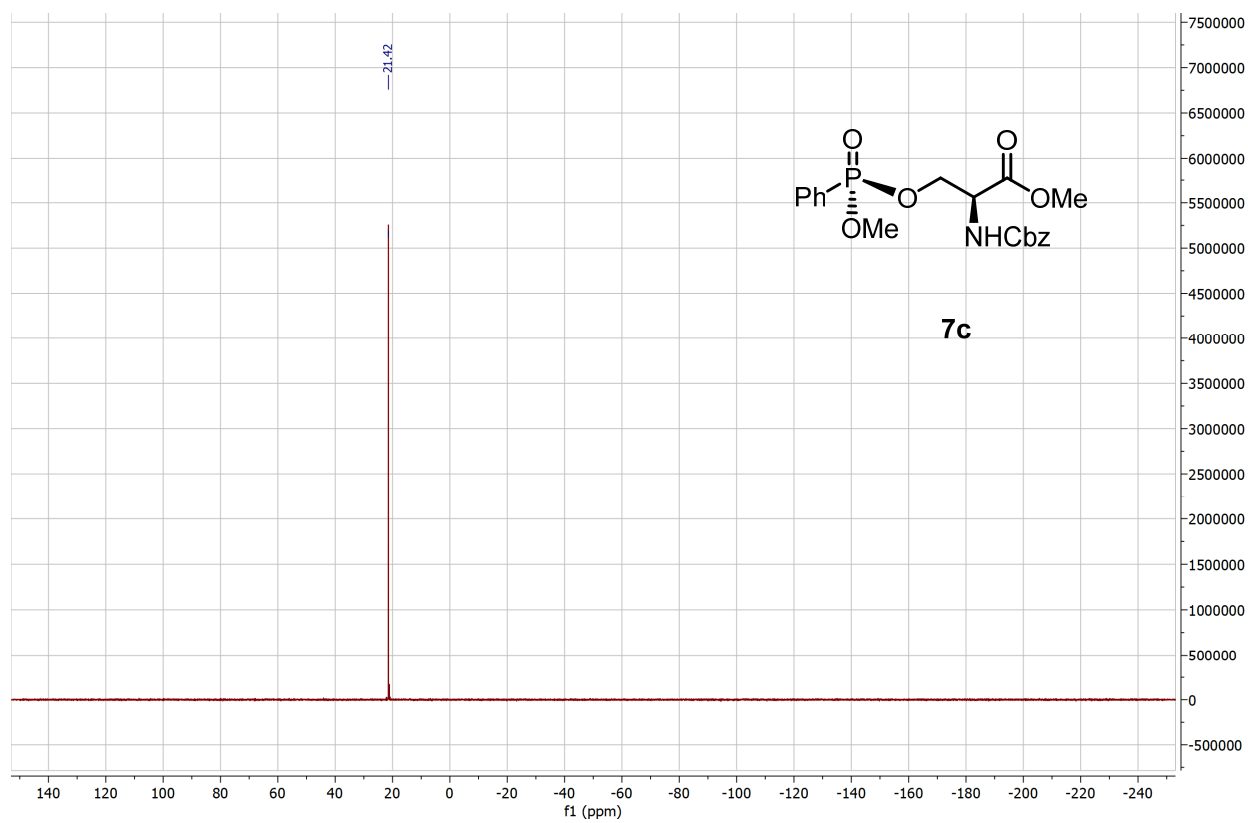

S187

# <sup>1</sup>H NMR

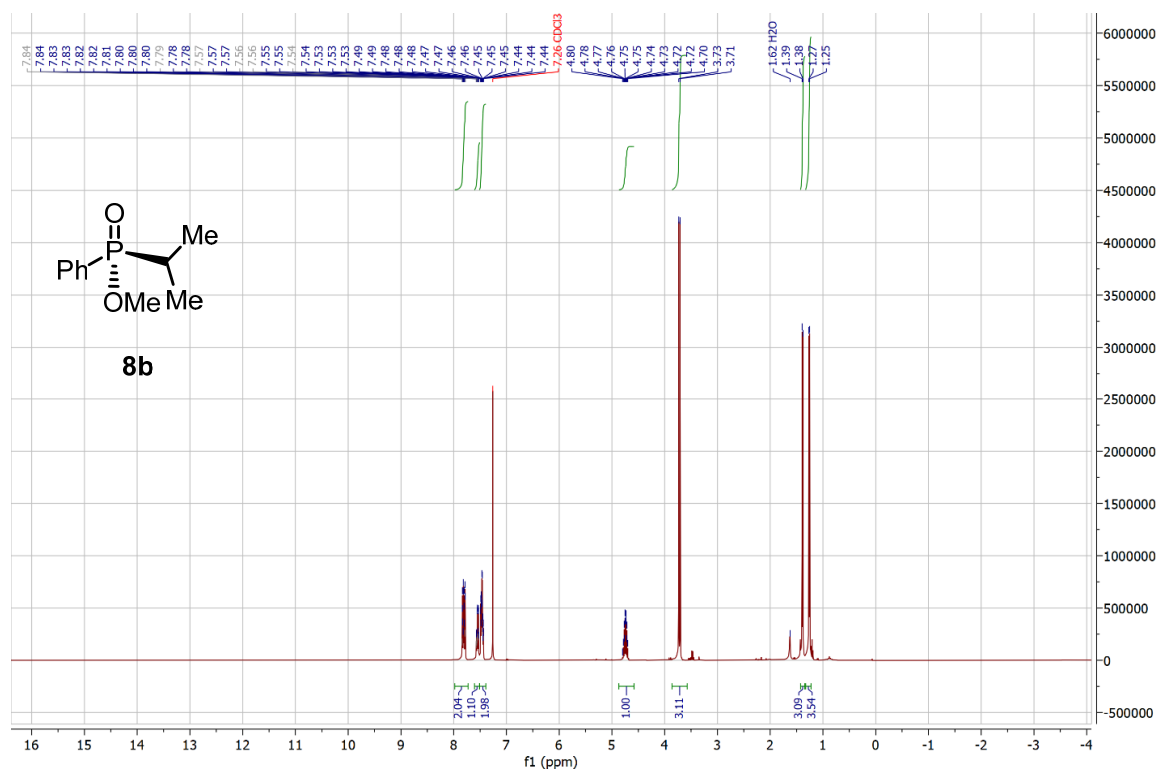

# <sup>13</sup>C NMR

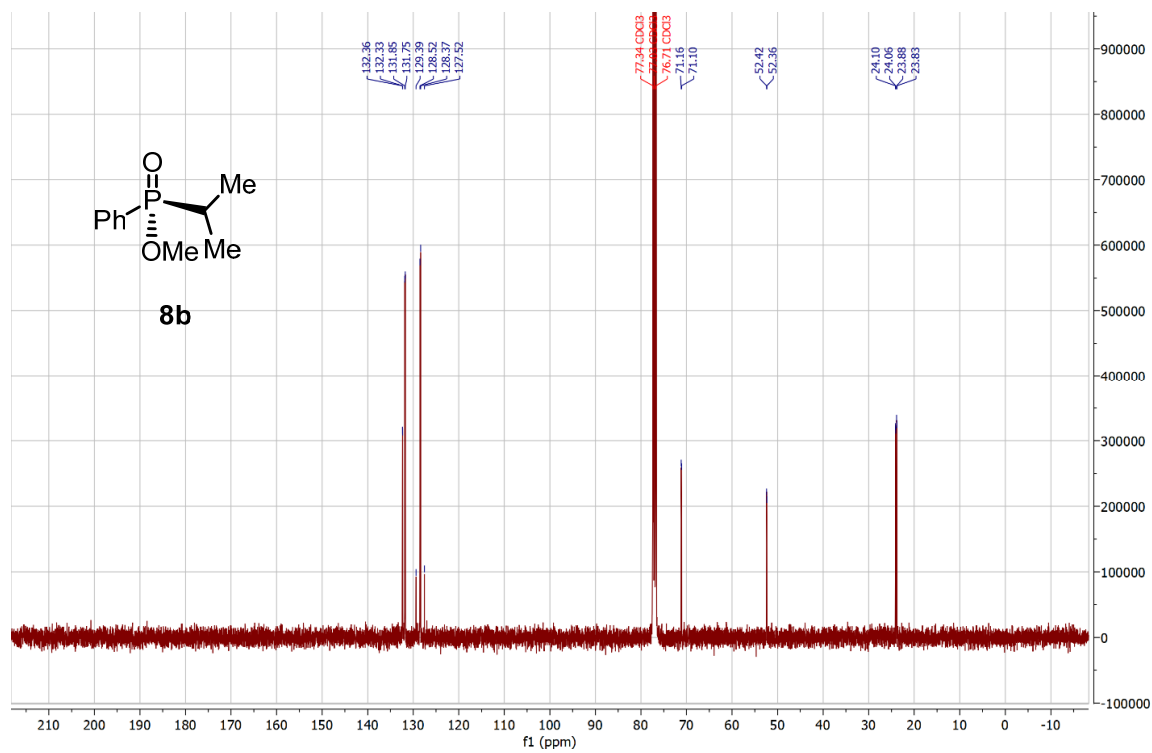

$^{31}\text{P}$  NMR

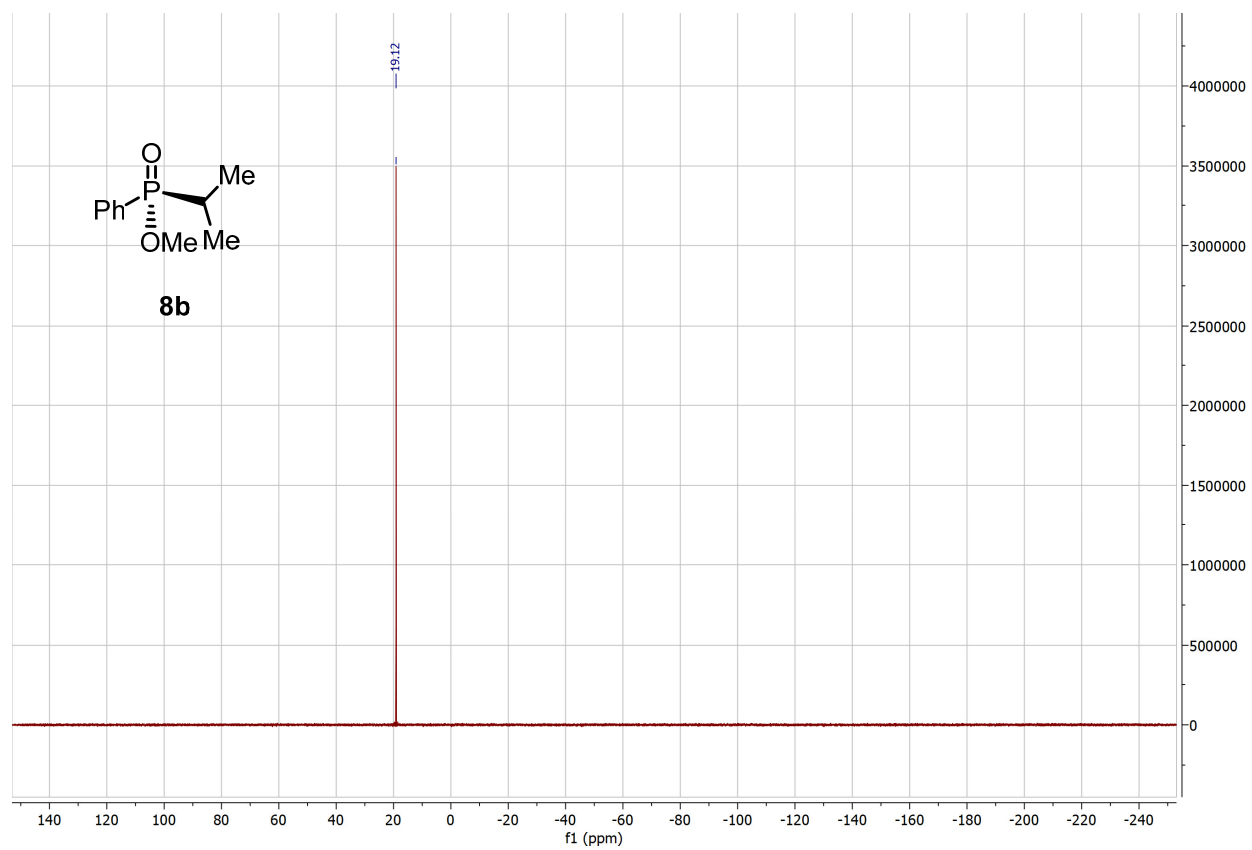

# <sup>1</sup>H NMR

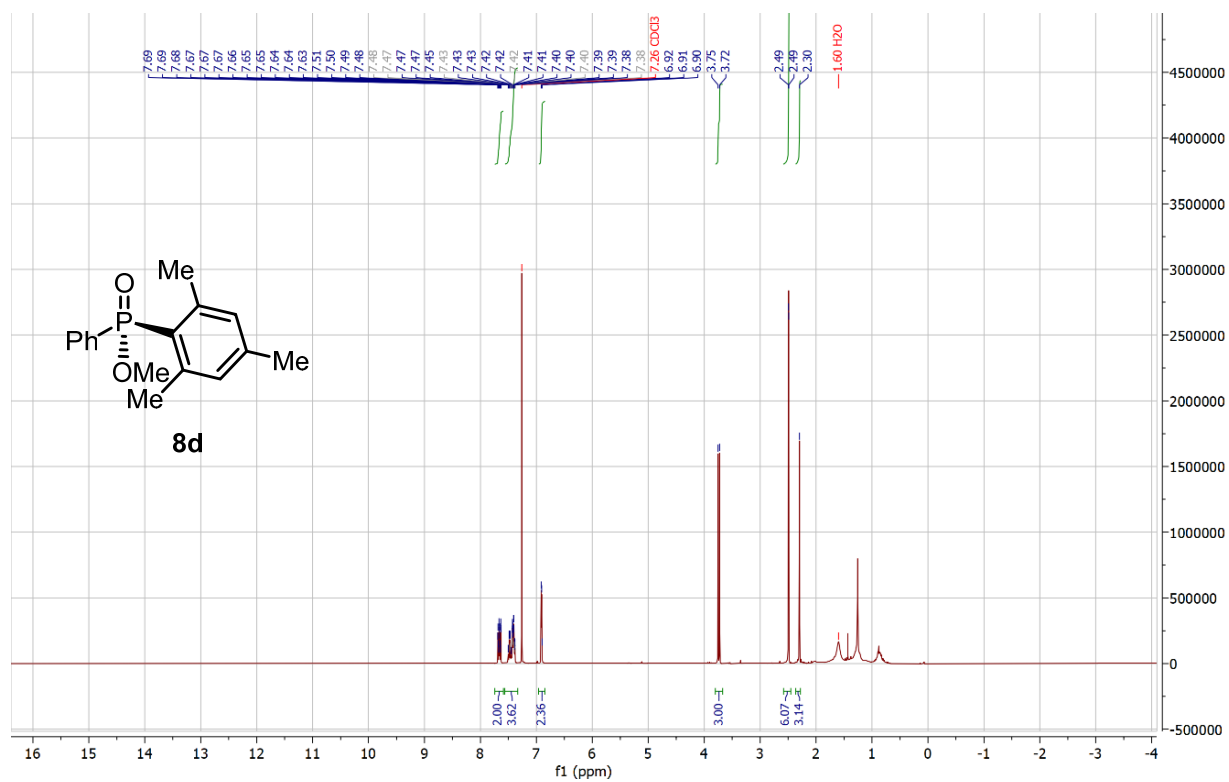

$^{31}\text{P}$  NMR

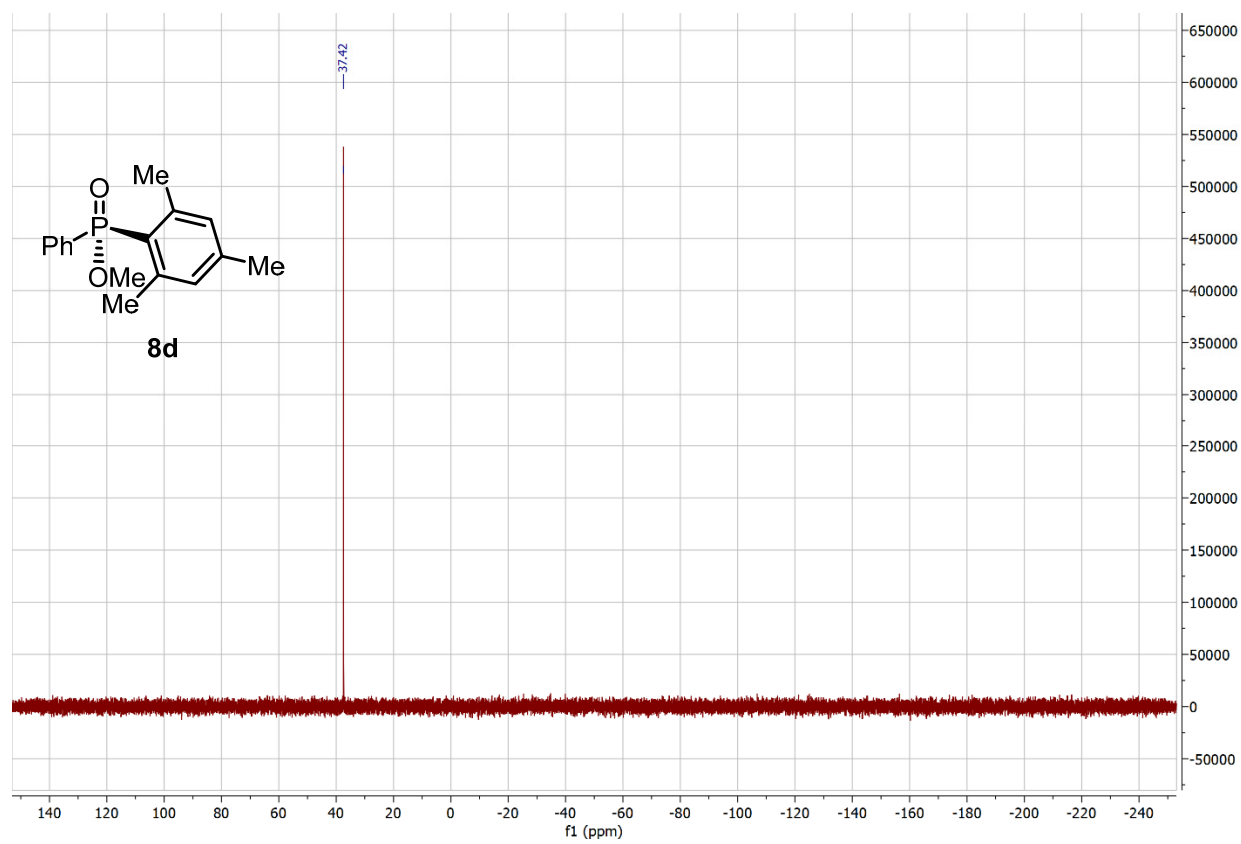

# <sup>1</sup>H NMR

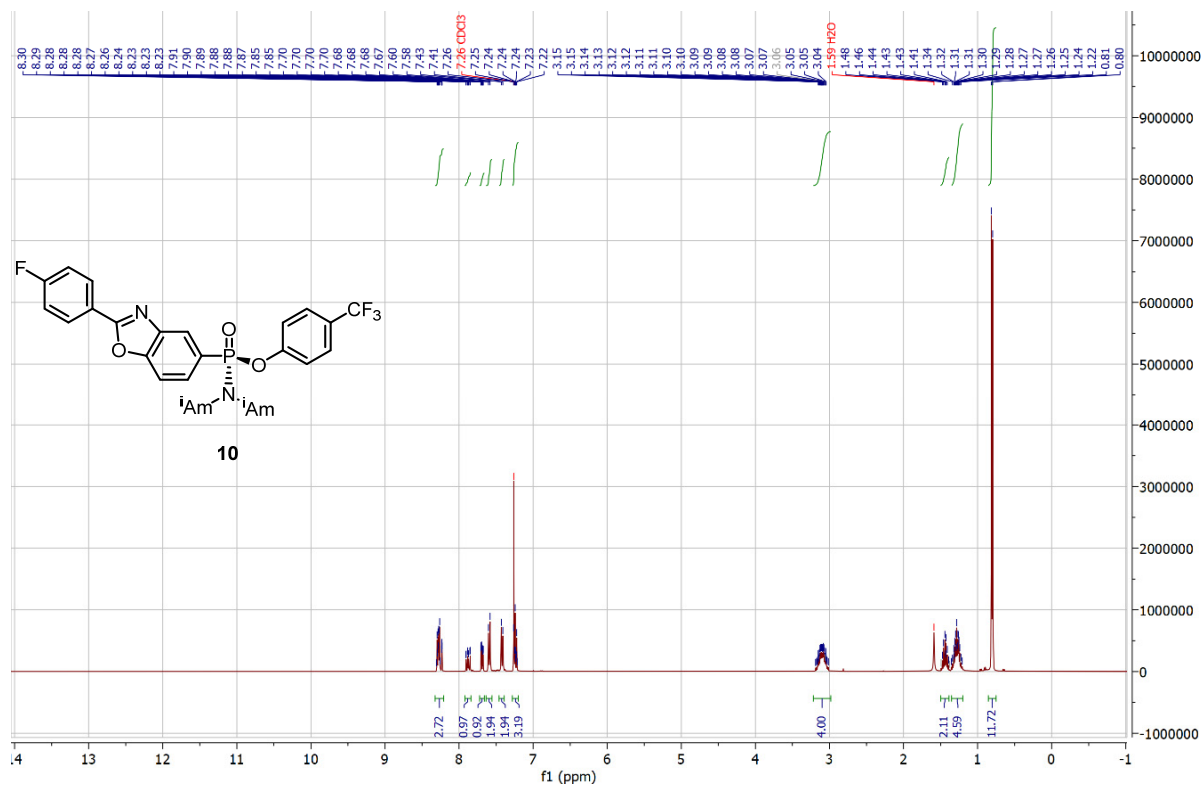

# <sup>13</sup>C NMR

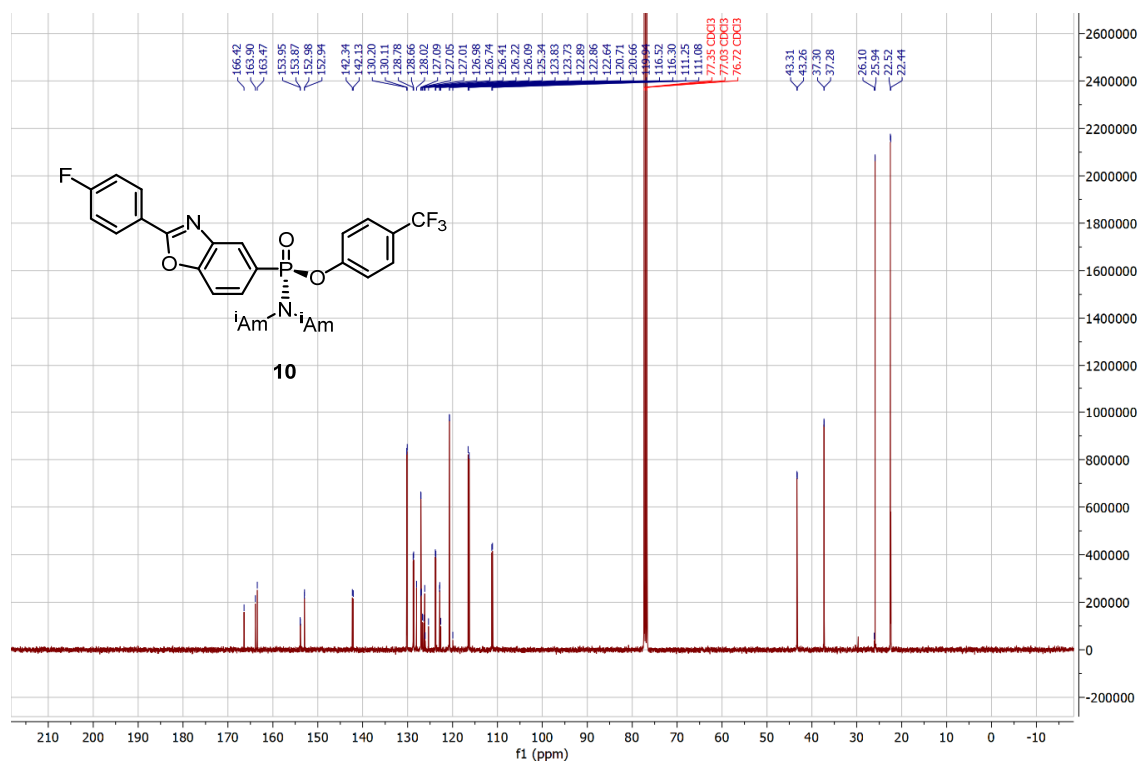



<sup>19</sup>F NMR

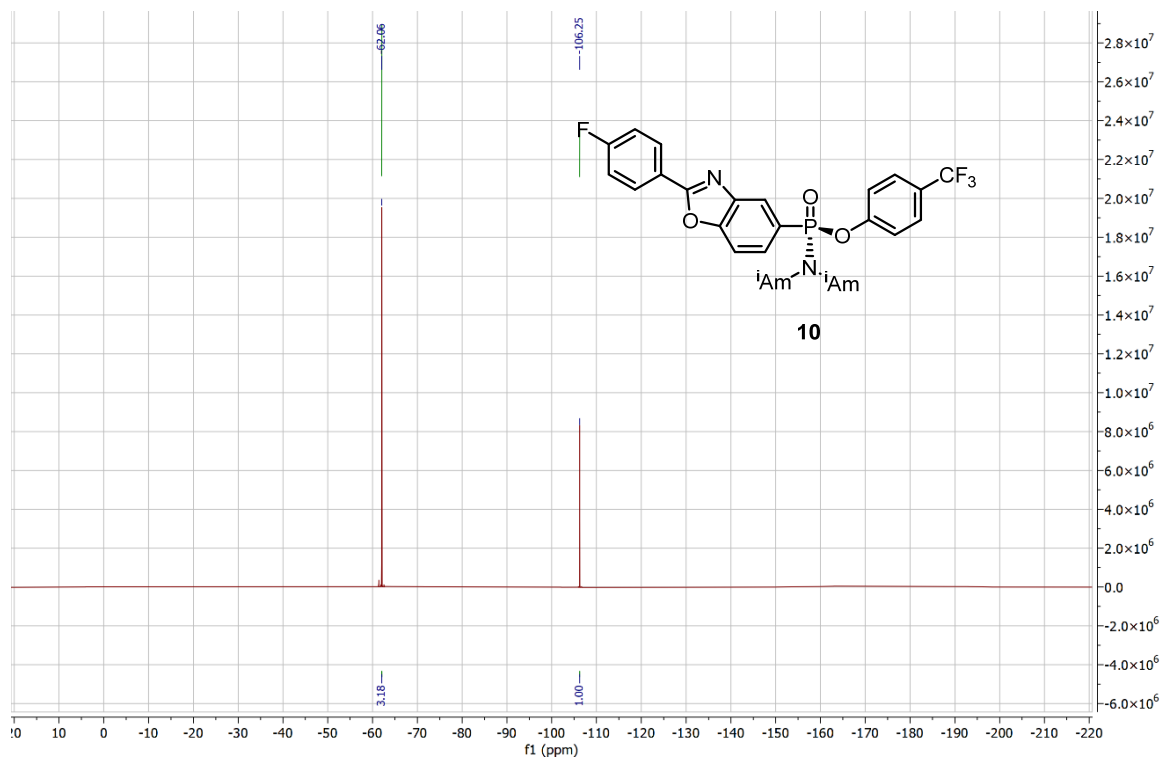

<sup>31</sup>P NMR

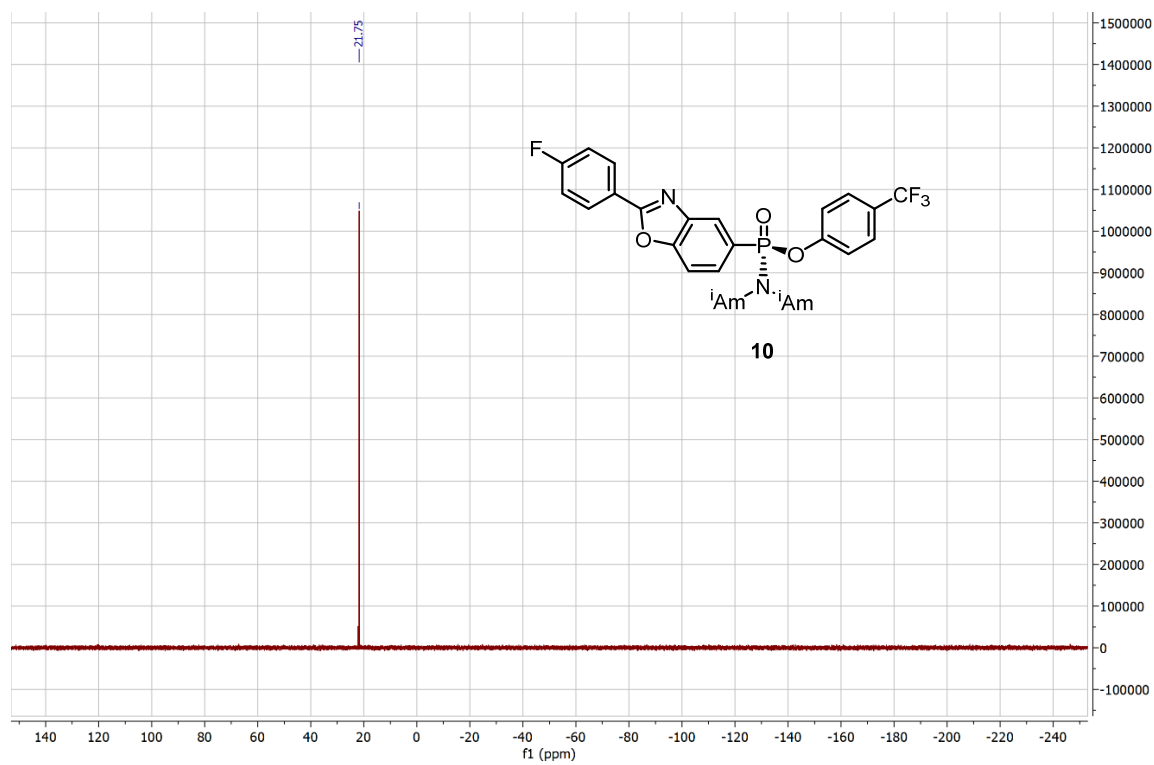

# <sup>1</sup>H NMR

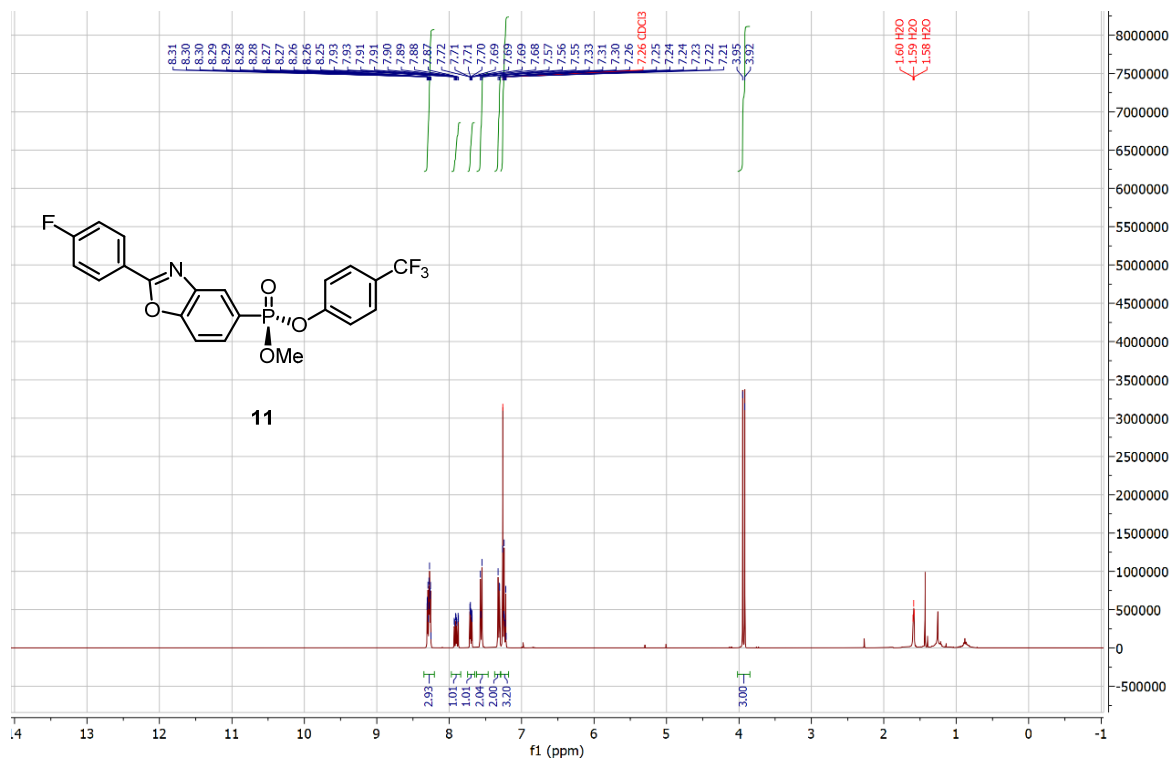

# <sup>13</sup>C NMR

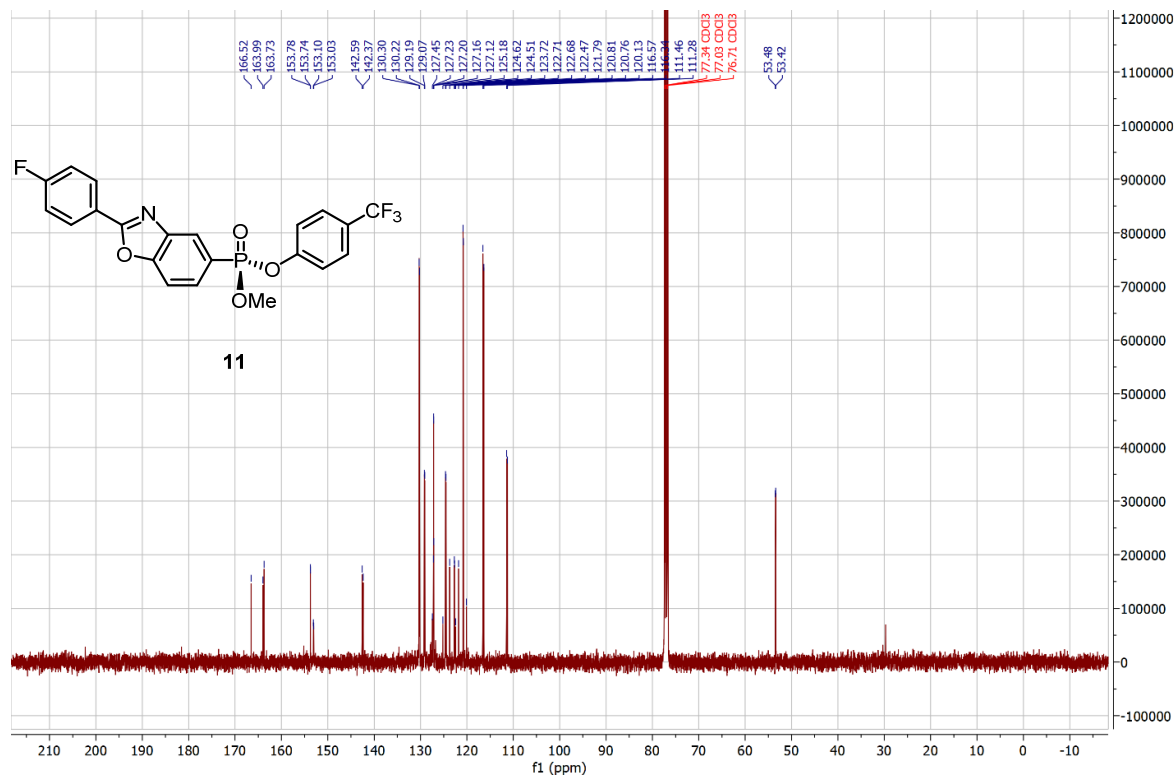

<sup>19</sup>F NMR

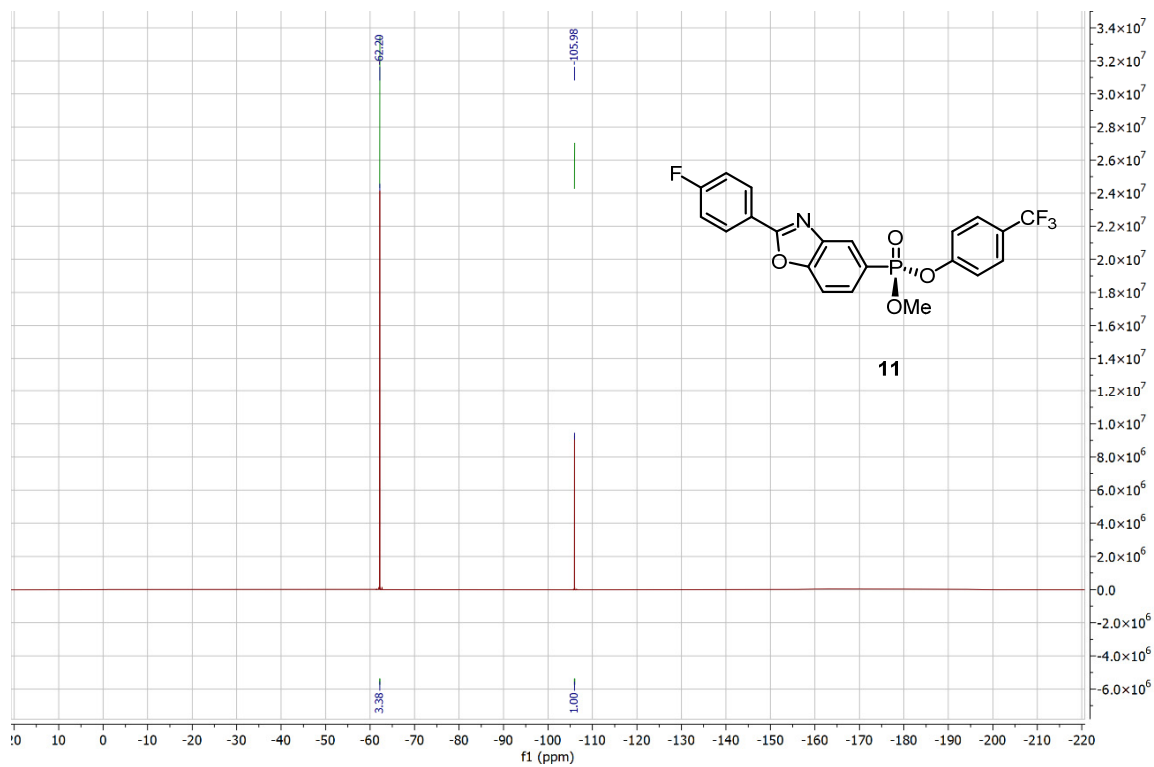

<sup>31</sup>P NMR

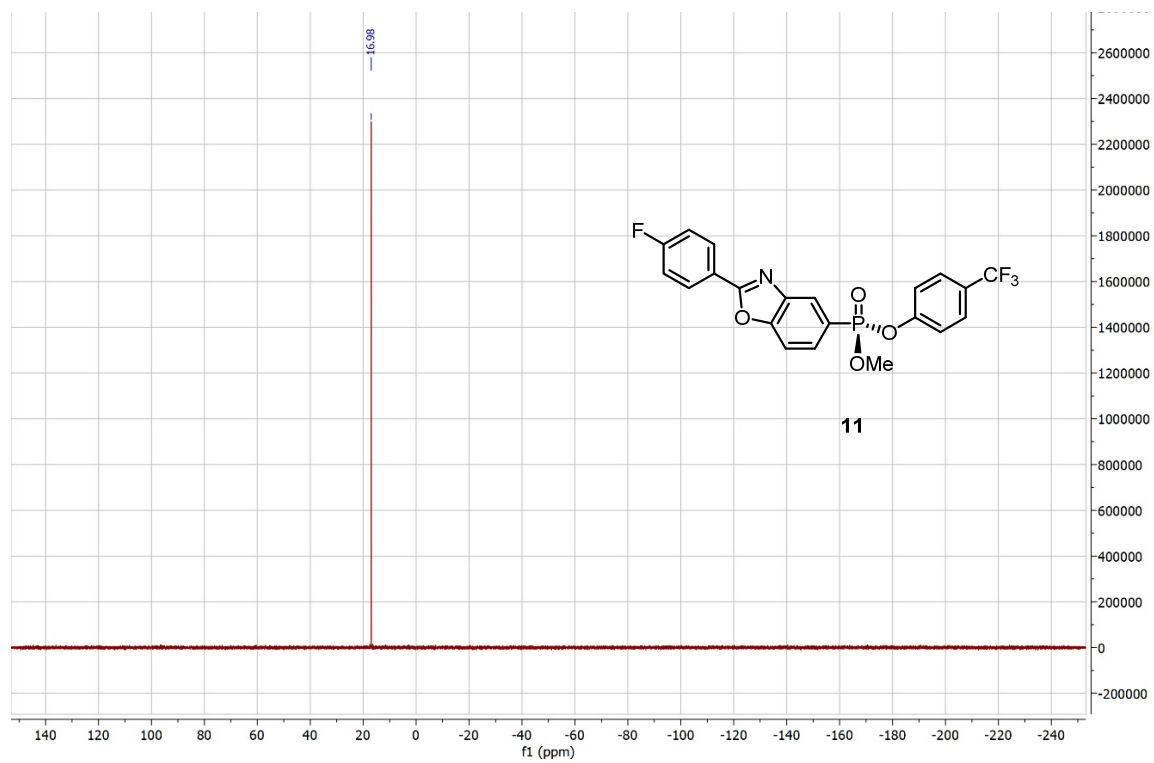

# <sup>1</sup>H NMR

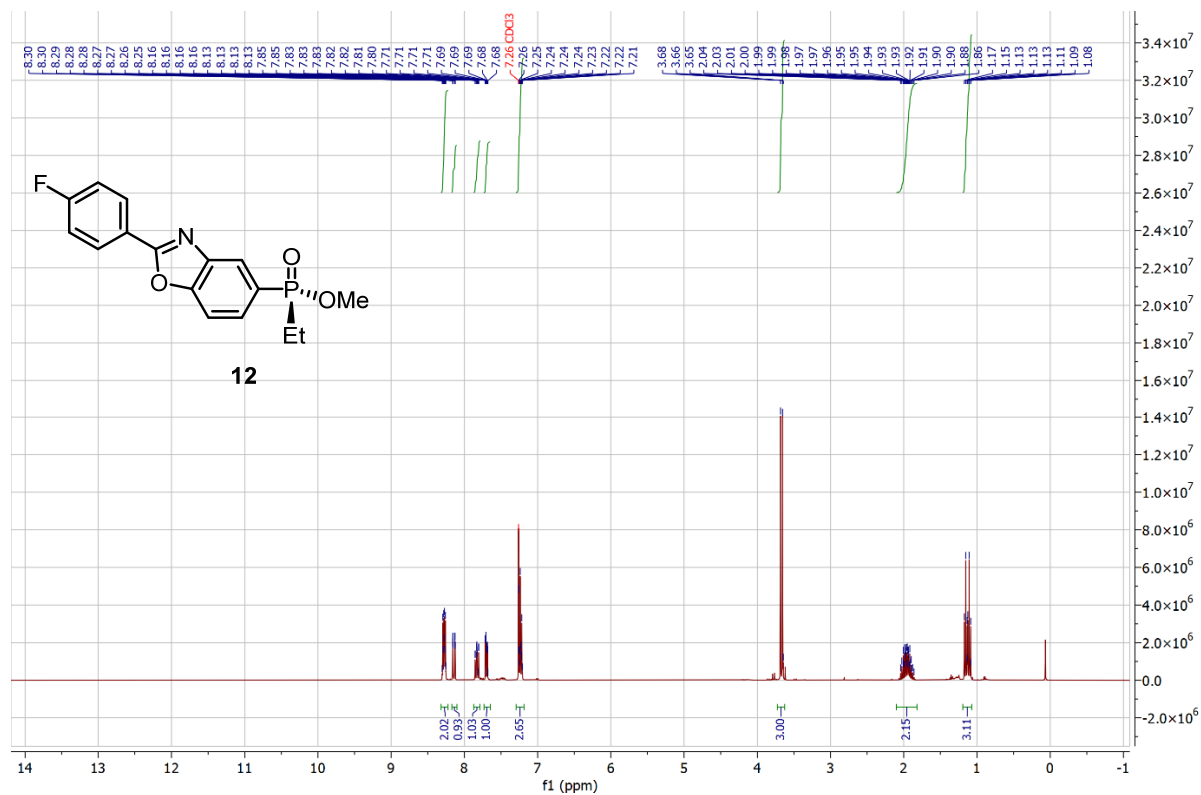

# <sup>13</sup>C NMR

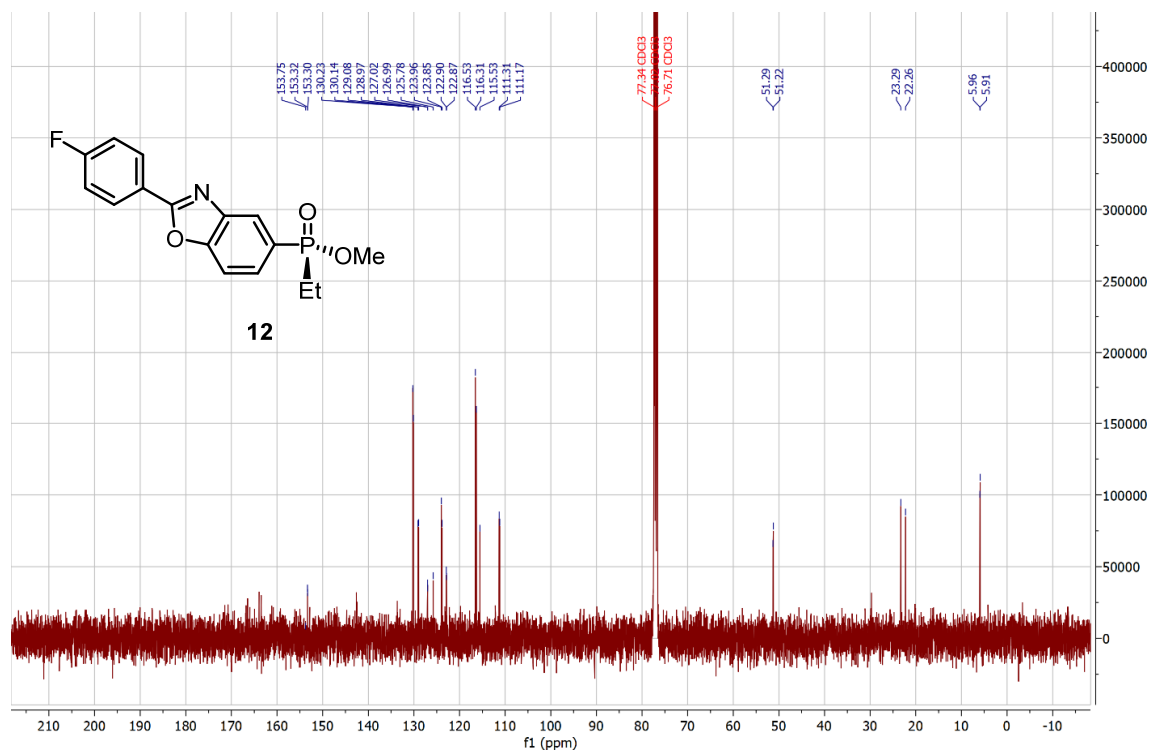

<sup>19</sup>F NMR

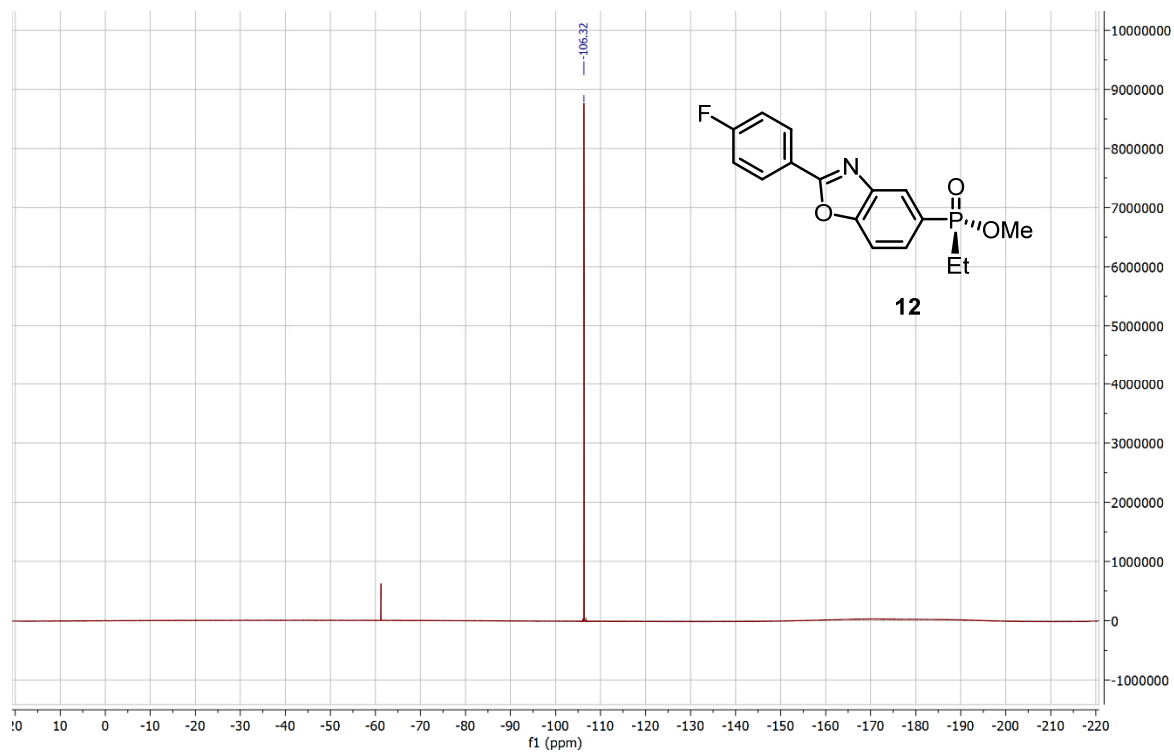

<sup>31</sup>P NMR

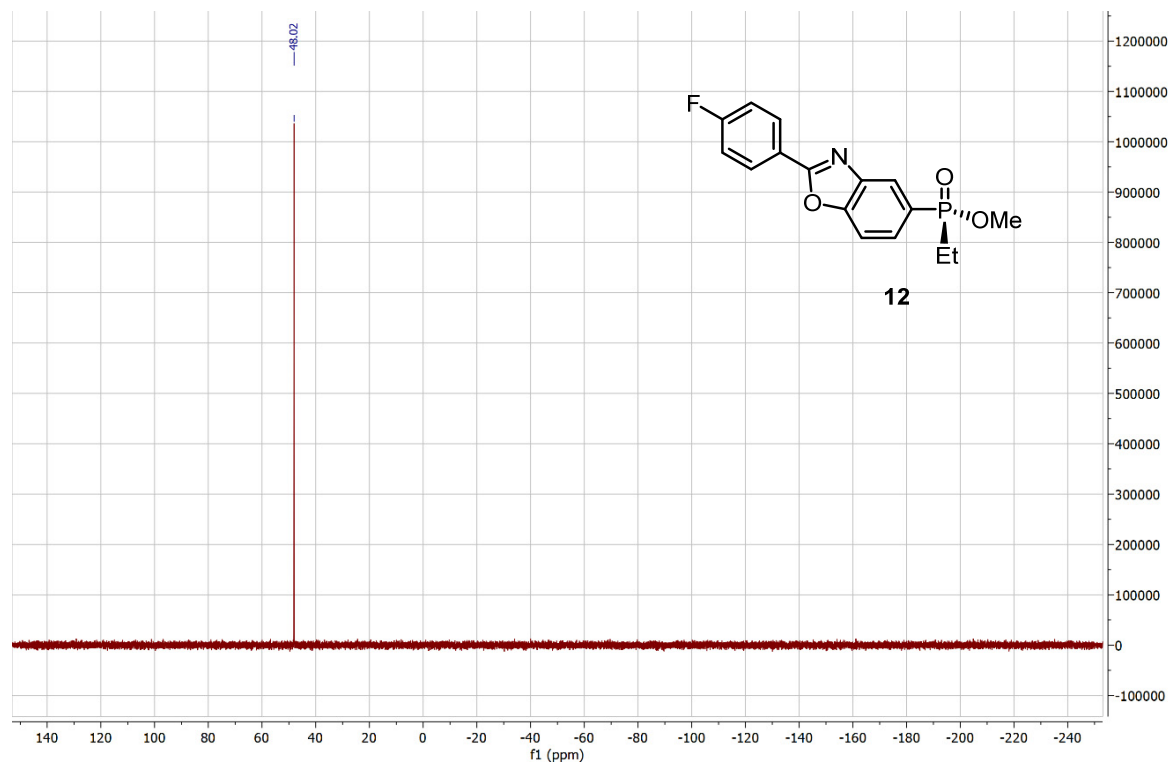

# <sup>1</sup>H NMR

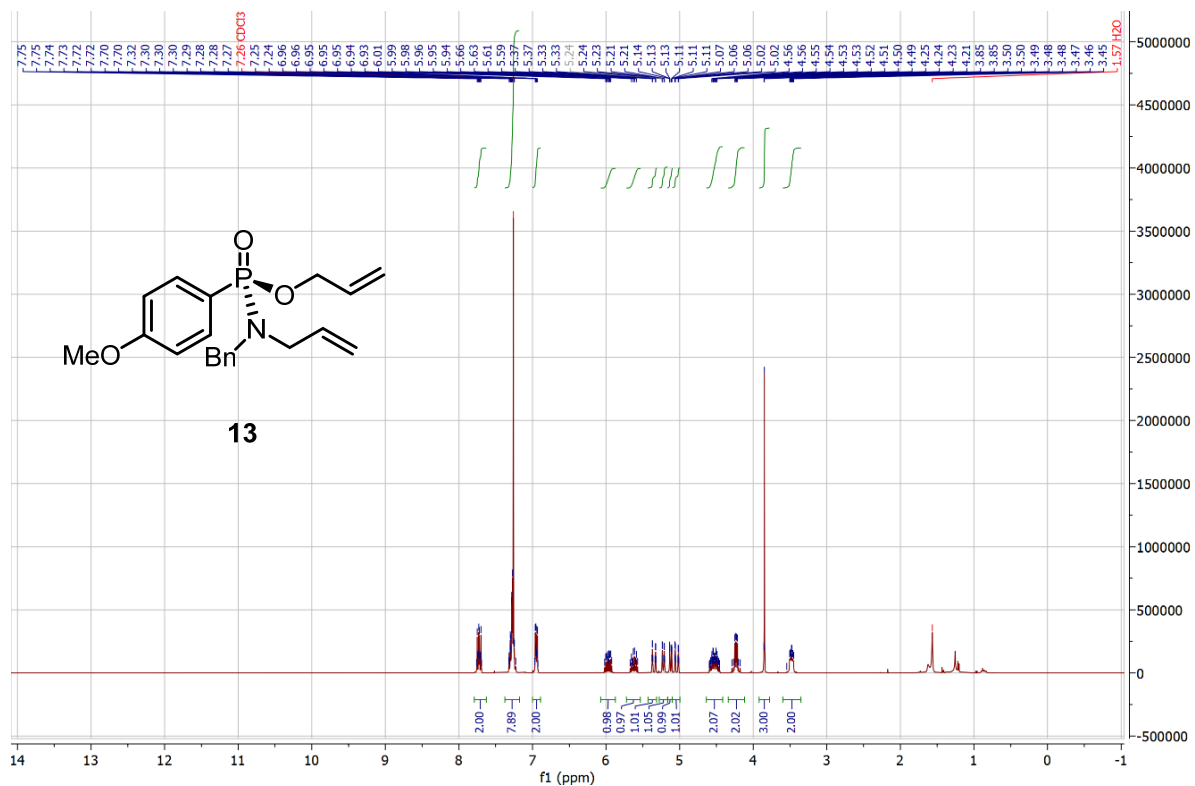

# <sup>13</sup>C NMR

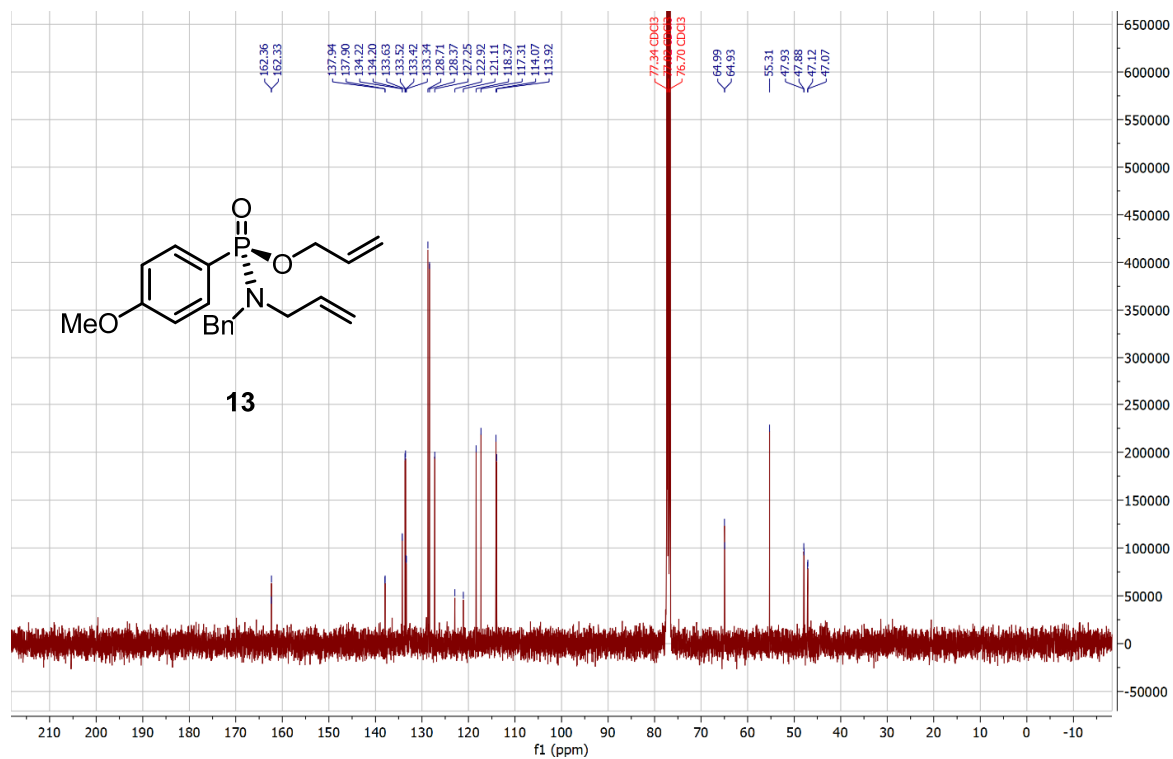

$^{31}\text{P}$  NMR

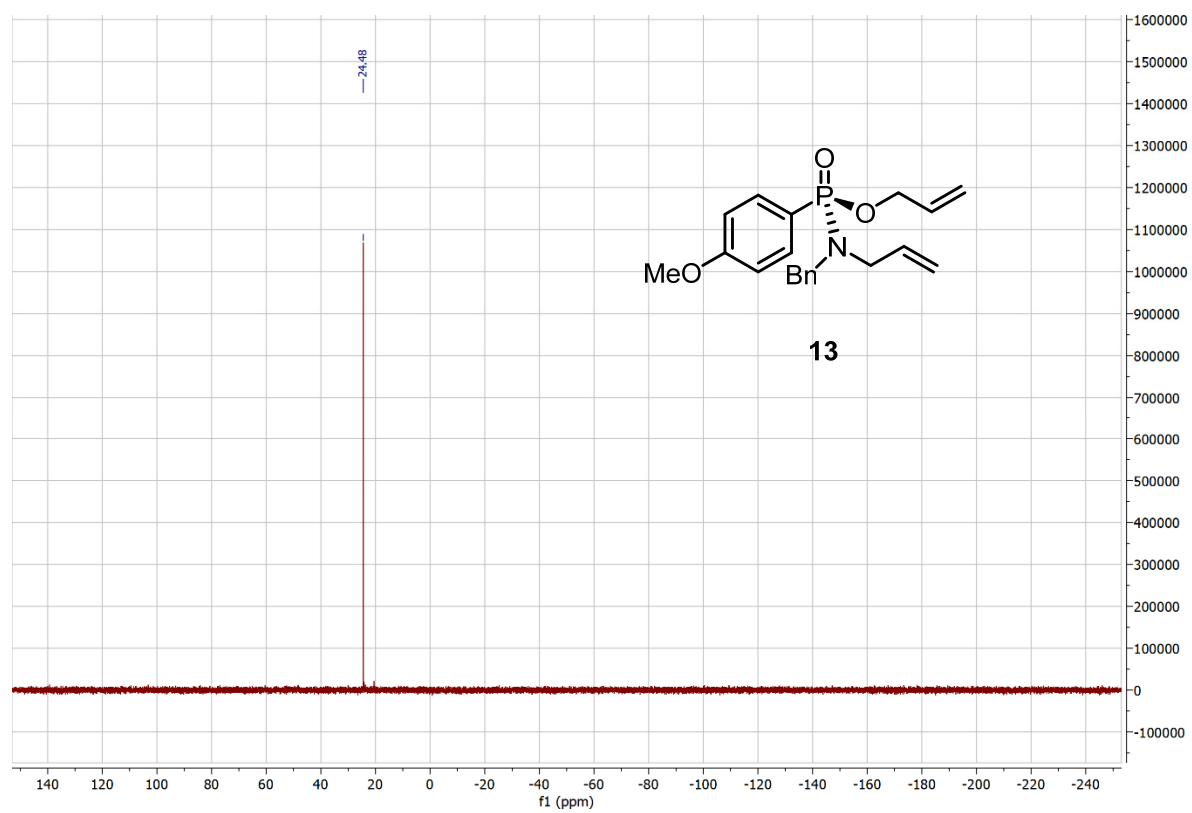

$^1\text{H}$  NMR

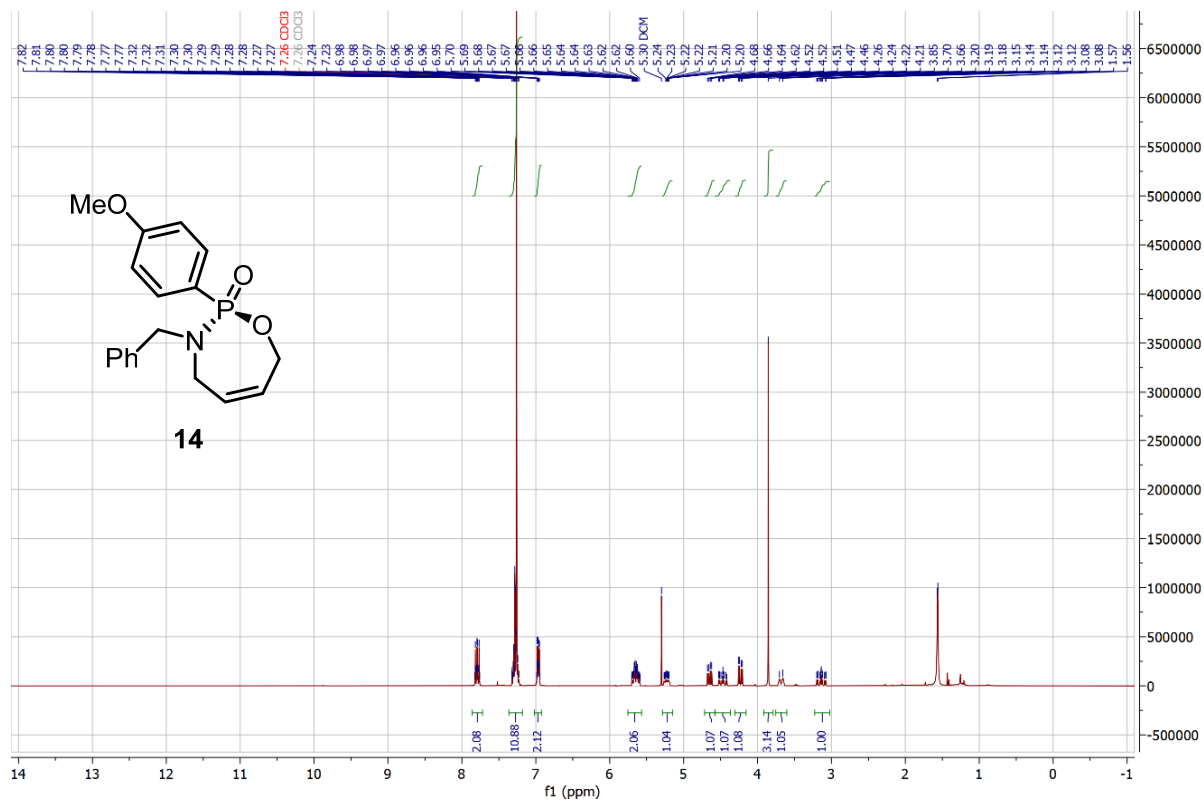

<sup>13</sup>C NMR

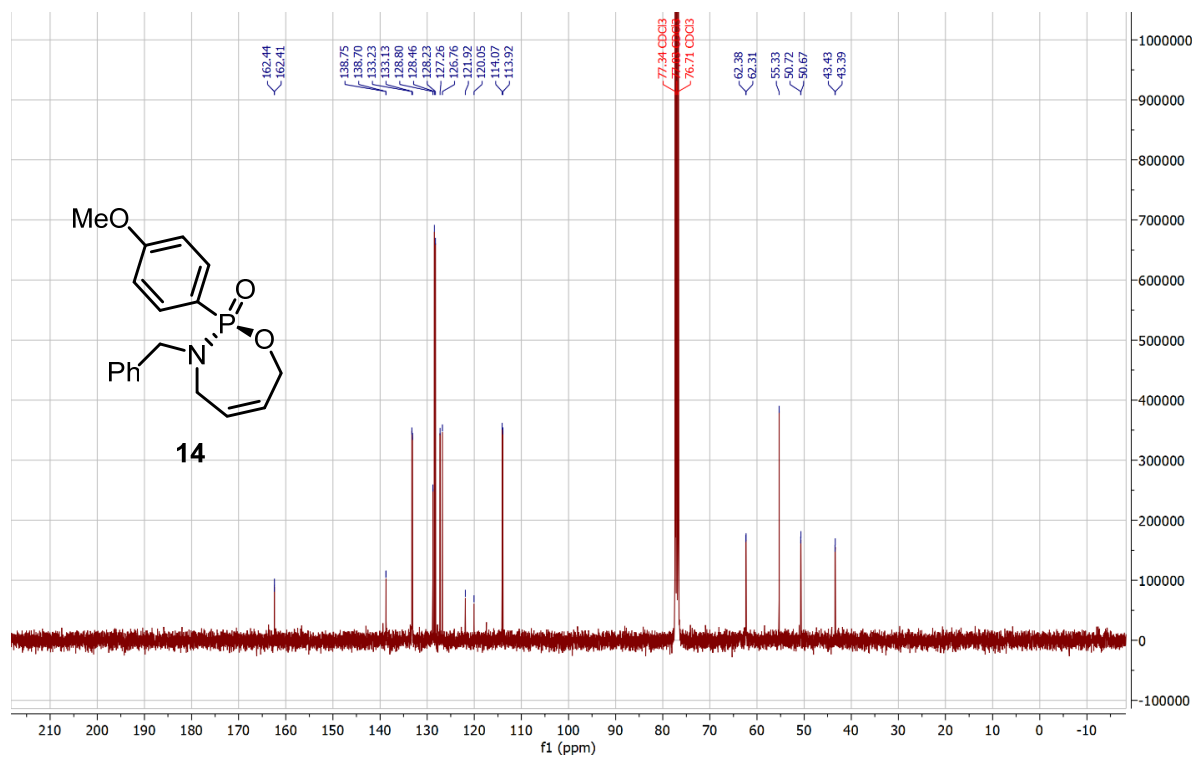



$^{31}\text{P}$  NMR

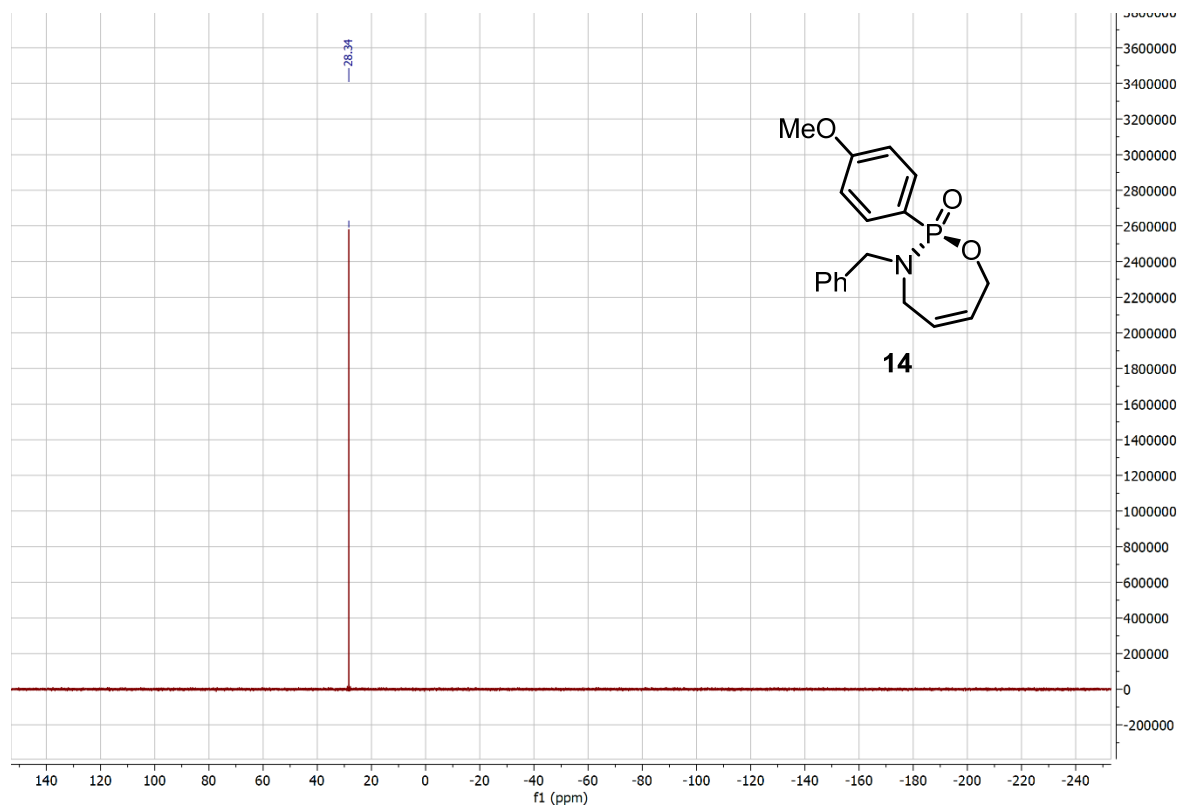

# <sup>1</sup>H NMR

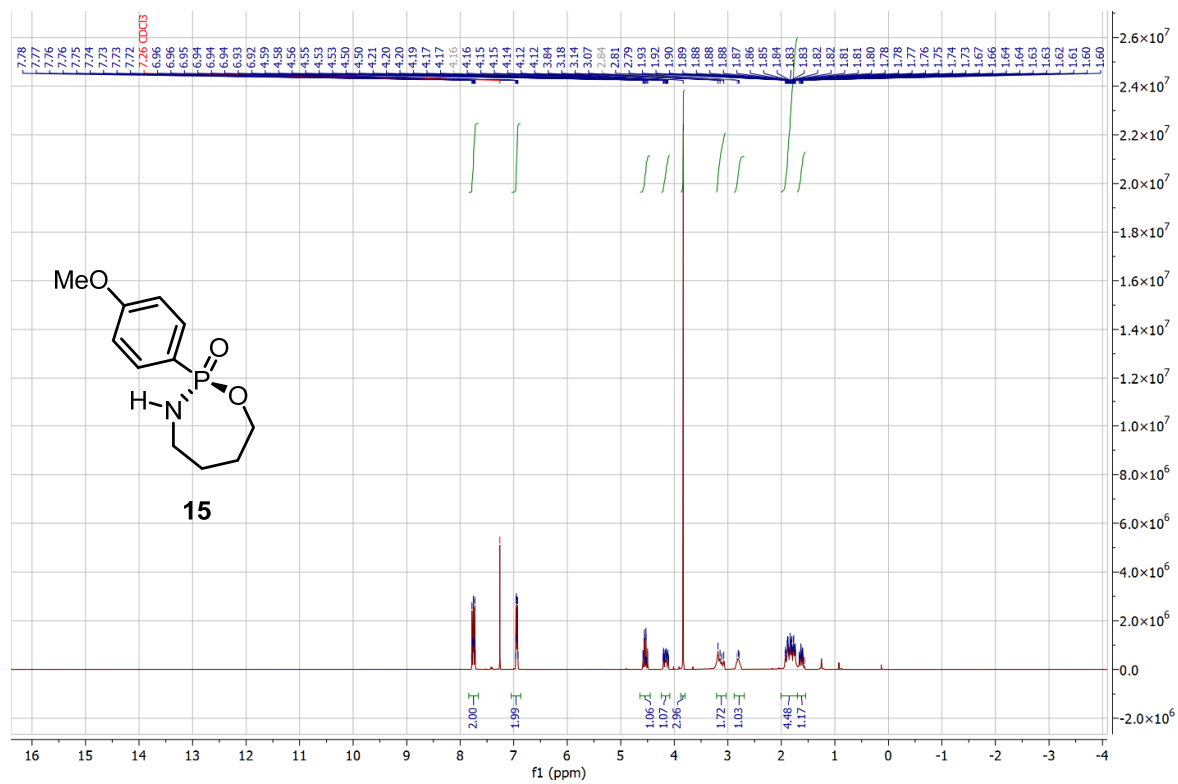

# <sup>13</sup>C NMR

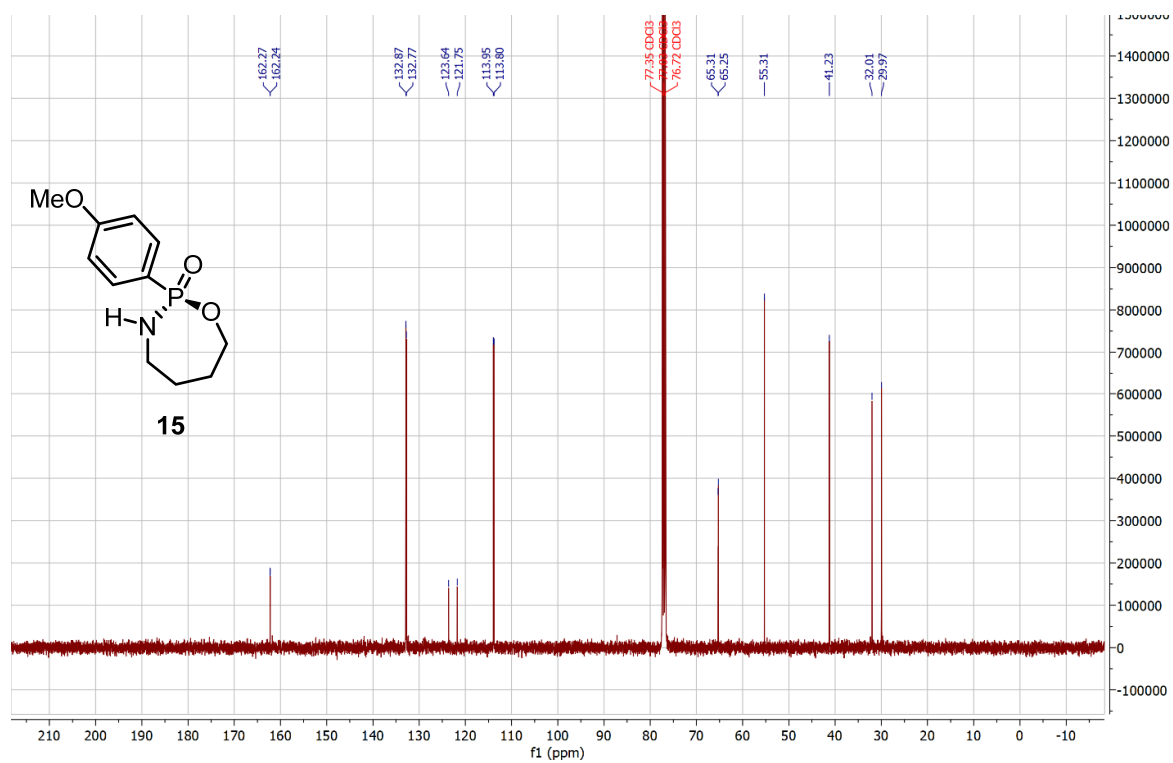

$^{31}\text{P}$  NMR

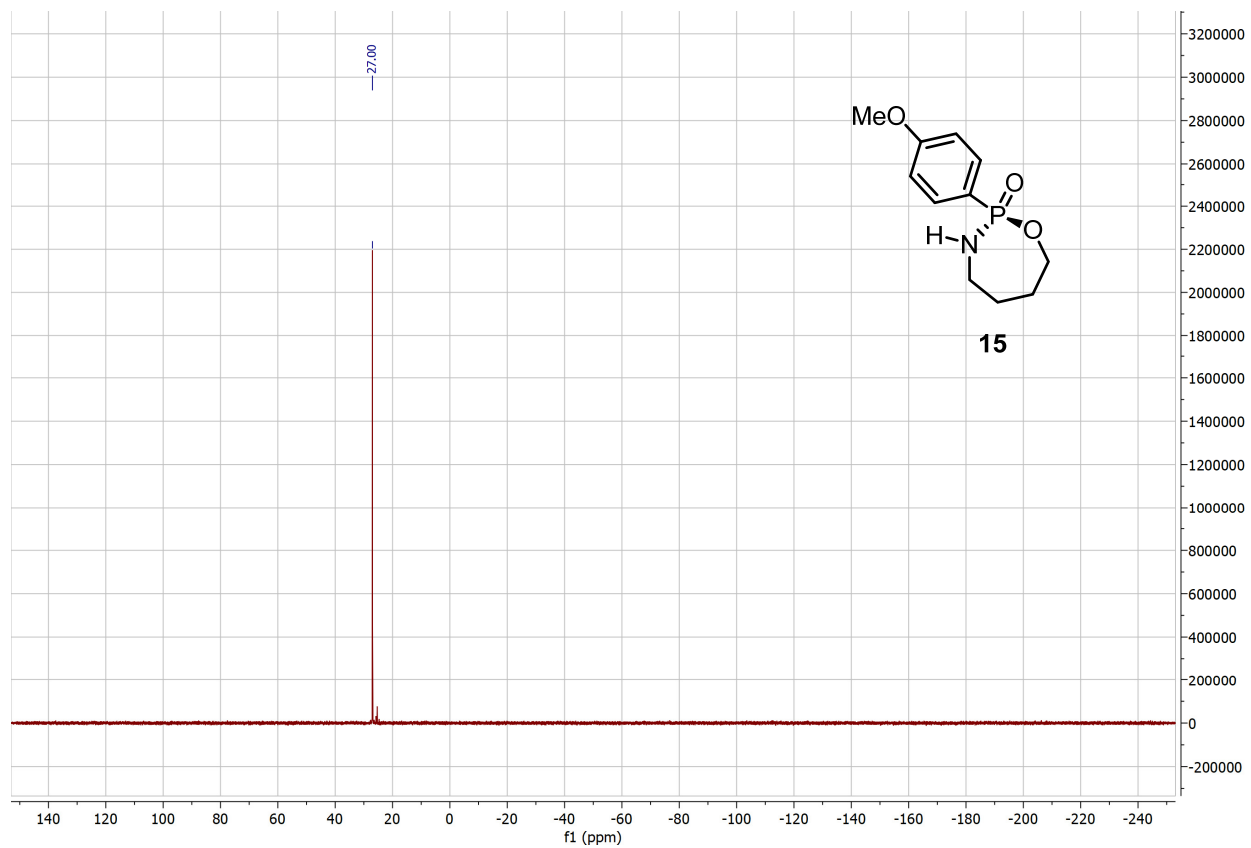



$^{31}\text{P}$  NMR

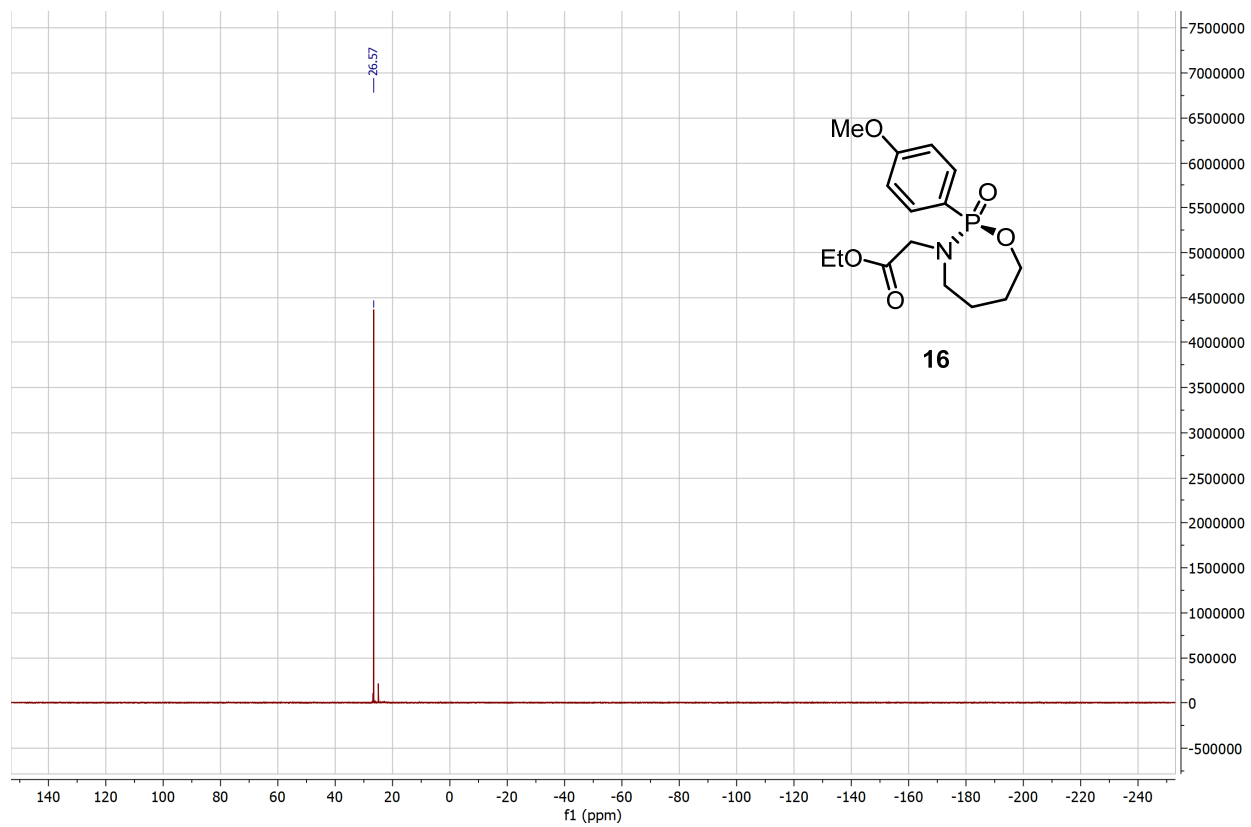

# <sup>1</sup>H NMR

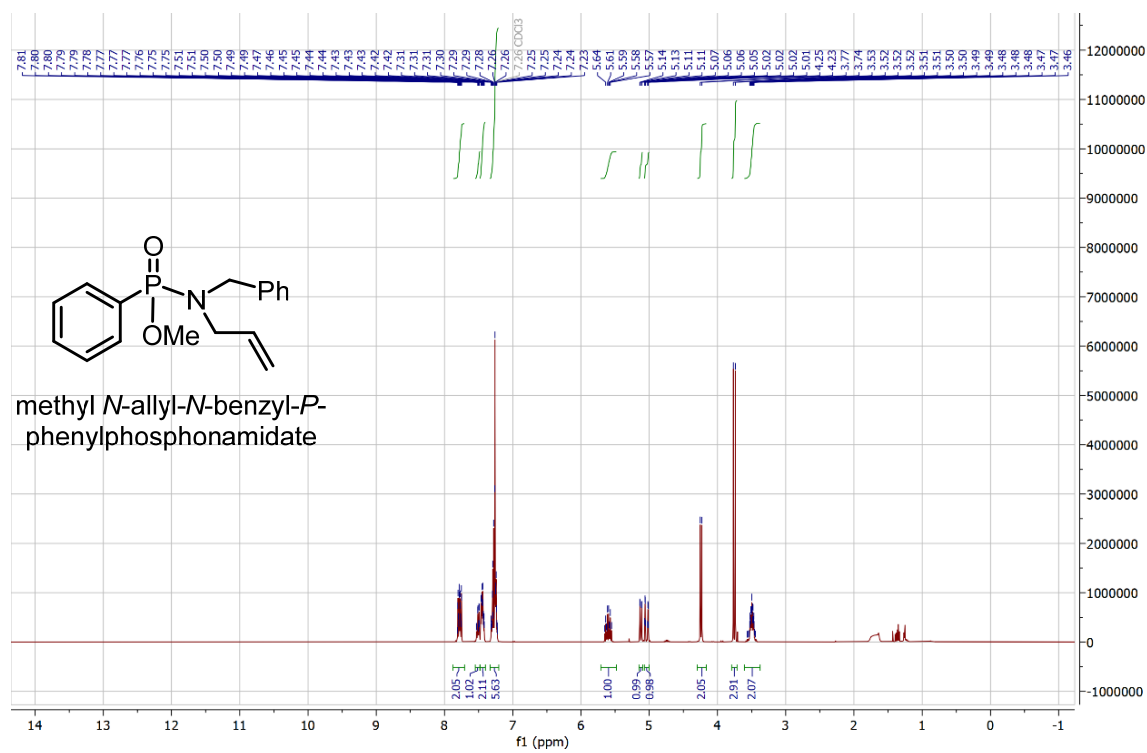

# <sup>13</sup>C NMR

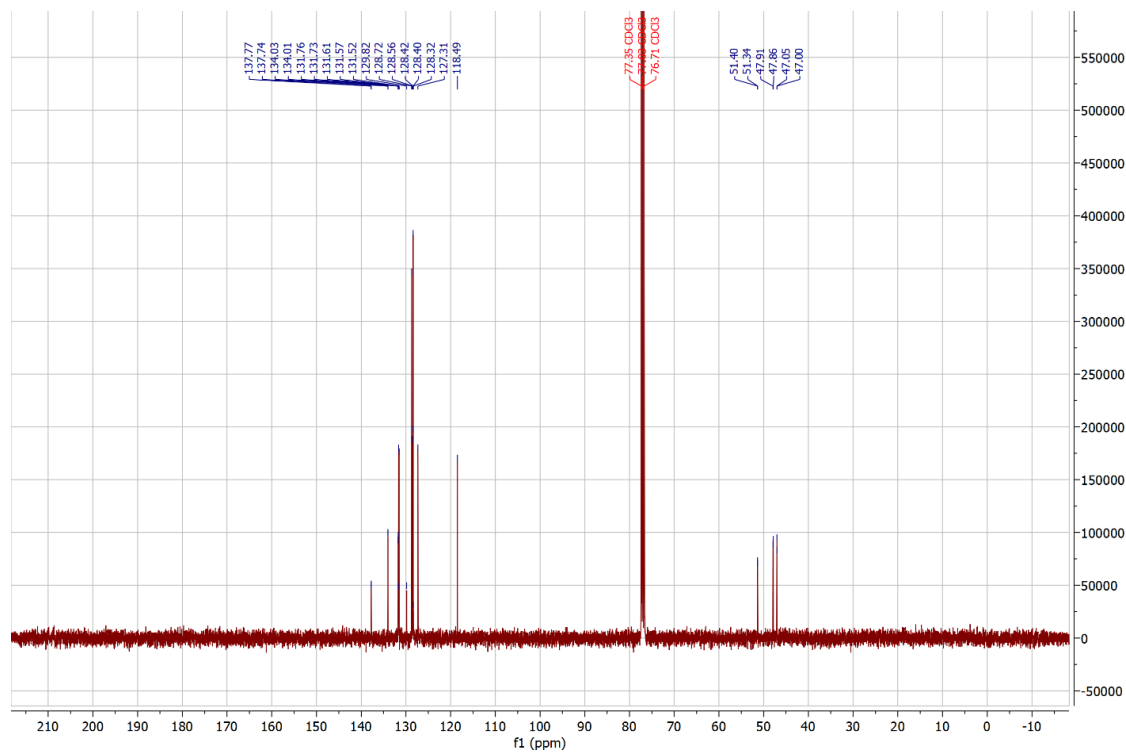

$^{31}\text{P}$  NMR

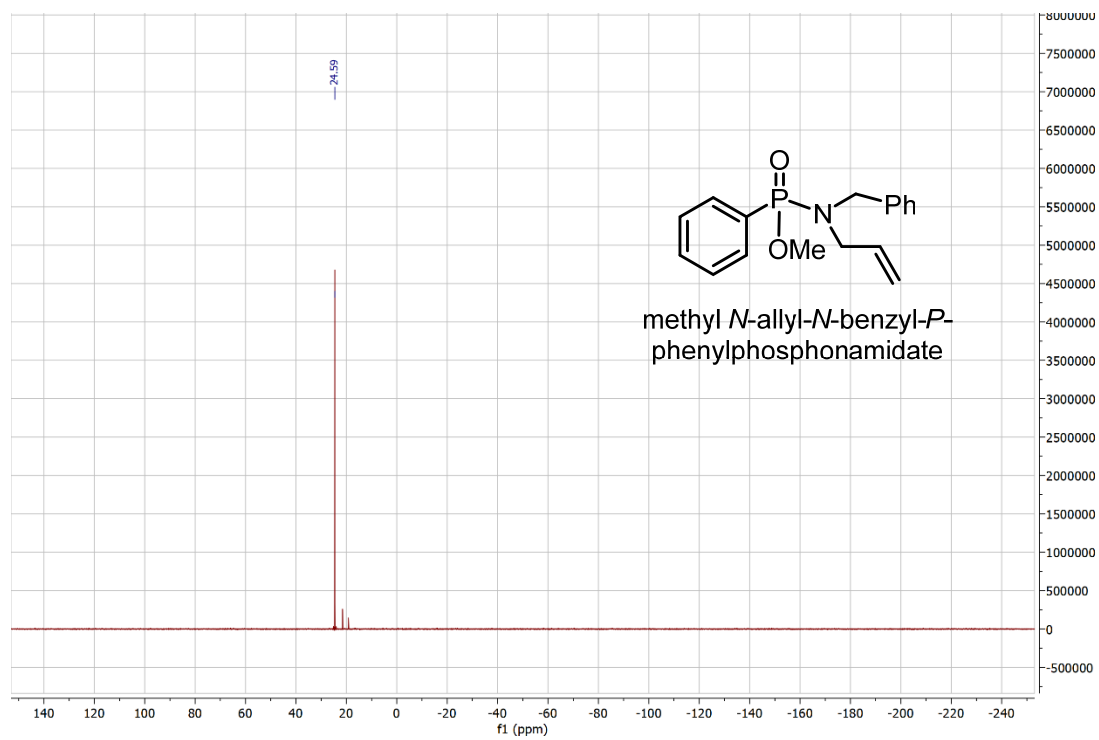





$^{31}\text{P}$  NMR

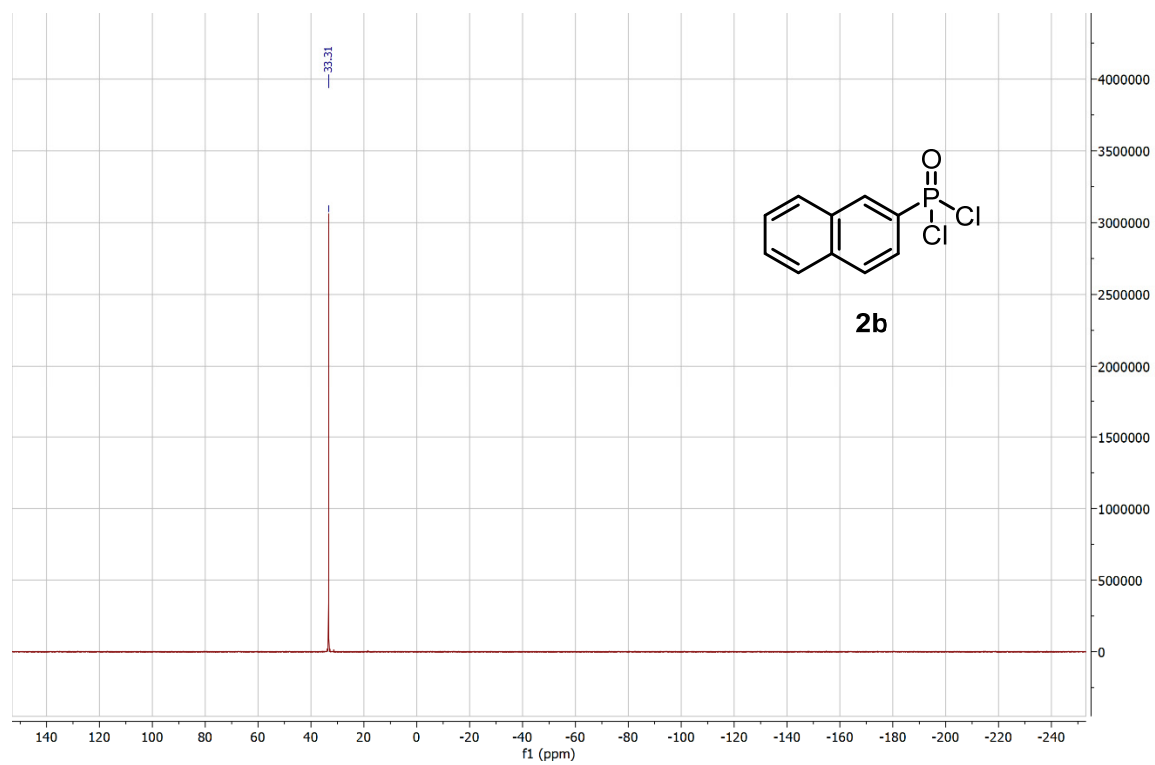

# <sup>1</sup>H NMR

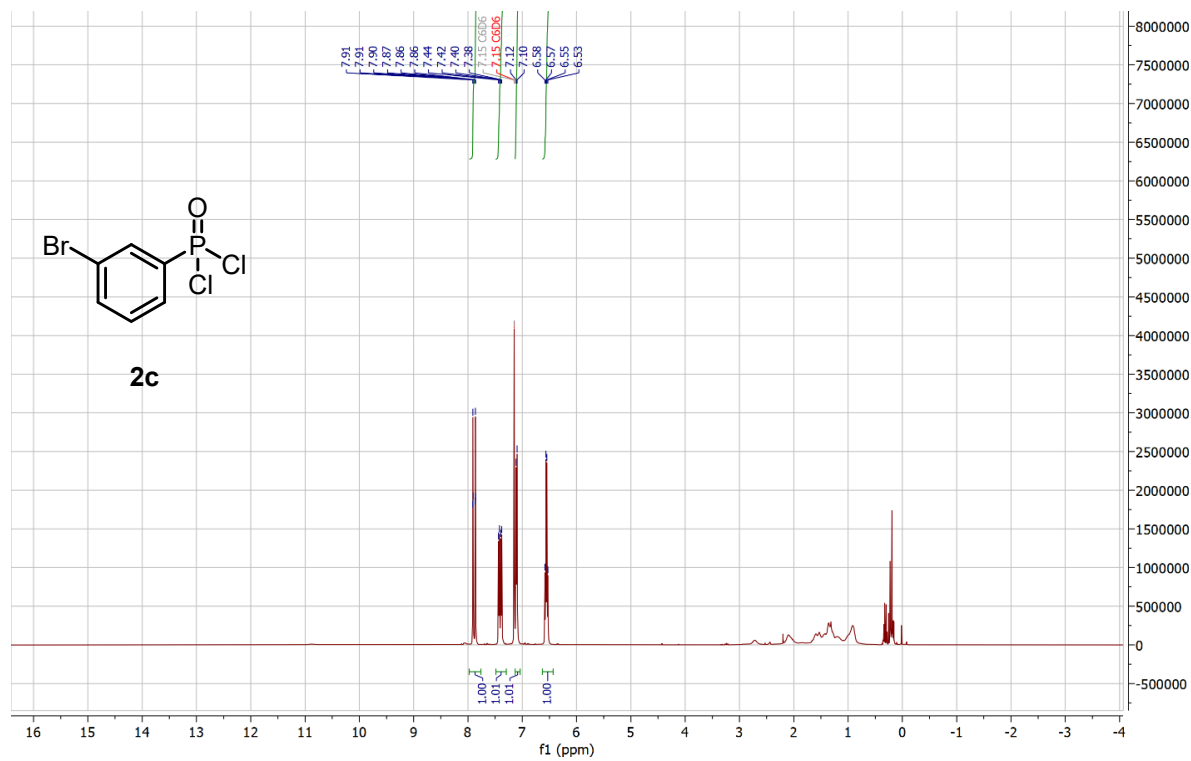

# <sup>13</sup>C NMR

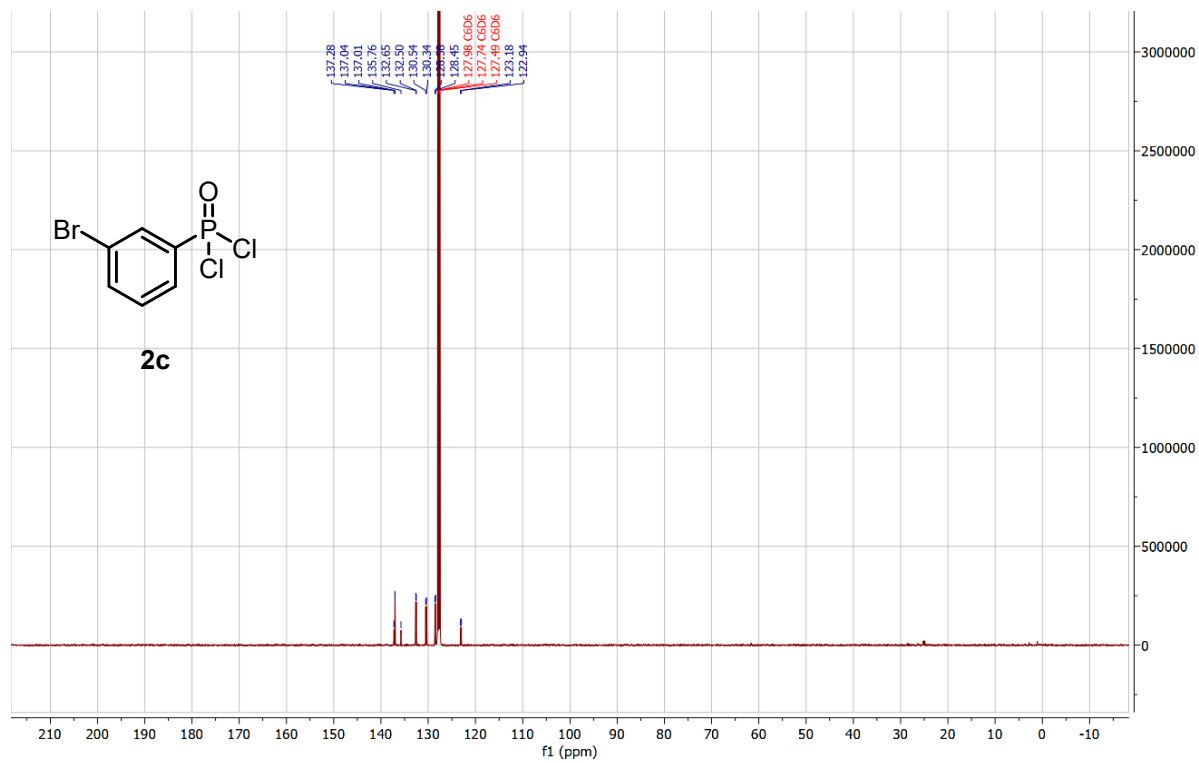

$^{31}\text{P}$  NMR

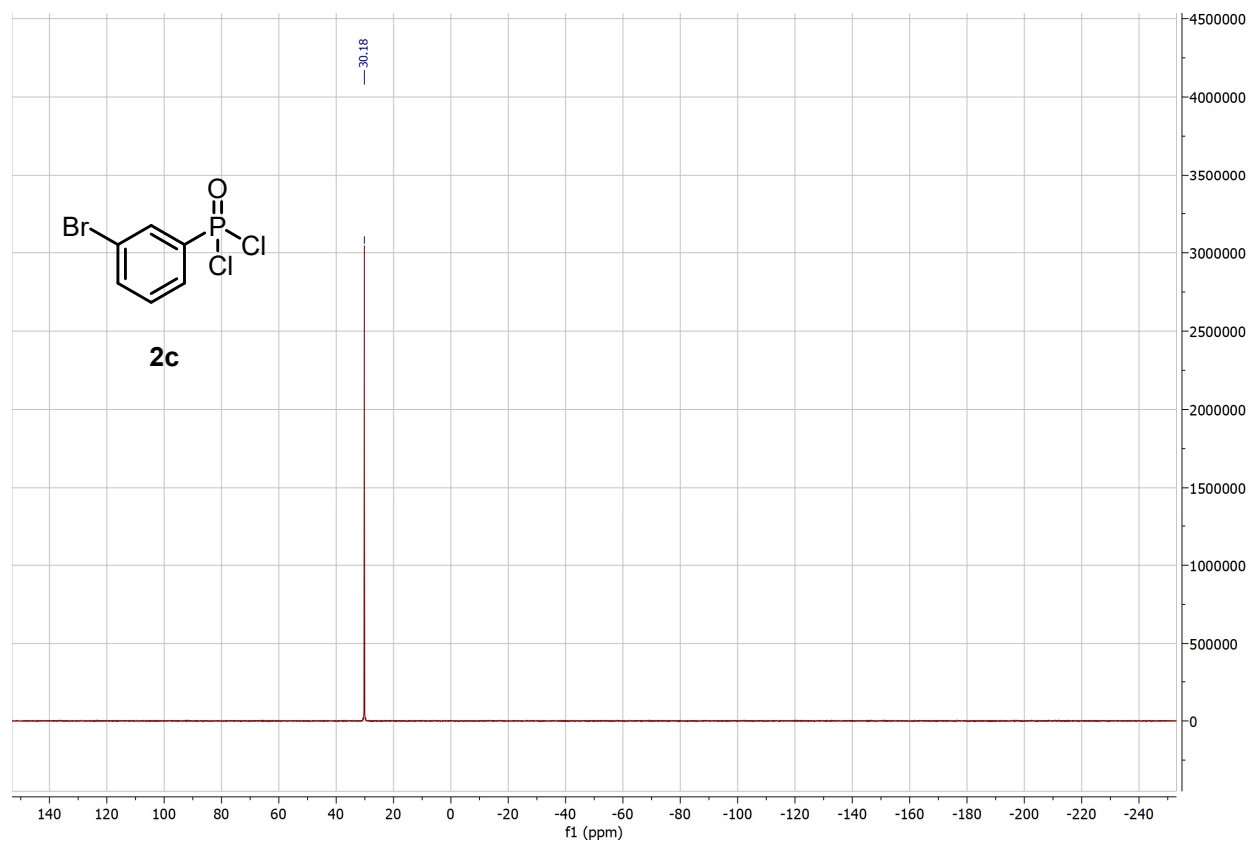

# <sup>1</sup>H NMR

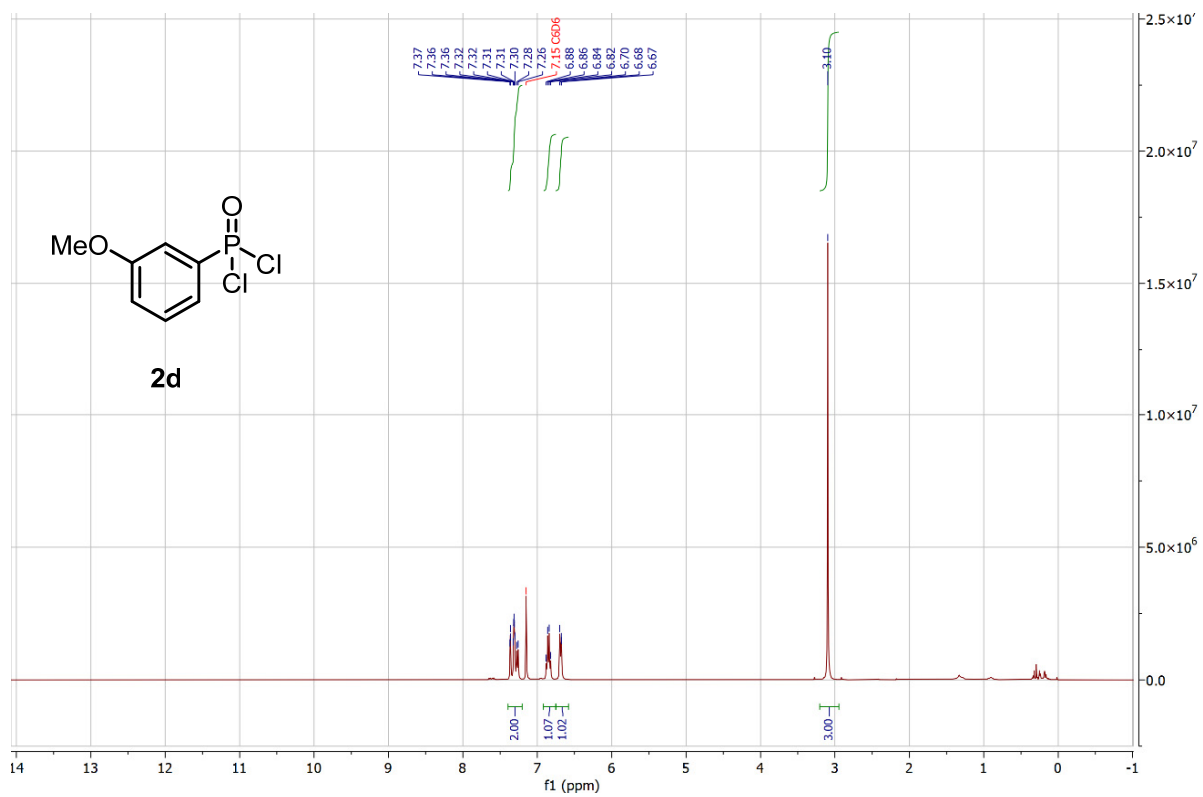

# <sup>13</sup>C NMR

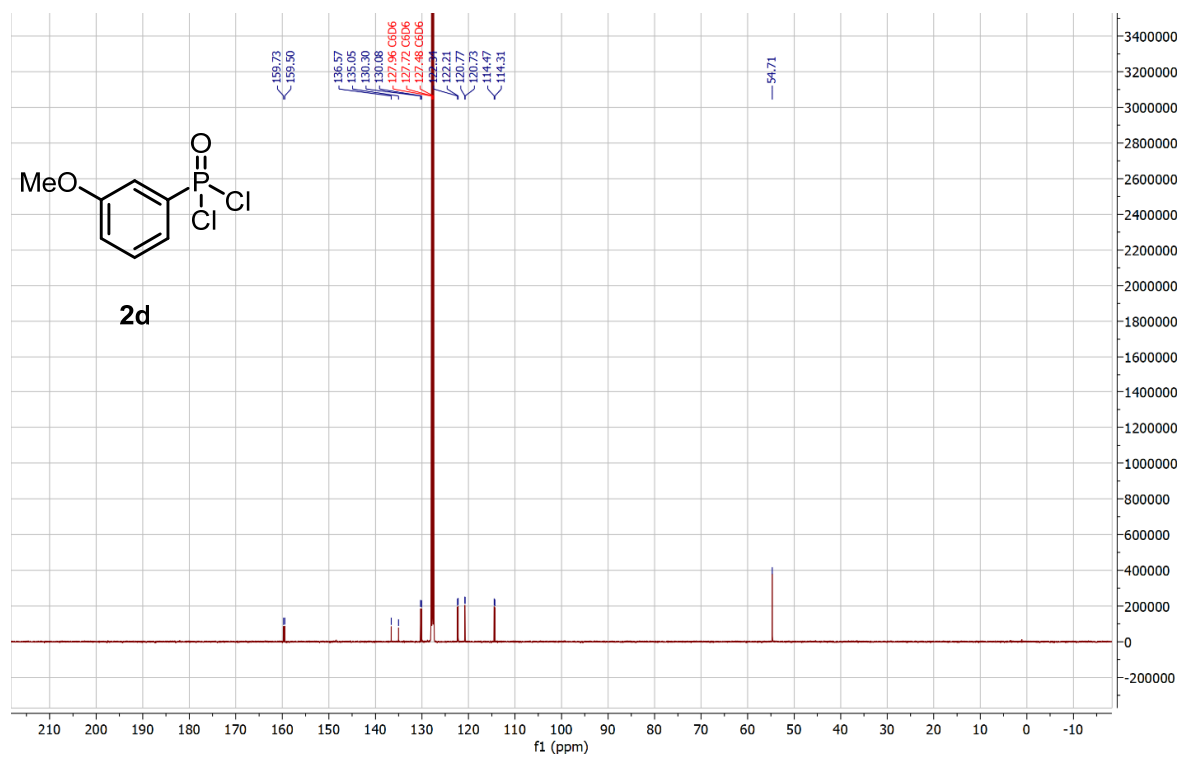

$^{31}\text{P}$  NMR

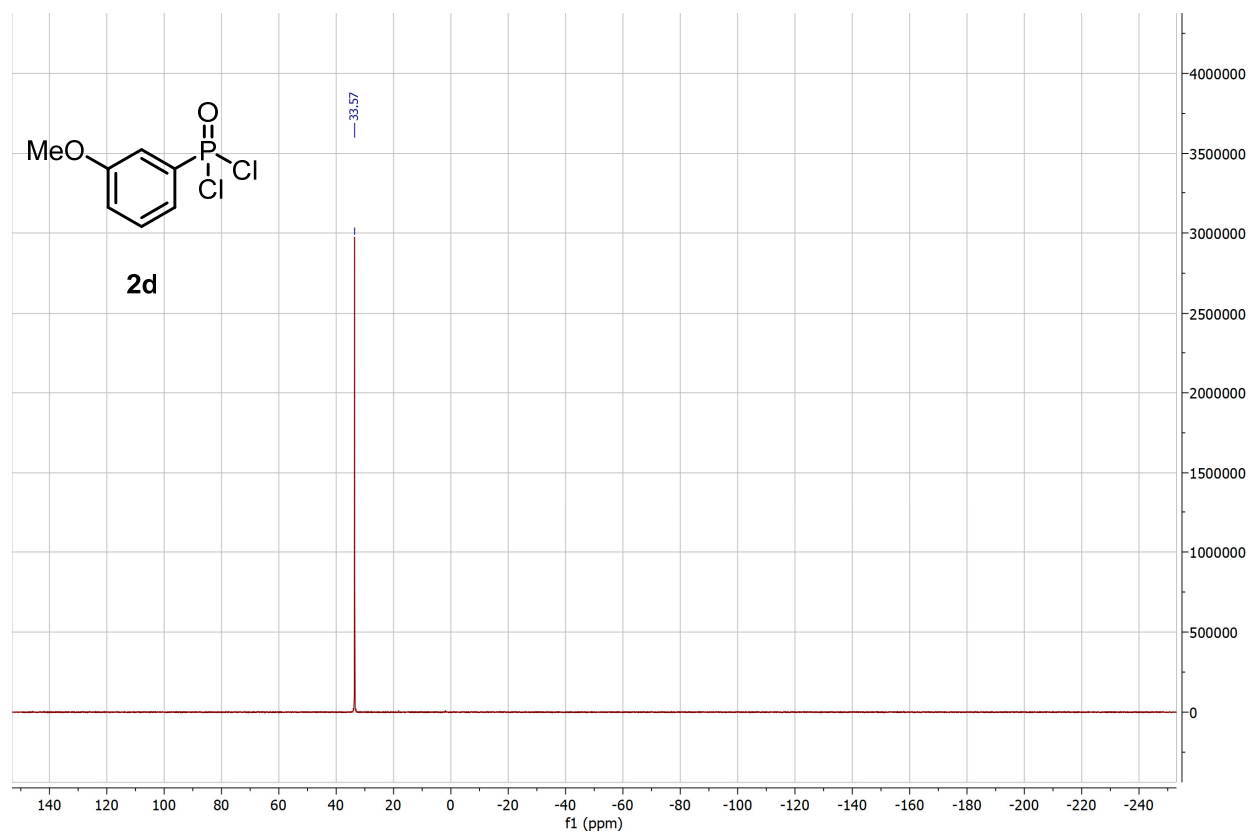

<sup>1</sup>H NMR

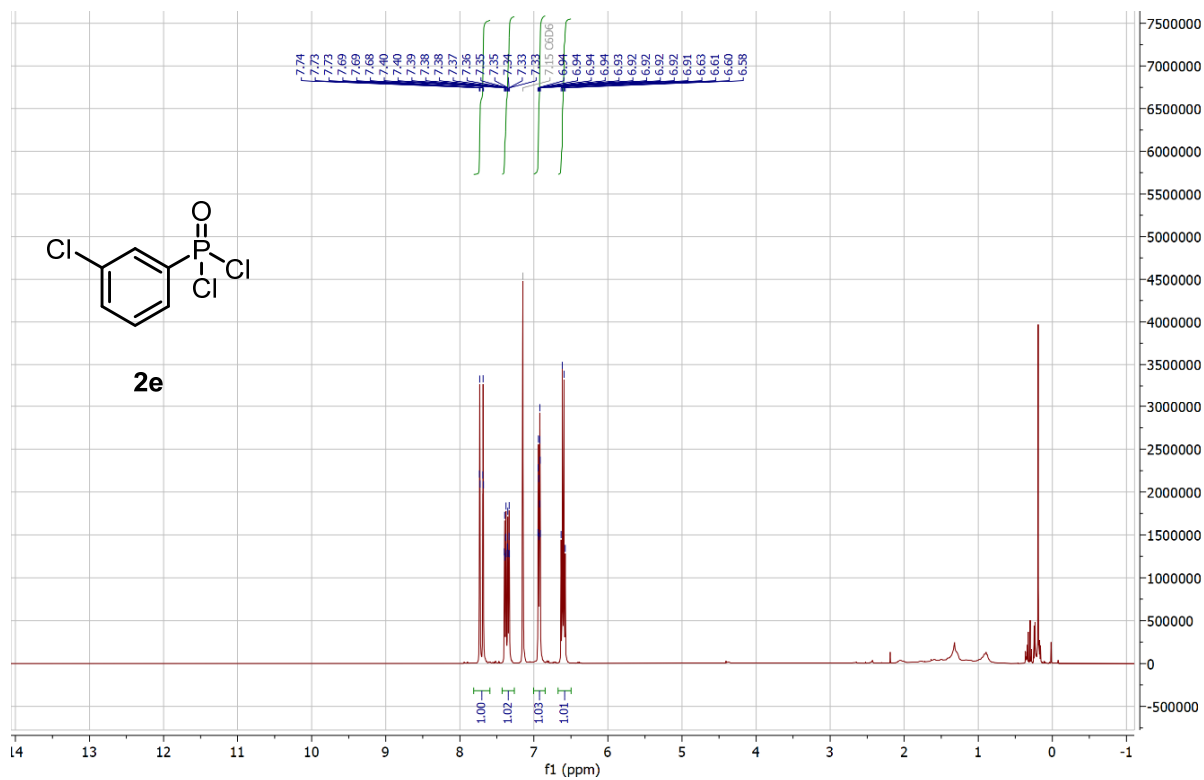

<sup>13</sup>C NMR

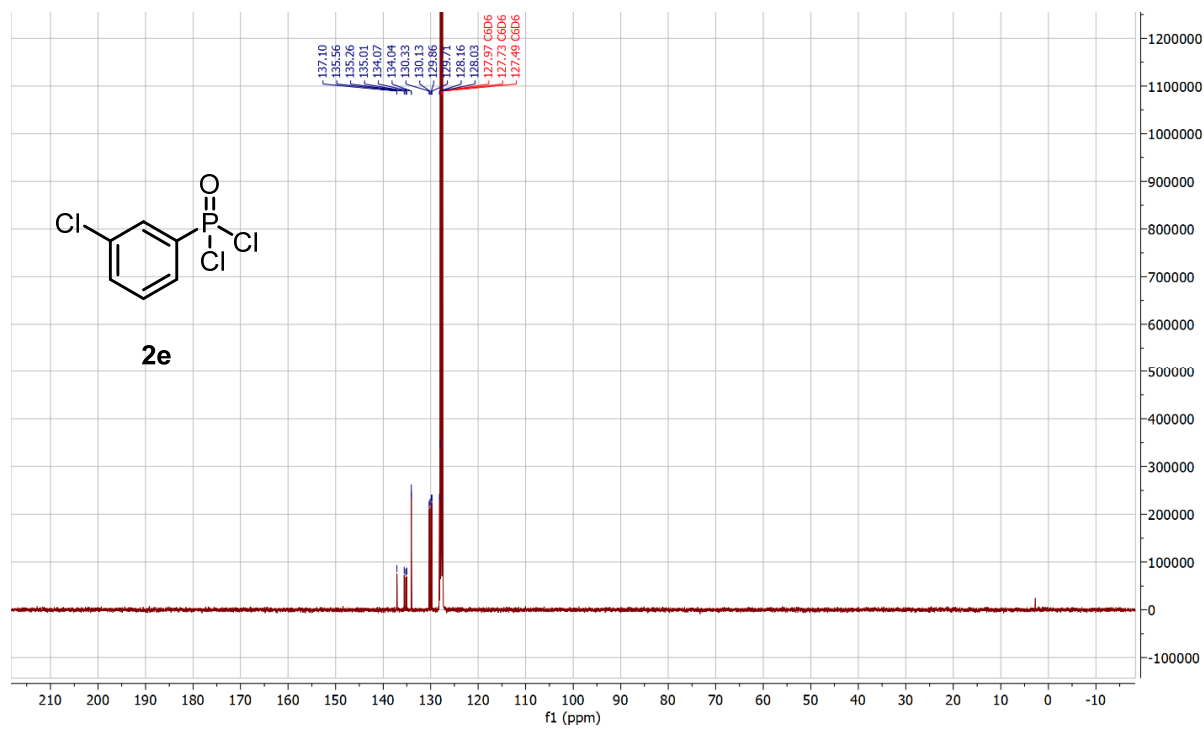

$^{31}\text{P}$  NMR

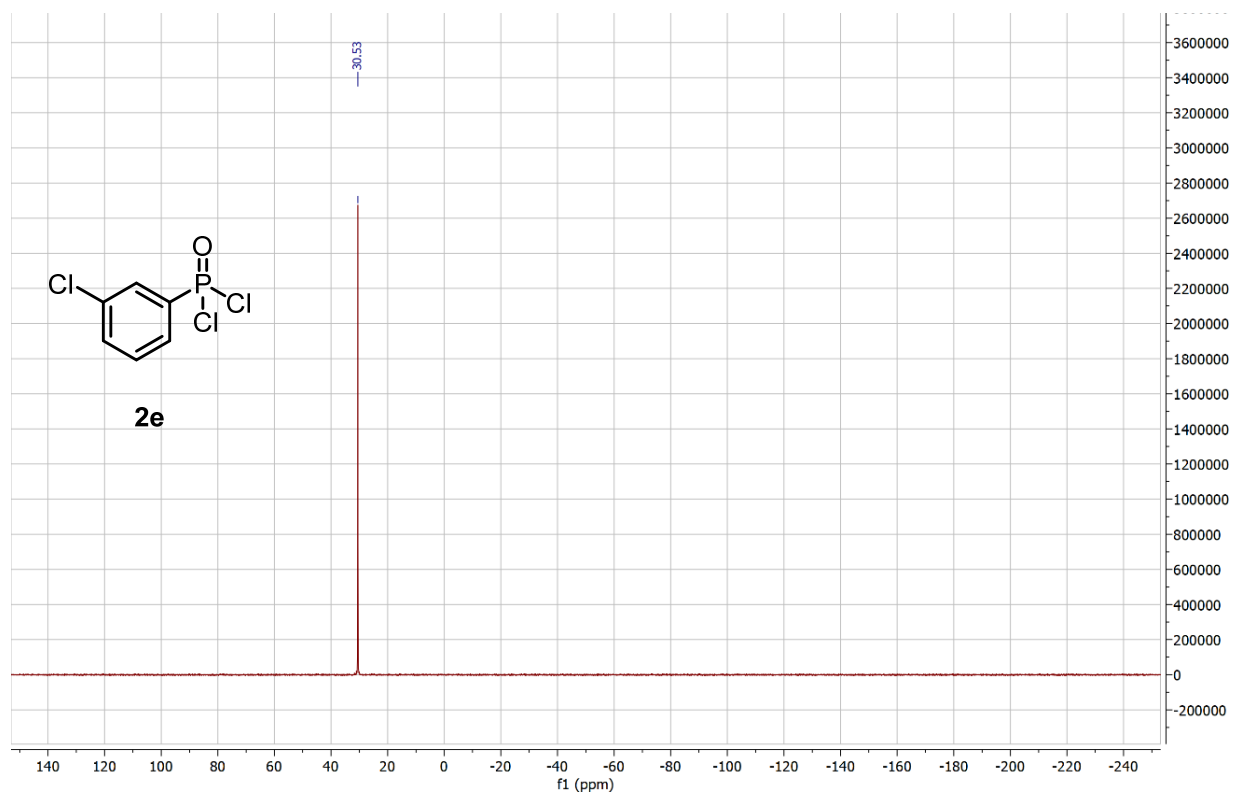

<sup>1</sup>H NMR

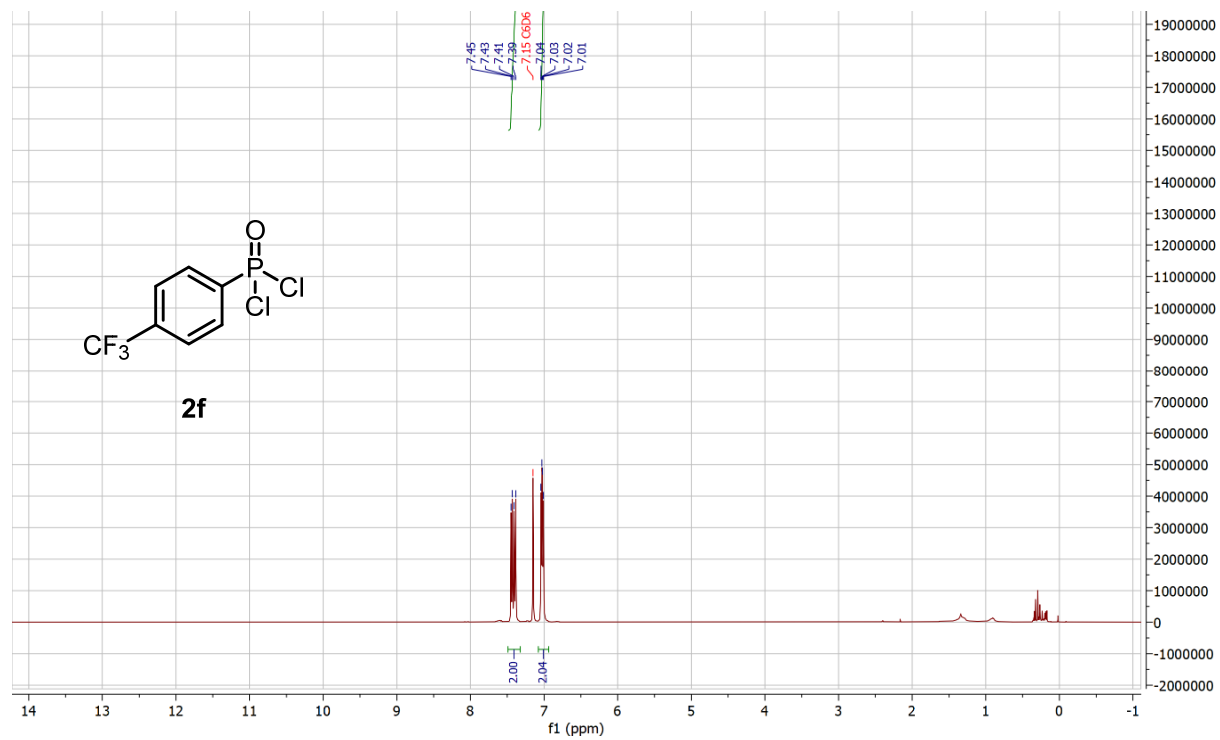

<sup>13</sup>C NMR

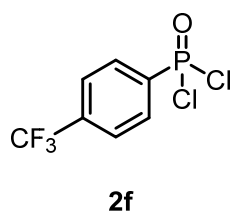



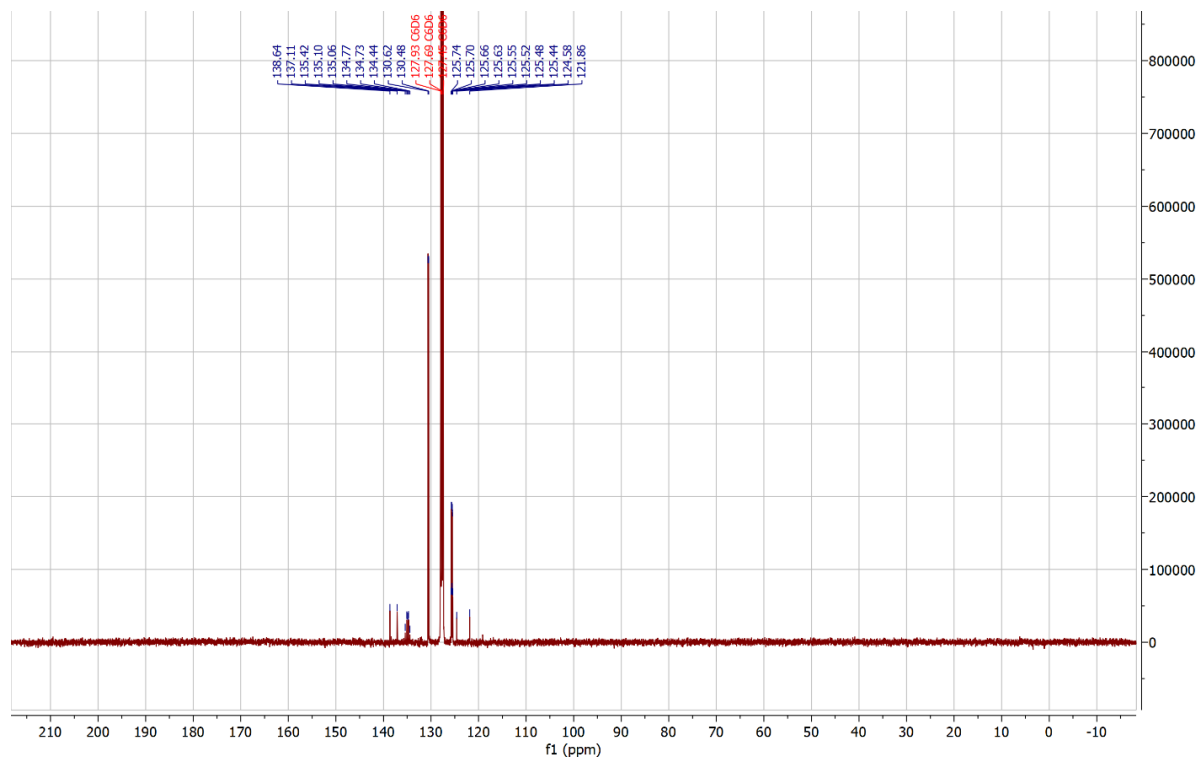

<sup>19</sup>F NMR

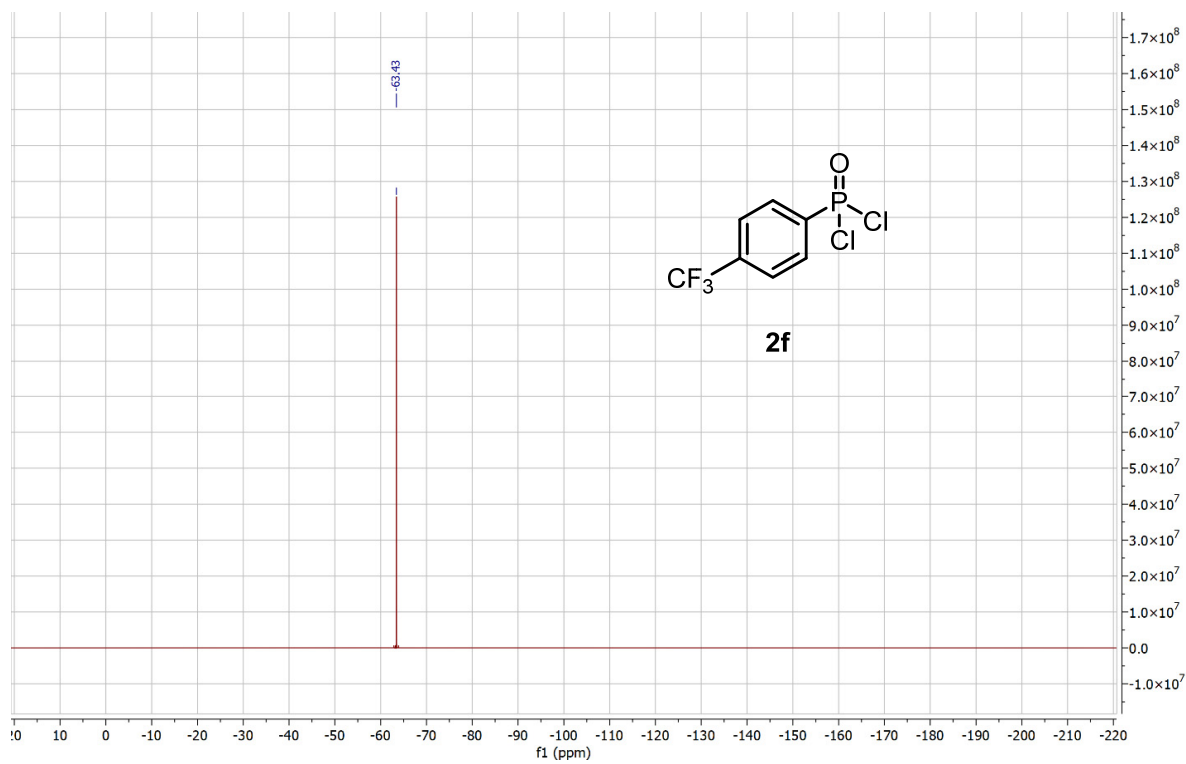

<sup>31</sup>P NMR

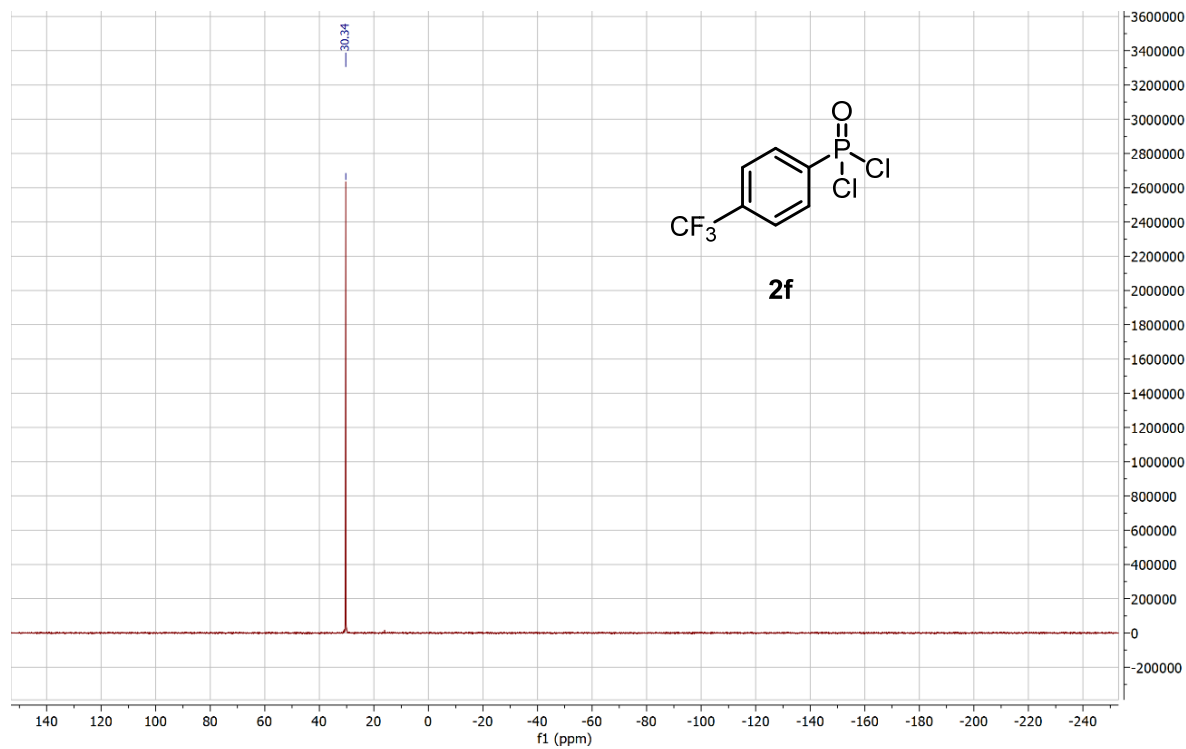

<sup>1</sup>H NMR

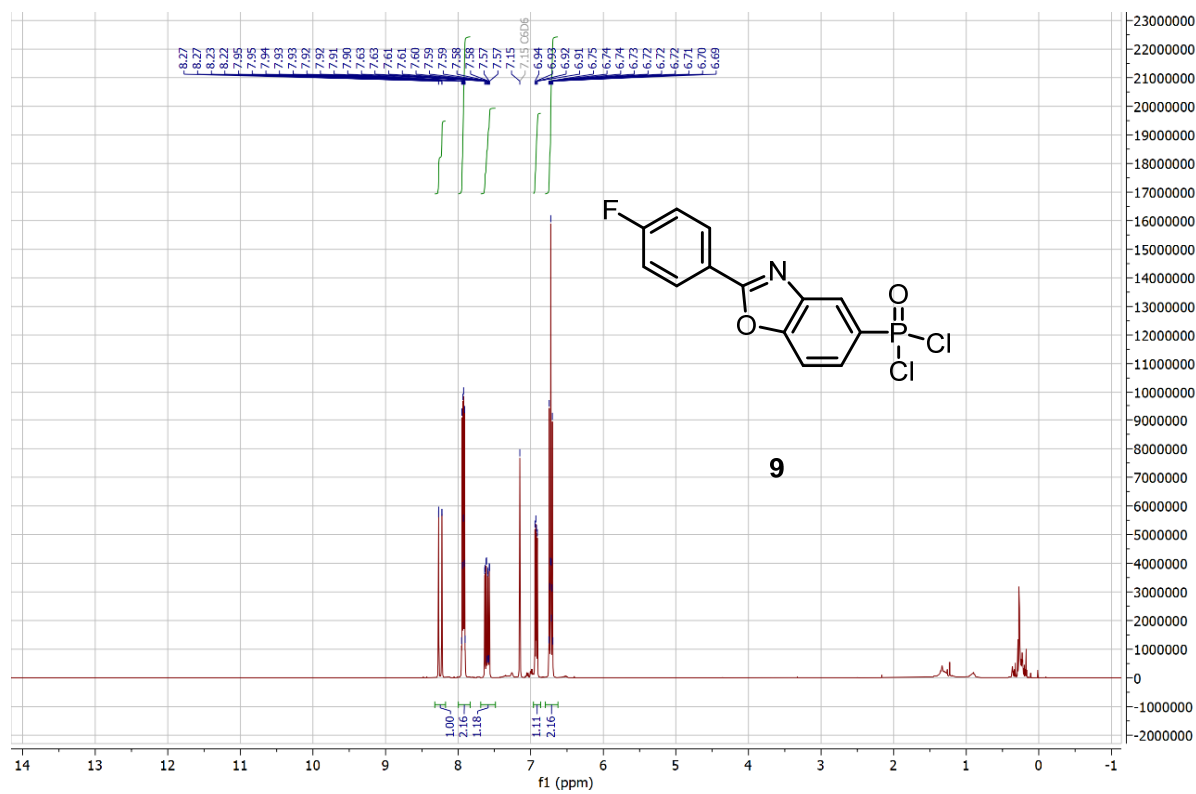

<sup>13</sup>C NMR

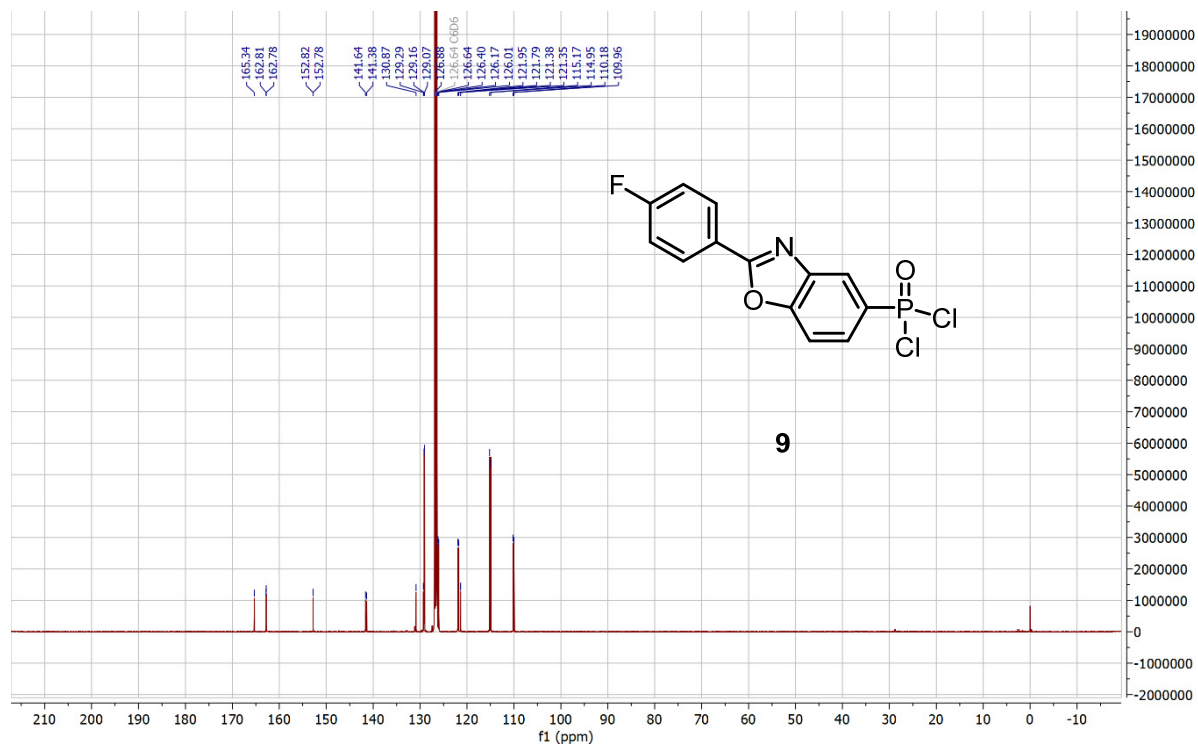

<sup>19</sup>F NMR

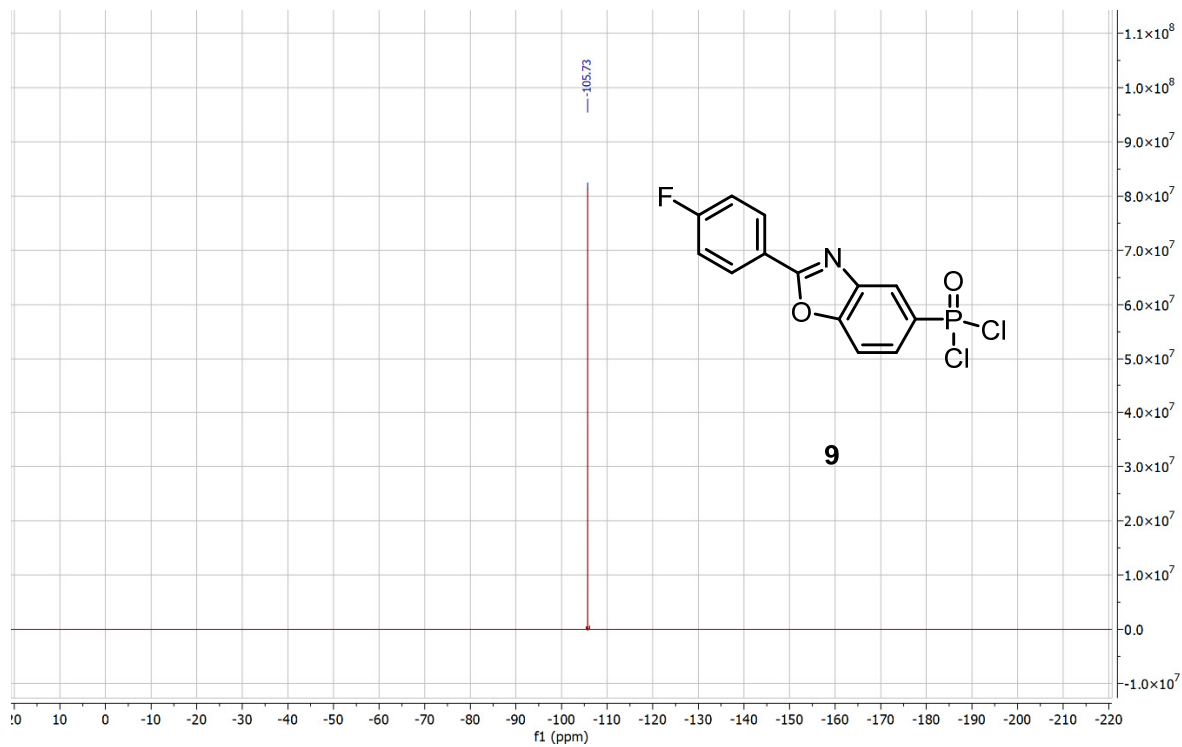

<sup>31</sup>P NMR

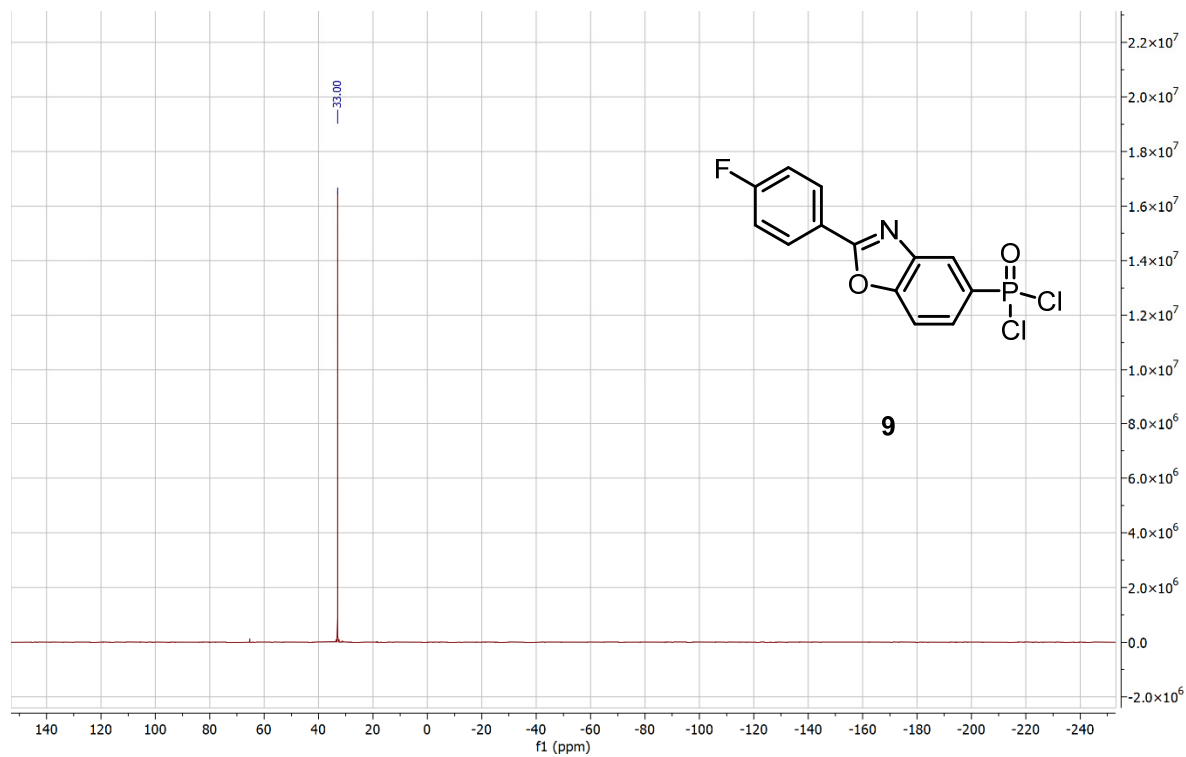

S220

## References

1. U. Pradere, E. C. Garnier-Amblard, S. J. Coats, F. Amblard, R. F. Schinazi, Synthesis of Nucleoside Phosphate and Phosphonate Prodrugs. *Chem. Rev.* **114**, 9154–9218 (2014).
2. M. D. Sørensen, L. K. A. Blæhr, M. K. Christensen, T. Høyer, S. Latini, P.-J. V. Hjarnaa, F. Björkling, Cyclic phosphinamides and phosphonamides, novel series of potent matrix metalloproteinase inhibitors with antitumour activity. *Bioorg. Med. Chem.* **11**, 5461–5484 (2003).
3. M. Sawa, T. Kiyoi, K. Kurokawa, H. Kumihara, M. Yamamoto, T. Miyasaka, Y. Ito, R. Hirayama, T. Inoue, Y. Kirii, E. Nishiwaki, H. Ohmoto, Y. Maeda, E. Ishibushi, Y. Inoue, K. Yoshino, H. Kondo, New Type of Metalloproteinase Inhibitor: Design and Synthesis of New Phosphonamide-Based Hydroxamic Acids. *J. Med. Chem.* **45**, 919–929 (2002).
4. A. Babbs, A. Berg, M. Chatzopoulou, K. E. Davies, S. G. Davies, B. Edwards, D. J. Elsey, E. Emer, A. L. A. Figuccia, A. M. Fletcher, S. Guiraud, S. Harriman, L. Moir, N. Robinson, J. A. Rowley, A. J. Russell, S. E. Squire, J. E. Thomson, J. M. Tinsley, F. X. Wilson, G. M. Wynne, Synthesis of SMT022357 enantiomers and in vivo evaluation in a Duchenne muscular dystrophy mouse model. *Tetrahedron.* **76**, 130819 (2020).
5. A. Nocentini, V. Alterio, S. Bua, L. Micheli, D. Esposito, M. Buonanno, G. Bartolucci, S. M. Osman, Z. A. ALOthman, R. Cirilli, M. Pierini, S. M. Monti, L. Di Cesare Mannelli, P. Gratteri, C. Ghelardini, G. De Simone, C. T. Supuran, Phenyl(thio)phosphon(amid)ate Benzenesulfonamides as Potent and Selective Inhibitors of Human Carbonic Anhydrases II and VII Counteract Allodynia in a Mouse Model of Oxaliplatin-Induced Neuropathy. *J. Med. Chem.* **63**, 5185–5200 (2020).
6. A. Nocentini, P. Gratteri, C. T. Supuran, Phosphorus versus Sulfur: Discovery of Benzenephosphonamidates as Versatile Sulfonamide-Mimic Chemotypes Acting as Carbonic Anhydrase Inhibitors. *Chem. – Eur. J.* **25**, 1188–1192 (2019).
7. W. A. Lee, G.-X. He, E. Eisenberg, T. Cihlar, S. Swaminathan, A. Mulato, K. C. Cundy, Selective intracellular activation of a novel prodrug of the human immunodeficiency virus reverse transcriptase inhibitor tenofovir leads to preferential distribution and accumulation in lymphatic tissue. *Antimicrob. Agents Chemother.* **49**, 1898–1906 (2005).
8. T. Imamoto, Synthesis and applications of high-performance P-chiral phosphine ligands. *Proc. Jpn. Acad. Ser. B Phys. Biol. Sci.* **97**, 520–542 (2021).
9. M. Dutartre, J. Bayardon, S. Jugé, Applications and stereoselective syntheses of P-chirogenic phosphorus compounds. *Chem. Soc. Rev.* **45**, 5771–5794 (2016).

10. O. I. Kolodiazhnyi, Phosphorus Compounds of Natural Origin: Prebiotic, Stereochemistry, Application. *Symmetry*. **13**, 889 (2021).
11. O. I. Kolodiazhnyi, A. Kolodiazhna, Nucleophilic substitution at phosphorus: stereochemistry and mechanisms. *Tetrahedron Asymmetry*. **28**, 1651–1674 (2017).
12. O. I. Kolodiazhnyi, Recent developments in the asymmetric synthesis of P-chiral phosphorus compounds. *Tetrahedron Asymmetry*. **23**, 1–46 (2012).
13. X. Ye, L. Peng, X. Bao, C.-H. Tan, H. Wang, Recent developments in highly efficient construction of P-stereogenic centers. *Green Synth. Catal.* **2**, 6–18 (2021).
14. S. Jugé, J. P. Genet, Asymmetric synthesis of phosphinates, phosphine oxides and phosphines by Michaelis Arbusov rearrangement of chiral oxazaphospholidine. *Tetrahedron Lett.* **30**, 2783–2786 (1989).
15. S. Jugé, M. Stephan, J. A. Laffitte, J. P. Genet, Efficient asymmetric synthesis of optically pure tertiary mono and diphosphine ligands. *Tetrahedron Lett.* **31**, 6357–6360 (1990).
16. T. Koizumi, R. Yanada(nee Ishizaka), H. Takagi, H. Hirai, E. Yoshii, Grignard reaction of 2-phenyl-tetrahydropyrrolo-1,5,2-oxazaphospholes, observation of the stereospecific inversion of configuration. *Tetrahedron Lett.* **22**, 571–572 (1981).
17. Z. S. Han, N. Goyal, M. A. Herbage, J. D. Sieber, B. Qu, Y. Xu, Z. Li, J. T. Reeves, J.-N. Desrosiers, S. Ma, N. Grinberg, H. Lee, H. P. R. Mangunuru, Y. Zhang, D. Krishnamurthy, B. Z. Lu, J. J. Song, G. Wang, C. H. Senanayake, Efficient Asymmetric Synthesis of P-Chiral Phosphine Oxides via Properly Designed and Activated Benzoxazaphosphinine-2-oxide Agents. *J. Am. Chem. Soc.* **135**, 2474–2477 (2013).
18. E. J. Corey, Z. Chen, G. J. Tanoury, A new and highly enantioselective synthetic route to P-chiral phosphines and diphosphines. *J. Am. Chem. Soc.* **115**, 11000–11001 (1993).
19. K. W. Knouse, J. N. deGruyter, M. A. Schmidt, B. Zheng, J. C. Vantourout, C. Kingston, S. E. Mercer, I. M. McDonald, R. E. Olson, Y. Zhu, C. Hang, J. Zhu, C. Yuan, Q. Wang, P. Park, M. D. Eastgate, P. S. Baran, Unlocking P(V): Reagents for chiral phosphorothioate synthesis. *Science*. **361**, 1234–1238 (2018).
20. D. Xu, N. Rivas-Bascón, N. M. Padial, K. W. Knouse, B. Zheng, J. C. Vantourout, M. A. Schmidt, M. D. Eastgate, P. S. Baran, Enantiodivergent Formation of C–P Bonds: Synthesis of P-Chiral Phosphines and Methylphosphonate Oligonucleotides. *J. Am. Chem. Soc.* **142**, 5785–5792 (2020).
21. K. Kuwabara, Y. Maekawa, M. Minoura, T. Maruyama, T. Murai, Chemoselective and Stereoselective Alcoholysis of Binaphthyl Phosphonothioates: Straightforward Access to Both Stereoisomers of Biologically Relevant P -Stereogenic Phosphonothioates. *J. Org. Chem.* **85**, 14446–14455 (2020).

22. A. Mondal, N. O. Thiel, R. Dorel, B. L. Feringa, P-chirogenic phosphorus compounds by stereoselective Pd-catalysed arylation of phosphoramidites. *Nat. Catal.* **5**, 10–19 (2021).
23. D. A. DiRocco, Y. Ji, E. C. Sherer, A. Klapars, M. Reibarkh, J. Dropinski, R. Mathew, P. Maligres, A. M. Hyde, J. Limanto, A. Brunskill, R. T. Ruck, L.-C. Campeau, I. W. Davies, A multifunctional catalyst that stereoselectively assembles prodrugs. *Science*. **356**, 426–430 (2017).
24. A. L. Featherston, Y. Kwon, M. M. Pompeo, O. D. Engl, D. K. Leahy, S. J. Miller, Catalytic asymmetric and stereodivergent oligonucleotide synthesis. *Science*. **371**, 702–707 (2021).
25. M. Formica, T. Rogova, H. Shi, N. Sahara, A. J. M. Farley, K. E. Christensen, F. Duarte, D. J. Dixon, Catalytic Enantioselective Nucleophilic Desymmetrisation of Phosphonate Esters (2021), doi: 10.26434/chemrxiv-2021-5714s-v2.
26. C. Bauduin, D. Moulin, E. B. Kaloun, C. Darcel, S. Jugé, Highly Enantiomerically Enriched Chlorophosphine Boranes: Synthesis and Applications as P-Chirogenic Electrophilic Blocks. *J. Org. Chem.* **68**, 4293–4301 (2003).
27. T. Kimura, T. Murai, Enantiomerically pure P-chiral phosphinoselenoic chlorides: inversion of configuration at the P-chirogenic center in the synthesis and reaction of these substances. *Chem. Commun.*, 4077–4079 (2005).
28. T. Kimura, T. Murai, P-Chiral Phosphinoselenoic Chlorides and Optically Active P-Chiral Phosphinoselenoic Amides: Synthesis and Stereospecific Interconversion with Extrusion and Addition Reactions of the Selenium Atom. *Chem. Lett.* **33**, 878–879 (2004).
29. A. G. Doyle, E. N. Jacobsen, Small-Molecule H-Bond Donors in Asymmetric Catalysis. *Chem. Rev.* **107**, 5713–5743 (2007).
30. D. A. Kutateladze, D. A. Strassfeld, E. N. Jacobsen, Enantioselective Tail-to-Head Cyclizations Catalyzed by Dual-Hydrogen-Bond Donors. *J. Am. Chem. Soc.* **142**, 6951–6956 (2020).
31. A. J. Bendel-Smith, S. C. Kim, M. Wasa, S. P. Roche, E. N. Jacobsen, Enantioselective Synthesis of  $\alpha$ -Allyl Amino Esters via Hydrogen-Bond-Donor Catalysis. *J. Am. Chem. Soc.* **141**, 11414–11419 (2019).
32. D. D. Ford, D. Lehnerr, C. R. Kennedy, E. N. Jacobsen, Anion-Abstraction Catalysis: The Cooperative Mechanism of  $\alpha$ -Chloroether Activation by Dual Hydrogen-Bond Donors. *ACS Catal.* **6**, 4616–4620 (2016).
33. K. L. Tan, E. N. Jacobsen, Indium-Mediated Asymmetric Allylation of Acylhydrazones Using a Chiral Urea Catalyst. *Angew. Chem. Int. Ed.* **46**, 1315–1317 (2007).

34. H. Xu, S. J. Zuend, M. G. Woll, Y. Tao, E. N. Jacobsen, Asymmetric Cooperative Catalysis of Strong Brønsted Acid–Promoted Reactions Using Chiral Ureas. *Science*. **327**, 986–990 (2010).
35. D. A. Strassfeld, E. N. Jacobsen “The Aryl-Pyrrolidine-tert-Leucine Motif as a New Privileged Chiral Scaffold: The Role of Noncovalent Stabilizing Interactions” in *Supramolecular Catalysis: New Directions and Developments*, P.W.N.M. van Leeuwen, M. Raynal, Eds. (Wiley, 2022), chap. 25, pp. 361-385.
36. I. V. L. Wilkinson, K. J. Perkins, H. Dugdale, L. Moir, A. Vuorinen, M. Chatzopoulou, S. E. Squire, S. Monecke, A. Lomow, M. Geese, P. D. Charles, P. Burch, J. M. Tinsley, G. M. Wynne, S. G. Davies, F. X. Wilson, F. Rastinejad, S. Mohammed, K. E. Davies, A. J. Russell, Chemical Proteomics and Phenotypic Profiling Identifies the Aryl Hydrocarbon Receptor as a Molecular Target of the Utrophin Modulator Ezutromid. *Angew. Chem. Int. Ed.* **59**, 2420–2428 (2020).
37. A. Babbs, A. Berg, M. Chatzopoulou, K. E. Davies, S. G. Davies, B. Edwards, D. J. Elsey, E. Emer, S. Guiraud, S. Harriman, C. Lecci, L. Moir, D. Peters, N. Robinson, J. A. Rowley, A. J. Russell, S. E. Squire, J. M. Tinsley, F. X. Wilson, G. M. Wynne, 2-Arylbenzo[d]oxazole Phosphinate Esters as Second-Generation Modulators of Utrophin for the Treatment of Duchenne Muscular Dystrophy. *J. Med. Chem.* **63**, 7880–7891 (2020).
38. M. Chatzopoulou, E. Emer, C. Lecci, J. A. Rowley, A.-S. Casagrande, L. Moir, S. E. Squire, S. G. Davies, S. Harriman, G. M. Wynne, F. X. Wilson, K. E. Davies, A. J. Russell, Decreasing HepG2 Cytotoxicity by Lowering the Lipophilicity of Benzo[d]oxazolephosphinate Ester Utrophin Modulators. *ACS Med. Chem. Lett.* **11**, 2421–2427 (2020).
39. M. V. Overtveldt, T. S. A. Heugebaert, I. Verstraeten, D. Geelen, C. V. Stevens, Phosphoramidate pyrabactin analogues as abscisic acid agonists. *Org. Biomol. Chem.* **13**, 5260–5264 (2015).
40. M. Buti, M. Riveiro-Barciela, R. Esteban, Tenofovir Alafenamide Fumarate: A New Tenofovir Prodrug for the Treatment of Chronic Hepatitis B Infection. *J. Infect. Dis.* **216**, S792–S796 (2017).
41. M. Slusarczyk, M. Serpi, F. Pertusati, Phosphoramidates and phosphonamidates (ProTides) with antiviral activity. *Antivir. Chem. Chemother.* **26** (2018).
42. M.-A. Kasper, M. Glanz, A. Stengl, M. Penkert, S. Klenk, T. Sauer, D. Schumacher, J. Helma, E. Krause, M. C. Cardoso, H. Leonhardt, C. P. R. Hackenberger, Cysteine-Selective Phosphoramidate Electrophiles for Modular Protein Bioconjugations. *Angew. Chem. Int. Ed.* **58**, 11625–11630 (2019).



43. N. A. Lentini, B. J. Foust, C.-H. C. Hsiao, A. J. Wiemer, D. F. Wiemer, Phosphoramidate prodrugs of a butyrophilin ligand display plasma stability and potent V $\gamma$ 9V $\delta$ 2 T cell stimulation. *J. Med. Chem.* **61**, 8658–8669 (2018).
44. Z. Zhao, Q. Zhu, S. Che, Z. Luo, Y. Lian, Palladium/nickel-mediated cross coupling reaction between phosphorylamides and alkenes toward enephosphorylamides. *Synth. Commun.* **50**, 2338–2346 (2020).
45. J. Xiao, P. Li, Y. Zhang, D. Xie, Z. Peng, D. An, W. Dong, Cobalt-catalyzed oxidative arylmethylation of phosphorylamides. *Tetrahedron.* **74**, 4558–4568 (2018).
46. Y. Xu, Q. Su, W. Dong, Z. Peng, D. An, The Chan-Evans-Lam N-arylation of phosphonic/phosphinic amides. *Tetrahedron.* **73**, 4602–4609 (2017).
47. L. Zhong, Q. Su, J. Xiao, Z. Peng, W. Dong, Y. Zhang, D. An, Ligand-Free Copper-Catalyzed Arylation of Phosphoramides and Phosphinamides with Aryl Siloxanes. *Asian J. Org. Chem.* **6**, 1072–1079 (2017).
48. Q. Zhu, S. Che, Z. Luo, Z. Zhao, Ligand-free copper-catalyzed denitrogenative arylation of phosphorylamides with arylhydrazines. *Synth. Commun.* **50**, 947–957 (2020).
49. T. L. Schull, S. L. Brandow, W. J. Dressick, Synthesis of symmetrical triarylphosphines from aryl fluorides and red phosphorus: scope and limitations. *Tetrahedron Lett.* **42**, 5373–5376 (2001).
50. N. Ohmura, A. Nakamura, A. Hamasaki, M. Tokunaga, Hydrolytic Deallylation of N-Allyl Amides Catalyzed by PdII Complexes. *Eur. J. Org. Chem.* **2008**, 5042–5045 (2008).
51. Bruker AXS APEX3 (2015).
52. L. Krause, R. Herbst-Irmer, G. M. Sheldrick, D. Stalke, Comparison of silver and molybdenum microfocus X-ray sources for single-crystal structure determination. *J. Appl. Crystallogr.* **48**, 3–10 (2015).
53. G. M. Sheldrick, SHELXT – Integrated space-group and crystal-structure determination. *Acta Crystallogr. Sect. A Found. Adv.* **71**, 3–8 (2015).
54. G. M. Sheldrick, Crystal structure refinement with SHELXL. *Acta Crystallogr. Sect. C Struct. Chem.* **71**, 3–8 (2015).
55. O. V. Dolomanov, L. J. Bourhis, R. J. Gildea, J. a. K. Howard, H. Puschmann, OLEX2: a complete structure solution, refinement and analysis program. *J. Appl. Crystallogr.* **42**, 339–341 (2009).
56. Accelrys Software Inc., Accelrys DS Visualizer v2.0.1 (2007).
